# Supplementary material for: Whole-Genome DNA Methylation Dynamics of Sheep Preimplantation Embryo Investigated by Single-Cell DNA Methylome Sequencing
Source: Front Genet. 2021 Dec 23;12:753144. doi: 10.3389/fgene.2021.753144 (PMC8733409; doi:10.3389/fgene.2021.753144)
Supplement: Supplementary file 1 [file Table2.XLSX]

## Sheet: Cleanreads
Sample	Blastocyst3	Blastocyst2	Blastocyst1	16-cell3	16-cell2	16-cell1	Morula2	Morula3	Morula1	oocyte1	oocyte2	oocyte3	8-cell1	8-cell3	8-cell2
Raw Reads	428480086	235607184	315086450	105772264	111448590	253461948	118873852	231642438	260494598	242431226	234084306	243579268	122901982	275603998	110753326
Raw Bases (G)	60.42	33.22	44.43	14.91	15.71	35.74	16.76	32.66	36.73	34.18	33.01	34.34	17.33	38.86	15.62
Raw Q30 (%)	72.31	80.03	79.01	82.67	83.03	79.89	82.56	80.68	80.3	79.59	80.12	80.89	82.38	79.78	82.73
Raw GC (%)	29.43	29.22	28.77	27.7	27.66	28.31	27.7	27.97	29.02	30.56	30.61	29.17	28.74	29.04	28.55
Clean Reads	360339528	207555280	273070326	94989466	100335610	225462936	106124360	208467886	233740214	215866766	207960786	218486466	109633388	245261716	99178558
Clean Bases (G)	43.29	26.59	34.69	12.3	13.02	28.69	13.76	26.63	29.69	27.4	26.55	27.96	14.21	31.2	12.87
Clean Q30 (%)	85.1	89.44	88.99	90.86	91.07	89.42	90.72	89.58	89.61	89.15	89.56	89.94	90.62	89.31	90.93
Clean GC (%)	26.6	28.17	26.88	26.57	26.55	27.17	26.42	26.88	27.86	29.54	29.44	28.09	27.57	27.91	27.37
Clean Reads Rate (%)	84.1	88.09	86.67	89.81	90.03	88.95	89.27	90	89.73	89.04	88.84	89.7	89.2	88.99	89.55

## Sheet: Mappedreads
Sample	Blastocyst3	Blastocyst2	Blastocyst1	16-cell3	16-cell2	16-cell1	Morula2	Morula3	Morula1	oocyte1	oocyte2	oocyte3	8-cell1	8-cell3	8-cell2
Clean Reads	360339528	207555280	273070326	94989466	100335610	225462936	106124360	208467886	233740214	215866766	207960786	218486466	109633388	245261716	99178558
Mapped Reads	140158702	79665298	101385790	37398648	35858634	86799614	44606040	90175562	84870828	74178632	68128198	75522466	41312640	85315282	38152602
Mapped Ratio (%)	38.9	38.38	37.13	39.37	35.74	38.5	42.03	43.26	36.31	34.36	32.76	34.57	37.68	34.79	38.47
Unique Mapped Reads	125468512	66157624	90916174	34061690	32326626	77538752	41397570	82634206	75406150	56870454	54720082	65707876	36158648	75013660	33877410
Unique Mapped Ratio (%)	34.8	31.9	33.3	35.9	32.2	34.4	39	39.6	32.3	26.3	26.3	30.1	33	30.6	34.2
Insert Size (bp)	294.11	324.81	319.5	322.26	328.56	321.03	320.67	294.8	318.56	344.91	305.24	307.19	319.56	318.66	318.23
Duplication (%)	47.88	69.23	65.11	21.95	16.9	41.76	10.5	31.16	59.99	68.96	58.64	56.71	24.56	42.01	20.96
