# Supplementary material for: Whole-Genome DNA Methylation Dynamics of Sheep Preimplantation Embryo Investigated by Single-Cell DNA Methylome Sequencing
Source: Front Genet. 2021 Dec 23;12:753144. doi: 10.3389/fgene.2021.753144 (PMC8733409; doi:10.3389/fgene.2021.753144)
Supplement: Supplementary file 4 [file Table3.XLS]

## Sheet: Sample.C_coverage.stat
Sample	Blastocyst3	Blastocyst2	Blastocyst1	16-cell3	16-cell2	16-cell1	Morula2	Morula3	Morula1	oocyte1	oocyte2	oocyte3	8-cell1	8-cell3	8-cell2
CpGs (1x)	9342958	2760263	5042916	10382800	11728008	10964939	16663560	14730237	5711656	3134297	4707404	5520947	10768391	10432732	11013957
Mean Coverage (1x)	1.6877	1.8055	1.7465	1.5608	1.598	1.6833	1.7015	1.7822	1.6572	1.8909	1.8099	1.7478	1.6268	1.7455	1.6054
Percentage (1x) (%)	17.1324	5.0616	9.2473	19.0392	21.5059	20.1067	30.5564	27.0112	10.4736	5.7474	8.6321	10.1239	19.7462	19.1307	20.1965
CpGs (2x)	2388637	503481	1103347	2438414	2906792	2855458	5745551	5070694	1151697	467097	862132	1101232	2651600	2707534	2784708
Mean Coverage (2x)	3.6898	5.4158	4.4118	3.388	3.4127	3.6237	3.0345	3.2722	4.2591	6.978	5.4224	4.7493	3.5457	3.8726	3.3944
Percentage (2x) (%)	4.3801	0.9232	2.0232	4.4714	5.3303	5.2361	10.5357	9.2982	2.1119	0.8565	1.5809	2.0194	4.8623	4.9649	5.1064
CpGs (3x)	657003	143810	311676	536097	640122	731562	1711302	1644993	292376	108397	197490	264302	614280	699559	652830
Mean Coverage (3x)	8.1435	13.9588	10.538	8.3131	8.4153	8.3378	5.4733	5.9216	10.8986	23.4509	16.9402	13.455	8.6721	9.2474	7.9478
Percentage (3x) (%)	1.2048	0.2637	0.5715	0.9831	1.1738	1.3415	3.1381	3.0165	0.5361	0.1988	0.3621	0.4847	1.1264	1.2828	1.1971
CpGs (4x)	201461	52676	105985	120029	138441	197163	465897	524266	91317	35269	56570	77840	142950	189486	152317
Mean Coverage (4x)	19.7741	32.9184	25.1675	26.7306	28.0391	22.8057	12.0848	12.167	28.2897	65.8546	51.6663	38.4996	27.3739	26.0648	24.2063
Percentage (4x) (%)	0.3694	0.0966	0.1943	0.2201	0.2539	0.3615	0.8543	0.9614	0.1675	0.0647	0.1037	0.1427	0.2621	0.3475	0.2793
CpGs (5x)	72353	23701	43302	32327	35044	60966	126811	169931	35402	15911	21550	29005	38597	58803	41491
Mean Coverage (5x)	47.9216	68.2719	55.8091	88.3978	98.9662	64.8174	33.7032	29.1965	66.6535	141.109	129.127	96.5857	90.5689	75.1012	78.1791
Percentage (5x) (%)	0.1327	0.0435	0.0794	0.0593	0.0643	0.1118	0.2325	0.3116	0.0649	0.0292	0.0395	0.0532	0.0708	0.1078	0.0761
CpGs (10x)	8342	4444	6113	6345	6871	7856	9025	10057	6203	4840	5445	5893	6735	7604	7014
Mean Coverage (10x)	372.697	339.173	360.585	428.178	482.561	465.955	403.535	406.482	353.786	450.787	494.307	453.41	493.384	543.791	435.827
Percentage (10x) (%)	0.0153	0.0081	0.0112	0.0116	0.0126	0.0144	0.0165	0.0184	0.0114	0.0089	0.01	0.0108	0.0124	0.0139	0.0129
