# Supplementary material for: Whole-Genome DNA Methylation Dynamics of Sheep Preimplantation Embryo Investigated by Single-Cell DNA Methylome Sequencing
Source: Front Genet. 2021 Dec 23;12:753144. doi: 10.3389/fgene.2021.753144 (PMC8733409; doi:10.3389/fgene.2021.753144)
Supplement: Supplementary file 6 [file Table4.XLSX]

## Sheet: 8-cell_VS_16-cell.DMR
Chr	Start	End	Length	N_CG	Methyl_C8	Methyl_C16	Diff_methyl	AreaStat	Direction		Chr	Start	End	Length	N_CG	Methyl_C8	Methyl_C16	Diff_methyl	AreaStat	Direction
NC_019477.2	8219655	8219721	66	4	0.0774	0.7976	-0.7202	-26.1092	Hypo		NC_019466.2	13825657	13826034	377	70	0.3913	0.1076	0.2837	588.276	Hyper
NC_019479.2	22903916	22904008	92	4	0.0922	0.803	-0.7108	-24.3143	Hypo		NC_019484.2	52282642	52282711	69	19	0.444	0.1413	0.3026	97.4597	Hyper
NC_019460.2	2142455	2142519	64	4	0.0953	0.8003	-0.705	-23.6519	Hypo		NC_019465.2	16331362	16331616	254	21	0.3759	0.0704	0.3056	117.376	Hyper
NC_019462.2	34990536	34990642	106	4	0.078	0.7823	-0.7044	-24.5781	Hypo		NC_019474.2	12298792	12298991	199	18	0.4036	0.0949	0.3087	114.961	Hyper
NC_019470.2	74499708	74499807	99	5	0.1143	0.8179	-0.7036	-29.8664	Hypo		NC_019484.2	24233287	24233379	92	5	0.607	0.2924	0.3146	24.946	Hyper
NC_019462.2	96684	96809	125	6	0.0569	0.7572	-0.7004	-46.4688	Hypo		NC_019482.2	2156	2655	499	57	0.3916	0.0744	0.3172	598.795	Hyper
NC_019469.2	40283252	40283406	154	7	0.0727	0.7621	-0.6894	-51.2045	Hypo		NC_019481.2	914234	914336	102	16	0.4375	0.1141	0.3235	78.6356	Hyper
NC_019473.2	25995265	25995322	57	4	0.0574	0.742	-0.6847	-23.4355	Hypo		NC_019478.2	48349887	48349938	51	11	0.3912	0.0638	0.3274	61.61	Hyper
NC_019460.2	218103655	218103721	66	4	0.0953	0.7642	-0.669	-20.7055	Hypo		NC_019474.2	70134745	70134839	94	7	0.4801	0.1473	0.3328	31.8208	Hyper
NC_019459.2	243084212	243084315	103	5	0.0974	0.7653	-0.6679	-27.8062	Hypo		NC_019460.2	200961603	200961731	128	11	0.4849	0.1474	0.3375	51.0313	Hyper
NC_019460.2	213127700	213127802	102	6	0.0779	0.7453	-0.6674	-37.7442	Hypo		NC_019460.2	223810479	223810564	85	18	0.5932	0.2545	0.3387	66.9321	Hyper
NC_019467.2	77680486	77680576	90	4	0.0898	0.7556	-0.6658	-19.9862	Hypo		NC_019475.2	57343908	57344246	338	24	0.4394	0.0912	0.3482	125.917	Hyper
NC_019462.2	17133796	17133886	90	4	0.1045	0.7692	-0.6648	-19.9661	Hypo		NC_019480.2	3512794	3512849	55	4	0.6298	0.2809	0.3489	18.167	Hyper
NC_019460.2	28129967	28130067	100	5	0.11	0.7743	-0.6643	-26.8368	Hypo		NC_019474.2	64950277	64950352	75	9	0.4783	0.1284	0.3499	34.1815	Hyper
NC_019462.2	15706314	15706367	53	4	0.092	0.7562	-0.6642	-19.7199	Hypo		NC_019465.2	89407699	89407793	94	14	0.5312	0.1775	0.3537	65.5014	Hyper
NC_019482.2	42597736	42597830	94	4	0.0951	0.7571	-0.6621	-20.2985	Hypo		NC_019479.2	43393285	43393428	143	15	0.7565	0.4024	0.3541	66.8511	Hyper
NC_019464.2	76478897	76479001	104	5	0.1012	0.7613	-0.6601	-27.6573	Hypo		NC_019468.2	33593290	33593487	197	25	0.6186	0.2635	0.3551	120.962	Hyper
NC_019459.2	227717195	227717350	155	4	0.0897	0.7491	-0.6594	-25.842	Hypo		NC_019476.2	15244579	15244717	138	23	0.588	0.2316	0.3564	107.83	Hyper
NC_019468.2	56569710	56569796	86	6	0.1014	0.7574	-0.656	-32.7432	Hypo		NC_019481.2	41078510	41078679	169	23	0.6267	0.2691	0.3576	102.657	Hyper
NC_019466.2	21912275	21912417	142	14	0.0822	0.7326	-0.6504	-127.585	Hypo		NC_019465.2	7149611	7149670	59	8	0.4331	0.0751	0.358	32.6637	Hyper
NC_019474.2	44339205	44339366	161	7	0.0842	0.7342	-0.65	-43.8187	Hypo		NC_019476.2	53495242	53495298	56	8	0.6819	0.3228	0.3591	31.0077	Hyper
NC_019481.2	41504420	41504544	124	9	0.0465	0.6958	-0.6493	-66.7363	Hypo		NC_019484.2	57962870	57963112	242	18	0.4374	0.0758	0.3616	83.761	Hyper
NC_019458.2	70024079	70024359	280	4	0.0546	0.7028	-0.6482	-19.6254	Hypo		NC_019481.2	8986905	8986956	51	5	0.4962	0.1344	0.3618	20.4548	Hyper
NC_019471.2	44915839	44915939	100	7	0.1139	0.7614	-0.6475	-40.1545	Hypo		NC_019482.2	43770064	43770141	77	11	0.4858	0.1233	0.3625	43.7719	Hyper
NC_019476.2	1691864	1691960	96	8	0.1713	0.8187	-0.6474	-47.4524	Hypo		NC_019478.2	46181510	46181587	77	10	0.4423	0.079	0.3633	40.9301	Hyper
NC_019460.2	5259509	5259593	84	5	0.1091	0.7548	-0.6457	-24.3289	Hypo		NC_019464.2	83570	83690	120	5	0.5127	0.149	0.3637	19.6045	Hyper
NC_019476.2	47181355	47181470	115	7	0.1339	0.7785	-0.6446	-39.1232	Hypo		NC_019475.2	63115147	63115249	102	10	0.7378	0.374	0.3639	39.8315	Hyper
NC_019481.2	14323262	14323329	67	6	0.1198	0.7622	-0.6424	-31.2535	Hypo		NC_019475.2	63838721	63838779	58	11	0.5914	0.2274	0.364	45.3994	Hyper
NC_019471.2	25237468	25237554	86	6	0.0893	0.731	-0.6418	-32.8877	Hypo		NC_019462.2	48282423	48282627	204	23	0.4983	0.1325	0.3659	111.244	Hyper
NC_019481.2	4843583	4843667	84	6	0.1237	0.7622	-0.6384	-31.0488	Hypo		NC_019476.2	57691854	57691931	77	8	0.6224	0.2559	0.3665	28.7073	Hyper
NC_019476.2	25637325	25637399	74	4	0.1932	0.8296	-0.6363	-20.8336	Hypo		NC_019481.2	34473368	34473448	80	11	0.5506	0.1828	0.3679	39.3543	Hyper
NC_019464.2	77166981	77167078	97	6	0.1192	0.7541	-0.6349	-34.6277	Hypo		NC_019481.2	39437352	39437613	261	21	0.5085	0.1375	0.371	109.086	Hyper
NC_019471.2	7435582	7435791	209	9	0.1185	0.7526	-0.6342	-53.4284	Hypo		NC_019462.2	40584765	40584854	89	7	0.6596	0.2883	0.3713	23.8506	Hyper
NC_019474.2	12763772	12763873	101	4	0.121	0.7542	-0.6332	-17.5706	Hypo		NC_019459.2	248020107	248020254	147	21	0.5545	0.183	0.3715	81.1108	Hyper
NC_019470.2	71327083	71327204	121	5	0.1589	0.79	-0.6311	-24.6602	Hypo		NC_019464.2	12110491	12110655	164	11	0.4418	0.0687	0.373	47.9834	Hyper
NC_019460.2	2329129	2329229	100	10	0.1591	0.7902	-0.631	-59.0638	Hypo		NC_019479.2	50001480	50001714	234	20	0.5068	0.1311	0.3757	92.3314	Hyper
NC_019460.2	133265228	133265291	63	4	0.1067	0.7368	-0.6301	-17.4061	Hypo		NC_019484.2	3590225	3590556	331	18	0.5192	0.1429	0.3763	90.1506	Hyper
NC_019479.2	20138989	20139117	128	9	0.1061	0.7356	-0.6295	-53.9954	Hypo		NC_019469.2	27014164	27014296	132	14	0.453	0.0756	0.3774	59.4443	Hyper
NC_019474.2	62725888	62725975	87	5	0.1288	0.7571	-0.6283	-22.9883	Hypo		NC_019464.2	98767723	98767846	123	25	0.5146	0.136	0.3786	126.021	Hyper
NC_019471.2	13212640	13212734	94	5	0.1048	0.7332	-0.6283	-23.4516	Hypo		NC_019473.2	3754695	3754800	105	11	0.554	0.1737	0.3803	47.0509	Hyper
NC_019471.2	57077456	57077538	82	4	0.097	0.7244	-0.6273	-17.5729	Hypo		NC_019466.2	15113486	15113580	94	12	0.4747	0.0935	0.3812	51.0713	Hyper
NC_019468.2	53386558	53386643	85	8	0.1384	0.7632	-0.6248	-43.4018	Hypo		NC_019477.2	18140194	18140455	261	18	0.5168	0.1341	0.3826	91.6899	Hyper
NC_019460.2	136352251	136352349	98	10	0.0912	0.7156	-0.6244	-69.2087	Hypo		NC_019481.2	2240095	2240256	161	11	0.5367	0.1537	0.3829	40.2367	Hyper
NC_019460.2	217750397	217750478	81	4	0.1137	0.7368	-0.6231	-16.8211	Hypo		NC_019459.2	45348791	45348897	106	12	0.5525	0.1691	0.3834	40.7414	Hyper
NC_019461.2	93384918	93384993	75	6	0.1567	0.7786	-0.6219	-28.5908	Hypo		NC_019468.2	52270081	52270242	161	22	0.4647	0.0811	0.3837	120.904	Hyper
NC_019483.2	40232561	40232909	348	16	0.1193	0.7402	-0.6209	-129.712	Hypo		NC_019467.2	36005735	36005835	100	6	0.5733	0.1886	0.3848	22.7416	Hyper
NC_019471.2	7589340	7589485	145	8	0.1557	0.776	-0.6203	-42.1273	Hypo		NC_019471.2	9763079	9763190	111	12	0.5726	0.1873	0.3854	40.3279	Hyper
NC_019482.2	42499996	42500082	86	5	0.1088	0.728	-0.6192	-22.6705	Hypo		NC_019471.2	7642451	7642522	71	4	0.4797	0.093	0.3867	13.284	Hyper
NC_019461.2	92497342	92497399	57	4	0.0609	0.6796	-0.6187	-23.5593	Hypo		NC_019475.2	19932787	19932897	110	10	0.5175	0.1307	0.3868	39.1454	Hyper
NC_019478.2	39941613	39941712	99	5	0.1106	0.729	-0.6184	-22.4918	Hypo		NC_019474.2	48062116	48062168	52	6	0.4902	0.1017	0.3885	23.0177	Hyper
NC_019470.2	38077745	38077820	75	8	0.1275	0.7444	-0.6169	-42.2228	Hypo		NC_019471.2	10784161	10784288	127	21	0.5728	0.182	0.3908	100.713	Hyper
NC_019462.2	18455088	18455182	94	5	0.101	0.7175	-0.6165	-24.3456	Hypo		NC_019470.2	78199286	78199352	66	9	0.5283	0.1362	0.3921	31.251	Hyper
NC_019479.2	42854858	42854954	96	7	0.1338	0.7501	-0.6163	-34.8487	Hypo		NC_019484.2	78085183	78085355	172	8	0.5324	0.1382	0.3942	36.5289	Hyper
NC_019461.2	118915734	118915850	116	6	0.1608	0.7766	-0.6158	-26.8753	Hypo		NC_019460.2	223410592	223410722	130	17	0.56	0.165	0.395	69.8589	Hyper
NC_019481.2	41791179	41791235	56	5	0.1298	0.7455	-0.6157	-21.9064	Hypo		NC_019477.2	6889077	6889173	96	14	0.5577	0.159	0.3987	53.4326	Hyper
NC_019474.2	44839459	44839513	54	4	0.1212	0.7347	-0.6136	-21.2131	Hypo		NC_019479.2	41484115	41484201	86	13	0.595	0.1961	0.3989	48.9853	Hyper
NC_019480.2	42488756	42488828	72	5	0.1277	0.7405	-0.6128	-21.442	Hypo		NC_019479.2	49562195	49562279	84	11	0.6149	0.2152	0.3997	39.5325	Hyper
NC_019470.2	53980469	53980559	90	5	0.0948	0.7072	-0.6124	-24.0228	Hypo		NC_019475.2	67306821	67306946	125	12	0.575	0.1746	0.4004	45.062	Hyper
NC_019461.2	90968442	90968506	64	10	0.1763	0.7879	-0.6115	-54.6484	Hypo		NC_019476.2	59787251	59787381	130	13	0.7271	0.3265	0.4007	45.0068	Hyper
NC_019460.2	178415407	178415500	93	4	0.1067	0.718	-0.6112	-16.3813	Hypo		NC_019473.2	71223111	71223348	237	13	0.4469	0.0453	0.4015	71.527	Hyper
NC_019481.2	40838103	40838197	94	7	0.0787	0.6896	-0.6109	-38.0854	Hypo		NC_019458.2	7267861	7267952	91	16	0.611	0.2095	0.4016	60.0093	Hyper
NC_019480.2	55344494	55344649	155	11	0.0997	0.7094	-0.6097	-75.0462	Hypo		NC_019469.2	852093	852252	159	16	0.5548	0.1531	0.4017	65.0549	Hyper
NC_019475.2	63884895	63885103	208	5	0.1261	0.7354	-0.6093	-21.3216	Hypo		NC_019460.2	211787302	211787402	100	9	0.5626	0.1609	0.4018	32.7812	Hyper
NC_019469.2	58449919	58449987	68	5	0.1257	0.734	-0.6083	-21.2943	Hypo		NC_019468.2	49121169	49121257	88	11	0.5626	0.1608	0.4019	39.6254	Hyper
NC_019481.2	26284169	26284257	88	12	0.1539	0.7622	-0.6083	-72.6574	Hypo		NC_019459.2	864583	864756	173	18	0.5184	0.1164	0.402	87.7883	Hyper
NC_019482.2	42793819	42793900	81	6	0.0878	0.6958	-0.608	-29.5315	Hypo		NC_019470.2	36833154	36833374	220	12	0.5597	0.1576	0.4021	49.4471	Hyper
NC_019484.2	60880988	60881163	175	6	0.1638	0.7717	-0.6079	-37.9175	Hypo		NC_019476.2	58579860	58580012	152	12	0.5133	0.111	0.4024	47.6802	Hyper
NC_019471.2	48696404	48696505	101	7	0.1172	0.725	-0.6078	-34.1138	Hypo		NC_019475.2	15742857	15742938	81	12	0.6513	0.2487	0.4026	42.8406	Hyper
NC_019479.2	49200818	49200884	66	5	0.1127	0.7199	-0.6073	-21.5864	Hypo		NC_019478.2	45933597	45933825	228	15	0.522	0.1193	0.4028	71.3285	Hyper
NC_019479.2	49809017	49809179	162	12	0.1173	0.7244	-0.6071	-83.3073	Hypo		NC_019470.2	78741531	78741635	104	11	0.6806	0.2774	0.4031	36.492	Hyper
NC_019474.2	71770812	71770896	84	6	0.152	0.7589	-0.6069	-27.0818	Hypo		NC_019482.2	34387344	34387421	77	5	0.501	0.0976	0.4034	16.8921	Hyper
NC_019480.2	4361342	4361396	54	5	0.1198	0.7262	-0.6064	-21.1371	Hypo		NC_019470.2	9787836	9787947	111	13	0.5328	0.1292	0.4036	54.9235	Hyper
NC_019462.2	16674972	16675065	93	6	0.1309	0.7366	-0.6057	-26.7432	Hypo		NC_019469.2	29580582	29580667	85	7	0.5608	0.1571	0.4037	25.3266	Hyper
NC_019462.2	9342037	9342171	134	7	0.0677	0.6733	-0.6056	-38.1215	Hypo		NC_019474.2	60839237	60839303	66	5	0.7277	0.3239	0.4038	17.4566	Hyper
NC_019474.2	59213442	59213538	96	5	0.1883	0.7935	-0.6052	-24.7538	Hypo		NC_019484.2	449685	449794	109	9	0.5121	0.1083	0.4038	32.9492	Hyper
NC_019464.2	44246964	44247144	180	8	0.1508	0.7535	-0.6028	-44.6734	Hypo		NC_019477.2	16149103	16149186	83	10	0.524	0.1189	0.405	38.0543	Hyper
NC_019460.2	2931143	2931242	99	6	0.1425	0.7453	-0.6028	-26.3643	Hypo		NC_019460.2	101424352	101424423	71	8	0.5664	0.1609	0.4055	26.6855	Hyper
NC_019473.2	4661989	4662062	73	5	0.1003	0.7016	-0.6012	-21.2133	Hypo		NC_019479.2	49688372	49688755	383	45	0.4527	0.0472	0.4055	383.265	Hyper
NC_019480.2	54073296	54073366	70	4	0.2441	0.8427	-0.5986	-19.0845	Hypo		NC_019460.2	173774771	173774920	149	16	0.5799	0.1738	0.4061	69.983	Hyper
NC_019460.2	104070366	104070442	76	5	0.1294	0.7278	-0.5984	-20.3913	Hypo		NC_019470.2	38934108	38934311	203	15	0.5496	0.1433	0.4064	64.6378	Hyper
NC_019468.2	49054848	49054942	94	4	0.11	0.7083	-0.5983	-15.6779	Hypo		NC_019460.2	150382082	150382192	110	5	0.4859	0.0788	0.4072	19.0242	Hyper
NC_019479.2	23195420	23195574	154	12	0.0952	0.6905	-0.5953	-83.6843	Hypo		NC_019471.2	47527068	47527246	178	18	0.595	0.1877	0.4073	77.7003	Hyper
NC_019467.2	68183144	68183213	69	5	0.1096	0.7046	-0.595	-20.5266	Hypo		NC_019469.2	47431705	47431812	107	10	0.6207	0.2128	0.4079	45.2325	Hyper
NC_019460.2	7709031	7709085	54	6	0.1023	0.6965	-0.5942	-27.0763	Hypo		NC_019475.2	5045254	5045338	84	6	0.5411	0.1327	0.4084	22.232	Hyper
NC_019469.2	48693332	48693428	96	5	0.1415	0.734	-0.5925	-19.9695	Hypo		NC_019473.2	62942766	62942863	97	10	0.5297	0.1208	0.4089	38.0448	Hyper
NC_019461.2	76993290	76993392	102	11	0.2062	0.7987	-0.5924	-60.9145	Hypo		NC_019460.2	207233815	207233890	75	5	0.4782	0.069	0.4092	21.0528	Hyper
NC_019477.2	47601914	47602003	89	4	0.072	0.6639	-0.5919	-16.2729	Hypo		NC_019474.2	70157612	70158041	429	32	0.4881	0.0784	0.4097	231.546	Hyper
NC_019458.2	55160202	55160287	85	5	0.114	0.7054	-0.5914	-20.9208	Hypo		NC_019471.2	18144768	18144921	153	13	0.6237	0.2114	0.4123	48.3381	Hyper
NC_019471.2	44982581	44982640	59	7	0.1342	0.725	-0.5908	-31.7167	Hypo		NC_019469.2	2572447	2572543	96	6	0.6638	0.2515	0.4123	22.0934	Hyper
NC_019464.2	14421840	14421930	90	4	0.2166	0.8063	-0.5897	-18.1616	Hypo		NC_019478.2	46714776	46714887	111	11	0.5915	0.179	0.4124	45.7535	Hyper
NC_019478.2	42056274	42056339	65	5	0.1393	0.729	-0.5897	-19.6319	Hypo		NC_019460.2	17690285	17690370	85	9	0.5911	0.1785	0.4126	36.1075	Hyper
NC_019484.2	66787010	66787197	187	9	0.0971	0.6866	-0.5895	-55.4375	Hypo		NC_019484.2	81018243	81018345	102	7	0.4899	0.0764	0.4134	27.7266	Hyper
NC_019474.2	69474442	69474527	85	9	0.1401	0.7296	-0.5894	-45.7248	Hypo		NC_019471.2	13644683	13644756	73	8	0.5241	0.1095	0.4146	35.7273	Hyper
NC_019473.2	71689508	71689625	117	6	0.0797	0.6665	-0.5868	-31.9001	Hypo		NC_019462.2	6311416	6311604	188	17	0.6504	0.2354	0.415	75.145	Hyper
NC_019476.2	53216926	53217038	112	5	0.1059	0.6927	-0.5868	-24.306	Hypo		NC_019459.2	56735271	56735364	93	14	0.6095	0.1942	0.4153	52.1819	Hyper
NC_019476.2	831697	831782	85	4	0.1546	0.7408	-0.5862	-14.4507	Hypo		NC_019473.2	56352640	56352828	188	20	0.5092	0.0925	0.4166	116.321	Hyper
NC_019461.2	5950351	5950442	91	5	0.1406	0.7258	-0.5853	-19.3516	Hypo		NC_019462.2	17319241	17319322	81	8	0.774	0.3569	0.4171	28.7434	Hyper
NC_019481.2	1354863	1354940	77	4	0.0515	0.6364	-0.5848	-20.0512	Hypo		NC_019475.2	31146270	31146387	117	13	0.6214	0.204	0.4174	48.9948	Hyper
NC_019470.2	54605915	54605979	64	6	0.1212	0.7052	-0.584	-25.5094	Hypo		NC_019470.2	78860582	78860663	81	9	0.5975	0.1796	0.4179	31.6061	Hyper
NC_019473.2	41727521	41727576	55	5	0.0852	0.6686	-0.5834	-21.6284	Hypo		NC_019481.2	38517322	38517418	96	8	0.5511	0.1313	0.4199	28.1342	Hyper
NC_019484.2	192142	192234	92	8	0.1246	0.7066	-0.582	-40.7674	Hypo		NC_019470.2	79253135	79253215	80	8	0.6056	0.1855	0.4201	27.2862	Hyper
NC_019469.2	74932284	74932355	71	7	0.146	0.7259	-0.5799	-30.5452	Hypo		NC_019464.2	23226466	23226602	136	16	0.5708	0.1502	0.4206	74.2066	Hyper
NC_019469.2	76683366	76683456	90	7	0.146	0.7259	-0.5799	-30.5448	Hypo		NC_019466.2	16998096	16998241	145	14	0.57	0.1492	0.4208	56.937	Hyper
NC_019462.2	18859127	18859302	175	12	0.1473	0.7269	-0.5796	-69.327	Hypo		NC_019464.2	6485516	6485586	70	4	0.5235	0.1018	0.4217	12.8825	Hyper
NC_019460.2	214403859	214403943	84	4	0.254	0.8322	-0.5781	-17.4943	Hypo		NC_019462.2	36311964	36312124	160	12	0.5575	0.1357	0.4218	48.8265	Hyper
NC_019470.2	6075339	6075429	90	4	0.1275	0.7052	-0.5777	-14.2404	Hypo		NC_019460.2	162801155	162801263	108	10	0.6844	0.2624	0.4219	38.1803	Hyper
NC_019470.2	45574520	45574621	101	4	0.1275	0.7052	-0.5777	-14.2402	Hypo		NC_019477.2	47903148	47903383	235	11	0.5188	0.0966	0.4222	59.1028	Hyper
NC_019478.2	49047149	49047276	127	10	0.1393	0.7165	-0.5772	-55.9213	Hypo		NC_019468.2	41841287	41841368	81	8	0.5376	0.1148	0.4227	27.7812	Hyper
NC_019468.2	47696898	47696979	81	6	0.0944	0.6701	-0.5758	-35.123	Hypo		NC_019467.2	85520380	85520508	128	15	0.5029	0.0799	0.423	80.0099	Hyper
NC_019462.2	85576790	85576845	55	5	0.2101	0.7858	-0.5757	-23.257	Hypo		NC_019471.2	11759915	11760000	85	8	0.4978	0.0747	0.4231	33.3635	Hyper
NC_019476.2	58648263	58648318	55	7	0.1426	0.7183	-0.5756	-34.607	Hypo		NC_019478.2	48164162	48164286	124	10	0.5674	0.144	0.4233	35.6096	Hyper
NC_019465.2	88348516	88348628	112	6	0.1841	0.7588	-0.5747	-28.9716	Hypo		NC_019459.2	110855224	110855317	93	9	0.5352	0.1117	0.4234	33.0129	Hyper
NC_019476.2	16870190	16870249	59	6	0.1667	0.7408	-0.5741	-23.9998	Hypo		NC_019472.2	23186820	23186891	71	5	0.5404	0.117	0.4235	15.418	Hyper
NC_019480.2	37405948	37406025	77	6	0.121	0.6946	-0.5736	-24.7623	Hypo		NC_019471.2	1880929	1881212	283	21	0.5445	0.12	0.4245	109.092	Hyper
NC_019464.2	26889146	26889263	117	6	0.1079	0.6798	-0.5719	-25.312	Hypo		NC_019466.2	39921696	39921750	54	7	0.5124	0.088	0.4245	24.0765	Hyper
NC_019482.2	41934770	41934856	86	8	0.0799	0.6512	-0.5713	-46.04	Hypo		NC_019470.2	10172333	10172421	88	8	0.5797	0.155	0.4246	27.0407	Hyper
NC_019478.2	49014867	49014976	109	7	0.0838	0.6547	-0.5708	-39.1776	Hypo		NC_019481.2	40876764	40876826	62	8	0.5861	0.1605	0.4256	29.1936	Hyper
NC_019475.2	6678094	6678187	93	6	0.1344	0.7049	-0.5705	-24.2543	Hypo		NC_019459.2	3068794	3069074	280	19	0.5729	0.1467	0.4262	92.074	Hyper
NC_019469.2	45225366	45225455	89	6	0.1341	0.7034	-0.5694	-24.2116	Hypo		NC_019460.2	9548501	9548603	102	13	0.6796	0.2529	0.4267	49.0571	Hyper
NC_019469.2	78894121	78894180	59	4	0.1341	0.7034	-0.5694	-13.8993	Hypo		NC_019468.2	20459831	20460255	424	23	0.588	0.1612	0.4268	108.467	Hyper
NC_019470.2	68684792	68684891	99	4	0.0632	0.6326	-0.5694	-18.2641	Hypo		NC_019479.2	48849274	48849365	91	10	0.5543	0.1271	0.4272	36.2927	Hyper
NC_019468.2	12797566	12797662	96	4	0.1186	0.6861	-0.5676	-14.0275	Hypo		NC_019472.2	72329888	72330018	130	7	0.5442	0.117	0.4272	23.5824	Hyper
NC_019475.2	20572450	20572607	157	12	0.1611	0.7283	-0.5672	-66.6945	Hypo		NC_019470.2	69994949	69995044	95	5	0.5178	0.0904	0.4274	16.8987	Hyper
NC_019471.2	12588490	12588881	391	9	0.0972	0.6636	-0.5665	-44.0077	Hypo		NC_019478.2	46890167	46890316	149	13	0.5873	0.1592	0.4281	53.2726	Hyper
NC_019468.2	26504097	26504469	372	22	0.1142	0.6801	-0.5659	-161.224	Hypo		NC_019462.2	10569385	10569818	433	22	0.5268	0.0986	0.4282	108.898	Hyper
NC_019460.2	211204683	211204795	112	6	0.1226	0.6883	-0.5656	-27.91	Hypo		NC_019470.2	11339378	11339481	103	7	0.5552	0.1268	0.4285	24.1387	Hyper
NC_019476.2	16564940	16565001	61	7	0.154	0.7176	-0.5636	-29.2952	Hypo		NC_019479.2	48715455	48715558	103	8	0.5267	0.0971	0.4296	31.7616	Hyper
NC_019466.2	75585441	75585707	266	6	0.1435	0.7065	-0.563	-25.5353	Hypo		NC_019458.2	261787166	261787240	74	5	0.5509	0.1208	0.4301	16.3143	Hyper
NC_019459.2	1213605	1213718	113	7	0.0657	0.6285	-0.5628	-35.5671	Hypo		NC_019476.2	56036857	56037158	301	17	0.6887	0.2585	0.4303	77.8985	Hyper
NC_019474.2	50646513	50646583	70	4	0.1017	0.6632	-0.5615	-17.9489	Hypo		NC_019472.2	3984419	3984585	166	12	0.5302	0.0996	0.4305	55.8596	Hyper
NC_019470.2	74522861	74522948	87	7	0.1178	0.6788	-0.561	-29.9415	Hypo		NC_019460.2	210577480	210577589	109	6	0.4988	0.0677	0.4312	24.4061	Hyper
NC_019465.2	81685801	81685898	97	6	0.1033	0.6629	-0.5596	-24.5903	Hypo		NC_019468.2	38873283	38873381	98	6	0.5751	0.1429	0.4322	21.9901	Hyper
NC_019479.2	46825225	46825296	71	5	0.0957	0.655	-0.5592	-22.9262	Hypo		NC_019460.2	103997468	103997582	114	8	0.5408	0.1084	0.4324	29.6521	Hyper
NC_019468.2	56708636	56708863	227	10	0.0583	0.6167	-0.5583	-61.9502	Hypo		NC_019469.2	71472606	71472741	135	7	0.5254	0.0928	0.4326	27.9711	Hyper
NC_019474.2	67011817	67011917	100	5	0.1175	0.674	-0.5565	-18.8393	Hypo		NC_019464.2	99122822	99122935	113	10	0.5126	0.0797	0.4329	46.3677	Hyper
NC_019461.2	115768637	115768930	293	15	0.1491	0.7033	-0.5542	-92.1353	Hypo		NC_019468.2	8252512	8252612	100	5	0.5481	0.1147	0.4333	18.1508	Hyper
NC_019459.2	42791286	42791415	129	7	0.1138	0.668	-0.5542	-30.7411	Hypo		NC_019464.2	96766584	96766657	73	4	0.5337	0.0989	0.4348	17.9903	Hyper
NC_019459.2	239450404	239450494	90	7	0.1365	0.6907	-0.5542	-28.6655	Hypo		NC_019481.2	38745862	38745961	99	11	0.5235	0.0873	0.4362	51.9512	Hyper
NC_019466.2	29928815	29928912	97	5	0.1318	0.6851	-0.5533	-18.0934	Hypo		NC_019460.2	223580646	223580727	81	5	0.5312	0.095	0.4363	18.2292	Hyper
NC_019475.2	25734495	25734576	81	6	0.0972	0.6503	-0.5531	-28.1945	Hypo		NC_019473.2	70827508	70827606	98	9	0.5577	0.1211	0.4366	32.3393	Hyper
NC_019482.2	35431572	35431778	206	10	0.2226	0.7756	-0.553	-53.5105	Hypo		NC_019474.2	68015976	68016055	79	7	0.5177	0.0806	0.4372	30.1502	Hyper
NC_019467.2	35535817	35535903	86	6	0.0872	0.6377	-0.5505	-25.3674	Hypo		NC_019471.2	828533	828787	254	14	0.5644	0.1273	0.4372	63.3944	Hyper
NC_019475.2	15748999	15749082	83	8	0.1569	0.7062	-0.5493	-37.7905	Hypo		NC_019475.2	32087538	32087608	70	4	0.7041	0.2669	0.4372	12.5589	Hyper
NC_019475.2	66232355	66232410	55	10	0.12	0.6684	-0.5484	-51.3147	Hypo		NC_019460.2	219272714	219272903	189	14	0.577	0.1398	0.4372	70.5678	Hyper
NC_019481.2	539971	540043	72	5	0.0687	0.6164	-0.5477	-24.148	Hypo		NC_019467.2	84183502	84183611	109	8	0.5322	0.0939	0.4383	32.4875	Hyper
NC_019465.2	82331390	82331523	133	7	0.1004	0.6463	-0.5459	-33.0206	Hypo		NC_019484.2	125552294	125552407	113	9	0.499	0.0597	0.4393	46.9795	Hyper
NC_019472.2	27897262	27897332	70	5	0.1031	0.6486	-0.5456	-18.3398	Hypo		NC_019462.2	15622987	15623052	65	9	0.5185	0.0783	0.4402	40.0956	Hyper
NC_019474.2	70929046	70929248	202	11	0.1246	0.6697	-0.5451	-69.614	Hypo		NC_019459.2	224726783	224726975	192	13	0.5593	0.1191	0.4402	56.2828	Hyper
NC_019481.2	39429808	39429953	145	11	0.1066	0.6514	-0.5448	-69.6597	Hypo		NC_019460.2	51408139	51408197	58	6	0.5644	0.1239	0.4405	20.731	Hyper
NC_019466.2	94331072	94331173	101	14	0.19	0.7347	-0.5448	-74.7473	Hypo		NC_019478.2	48631674	48631845	171	14	0.5282	0.0877	0.4405	71.6988	Hyper
NC_019474.2	63235290	63235419	129	7	0.0928	0.6373	-0.5445	-34.9876	Hypo		NC_019471.2	19723413	19723496	83	7	0.5872	0.1465	0.4407	27.1576	Hyper
NC_019467.2	84390590	84390687	97	5	0.1028	0.6472	-0.5444	-21.0923	Hypo		NC_019482.2	43027078	43027175	97	4	0.5394	0.0949	0.4445	12.5281	Hyper
NC_019480.2	56623690	56623832	142	8	0.0861	0.63	-0.5439	-41.9139	Hypo		NC_019462.2	13383994	13384088	94	7	0.5806	0.1354	0.4453	26.4822	Hyper
NC_019467.2	85817823	85817977	154	12	0.1276	0.6713	-0.5437	-63.1495	Hypo		NC_019476.2	54418748	54418828	80	11	0.6162	0.1706	0.4456	46.3041	Hyper
NC_019461.2	105635498	105635598	100	7	0.2932	0.8367	-0.5435	-29.6281	Hypo		NC_019466.2	15626961	15627049	88	8	0.5286	0.0819	0.4467	36.1439	Hyper
NC_019472.2	75346136	75346239	103	10	0.0855	0.6288	-0.5433	-59.3886	Hypo		NC_019478.2	47512847	47512937	90	7	0.5824	0.1355	0.4468	22.9769	Hyper
NC_019466.2	75509031	75509106	75	5	0.0901	0.6334	-0.5433	-21.7218	Hypo		NC_019471.2	10518271	10518363	92	6	0.584	0.1368	0.4472	18.4208	Hyper
NC_019483.2	5330784	5330896	112	10	0.1576	0.6999	-0.5423	-48.7366	Hypo		NC_019479.2	23172773	23172867	94	7	0.5538	0.1061	0.4478	23.6188	Hyper
NC_019481.2	35017293	35017392	99	4	0.0956	0.6364	-0.5408	-16.5684	Hypo		NC_019470.2	36851005	36851111	106	9	0.741	0.293	0.448	42.7158	Hyper
NC_019460.2	3002977	3003151	174	10	0.2194	0.7601	-0.5406	-54.4011	Hypo		NC_019470.2	41707172	41707238	66	6	0.6589	0.2108	0.4481	20.9414	Hyper
NC_019462.2	105473874	105473975	101	4	0.098	0.6377	-0.5397	-15.8849	Hypo		NC_019483.2	14294819	14294904	85	6	0.6001	0.1517	0.4483	19.4922	Hyper
NC_019481.2	22497241	22497548	307	6	0.09	0.6279	-0.5379	-28.2076	Hypo		NC_019466.2	23216118	23216177	59	6	0.5843	0.1351	0.4492	19.1491	Hyper
NC_019459.2	218927746	218927895	149	4	0.1819	0.7182	-0.5363	-13.6042	Hypo		NC_019474.2	45266234	45266301	67	5	0.5226	0.0731	0.4494	18.9785	Hyper
NC_019460.2	134077417	134077469	52	8	0.1551	0.6897	-0.5347	-35.3981	Hypo		NC_019479.2	50090901	50091031	130	16	0.5009	0.0515	0.4494	99.9382	Hyper
NC_019460.2	219410488	219410730	242	10	0.0794	0.614	-0.5347	-60.9277	Hypo		NC_019458.2	119453727	119453827	100	10	0.6603	0.2108	0.4495	32.6641	Hyper
NC_019460.2	133383699	133383867	168	7	0.0918	0.6263	-0.5345	-32.7298	Hypo		NC_019460.2	179542314	179542463	149	13	0.6174	0.1678	0.4496	56.0954	Hyper
NC_019482.2	44562303	44562458	155	9	0.1022	0.6361	-0.5339	-44.4678	Hypo		NC_019477.2	35144813	35144962	149	5	0.7763	0.3266	0.4496	19.2243	Hyper
NC_019474.2	41751459	41751515	56	4	0.1017	0.6346	-0.5329	-16.4144	Hypo		NC_019477.2	26873076	26873185	109	12	0.6196	0.1689	0.4507	50.8286	Hyper
NC_019458.2	275038887	275038986	99	5	0.114	0.6468	-0.5328	-18.0011	Hypo		NC_019460.2	211172734	211172856	122	8	0.596	0.1447	0.4513	31.3155	Hyper
NC_019462.2	18934725	18934782	57	11	0.1475	0.6784	-0.5309	-58.8597	Hypo		NC_019461.2	117723013	117723067	54	5	0.5514	0.0997	0.4516	18.5601	Hyper
NC_019460.2	2773351	2773463	112	9	0.0848	0.6156	-0.5308	-48.7814	Hypo		NC_019468.2	55987746	55988038	292	17	0.5839	0.1323	0.4516	101.766	Hyper
NC_019474.2	67790542	67790606	64	11	0.1625	0.6924	-0.53	-55.5387	Hypo		NC_019467.2	11624612	11624689	77	6	0.5877	0.1361	0.4516	23.2988	Hyper
NC_019469.2	42201267	42201462	195	24	0.1762	0.7044	-0.5282	-160.534	Hypo		NC_019460.2	16507390	16507688	298	7	0.5491	0.0973	0.4517	27.0655	Hyper
NC_019474.2	51020817	51021016	199	9	0.1232	0.6514	-0.5281	-43.1648	Hypo		NC_019471.2	45209665	45209829	164	11	0.5844	0.1321	0.4523	48.8273	Hyper
NC_019478.2	45979049	45979131	82	4	0.0958	0.6228	-0.527	-15.8459	Hypo		NC_019472.2	77773171	77773274	103	8	0.5911	0.1388	0.4523	29.5706	Hyper
NC_019472.2	26176416	26176655	239	9	0.0887	0.6153	-0.5267	-40.8778	Hypo		NC_019465.2	88196520	88196692	172	13	0.5318	0.079	0.4527	69.448	Hyper
NC_019476.2	58909859	58909986	127	10	0.1804	0.7071	-0.5267	-48.1386	Hypo		NC_019460.2	469918	470004	86	8	0.5523	0.0984	0.4539	30.0251	Hyper
NC_019462.2	3150778	3150880	102	10	0.157	0.6829	-0.5259	-45.3611	Hypo		NC_019477.2	50439619	50439802	183	7	0.5425	0.0885	0.454	33.6106	Hyper
NC_019459.2	368753	368868	115	9	0.1522	0.6779	-0.5257	-39.4479	Hypo		NC_019475.2	58685096	58685151	55	5	0.5384	0.0843	0.4541	18.7306	Hyper
NC_019469.2	78693682	78693800	118	13	0.1427	0.6683	-0.5256	-66.6661	Hypo		NC_019469.2	48196213	48196304	91	4	0.5571	0.1029	0.4542	19.1978	Hyper
NC_019478.2	24599678	24599893	215	12	0.0891	0.6147	-0.5255	-73.8767	Hypo		NC_019480.2	57536671	57536744	73	12	0.643	0.1875	0.4555	47.9104	Hyper
NC_019460.2	7891103	7891296	193	7	0.1364	0.6618	-0.5254	-29.9898	Hypo		NC_019462.2	43008162	43008338	176	16	0.5859	0.1293	0.4566	88.2634	Hyper
NC_019460.2	208861622	208861734	112	10	0.1385	0.6638	-0.5253	-50.903	Hypo		NC_019462.2	13051890	13051952	62	6	0.5766	0.118	0.4586	19.4069	Hyper
NC_019476.2	59363003	59363141	138	8	0.1785	0.7037	-0.5252	-33.7376	Hypo		NC_019468.2	37270941	37271102	161	11	0.5632	0.1032	0.46	48.1656	Hyper
NC_019467.2	84522730	84522921	191	13	0.1081	0.6325	-0.5244	-68.4595	Hypo		NC_019476.2	53570062	53570149	87	7	0.5792	0.119	0.4603	26.8977	Hyper
NC_019469.2	55741873	55742021	148	12	0.1483	0.6723	-0.524	-59.4634	Hypo		NC_019471.2	58787148	58787214	66	4	0.5403	0.0794	0.461	13.6494	Hyper
NC_019479.2	50083218	50083368	150	16	0.1385	0.662	-0.5235	-94.0562	Hypo		NC_019468.2	34691676	34691764	88	6	0.5948	0.1333	0.4616	19.3615	Hyper
NC_019461.2	117332146	117332266	120	7	0.1625	0.6854	-0.5229	-29.1824	Hypo		NC_019468.2	58210333	58210540	207	15	0.5811	0.1193	0.4618	77.3996	Hyper
NC_019474.2	71905970	71906240	270	18	0.1155	0.6381	-0.5226	-128.944	Hypo		NC_019464.2	94095849	94096060	211	13	0.5909	0.1289	0.4619	65.5616	Hyper
NC_019460.2	133434003	133434084	81	5	0.1767	0.6984	-0.5217	-17.8391	Hypo		NC_019483.2	1161132	1161247	115	8	0.6251	0.1626	0.4625	27.5022	Hyper
NC_019469.2	42490373	42490438	65	6	0.1492	0.6707	-0.5215	-25.0453	Hypo		NC_019465.2	83585382	83585475	93	7	0.5521	0.0889	0.4633	25.0713	Hyper
NC_019476.2	60065161	60065275	114	7	0.1809	0.7023	-0.5214	-28.3333	Hypo		NC_019476.2	49681302	49681617	315	16	0.6566	0.1931	0.4635	73.1775	Hyper
NC_019469.2	73006557	73006657	100	5	0.1202	0.6403	-0.5201	-21.0856	Hypo		NC_019459.2	104202838	104202953	115	15	0.5759	0.1121	0.4638	71.1121	Hyper
NC_019459.2	31322274	31322375	101	6	0.095	0.6146	-0.5196	-23.9901	Hypo		NC_019476.2	1988494	1988592	98	7	0.594	0.1301	0.464	27.7206	Hyper
NC_019481.2	12870121	12870206	85	7	0.1709	0.6896	-0.5187	-31.2243	Hypo		NC_019462.2	14435948	14436024	76	9	0.5694	0.1053	0.4641	37.8017	Hyper
NC_019459.2	41703120	41703188	68	6	0.1268	0.6445	-0.5178	-20.9202	Hypo		NC_019462.2	4166973	4167138	165	7	0.5878	0.1234	0.4644	26.6151	Hyper
NC_019468.2	54078744	54078803	59	6	0.1188	0.6365	-0.5177	-24.1281	Hypo		NC_019471.2	13962979	13963156	177	8	0.7642	0.2997	0.4645	27.8219	Hyper
NC_019481.2	1613650	1613945	295	27	0.124	0.6414	-0.5174	-193.856	Hypo		NC_019460.2	136749312	136749406	94	6	0.5728	0.1075	0.4653	27.1867	Hyper
NC_019469.2	47341007	47341108	101	5	0.2168	0.734	-0.5173	-18.4633	Hypo		NC_019470.2	38220946	38221005	59	6	0.5874	0.1222	0.4653	25.4925	Hyper
NC_019483.2	5939191	5939438	247	10	0.1676	0.6847	-0.5171	-49.5562	Hypo		NC_019481.2	41652030	41652202	172	10	0.5944	0.1291	0.4653	40.6483	Hyper
NC_019483.2	38889754	38889864	110	8	0.1478	0.6647	-0.5169	-33.4985	Hypo		NC_019480.2	19818025	19818126	101	6	0.5978	0.132	0.4659	19.8042	Hyper
NC_019474.2	57231536	57231645	109	12	0.1625	0.6785	-0.516	-57.4188	Hypo		NC_019464.2	89049997	89050162	165	12	0.5988	0.1324	0.4664	51.6268	Hyper
NC_019460.2	1354495	1354713	218	12	0.0795	0.5953	-0.5158	-71.8958	Hypo		NC_019478.2	27881360	27881497	137	8	0.5535	0.0869	0.4666	33.473	Hyper
NC_019478.2	48513716	48513799	83	5	0.0917	0.6058	-0.5142	-20.0246	Hypo		NC_019474.2	18363388	18363478	90	9	0.6063	0.1391	0.4672	34.2181	Hyper
NC_019471.2	33501544	33501662	118	7	0.1161	0.6297	-0.5136	-28.3719	Hypo		NC_019460.2	2444100	2444214	114	7	0.5736	0.1058	0.4678	28.8888	Hyper
NC_019462.2	4434532	4434627	95	6	0.1244	0.6363	-0.5119	-23.2913	Hypo		NC_019464.2	39763248	39763308	60	4	0.5384	0.0703	0.468	13.7609	Hyper
NC_019460.2	1809462	1809605	143	9	0.1454	0.6567	-0.5113	-38.1513	Hypo		NC_019475.2	21616967	21617060	93	4	0.5712	0.1031	0.468	13.4305	Hyper
NC_019460.2	220864467	220864547	80	9	0.0848	0.5957	-0.5109	-44.5902	Hypo		NC_019480.2	3328631	3328760	129	7	0.5649	0.0966	0.4683	27.6143	Hyper
NC_019469.2	4409181	4409296	115	7	0.1519	0.6624	-0.5105	-29.1323	Hypo		NC_019471.2	1535594	1535724	130	11	0.6858	0.2171	0.4687	49.9158	Hyper
NC_019476.2	58338943	58339052	109	13	0.2187	0.729	-0.5102	-64.2588	Hypo		NC_019458.2	11367116	11367170	54	6	0.5912	0.1224	0.4688	19.895	Hyper
NC_019467.2	83933109	83933303	194	12	0.0872	0.597	-0.5098	-66.6671	Hypo		NC_019462.2	27403396	27403460	64	6	0.5766	0.1076	0.469	21.018	Hyper
NC_019481.2	34509739	34509839	100	5	0.1156	0.6238	-0.5082	-19.1565	Hypo		NC_019472.2	37783302	37783471	169	10	0.727	0.2572	0.4699	37.407	Hyper
NC_019464.2	96995586	96995720	134	5	0.118	0.6261	-0.5081	-18.323	Hypo		NC_019458.2	188718477	188718556	79	8	0.705	0.2349	0.4701	25.0162	Hyper
NC_019471.2	16069141	16069233	92	8	0.1637	0.6697	-0.506	-31.9554	Hypo		NC_019469.2	47420000	47420137	137	7	0.6351	0.1649	0.4702	27.768	Hyper
NC_019466.2	15475736	15475810	74	9	0.1334	0.6394	-0.506	-39.2103	Hypo		NC_019479.2	2207605	2207686	81	4	0.5292	0.059	0.4702	14.5714	Hyper
NC_019480.2	48418592	48418653	61	7	0.1118	0.6177	-0.5059	-31.6455	Hypo		NC_019479.2	42981520	42981633	113	11	0.603	0.1327	0.4703	48.5931	Hyper
NC_019459.2	3000148	3000232	84	8	0.1605	0.6663	-0.5059	-28.6077	Hypo		NC_019467.2	84273261	84273477	216	10	0.5771	0.1067	0.4704	46.686	Hyper
NC_019460.2	165341414	165341491	77	8	0.1485	0.6544	-0.5059	-31.8842	Hypo		NC_019466.2	23481374	23481464	90	7	0.5843	0.1136	0.4707	24.5867	Hyper
NC_019471.2	34702183	34702262	79	8	0.1232	0.629	-0.5058	-36.7315	Hypo		NC_019467.2	86149146	86149200	54	4	0.5494	0.0787	0.4707	14.0317	Hyper
NC_019459.2	117121998	117122086	88	7	0.1525	0.6573	-0.5049	-23.7668	Hypo		NC_019473.2	39396	39553	157	9	0.5129	0.0414	0.4715	58.1139	Hyper
NC_019473.2	31710924	31711013	89	4	0.0737	0.5784	-0.5047	-16.3709	Hypo		NC_019468.2	55964435	55964514	79	8	0.6055	0.1339	0.4716	28.8272	Hyper
NC_019460.2	138063317	138063439	122	8	0.1731	0.6776	-0.5045	-32.7218	Hypo		NC_019458.2	84950892	84950985	93	9	0.6494	0.1776	0.4718	31.4533	Hyper
NC_019464.2	5909038	5909117	79	5	0.0886	0.5923	-0.5036	-19.5848	Hypo		NC_019465.2	89822659	89822953	294	12	0.5437	0.0708	0.4729	65.3004	Hyper
NC_019470.2	53237272	53237349	77	10	0.1654	0.6686	-0.5032	-41.7956	Hypo		NC_019460.2	161962205	161963260	1055	14	0.5804	0.1071	0.4732	56.0483	Hyper
NC_019467.2	77885909	77886078	169	8	0.1314	0.6343	-0.5029	-31.7495	Hypo		NC_019458.2	190551743	190551900	157	11	0.6694	0.1959	0.4736	41.6033	Hyper
NC_019460.2	216707243	216707371	128	8	0.1631	0.6655	-0.5024	-35.8508	Hypo		NC_019460.2	100613977	100614087	110	9	0.5945	0.1191	0.4754	35.5181	Hyper
NC_019469.2	27736244	27736332	88	5	0.1081	0.6102	-0.5021	-18.8284	Hypo		NC_019465.2	16333608	16333889	281	9	0.6217	0.1463	0.4754	55.9983	Hyper
NC_019481.2	9292426	9292511	85	8	0.165	0.6671	-0.5021	-31.6501	Hypo		NC_019480.2	54701352	54701475	123	8	0.5875	0.1118	0.4757	34.1311	Hyper
NC_019471.2	10903721	10903786	65	8	0.1557	0.6576	-0.5019	-31.3581	Hypo		NC_019481.2	29730130	29730283	153	10	0.6447	0.1688	0.4759	43.259	Hyper
NC_019471.2	12595826	12595882	56	6	0.1233	0.6235	-0.5002	-23.1558	Hypo		NC_019468.2	55291100	55291249	149	6	0.706	0.2299	0.4761	19.9234	Hyper
NC_019471.2	38456617	38456668	51	4	0.1143	0.6141	-0.4998	-13.7834	Hypo		NC_019464.2	92957746	92957817	71	4	0.5384	0.0621	0.4762	14.3575	Hyper
NC_019459.2	246377455	246377553	98	16	0.1565	0.6553	-0.4988	-80.4061	Hypo		NC_019471.2	61011665	61011766	101	7	0.6246	0.1483	0.4763	24.3718	Hyper
NC_019458.2	2615675	2615827	152	15	0.1095	0.6081	-0.4986	-78.3543	Hypo		NC_019458.2	2094618	2094784	166	17	0.6834	0.2068	0.4766	75.1868	Hyper
NC_019468.2	33433763	33433937	174	18	0.1522	0.6505	-0.4983	-104.405	Hypo		NC_019469.2	811974	812031	57	6	0.5954	0.1185	0.4769	23.7767	Hyper
NC_019462.2	15825330	15825385	55	6	0.0715	0.5688	-0.4972	-28.8575	Hypo		NC_019466.2	75337693	75337772	79	6	0.563	0.0853	0.4778	24.5134	Hyper
NC_019459.2	2230629	2230720	91	6	0.0738	0.57	-0.4962	-23.2174	Hypo		NC_019462.2	16002099	16002245	146	10	0.5759	0.098	0.4779	46.618	Hyper
NC_019478.2	46329848	46329934	86	5	0.1106	0.6058	-0.4953	-18.0855	Hypo		NC_019460.2	1399525	1399632	107	5	0.5761	0.098	0.4781	20.3117	Hyper
NC_019481.2	41284506	41284670	164	18	0.1423	0.6362	-0.4938	-119.972	Hypo		NC_019479.2	49449236	49449349	113	8	0.7263	0.248	0.4783	32.5987	Hyper
NC_019459.2	2592138	2592215	77	5	0.1314	0.6249	-0.4935	-14.6816	Hypo		NC_019483.2	466806	466889	83	11	0.5879	0.1095	0.4785	48.8788	Hyper
NC_019470.2	64773274	64773362	88	9	0.2301	0.7229	-0.4928	-34.7618	Hypo		NC_019467.2	74754443	74754516	73	8	0.6063	0.1278	0.4785	35.4301	Hyper
NC_019459.2	139572131	139572219	88	9	0.1522	0.6445	-0.4923	-32.6083	Hypo		NC_019478.2	46362484	46362588	104	7	0.5975	0.1183	0.4793	25.97	Hyper
NC_019459.2	70091895	70091981	86	9	0.1522	0.6445	-0.4923	-32.6082	Hypo		NC_019459.2	49810552	49810649	97	6	0.6806	0.2011	0.4795	18.5872	Hyper
NC_019460.2	214267397	214267469	72	8	0.1181	0.6102	-0.4921	-32.0216	Hypo		NC_019473.2	4240645	4240710	65	11	0.5972	0.1172	0.48	48.7756	Hyper
NC_019463.2	114670345	114670409	64	4	0.1212	0.6128	-0.4916	-12.6701	Hypo		NC_019471.2	62199901	62199962	61	6	0.564	0.0839	0.4801	24.8443	Hyper
NC_019469.2	26978136	26978228	92	4	0.1515	0.6428	-0.4913	-13.9544	Hypo		NC_019478.2	48760882	48761057	175	14	0.5687	0.0882	0.4805	78.3338	Hyper
NC_019477.2	50309877	50310124	247	13	0.0889	0.5802	-0.4913	-64.6202	Hypo		NC_019478.2	31653559	31653745	186	10	0.5664	0.0852	0.4812	52.5562	Hyper
NC_019459.2	89129478	89129565	87	7	0.0876	0.5788	-0.4913	-28.5568	Hypo		NC_019478.2	32194628	32194687	59	6	0.5857	0.1044	0.4813	22.407	Hyper
NC_019472.2	35174452	35174552	100	9	0.142	0.6332	-0.4912	-35.4922	Hypo		NC_019470.2	79107762	79108038	276	14	0.5504	0.0689	0.4815	87.4369	Hyper
NC_019460.2	7775739	7775823	84	7	0.1964	0.6872	-0.4909	-29.326	Hypo		NC_019472.2	72795653	72795750	97	8	0.6021	0.1201	0.482	30.5163	Hyper
NC_019458.2	104978381	104978435	54	6	0.142	0.6322	-0.4902	-18.2558	Hypo		NC_019470.2	81646821	81646963	142	10	0.6603	0.1779	0.4823	47.375	Hyper
NC_019474.2	69273248	69273350	102	13	0.1596	0.6493	-0.4898	-69.3354	Hypo		NC_019476.2	57820022	57823913	3891	20	0.6225	0.1401	0.4824	127.525	Hyper
NC_019481.2	61334	61403	69	5	0.073	0.5624	-0.4895	-20.6157	Hypo		NC_019471.2	13723238	13723328	90	9	0.6378	0.1551	0.4827	34.4596	Hyper
NC_019474.2	71715148	71718645	3497	18	0.1667	0.6557	-0.489	-72.5987	Hypo		NC_019468.2	18805004	18805103	99	9	0.5906	0.1079	0.4827	37.0241	Hyper
NC_019484.2	77173216	77173315	99	6	0.2679	0.7569	-0.489	-21.3029	Hypo		NC_019467.2	36937700	36937773	73	6	0.5688	0.0851	0.4838	22.1999	Hyper
NC_019468.2	57475008	57475143	135	7	0.1292	0.618	-0.4888	-26.1491	Hypo		NC_019469.2	41893166	41893261	95	6	0.5949	0.1098	0.4851	22.4406	Hyper
NC_019468.2	52428948	52429049	101	8	0.1577	0.6463	-0.4886	-29.7852	Hypo		NC_019472.2	78021368	78021481	113	10	0.6176	0.1321	0.4855	41.1253	Hyper
NC_019474.2	44753379	44753468	89	8	0.1748	0.6629	-0.4882	-30.7659	Hypo		NC_019478.2	46945584	46945677	93	6	0.6043	0.1184	0.4859	21.326	Hyper
NC_019473.2	6284728	6284819	91	8	0.0951	0.5827	-0.4877	-32.9317	Hypo		NC_019478.2	38936091	38936185	94	6	0.5991	0.1126	0.4865	22.2636	Hyper
NC_019460.2	56772406	56772465	59	6	0.0779	0.5652	-0.4873	-25.508	Hypo		NC_019478.2	17359005	17359109	104	17	0.6656	0.1788	0.4868	86.0948	Hyper
NC_019475.2	68172826	68172916	90	7	0.1466	0.6333	-0.4867	-25.5944	Hypo		NC_019468.2	50680609	50680695	86	8	0.6055	0.1178	0.4877	30.9927	Hyper
NC_019481.2	16797963	16798051	88	5	0.1298	0.6164	-0.4866	-17.4694	Hypo		NC_019470.2	56952728	56952835	107	6	0.5838	0.096	0.4878	26.5045	Hyper
NC_019481.2	2061796	2061973	177	11	0.287	0.7734	-0.4864	-47.958	Hypo		NC_019462.2	2369737	2369859	122	8	0.6009	0.1127	0.4882	31.4015	Hyper
NC_019460.2	81017384	81017492	108	7	0.1133	0.5994	-0.4861	-27.3442	Hypo		NC_019460.2	178632246	178632330	84	10	0.5892	0.1008	0.4884	50.3052	Hyper
NC_019460.2	1156151	1156278	127	12	0.1007	0.5857	-0.485	-59.2389	Hypo		NC_019460.2	221095968	221096064	96	8	0.6535	0.1648	0.4886	29.6678	Hyper
NC_019464.2	77488390	77488650	260	19	0.1448	0.6294	-0.4846	-126.593	Hypo		NC_019459.2	247089708	247089809	101	6	0.6286	0.1397	0.4889	18.5833	Hyper
NC_019477.2	13794214	13794276	62	4	0.0898	0.5742	-0.4844	-13.0752	Hypo		NC_019461.2	103023671	103023758	87	7	0.6274	0.1384	0.489	23.3782	Hyper
NC_019478.2	43542265	43542353	88	6	0.103	0.5867	-0.4837	-21.6787	Hypo		NC_019468.2	34226717	34226932	215	14	0.6262	0.1372	0.489	71.0539	Hyper
NC_019476.2	58656172	58656546	374	19	0.1626	0.6462	-0.4837	-92.4239	Hypo		NC_019463.2	45878014	45878114	100	5	0.7026	0.2131	0.4895	15.0295	Hyper
NC_019467.2	66047205	66047305	100	5	0.1028	0.5858	-0.483	-17.2244	Hypo		NC_019469.2	25037110	25037179	69	7	0.5947	0.105	0.4897	28.4898	Hyper
NC_019461.2	117296702	117296792	90	10	0.1763	0.6591	-0.4828	-38.3299	Hypo		NC_019481.2	39187444	39187527	83	9	0.6503	0.1605	0.4897	35.9679	Hyper
NC_019459.2	136495540	136495593	53	4	0.0801	0.5627	-0.4827	-13.0525	Hypo		NC_019461.2	116282140	116282232	92	11	0.6614	0.1714	0.49	45.133	Hyper
NC_019478.2	42941151	42941242	91	4	0.0608	0.5427	-0.4818	-15.203	Hypo		NC_019466.2	78683355	78683613	258	31	0.5934	0.1034	0.49	251.283	Hyper
NC_019470.2	44200992	44203644	2652	11	0.1415	0.6227	-0.4812	-41.0226	Hypo		NC_019461.2	13097423	13097550	127	6	0.5759	0.0852	0.4907	23.0039	Hyper
NC_019480.2	57194478	57194567	89	7	0.1436	0.6246	-0.481	-24.7147	Hypo		NC_019467.2	76446758	76446870	112	9	0.5524	0.0617	0.4907	47.2837	Hyper
NC_019460.2	212211976	212212028	52	6	0.106	0.5857	-0.4797	-21.714	Hypo		NC_019460.2	217785451	217785584	133	12	0.6474	0.1567	0.4907	55.7565	Hyper
NC_019474.2	60918395	60918571	176	10	0.194	0.673	-0.479	-44.3553	Hypo		NC_019467.2	75945483	75945643	160	7	0.5501	0.0593	0.4908	31.7928	Hyper
NC_019459.2	236433271	236433356	85	4	0.0848	0.5627	-0.478	-12.8117	Hypo		NC_019474.2	45744534	45744609	75	5	0.7784	0.2869	0.4914	17.0956	Hyper
NC_019460.2	5290379	5290448	69	6	0.0875	0.5652	-0.4777	-24.4744	Hypo		NC_019474.2	3659827	3659880	53	10	0.6938	0.2022	0.4917	43.5276	Hyper
NC_019481.2	25630842	25630926	84	6	0.3189	0.7955	-0.4767	-20.5433	Hypo		NC_019464.2	5267650	5267722	72	6	0.582	0.0899	0.4921	23.4064	Hyper
NC_019460.2	23993853	23993979	126	6	0.0887	0.5652	-0.4765	-24.2958	Hypo		NC_019460.2	220907731	220907790	59	7	0.5675	0.0745	0.493	31.3347	Hyper
NC_019461.2	118886113	118886234	121	6	0.1936	0.6701	-0.4764	-22.9348	Hypo		NC_019468.2	56908660	56908856	196	15	0.5751	0.0815	0.4937	101.657	Hyper
NC_019468.2	7856482	7856695	213	10	0.2428	0.7185	-0.4756	-38.5346	Hypo		NC_019463.2	104763728	104763818	90	9	0.7568	0.2615	0.4952	31.0701	Hyper
NC_019462.2	58767943	58768022	79	8	0.1206	0.596	-0.4754	-33.2153	Hypo		NC_019461.2	111350727	111350821	94	11	0.6418	0.1462	0.4956	48.1123	Hyper
NC_019472.2	50478949	50479043	94	8	0.1283	0.6037	-0.4754	-29.4672	Hypo		NC_019481.2	34462083	34462289	206	17	0.6571	0.1616	0.4956	93.0805	Hyper
NC_019475.2	18774174	18774269	95	14	0.182	0.6563	-0.4743	-64.1379	Hypo		NC_019464.2	42400774	42400860	86	7	0.6228	0.127	0.4958	25.9343	Hyper
NC_019474.2	70908029	70908109	80	10	0.2757	0.7498	-0.4742	-38.6551	Hypo		NC_019482.2	42760443	42760526	83	6	0.5842	0.0884	0.4958	24.7449	Hyper
NC_019481.2	1009686	1009757	71	5	0.0581	0.532	-0.4739	-21.3006	Hypo		NC_019470.2	57109695	57109822	127	8	0.6568	0.1608	0.4959	30.8746	Hyper
NC_019474.2	70849905	70850070	165	15	0.0999	0.5737	-0.4738	-83.2673	Hypo		NC_019469.2	73244037	73244173	136	5	0.5933	0.0973	0.496	19.3613	Hyper
NC_019460.2	212961802	212961917	115	8	0.1369	0.6102	-0.4733	-29.0614	Hypo		NC_019463.2	112682365	112682443	78	4	0.7156	0.2191	0.4965	11.3758	Hyper
NC_019460.2	223097661	223097805	144	13	0.0931	0.5665	-0.4733	-69.2391	Hypo		NC_019479.2	43106079	43106181	102	6	0.6811	0.1839	0.4972	21.8605	Hyper
NC_019476.2	45539198	45539270	72	4	0.2682	0.7408	-0.4727	-13.2785	Hypo		NC_019474.2	67883640	67883838	198	5	0.6102	0.1129	0.4973	17.6718	Hyper
NC_019460.2	212624274	212624388	114	11	0.1294	0.6017	-0.4723	-52.4459	Hypo		NC_019480.2	4597376	4597526	150	6	0.5843	0.087	0.4973	24.624	Hyper
NC_019478.2	48937709	48937817	108	6	0.1409	0.6131	-0.4722	-26.3445	Hypo		NC_019477.2	41907404	41907487	83	10	0.6623	0.1646	0.4977	40.977	Hyper
NC_019475.2	7203667	7203772	105	11	0.2477	0.7196	-0.4719	-42.9202	Hypo		NC_019480.2	57739436	57739554	118	11	0.7366	0.239	0.4977	47.1845	Hyper
NC_019461.2	117697782	117698142	360	19	0.1531	0.6248	-0.4717	-107.891	Hypo		NC_019460.2	132897888	132897970	82	11	0.7024	0.2041	0.4982	56.1116	Hyper
NC_019478.2	34540447	34540544	97	7	0.0989	0.5697	-0.4708	-27.0547	Hypo		NC_019459.2	55276111	55276213	102	8	0.8568	0.3581	0.4987	41.3465	Hyper
NC_019484.2	1227308	1227420	112	11	0.1478	0.6185	-0.4706	-46.3217	Hypo		NC_019476.2	16691782	16691861	79	4	0.655	0.156	0.499	14.0943	Hyper
NC_019475.2	63913534	63913606	72	5	0.1419	0.6114	-0.4695	-15.8721	Hypo		NC_019461.2	85298931	85299035	104	5	0.6319	0.1328	0.4991	17.5376	Hyper
NC_019462.2	40746126	40746197	71	8	0.1315	0.6009	-0.4694	-28.7537	Hypo		NC_019467.2	83452630	83452681	51	5	0.59	0.0908	0.4992	18.6418	Hyper
NC_019464.2	89648333	89648402	69	8	0.1392	0.6083	-0.4691	-28.7306	Hypo		NC_019458.2	18369483	18369557	74	6	0.6493	0.1489	0.5004	18.979	Hyper
NC_019460.2	81513564	81513638	74	6	0.1169	0.5857	-0.4688	-20.1144	Hypo		NC_019481.2	609616	609675	59	10	0.6693	0.1688	0.5006	46.6048	Hyper
NC_019484.2	77760903	77761005	102	8	0.1619	0.6303	-0.4684	-29.0729	Hypo		NC_019478.2	8027765	8027853	88	7	0.6006	0.0998	0.5007	31.2324	Hyper
NC_019460.2	6213675	6213793	118	11	0.1454	0.6136	-0.4682	-51.2643	Hypo		NC_019458.2	260110998	260111115	117	5	0.7008	0.1999	0.5009	17.6498	Hyper
NC_019462.2	18514855	18515023	168	14	0.0967	0.564	-0.4673	-80.4959	Hypo		NC_019473.2	71457940	71458122	182	15	0.6105	0.1091	0.5014	89.46	Hyper
NC_019479.2	38390324	38390378	54	7	0.0756	0.5426	-0.467	-30.8825	Hypo		NC_019469.2	77703840	77703987	147	12	0.6468	0.1447	0.5021	55.0892	Hyper
NC_019471.2	6633132	6633228	96	6	0.1224	0.5893	-0.4669	-19.9533	Hypo		NC_019468.2	52664707	52664857	150	7	0.6219	0.1193	0.5026	27.3967	Hyper
NC_019469.2	54916662	54916793	131	8	0.0937	0.5605	-0.4669	-33.1416	Hypo		NC_019482.2	29515201	29515279	78	5	0.6037	0.101	0.5027	19.0724	Hyper
NC_019462.2	41199536	41199630	94	8	0.1315	0.5983	-0.4668	-28.9076	Hypo		NC_019461.2	116097565	116097635	70	5	0.6363	0.1328	0.5035	15.3838	Hyper
NC_019482.2	34692950	34693019	69	5	0.0496	0.5161	-0.4665	-20.4906	Hypo		NC_019462.2	41287044	41287196	152	15	0.6541	0.15	0.5041	84.1447	Hyper
NC_019464.2	98012544	98012639	95	14	0.1774	0.6429	-0.4654	-61.6104	Hypo		NC_019473.2	66614667	66614957	290	7	0.5523	0.0482	0.5041	35.9311	Hyper
NC_019458.2	1524458	1524541	83	9	0.0984	0.5633	-0.4649	-31.9341	Hypo		NC_019465.2	10447451	10447537	86	6	0.5877	0.0818	0.5059	23.1823	Hyper
NC_019470.2	76532804	76532905	101	5	0.3159	0.7802	-0.4644	-15.0689	Hypo		NC_019464.2	97841251	97841318	67	9	0.5743	0.068	0.5062	47.504	Hyper
NC_019480.2	19849851	19850125	274	11	0.0673	0.5316	-0.4643	-55.6394	Hypo		NC_019479.2	47262516	47262603	87	5	0.5931	0.0869	0.5062	19.3174	Hyper
NC_019468.2	55512835	55512931	96	6	0.1299	0.594	-0.464	-19.4681	Hypo		NC_019478.2	44957803	44957915	112	7	0.5849	0.0784	0.5065	31.6611	Hyper
NC_019469.2	78094120	78094281	161	10	0.1465	0.6102	-0.4637	-41.6313	Hypo		NC_019468.2	53658633	53658730	97	6	0.6401	0.1333	0.5068	22.3534	Hyper
NC_019484.2	5406631	5406694	63	7	0.1522	0.6158	-0.4636	-27.3886	Hypo		NC_019479.2	38229652	38229782	130	6	0.5894	0.0824	0.507	24.5829	Hyper
NC_019479.2	42309528	42309688	160	7	0.0725	0.5359	-0.4634	-31.4551	Hypo		NC_019460.2	223186247	223186384	137	13	0.7622	0.2541	0.508	66.886	Hyper
NC_019471.2	5956613	5957017	404	18	0.1171	0.5804	-0.4632	-108.318	Hypo		NC_019458.2	15870644	15870735	91	5	0.6519	0.1433	0.5086	15.198	Hyper
NC_019460.2	3540474	3540555	81	6	0.1226	0.5857	-0.4631	-20.0682	Hypo		NC_019481.2	33736701	33736771	70	7	0.6361	0.1276	0.5086	28.9325	Hyper
NC_019460.2	201441008	201441106	98	6	0.1227	0.5857	-0.463	-19.8557	Hypo		NC_019468.2	27058346	27058403	57	6	0.6165	0.1078	0.5087	24.7355	Hyper
NC_019459.2	103770744	103770827	83	11	0.1298	0.5926	-0.4628	-43.2573	Hypo		NC_019475.2	28162188	28162244	56	8	0.6766	0.1678	0.5088	33.8501	Hyper
NC_019460.2	2456579	2456708	129	11	0.0804	0.5427	-0.4624	-57.1646	Hypo		NC_019484.2	110379586	110379668	82	5	0.6146	0.1055	0.5091	17.6592	Hyper
NC_019469.2	73415160	73415285	125	12	0.1577	0.6201	-0.4624	-52.9118	Hypo		NC_019471.2	14085785	14085880	95	9	0.6642	0.1551	0.5092	37.5659	Hyper
NC_019459.2	86938244	86938360	116	12	0.1522	0.6138	-0.4616	-46.3865	Hypo		NC_019483.2	38800244	38800646	402	9	0.7349	0.2254	0.5095	35.3108	Hyper
NC_019481.2	39046964	39047061	97	7	0.1217	0.5831	-0.4614	-24.7479	Hypo		NC_019468.2	44074465	44074601	136	9	0.5906	0.0807	0.5099	43.8911	Hyper
NC_019465.2	87973178	87973263	85	13	0.1728	0.6339	-0.4611	-54.8355	Hypo		NC_019467.2	53742635	53742714	79	4	0.7491	0.2391	0.5099	13.8387	Hyper
NC_019469.2	78831263	78831343	80	8	0.1565	0.6164	-0.4599	-27.4491	Hypo		NC_019478.2	49313374	49313570	196	17	0.6974	0.1871	0.5103	102.586	Hyper
NC_019472.2	52634681	52634757	76	4	0.102	0.5617	-0.4598	-15.1566	Hypo		NC_019464.2	62241664	62241727	63	7	0.6228	0.1124	0.5104	27.7315	Hyper
NC_019468.2	53934771	53934834	63	6	0.0833	0.5429	-0.4596	-25.8153	Hypo		NC_019468.2	34733697	34733766	69	7	0.6466	0.136	0.5106	27.0771	Hyper
NC_019460.2	3690463	3690526	63	8	0.2755	0.7346	-0.4591	-26.9774	Hypo		NC_019469.2	39814089	39814168	79	4	0.831	0.3203	0.5107	14.4885	Hyper
NC_019473.2	19825192	19825287	95	7	0.0602	0.5188	-0.4586	-32.4308	Hypo		NC_019467.2	86239034	86239093	59	11	0.6314	0.1199	0.5115	50.768	Hyper
NC_019458.2	102800548	102800636	88	9	0.1326	0.5911	-0.4585	-29.7951	Hypo		NC_019468.2	15130274	15130373	99	5	0.6341	0.1211	0.513	18.2132	Hyper
NC_019481.2	34852079	34852159	80	11	0.1795	0.638	-0.4585	-44.8382	Hypo		NC_019479.2	40384552	40384687	135	7	0.6888	0.1756	0.5132	32.2736	Hyper
NC_019479.2	49271824	49271904	80	6	0.117	0.5741	-0.4571	-19.7807	Hypo		NC_019468.2	57168657	57168777	120	10	0.657	0.1431	0.5139	43.908	Hyper
NC_019460.2	1593357	1593475	118	15	0.1375	0.5944	-0.4569	-76.8948	Hypo		NC_019475.2	66903886	66903977	91	7	0.6472	0.1321	0.5151	28.4671	Hyper
NC_019470.2	45646294	45646410	116	12	0.1275	0.5838	-0.4563	-52.5187	Hypo		NC_019479.2	49131686	49131799	113	7	0.6217	0.1061	0.5157	31.6794	Hyper
NC_019460.2	4365670	4365808	138	8	0.1005	0.5545	-0.454	-32.2895	Hypo		NC_019472.2	33809512	33809671	159	25	0.6693	0.1531	0.5162	172.531	Hyper
NC_019484.2	34768946	34769103	157	9	0.2014	0.6555	-0.454	-39.983	Hypo		NC_019469.2	3514604	3514698	94	5	0.6414	0.1241	0.5173	18.8772	Hyper
NC_019482.2	43292019	43292116	97	9	0.2946	0.7474	-0.4528	-35.8284	Hypo		NC_019474.2	5920621	5920759	138	8	0.6634	0.145	0.5184	34.3532	Hyper
NC_019466.2	16171390	16171513	123	9	0.1499	0.6026	-0.4528	-31.9433	Hypo		NC_019459.2	234941506	234941598	92	11	0.6942	0.1758	0.5184	47.3376	Hyper
NC_019458.2	200863394	200863541	147	10	0.1186	0.5713	-0.4527	-34.7873	Hypo		NC_019471.2	5741676	5741765	89	8	0.6653	0.1463	0.519	33.1337	Hyper
NC_019481.2	41404768	41404845	77	11	0.1553	0.6074	-0.452	-44.7983	Hypo		NC_019468.2	5133304	5133393	89	10	0.6868	0.1669	0.5198	43.8499	Hyper
NC_019479.2	24150669	24150756	87	5	0.2683	0.7199	-0.4516	-14.6658	Hypo		NC_019484.2	988906	988995	89	10	0.6475	0.1268	0.5207	50.609	Hyper
NC_019462.2	22616128	22616223	95	7	0.0799	0.5309	-0.451	-33.541	Hypo		NC_019473.2	65887756	65887908	152	7	0.5754	0.0545	0.521	36.45	Hyper
NC_019480.2	2333112	2333167	55	10	0.276	0.7262	-0.4502	-35.339	Hypo		NC_019484.2	78085953	78086039	86	6	0.618	0.0971	0.521	29.6416	Hyper
NC_019460.2	217839419	217839613	194	12	0.1178	0.568	-0.4502	-57.4488	Hypo		NC_019473.2	62251066	62251279	213	15	0.568	0.046	0.522	106.498	Hyper
NC_019471.2	7547103	7547203	100	10	0.1715	0.6211	-0.4496	-38.2344	Hypo		NC_019464.2	16453339	16453479	140	8	0.6064	0.0832	0.5232	38.393	Hyper
NC_019478.2	41679184	41679276	92	6	0.1351	0.5841	-0.449	-20.1578	Hypo		NC_019458.2	10806563	10806623	60	5	0.6836	0.1598	0.5238	15.5057	Hyper
NC_019481.2	326817	326929	112	7	0.1351	0.5831	-0.4481	-23.2098	Hypo		NC_019471.2	48455067	48455154	87	5	0.6034	0.0794	0.5241	21.3388	Hyper
NC_019484.2	43881	43975	94	8	0.1408	0.588	-0.4472	-29.3403	Hypo		NC_019473.2	70503067	70503138	71	8	0.6345	0.1093	0.5252	34.3688	Hyper
NC_019460.2	222438056	222438147	91	7	0.1217	0.5687	-0.4469	-23.0814	Hypo		NC_019464.2	97511579	97511662	83	6	0.6502	0.1244	0.5258	24.0735	Hyper
NC_019474.2	71681457	71681587	130	22	0.2364	0.6825	-0.4462	-119.744	Hypo		NC_019460.2	211818299	211818444	145	11	0.6342	0.108	0.5262	64.9241	Hyper
NC_019466.2	13262907	13263021	114	11	0.1356	0.5812	-0.4456	-46.2446	Hypo		NC_019458.2	4991763	4991867	104	6	0.6635	0.1366	0.5269	21.3552	Hyper
NC_019484.2	390460	390579	119	16	0.1322	0.5766	-0.4443	-82.6179	Hypo		NC_019474.2	61956511	61956609	98	9	0.6409	0.112	0.529	43.6245	Hyper
NC_019460.2	103350381	103350499	118	7	0.1088	0.553	-0.4442	-25.837	Hypo		NC_019461.2	102126054	102126154	100	5	0.702	0.1721	0.5299	17.9466	Hyper
NC_019460.2	121418882	121418956	74	7	0.3145	0.7587	-0.4442	-21.7458	Hypo		NC_019464.2	73773718	73773915	197	10	0.7462	0.2163	0.53	48.3772	Hyper
NC_019475.2	63799849	63799969	120	10	0.1304	0.5744	-0.4441	-39.747	Hypo		NC_019482.2	42398990	42399057	67	7	0.6257	0.0953	0.5304	32.6067	Hyper
NC_019463.2	113430728	113430879	151	16	0.2164	0.6603	-0.4439	-62.2653	Hypo		NC_019458.2	213274349	213274449	100	4	0.6635	0.1327	0.5308	12.2368	Hyper
NC_019468.2	41116730	41117010	280	10	0.1042	0.5475	-0.4433	-49.8334	Hypo		NC_019471.2	15619020	15619184	164	16	0.6916	0.1598	0.5317	96.5615	Hyper
NC_019458.2	269957915	269958101	186	12	0.1109	0.5538	-0.4428	-44.7212	Hypo		NC_019481.2	33793884	33793987	103	9	0.6849	0.1532	0.5317	42.6104	Hyper
NC_019462.2	9810302	9810447	145	9	0.2129	0.6553	-0.4424	-33.1438	Hypo		NC_019469.2	47802754	47802852	98	4	0.634	0.1017	0.5323	15.5664	Hyper
NC_019481.2	574625	574761	136	11	0.0701	0.5125	-0.4424	-55.4505	Hypo		NC_019471.2	54060221	54060277	56	8	0.6527	0.12	0.5327	36.1997	Hyper
NC_019465.2	88704598	88704721	123	8	0.0771	0.5191	-0.442	-30.9611	Hypo		NC_019467.2	84461480	84461570	90	8	0.6686	0.1343	0.5342	34.4569	Hyper
NC_019468.2	33753233	33753327	94	8	0.1657	0.6076	-0.4419	-29.3728	Hypo		NC_019461.2	51004705	51004806	101	8	0.6771	0.1428	0.5343	32.7907	Hyper
NC_019475.2	32910515	32910585	70	5	0.3215	0.7633	-0.4418	-16.6808	Hypo		NC_019459.2	247882700	247882844	144	8	0.6923	0.1575	0.5348	31.3462	Hyper
NC_019468.2	22411884	22412006	122	7	0.1177	0.5592	-0.4415	-22.8738	Hypo		NC_019458.2	31911003	31911058	55	5	0.6519	0.1167	0.5352	17.0515	Hyper
NC_019482.2	31569058	31569148	90	9	0.1317	0.5731	-0.4414	-34.3467	Hypo		NC_019476.2	59989778	59992033	2255	11	0.7503	0.215	0.5353	51.1126	Hyper
NC_019470.2	34081083	34081226	143	10	0.1139	0.5553	-0.4414	-41.1708	Hypo		NC_019473.2	71015252	71015335	83	6	0.6219	0.0862	0.5357	26.4655	Hyper
NC_019464.2	9414520	9414576	56	6	0.1306	0.5714	-0.4408	-18.2061	Hypo		NC_019477.2	7249074	7249160	86	10	0.7023	0.1646	0.5377	47.7645	Hyper
NC_019458.2	15991302	15991373	71	8	0.1309	0.5709	-0.44	-27.5522	Hypo		NC_019464.2	75004285	75004378	93	12	0.6882	0.1502	0.538	59.7558	Hyper
NC_019462.2	17136169	17136300	131	11	0.1468	0.5865	-0.4397	-41.9824	Hypo		NC_019478.2	42292668	42292755	87	11	0.6853	0.1465	0.5388	54.7698	Hyper
NC_019479.2	47972196	47972264	68	7	0.1163	0.5558	-0.4395	-23.1358	Hypo		NC_019479.2	46747894	46747965	71	6	0.6222	0.0824	0.5398	27.4244	Hyper
NC_019460.2	19243175	19243310	135	8	0.1682	0.6071	-0.4389	-31.6365	Hypo		NC_019472.2	64394806	64394888	82	8	0.6832	0.1416	0.5416	35.876	Hyper
NC_019476.2	51218255	51218384	129	10	0.1632	0.6019	-0.4388	-37.7418	Hypo		NC_019460.2	1381534	1381614	80	9	0.6386	0.0969	0.5417	49.0617	Hyper
NC_019460.2	211229447	211229631	184	11	0.1561	0.593	-0.4368	-55.2431	Hypo		NC_019477.2	3362126	3362254	128	8	0.7093	0.1664	0.5429	34.6218	Hyper
NC_019469.2	73502750	73502825	75	7	0.1956	0.632	-0.4364	-25.9035	Hypo		NC_019471.2	12130468	12130595	127	6	0.6425	0.0993	0.5431	26.7012	Hyper
NC_019477.2	49731558	49731647	89	9	0.0757	0.5117	-0.436	-32.99	Hypo		NC_019462.2	13959592	13959725	133	17	0.6743	0.1312	0.5431	108.551	Hyper
NC_019468.2	61684285	61684364	79	8	0.1353	0.5698	-0.4344	-30.418	Hypo		NC_019479.2	49627226	49627303	77	11	0.6658	0.1219	0.5439	56.1236	Hyper
NC_019459.2	247365708	247365782	74	8	0.1858	0.6199	-0.4341	-29.2804	Hypo		NC_019479.2	17865387	17865479	92	6	0.6547	0.1105	0.5442	26.1446	Hyper
NC_019461.2	116257279	116258888	1609	43	0.1517	0.5857	-0.434	-243.086	Hypo		NC_019466.2	13394400	13394482	82	6	0.6382	0.0935	0.5446	23.392	Hyper
NC_019468.2	6498317	6498372	55	6	0.0628	0.4964	-0.4336	-23.2587	Hypo		NC_019473.2	37529486	37529575	89	7	0.6056	0.0609	0.5447	35.8158	Hyper
NC_019466.2	15826802	15826857	55	5	0.1822	0.6149	-0.4326	-15.5308	Hypo		NC_019458.2	262284539	262284841	302	20	0.7364	0.1897	0.5467	119.355	Hyper
NC_019482.2	7575942	7575997	55	6	0.0865	0.5191	-0.4325	-22.5635	Hypo		NC_019460.2	219702474	219702541	67	4	0.6261	0.0788	0.5474	16.7699	Hyper
NC_019481.2	438766	438878	112	10	0.1482	0.5798	-0.4317	-37.3051	Hypo		NC_019462.2	14032787	14032939	152	5	0.6452	0.0962	0.549	18.8038	Hyper
NC_019472.2	94112	94261	149	7	0.1251	0.5564	-0.4313	-26.0925	Hypo		NC_019480.2	7483152	7483243	91	5	0.6946	0.1444	0.5502	22.1693	Hyper
NC_019479.2	48770215	48770329	114	10	0.124	0.5551	-0.4311	-42.1277	Hypo		NC_019467.2	16578453	16578519	66	9	0.7382	0.1879	0.5503	42.1031	Hyper
NC_019472.2	24047817	24047911	94	11	0.1662	0.5969	-0.4307	-43.8106	Hypo		NC_019468.2	41212301	41212427	126	4	0.6235	0.0729	0.5505	16.9747	Hyper
NC_019470.2	41523528	41523609	81	4	0.1405	0.5709	-0.4305	-14.6648	Hypo		NC_019460.2	162582877	162582944	67	7	0.668	0.1146	0.5535	29.5536	Hyper
NC_019463.2	113743720	113744022	302	15	0.1042	0.5337	-0.4294	-65.9888	Hypo		NC_019458.2	260656309	260656410	101	5	0.6791	0.1251	0.554	18.7951	Hyper
NC_019471.2	10852375	10852487	112	9	0.1524	0.5807	-0.4283	-31.7988	Hypo		NC_019479.2	18108217	18108286	69	8	0.6696	0.1139	0.5557	39.1555	Hyper
NC_019481.2	40551044	40551136	92	15	0.1989	0.6272	-0.4283	-74.5064	Hypo		NC_019466.2	25307366	25307473	107	9	0.65	0.0935	0.5564	47.8912	Hyper
NC_019460.2	103786738	103786801	63	5	0.3069	0.7346	-0.4277	-16.13	Hypo		NC_019470.2	61161024	61161209	185	12	0.6996	0.1428	0.5568	66.2022	Hyper
NC_019475.2	66892712	66893006	294	14	0.1964	0.6235	-0.4271	-59.2228	Hypo		NC_019463.2	112099838	112099938	100	4	0.7511	0.192	0.5591	14.1835	Hyper
NC_019478.2	49265428	49265511	83	9	0.3042	0.7305	-0.4263	-35.6055	Hypo		NC_019480.2	32801254	32801360	106	9	0.7039	0.1429	0.5611	43.7263	Hyper
NC_019468.2	7748877	7749043	166	10	0.1329	0.559	-0.4261	-36.4019	Hypo		NC_019476.2	35441345	35441397	52	7	0.7163	0.155	0.5612	29.1226	Hyper
NC_019471.2	25553995	25554056	61	9	0.1523	0.5778	-0.4255	-32.2387	Hypo		NC_019462.2	107517211	107517311	100	11	0.6952	0.1333	0.5619	59.6606	Hyper
NC_019461.2	7572344	7572430	86	7	0.1626	0.5871	-0.4245	-23.504	Hypo		NC_019460.2	92482639	92482707	68	6	0.6432	0.0788	0.5644	30.1638	Hyper
NC_019473.2	70984455	70984616	161	10	0.0706	0.4938	-0.4233	-44.918	Hypo		NC_019460.2	103587651	103587759	108	10	0.7042	0.1395	0.5647	52.2092	Hyper
NC_019476.2	35106	35374	268	5	0.1684	0.5912	-0.4228	-23.049	Hypo		NC_019464.2	67234374	67234468	94	7	0.6647	0.099	0.5657	30.9186	Hyper
NC_019468.2	53014924	53015053	129	11	0.2609	0.6834	-0.4225	-41.0033	Hypo		NC_019458.2	22499165	22499266	101	5	0.7975	0.2311	0.5664	18.6485	Hyper
NC_019478.2	24539385	24539481	96	10	0.1022	0.523	-0.4208	-39.5942	Hypo		NC_019477.2	49248622	49248718	96	4	0.7013	0.1348	0.5665	13.6991	Hyper
NC_019483.2	904333	904605	272	15	0.1282	0.5485	-0.4203	-74.7185	Hypo		NC_019470.2	43951235	43951296	61	5	0.6657	0.0988	0.5669	22.9099	Hyper
NC_019460.2	219723678	219723873	195	10	0.1473	0.5673	-0.4201	-35.0125	Hypo		NC_019483.2	37433258	37433455	197	23	0.6587	0.0916	0.5671	210.439	Hyper
NC_019460.2	220849011	220849103	92	10	0.1385	0.5569	-0.4184	-38.1178	Hypo		NC_019461.2	116299704	116299857	153	14	0.7219	0.1547	0.5672	82.4421	Hyper
NC_019469.2	44499839	44499899	60	10	0.1552	0.5731	-0.4179	-34.7698	Hypo		NC_019461.2	117809647	117809778	131	10	0.6711	0.1036	0.5674	53.9479	Hyper
NC_019472.2	73104518	73104573	55	5	0.073	0.4909	-0.4179	-21.6597	Hypo		NC_019471.2	50094230	50094301	71	4	0.6942	0.1252	0.569	14.0152	Hyper
NC_019472.2	73180510	73180611	101	5	0.0779	0.4957	-0.4178	-29.4471	Hypo		NC_019478.2	43581550	43581638	88	6	0.6662	0.096	0.5702	26.5698	Hyper
NC_019472.2	28941416	28941557	141	15	0.0652	0.4826	-0.4175	-83.7885	Hypo		NC_019460.2	161566298	161566374	76	4	0.6953	0.1239	0.5714	14.0876	Hyper
NC_019468.2	26756487	26756562	75	6	0.1232	0.5407	-0.4175	-20.8114	Hypo		NC_019472.2	77624301	77624470	169	9	0.7211	0.1484	0.5727	46.8293	Hyper
NC_019460.2	2037064	2037117	53	5	0.1336	0.5508	-0.4173	-18.1112	Hypo		NC_019462.2	58982348	58982433	85	6	0.6861	0.1133	0.5728	24.8867	Hyper
NC_019471.2	7305749	7305847	98	7	0.0801	0.4968	-0.4167	-24.8798	Hypo		NC_019484.2	738575	738673	98	7	0.685	0.1106	0.5745	30.9814	Hyper
NC_019481.2	30115531	30115610	79	15	0.1325	0.5493	-0.4167	-67.6268	Hypo		NC_019470.2	82095759	82095874	115	8	0.6568	0.0816	0.5751	45.5774	Hyper
NC_019471.2	12115871	12115928	57	4	0.1137	0.5296	-0.4159	-12.6109	Hypo		NC_019471.2	34438678	34438818	140	6	0.6942	0.1188	0.5754	29.3639	Hyper
NC_019473.2	70016562	70016680	118	7	0.0518	0.4663	-0.4145	-27.8349	Hypo		NC_019466.2	15919317	15919369	52	8	0.7109	0.1354	0.5755	36.3406	Hyper
NC_019460.2	210887668	210887729	61	4	0.1153	0.5298	-0.4145	-15.8025	Hypo		NC_019467.2	84820683	84820756	73	4	0.6768	0.1012	0.5756	14.5612	Hyper
NC_019461.2	118125610	118125760	150	11	0.1597	0.5739	-0.4142	-39.3507	Hypo		NC_019468.2	47352935	47353008	73	8	0.6911	0.1147	0.5764	37.5778	Hyper
NC_019476.2	58378279	58378430	151	12	0.2085	0.6225	-0.414	-44.8661	Hypo		NC_019483.2	40961355	40961439	84	9	0.7712	0.1944	0.5768	45.6723	Hyper
NC_019470.2	38283107	38283179	72	4	0.1275	0.5414	-0.4139	-12.8186	Hypo		NC_019460.2	214821596	214821694	98	6	0.6953	0.1178	0.5775	25.2157	Hyper
NC_019460.2	217729692	217729800	108	10	0.1911	0.6049	-0.4138	-36.6116	Hypo		NC_019469.2	49878620	49878685	65	4	0.6793	0.1017	0.5776	17.6834	Hyper
NC_019462.2	95837541	95837872	331	13	0.0959	0.5081	-0.4122	-58.2827	Hypo		NC_019474.2	62917155	62917255	100	10	0.7086	0.1301	0.5785	52.2229	Hyper
NC_019476.2	33299	33607	308	12	0.2324	0.6441	-0.4117	-63.4197	Hypo		NC_019464.2	16732122	16732558	436	40	0.744	0.1656	0.5785	423.452	Hyper
NC_019482.2	34573105	34573244	139	11	0.2239	0.6348	-0.4109	-39.5002	Hypo		NC_019462.2	42794130	42794209	79	4	0.6861	0.105	0.581	14.8452	Hyper
NC_019468.2	60190483	60190652	169	21	0.2076	0.618	-0.4103	-96.3528	Hypo		NC_019464.2	19738374	19738552	178	9	0.7141	0.1324	0.5817	47.4647	Hyper
NC_019458.2	22281029	22281209	180	12	0.1253	0.5353	-0.41	-41.2799	Hypo		NC_019465.2	89797589	89797689	100	5	0.6597	0.076	0.5837	21.3972	Hyper
NC_019464.2	97905825	97905902	77	5	0.1121	0.5217	-0.4097	-19.2121	Hypo		NC_019477.2	15809557	15809793	236	14	0.678	0.0942	0.5838	107.445	Hyper
NC_019473.2	71487951	71488051	100	11	0.1466	0.5561	-0.4095	-46.9559	Hypo		NC_019474.2	44179932	44180139	207	18	0.7594	0.1728	0.5867	128.519	Hyper
NC_019460.2	104417633	104417752	119	12	0.0953	0.5044	-0.4091	-52.2317	Hypo		NC_019480.2	49916387	49916552	165	10	0.6952	0.108	0.5872	54.7527	Hyper
NC_019471.2	39837795	39837906	111	6	0.0715	0.4784	-0.4069	-25.7782	Hypo		NC_019471.2	45465566	45465657	91	9	0.7433	0.1551	0.5882	44.4857	Hyper
NC_019483.2	12862079	12862148	69	6	0.0988	0.5058	-0.4069	-20.4611	Hypo		NC_019459.2	45241249	45241341	92	4	0.7031	0.114	0.5891	15.4664	Hyper
NC_019460.2	161998176	161998252	76	7	0.1461	0.553	-0.4068	-24.565	Hypo		NC_019476.2	582456	582546	90	5	0.7664	0.1771	0.5893	19.5598	Hyper
NC_019479.2	44543126	44543408	282	14	0.074	0.4808	-0.4067	-67.0372	Hypo		NC_019468.2	11078221	11078288	67	7	0.7146	0.125	0.5896	31.7052	Hyper
NC_019461.2	113792057	113792128	71	7	0.17	0.5764	-0.4064	-22.2522	Hypo		NC_019480.2	62069993	62070128	135	6	0.6447	0.0547	0.59	31.1775	Hyper
NC_019482.2	41419660	41419761	101	4	0.0925	0.4987	-0.4062	-14.0805	Hypo		NC_019468.2	13423823	13423909	86	5	0.6931	0.1029	0.5902	21.2115	Hyper
NC_019463.2	116057927	116058114	187	14	0.1309	0.5369	-0.406	-51.6989	Hypo		NC_019469.2	76440155	76440253	98	5	0.7094	0.1174	0.592	20.9691	Hyper
NC_019467.2	30599481	30599535	54	6	0.1301	0.5349	-0.4048	-18.8501	Hypo		NC_019483.2	37878551	37878633	82	4	0.6885	0.0954	0.593	20.668	Hyper
NC_019460.2	3406739	3406810	71	16	0.2016	0.606	-0.4044	-63.9363	Hypo		NC_019481.2	3089496	3089588	92	7	0.7343	0.141	0.5934	32.5419	Hyper
NC_019463.2	102427174	102427256	82	11	0.1712	0.5743	-0.4031	-36.4005	Hypo		NC_019471.2	4897865	4897962	97	5	0.7256	0.1319	0.5937	20.1827	Hyper
NC_019469.2	77585102	77585356	254	16	0.1334	0.536	-0.4026	-77.1016	Hypo		NC_019477.2	27430318	27430395	77	5	0.7333	0.1392	0.5941	19.9835	Hyper
NC_019477.2	50425605	50425725	120	8	0.2048	0.6073	-0.4025	-28.453	Hypo		NC_019462.2	105903530	105903622	92	11	0.7287	0.1343	0.5944	60.8929	Hyper
NC_019460.2	93409137	93409212	75	4	0.1029	0.5052	-0.4022	-13.1192	Hypo		NC_019472.2	45835983	45836075	92	4	0.6861	0.0909	0.5952	17.6721	Hyper
NC_019479.2	49774987	49775136	149	12	0.0896	0.4918	-0.4022	-52.6269	Hypo		NC_019460.2	213805686	213805780	94	5	0.7267	0.1308	0.5959	20.2591	Hyper
NC_019481.2	866435	866503	68	4	0.1044	0.5066	-0.4022	-14.4558	Hypo		NC_019470.2	33946567	33946737	170	8	0.6994	0.1032	0.5962	41.6627	Hyper
NC_019474.2	65817425	65817483	58	11	0.1595	0.5586	-0.3991	-40.4144	Hypo		NC_019469.2	48927464	48927698	234	14	0.7316	0.1352	0.5963	91.7968	Hyper
NC_019474.2	66866138	66866239	101	9	0.1742	0.5734	-0.3991	-31.1883	Hypo		NC_019481.2	11449344	11449428	84	6	0.712	0.1157	0.5963	27.4245	Hyper
NC_019466.2	14635334	14635486	152	11	0.1226	0.5209	-0.3983	-41.8423	Hypo		NC_019477.2	26523635	26523689	54	6	0.7013	0.1035	0.5978	29.0314	Hyper
NC_019471.2	39478888	39478942	54	6	0.177	0.5752	-0.3982	-23.4229	Hypo		NC_019484.2	35496817	35496970	153	19	0.7248	0.1267	0.5981	143.654	Hyper
NC_019472.2	80554653	80554711	58	5	0.1149	0.5128	-0.3979	-19.0719	Hypo		NC_019468.2	60633144	60633281	137	8	0.6647	0.064	0.6007	53.6509	Hyper
NC_019471.2	41095746	41096149	403	26	0.0871	0.4844	-0.3973	-137.134	Hypo		NC_019477.2	49904136	49904229	93	6	0.7195	0.1175	0.602	27.6335	Hyper
NC_019463.2	116091129	116091470	341	24	0.1556	0.5526	-0.397	-114.007	Hypo		NC_019460.2	8210040	8210228	188	11	0.7899	0.1869	0.603	61.5728	Hyper
NC_019462.2	6274244	6274308	64	7	0.1041	0.5008	-0.3967	-20.9928	Hypo		NC_019481.2	9934013	9934132	119	6	0.6959	0.0928	0.6031	33.6955	Hyper
NC_019460.2	93841567	93841663	96	9	0.1628	0.5587	-0.3959	-38.0945	Hypo		NC_019484.2	54207559	54207681	122	9	0.7183	0.1141	0.6042	52.9673	Hyper
NC_019475.2	64602751	64602872	121	9	0.1304	0.5249	-0.3945	-32.9503	Hypo		NC_019470.2	68888635	68888724	89	5	0.7449	0.1401	0.6047	25.0963	Hyper
NC_019479.2	15896732	15899230	2498	20	0.1259	0.52	-0.3941	-165.102	Hypo		NC_019465.2	78521947	78522029	82	5	0.6861	0.0803	0.6058	25.9087	Hyper
NC_019467.2	84645574	84645736	162	18	0.0901	0.484	-0.3939	-94.8566	Hypo		NC_019475.2	62805281	62806467	1186	9	0.6868	0.0797	0.6071	43.944	Hyper
NC_019464.2	97970662	97970845	183	19	0.1258	0.5182	-0.3924	-85.3343	Hypo		NC_019460.2	219223951	219224044	93	4	0.7169	0.1072	0.6097	16.3008	Hyper
NC_019460.2	103419508	103419605	97	7	0.1432	0.5343	-0.3911	-23.6603	Hypo		NC_019460.2	216549223	216549284	61	5	0.741	0.1308	0.6102	21.2347	Hyper
NC_019463.2	114899552	114899688	136	20	0.2119	0.6026	-0.3908	-78.0035	Hypo		NC_019481.2	23366465	23366576	111	7	0.7298	0.1192	0.6107	36.168	Hyper
NC_019479.2	43073207	43073321	114	9	0.1168	0.5054	-0.3887	-36.7862	Hypo		NC_019481.2	755873	755959	86	7	0.7343	0.1215	0.6128	35.4759	Hyper
NC_019469.2	78779929	78780046	117	24	0.1279	0.5147	-0.3867	-124.527	Hypo		NC_019469.2	59441015	59441075	60	5	0.7513	0.1381	0.6132	21.3027	Hyper
NC_019467.2	86041636	86041799	163	14	0.0564	0.4431	-0.3867	-70.1258	Hypo		NC_019468.2	59955331	59955413	82	7	0.7054	0.0921	0.6133	38.0825	Hyper
NC_019460.2	1671340	1671464	124	16	0.2355	0.6213	-0.3858	-67.8696	Hypo		NC_019471.2	13152197	13152267	70	5	0.7256	0.1122	0.6134	22.6298	Hyper
NC_019479.2	44177964	44178111	147	10	0.115	0.4993	-0.3843	-37.6822	Hypo		NC_019469.2	49818857	49819029	172	7	0.7399	0.1249	0.615	39.4956	Hyper
NC_019477.2	27411910	27412058	148	15	0.1262	0.5101	-0.384	-56.2538	Hypo		NC_019481.2	4217874	4217945	71	5	0.7423	0.1264	0.6159	22.2276	Hyper
NC_019461.2	117312815	117312914	99	9	0.0986	0.4824	-0.3838	-33.8202	Hypo		NC_019464.2	3670181	3670255	74	5	0.724	0.1066	0.6174	21.9261	Hyper
NC_019478.2	49303706	49303798	92	13	0.1636	0.5474	-0.3838	-51.0379	Hypo		NC_019470.2	11605505	11605604	99	4	0.6873	0.0698	0.6174	25.6285	Hyper
NC_019480.2	56513100	56513198	98	7	0.1277	0.511	-0.3833	-24.5812	Hypo		NC_019468.2	37020071	37020146	75	6	0.7515	0.1333	0.6182	27.7643	Hyper
NC_019478.2	33622823	33622874	51	5	0.1013	0.4827	-0.3813	-17.6782	Hypo		NC_019464.2	84387181	84387269	88	8	0.7611	0.1424	0.6186	41.1711	Hyper
NC_019477.2	50355691	50355840	149	18	0.063	0.4442	-0.3812	-89.6932	Hypo		NC_019469.2	51774097	51774179	82	5	0.7376	0.1189	0.6187	22.1298	Hyper
NC_019484.2	77088298	77088386	88	4	0.1136	0.4943	-0.3806	-14.8928	Hypo		NC_019466.2	84537570	84537718	148	7	0.6844	0.0657	0.6187	42.6267	Hyper
NC_019476.2	12006066	12006152	86	8	0.1612	0.5412	-0.38	-26.9681	Hypo		NC_019477.2	16652410	16652509	99	5	0.7507	0.1312	0.6194	22.0056	Hyper
NC_019474.2	12373822	12373888	66	7	0.3184	0.6983	-0.3798	-25.8128	Hypo		NC_019468.2	54732920	54733000	80	5	0.7224	0.1029	0.6195	23.7376	Hyper
NC_019467.2	83780301	83780356	55	5	0.1283	0.5075	-0.3792	-23.9719	Hypo		NC_019469.2	46675662	46675765	103	5	0.775	0.1551	0.6199	24.1403	Hyper
NC_019460.2	1906605	1906859	254	12	0.0767	0.4552	-0.3785	-53.4754	Hypo		NC_019483.2	11188852	11188937	85	6	0.7596	0.1394	0.6202	28.6868	Hyper
NC_019477.2	16110862	16110951	89	5	0.0711	0.4492	-0.3781	-25.1278	Hypo		NC_019473.2	66316217	66316307	90	5	0.7057	0.0853	0.6204	22.6811	Hyper
NC_019478.2	44677366	44677496	130	13	0.0994	0.4743	-0.3749	-56.6838	Hypo		NC_019470.2	57645705	57645801	96	7	0.7657	0.1446	0.621	40.0738	Hyper
NC_019478.2	49059736	49060044	308	19	0.1062	0.4807	-0.3744	-97.6493	Hypo		NC_019481.2	34372497	34372614	117	7	0.7343	0.1114	0.6229	37.0412	Hyper
NC_019463.2	110518485	110518560	75	12	0.2215	0.5952	-0.3737	-42.8074	Hypo		NC_019465.2	89334623	89334754	131	5	0.6802	0.0569	0.6233	25.8249	Hyper
NC_019465.2	89155073	89155174	101	5	0.1046	0.4777	-0.3731	-18.0473	Hypo		NC_019469.2	67718984	67719085	101	6	0.7545	0.1308	0.6237	29.0809	Hyper
NC_019460.2	206995399	206995628	229	18	0.1704	0.5423	-0.3719	-81.3764	Hypo		NC_019474.2	69526632	69526727	95	7	0.7664	0.1419	0.6245	36.2362	Hyper
NC_019470.2	72015893	72015949	56	8	0.1175	0.4882	-0.3708	-38.9055	Hypo		NC_019472.2	34614034	34614108	74	5	0.7342	0.1096	0.6245	22.6976	Hyper
NC_019460.2	1901434	1901584	150	13	0.1573	0.5272	-0.3698	-48.4502	Hypo		NC_019473.2	35448921	35448997	76	4	0.6949	0.07	0.6249	17.9806	Hyper
NC_019459.2	248132813	248133046	233	26	0.1655	0.5326	-0.3671	-115.68	Hypo		NC_019464.2	79350267	79350327	60	5	0.6944	0.068	0.6263	28.565	Hyper
NC_019470.2	54157931	54158101	170	16	0.15	0.517	-0.367	-61.2547	Hypo		NC_019460.2	220469365	220469425	60	7	0.7634	0.135	0.6284	36.4916	Hyper
NC_019482.2	43641181	43641293	112	7	0.2152	0.5821	-0.3668	-44.8581	Hypo		NC_019483.2	36973208	36973305	97	6	0.7134	0.0849	0.6285	32.6843	Hyper
NC_019477.2	8286701	8286767	66	9	0.1682	0.534	-0.3658	-33.7999	Hypo		NC_019460.2	2604789	2604866	77	4	0.7358	0.1072	0.6286	17.3181	Hyper
NC_019477.2	49801986	49802157	171	20	0.1232	0.4884	-0.3653	-91.3149	Hypo		NC_019460.2	211727168	211727252	84	7	0.7637	0.135	0.6286	36.3175	Hyper
NC_019476.2	327	470	143	9	0.1769	0.5415	-0.3645	-39.3896	Hypo		NC_019474.2	55770486	55770586	100	6	0.7602	0.1301	0.6302	29.9105	Hyper
NC_019472.2	24212207	24212433	226	11	0.0849	0.4488	-0.3639	-46.8459	Hypo		NC_019459.2	185493295	185493363	68	6	0.7714	0.1404	0.631	30.2722	Hyper
NC_019473.2	69272502	69272570	68	12	0.0781	0.4402	-0.3621	-55.2365	Hypo		NC_019470.2	53146191	53146285	94	5	0.7304	0.0989	0.6315	23.9143	Hyper
NC_019478.2	39567184	39567315	131	20	0.1366	0.497	-0.3604	-82.9055	Hypo		NC_019472.2	24076916	24076973	57	5	0.7196	0.087	0.6325	25.4407	Hyper
NC_019477.2	50237609	50237665	56	5	0.0865	0.4459	-0.3594	-19.2163	Hypo		NC_019461.2	74888299	74888401	102	6	0.7279	0.093	0.6349	32.332	Hyper
NC_019468.2	39559263	39559428	165	14	0.1282	0.4866	-0.3585	-53.3831	Hypo		NC_019467.2	35951504	35951632	128	7	0.7496	0.1144	0.6352	36.9988	Hyper
NC_019467.2	25797108	25797218	110	15	0.178	0.5354	-0.3574	-65.2187	Hypo		NC_019480.2	25135964	25136019	55	5	0.7267	0.0895	0.6372	25.7316	Hyper
NC_019471.2	1033910	1034077	167	16	0.2556	0.6118	-0.3562	-57.1417	Hypo		NC_019482.2	1479824	1479893	69	6	0.7501	0.1122	0.6378	30.814	Hyper
NC_019477.2	17512884	17513102	218	11	0.0688	0.4246	-0.3558	-43.1841	Hypo		NC_019476.2	54883367	54883515	148	8	0.8428	0.2035	0.6393	46.3796	Hyper
NC_019466.2	14521364	14521520	156	5	0.1494	0.5048	-0.3553	-20.8785	Hypo		NC_019464.2	85344326	85344377	51	7	0.7315	0.0912	0.6402	40.9259	Hyper
NC_019471.2	12730688	12730814	126	12	0.1159	0.4637	-0.3478	-46.3014	Hypo		NC_019471.2	7427217	7427308	91	4	0.7158	0.0755	0.6403	19.2975	Hyper
NC_019458.2	264848623	264848887	264	13	0.3268	0.6737	-0.3468	-69.6021	Hypo		NC_019466.2	44514014	44514094	80	6	0.7347	0.0935	0.6412	34.9437	Hyper
NC_019475.2	1054030	1054138	108	9	0.2393	0.5838	-0.3445	-38.388	Hypo		NC_019470.2	66345035	66345103	68	4	0.7393	0.0974	0.6419	18.4354	Hyper
NC_019460.2	5107048	5107102	54	8	0.2652	0.6068	-0.3416	-39.0439	Hypo		NC_019482.2	2508427	2508528	101	6	0.7463	0.1034	0.6429	32.1804	Hyper
NC_019484.2	8412686	8412842	156	10	0.1995	0.5379	-0.3384	-50.0485	Hypo		NC_019464.2	20219418	20219509	91	8	0.7698	0.125	0.6448	45.1288	Hyper
NC_019467.2	86136087	86136183	96	8	0.0708	0.4003	-0.3295	-35.5195	Hypo		NC_019465.2	2343648	2343744	96	5	0.7113	0.0636	0.6476	25.8791	Hyper
NC_019482.2	43641049	43641112	63	6	0.1981	0.5249	-0.3268	-33.5418	Hypo		NC_019472.2	36049830	36049882	52	8	0.7438	0.0947	0.6491	48.2353	Hyper
NC_019471.2	60318719	60318970	251	26	0.2305	0.5557	-0.3252	-112.83	Hypo		NC_019468.2	60496095	60496161	66	4	0.7389	0.0892	0.6497	21.2254	Hyper
NC_019460.2	205451584	205451661	77	4	0.1063	0.4117	-0.3055	-21.8791	Hypo		NC_019460.2	1870613	1870707	94	4	0.7169	0.0639	0.653	21.9649	Hyper
NC_019460.2	133486065	133488658	2593	9	0.2531	0.5444	-0.2913	-23.0982	Hypo		NC_019460.2	221953045	221953171	126	8	0.7504	0.0963	0.6541	52.0257	Hyper
NC_019460.2	92540312	92541688	1376	16	0.2941	0.4937	-0.1997	-35.3814	Hypo		NC_019460.2	213246258	213246337	79	5	0.8468	0.189	0.6578	24.0939	Hyper
NC_019469.2	1419154	1423522	4368	14	0.4058	0.4754	-0.0696	-10.1666	Hypo		NC_019468.2	25397720	25397785	65	4	0.747	0.0884	0.6587	19.5802	Hyper
											NC_019460.2	177853837	177853932	95	4	0.7634	0.1013	0.662	19.5672	Hyper
											NC_019460.2	14614476	14614537	61	5	0.7735	0.1112	0.6623	26.6935	Hyper
											NC_019470.2	76800743	76800804	61	6	0.7849	0.1204	0.6645	33.8859	Hyper
											NC_019482.2	16226454	16226521	67	5	0.7629	0.0924	0.6705	29.2119	Hyper
											NC_019465.2	27874881	27874981	100	4	0.7493	0.0774	0.672	20.9147	Hyper
											NC_019460.2	8295979	8296044	65	4	0.7984	0.1241	0.6743	20.349	Hyper
											NC_019462.2	18718867	18718964	97	6	0.8005	0.1241	0.6764	35.0412	Hyper
											NC_019476.2	52525323	52525404	81	8	0.7974	0.1174	0.6801	56.1473	Hyper
											NC_019472.2	28046691	28046822	131	5	0.7756	0.0943	0.6813	30.7011	Hyper
											NC_019477.2	10628054	10628151	97	6	0.8257	0.1423	0.6834	34.6562	Hyper
											NC_019465.2	30899007	30899075	68	4	0.7498	0.0568	0.693	23.7346	Hyper
											NC_019476.2	42802222	42802323	101	4	0.8495	0.1557	0.6939	22.4356	Hyper
											NC_019468.2	34146058	34146282	224	10	0.7922	0.0974	0.6948	78.9799	Hyper
											NC_019470.2	71161795	71161866	71	4	0.8101	0.1148	0.6953	21.898	Hyper
											NC_019463.2	113364571	113364673	102	4	0.8525	0.1541	0.6984	21.9523	Hyper
											NC_019482.2	30852401	30852471	70	4	0.7975	0.0949	0.7025	23.374	Hyper
											NC_019477.2	11010765	11010845	80	4	0.8315	0.1037	0.7278	28.0685	Hyper
											NC_019469.2	46828063	46828159	96	4	0.8307	0.1017	0.7291	25.7436	Hyper
											NC_019469.2	19999640	19999739	99	4	0.8548	0.1216	0.7332	26.9431	Hyper
											NC_019473.2	42222663	42222756	93	6	0.8208	0.0748	0.746	48.9511	Hyper

## Sheet: 16-cell_VS_Morula.DMR
Chr	Start	End	Length	N_CG	Methyl_C16	Methyl_C32	Diff_methyl	AreaStat	Direction		Start	End	Length	N_CG	Methyl_C16	Methyl_C32	Diff_methyl	AreaStat	Direction
NC_019471.2	34615284	34615374	90	4	0.0511	0.8072	-0.7561	-31.6931	Hypo		NC_019473.2	3521919	3523188	1269	7	0.337	0.3334	0.0036	-0.2281	Hyper
NC_019462.2	11196553	11196637	84	4	0.102	0.8422	-0.7402	-27.0987	Hypo		NC_019466.2	35687147	35688575	1428	22	0.3774	0.3698	0.0076	-5.9138	Hyper
NC_019479.2	42695803	42695917	114	4	0.0848	0.8189	-0.7341	-26.9727	Hypo		NC_019468.2	7923046	7927365	4319	13	0.3861	0.3748	0.0113	-0.3001	Hyper
NC_019481.2	14297666	14297771	105	4	0.0902	0.8201	-0.73	-27.8643	Hypo		NC_019460.2	1418606	1423457	4851	14	0.3877	0.3763	0.0114	-8.6133	Hyper
NC_019471.2	17618436	17618535	99	4	0.1032	0.8307	-0.7275	-25.9293	Hypo		NC_019478.2	48601595	48603524	1929	20	0.4259	0.4005	0.0254	-12.3358	Hyper
NC_019467.2	68021290	68021360	70	6	0.0785	0.7985	-0.72	-50.8758	Hypo		NC_019468.2	56051029	56051482	453	9	0.4062	0.3697	0.0366	3.2817	Hyper
NC_019460.2	103402815	103402909	94	6	0.1327	0.8523	-0.7195	-42.539	Hypo		NC_019481.2	34783837	34787837	4000	24	0.4341	0.3831	0.051	10.8281	Hyper
NC_019482.2	6331890	6331999	109	5	0.0853	0.8025	-0.7172	-34.1231	Hypo		NC_019460.2	35115371	35118673	3302	26	0.452	0.3846	0.0674	18.6798	Hyper
NC_019461.2	117809647	117809778	131	10	0.1129	0.8269	-0.7141	-89.8829	Hypo		NC_019478.2	42054192	42056339	2147	11	0.4503	0.3812	0.0691	14.0138	Hyper
NC_019482.2	16513820	16513878	58	4	0.1061	0.8193	-0.7132	-23.7441	Hypo		NC_019460.2	222438035	222438717	682	14	0.369	0.2924	0.0766	6.9836	Hyper
NC_019459.2	184445951	184446123	172	9	0.1384	0.8507	-0.7123	-72.7574	Hypo		NC_019479.2	49883777	49884713	936	25	0.4206	0.3317	0.0889	17.0982	Hyper
NC_019475.2	45664999	45665084	85	5	0.1043	0.8163	-0.712	-32.8776	Hypo		NC_019479.2	46366429	46367581	1152	15	0.4843	0.3928	0.0915	17.4367	Hyper
NC_019467.2	81565487	81565742	255	4	0.0785	0.7883	-0.7098	-23.1744	Hypo		NC_019471.2	11164163	11166820	2657	18	0.4264	0.2757	0.1507	32.2058	Hyper
NC_019467.2	25929388	25929505	117	4	0.0748	0.7841	-0.7093	-24.2008	Hypo		NC_019460.2	137042880	137044446	1566	19	0.4934	0.3031	0.1903	30.644	Hyper
NC_019467.2	81792360	81792422	62	4	0.1145	0.8235	-0.709	-23.2952	Hypo		NC_019482.2	42421788	42424800	3012	7	0.4729	0.2755	0.1974	8.5058	Hyper
NC_019469.2	77069813	77069934	121	10	0.0847	0.7926	-0.7079	-87.2193	Hypo		NC_019460.2	37562966	37563620	654	16	0.4451	0.2321	0.213	48.3033	Hyper
NC_019461.2	74888299	74888405	106	6	0.1013	0.8029	-0.7016	-41.6086	Hypo		NC_019471.2	13132454	13133839	1385	11	0.4674	0.2501	0.2173	26.8934	Hyper
NC_019480.2	3349768	3349879	111	10	0.1087	0.8067	-0.6981	-96.6689	Hypo		NC_019478.2	49443999	49444268	269	34	0.3707	0.068	0.3027	202.374	Hyper
NC_019481.2	33636303	33636421	118	7	0.132	0.8297	-0.6977	-50.1571	Hypo		NC_019477.2	17679555	17679733	178	31	0.3811	0.0745	0.3067	153.578	Hyper
NC_019480.2	54473356	54473415	59	5	0.1136	0.8104	-0.6969	-29.6074	Hypo		NC_019476.2	59161795	59161906	111	4	0.4174	0.102	0.3154	19.5771	Hyper
NC_019475.2	20645644	20645727	83	5	0.1258	0.8214	-0.6956	-30.2775	Hypo		NC_019459.2	89742771	89743030	259	47	0.4175	0.1017	0.3158	262.615	Hyper
NC_019460.2	59894796	59894873	77	4	0.1032	0.7986	-0.6954	-22.8218	Hypo		NC_019471.2	11019491	11019575	84	4	0.3942	0.0737	0.3206	25.5901	Hyper
NC_019482.2	34429218	34429339	121	10	0.1092	0.8033	-0.6941	-80.6837	Hypo		NC_019481.2	41284442	41284779	337	30	0.6126	0.2894	0.3232	156.084	Hyper
NC_019468.2	54253771	54253842	71	5	0.0893	0.7828	-0.6936	-30.3181	Hypo		NC_019465.2	90198285	90198357	72	7	0.3871	0.0604	0.3267	42.3796	Hyper
NC_019472.2	74390593	74390688	95	4	0.0925	0.7829	-0.6904	-22.1411	Hypo		NC_019475.2	29588461	29588659	198	23	0.5181	0.1787	0.3394	103.5	Hyper
NC_019462.2	37900637	37900736	99	4	0.1135	0.8033	-0.6898	-21.5873	Hypo		NC_019465.2	88468873	88469090	217	25	0.4561	0.114	0.3421	128.31	Hyper
NC_019468.2	9099346	9099398	52	7	0.1303	0.8201	-0.6898	-45.2435	Hypo		NC_019478.2	46284837	46284938	101	6	0.4692	0.1271	0.3421	29.3514	Hyper
NC_019481.2	1957565	1957616	51	5	0.14	0.8293	-0.6893	-29.1388	Hypo		NC_019466.2	16130177	16130255	78	8	0.4962	0.1541	0.3421	33.8148	Hyper
NC_019482.2	5861291	5861357	66	4	0.1316	0.8194	-0.6877	-21.2314	Hypo		NC_019476.2	59027427	59027482	55	4	0.7481	0.4056	0.3424	16.0704	Hyper
NC_019477.2	50590197	50590343	146	7	0.1226	0.808	-0.6854	-46.6521	Hypo		NC_019471.2	11019674	11019741	67	6	0.4254	0.0793	0.3461	25.1419	Hyper
NC_019468.2	36887738	36887835	97	4	0.0879	0.773	-0.6852	-21.8607	Hypo		NC_019458.2	720635	720717	82	7	0.4842	0.1378	0.3465	31.3452	Hyper
NC_019484.2	81979361	81979449	88	4	0.0732	0.7557	-0.6825	-22.6439	Hypo		NC_019476.2	58796725	58798326	1601	5	0.5409	0.1942	0.3466	20.8685	Hyper
NC_019468.2	61408200	61408354	154	15	0.1353	0.8155	-0.6803	-150.215	Hypo		NC_019460.2	216167494	216167639	145	12	0.6054	0.2587	0.3468	52.777	Hyper
NC_019467.2	10589165	10589316	151	11	0.1375	0.8177	-0.6802	-80.2661	Hypo		NC_019480.2	730780	730984	204	22	0.6618	0.3103	0.3515	87.7605	Hyper
NC_019476.2	51251312	51251460	148	7	0.1005	0.7806	-0.68	-48.1059	Hypo		NC_019471.2	25089762	25089843	81	10	0.4784	0.1234	0.3549	35.5224	Hyper
NC_019480.2	19821233	19821387	154	4	0.1176	0.7951	-0.6775	-21.6979	Hypo		NC_019474.2	62167669	62167744	75	13	0.6151	0.2596	0.3556	63.0839	Hyper
NC_019473.2	66722088	66722176	88	6	0.081	0.7584	-0.6774	-35.3286	Hypo		NC_019481.2	2409736	2409935	199	18	0.5031	0.1472	0.3559	77.4589	Hyper
NC_019460.2	219040351	219040421	70	4	0.0975	0.7743	-0.6768	-20.7302	Hypo		NC_019469.2	59429322	59429397	75	6	0.4689	0.1112	0.3577	24.2259	Hyper
NC_019479.2	50381959	50382133	174	7	0.1198	0.7957	-0.6758	-43.8775	Hypo		NC_019476.2	58798425	58798501	76	7	0.6391	0.2793	0.3598	31.7307	Hyper
NC_019480.2	41961011	41961074	63	4	0.1174	0.7925	-0.675	-19.8361	Hypo		NC_019462.2	9528199	9528251	52	4	0.4369	0.0768	0.3601	15.9349	Hyper
NC_019480.2	22466452	22466558	106	6	0.1471	0.8206	-0.6735	-33.8404	Hypo		NC_019462.2	5701909	5701980	71	6	0.5752	0.2124	0.3627	23.7458	Hyper
NC_019468.2	57179499	57179677	178	13	0.1028	0.7758	-0.673	-116.337	Hypo		NC_019481.2	2950536	2950743	207	23	0.6323	0.2694	0.3629	131.377	Hyper
NC_019460.2	39397589	39397679	90	7	0.0779	0.7506	-0.6727	-50.2015	Hypo		NC_019481.2	33331558	33331746	188	15	0.5115	0.1482	0.3632	56.928	Hyper
NC_019475.2	23700367	23700463	96	4	0.1089	0.7815	-0.6725	-20.6831	Hypo		NC_019484.2	947704	947803	99	17	0.6082	0.244	0.3642	70.4796	Hyper
NC_019472.2	27515979	27516076	97	5	0.1255	0.7979	-0.6724	-25.8554	Hypo		NC_019475.2	4589313	4589431	118	12	0.545	0.1808	0.3642	44.5662	Hyper
NC_019473.2	68277648	68277706	58	4	0.0601	0.7324	-0.6722	-21.3809	Hypo		NC_019468.2	52470194	52470393	199	15	0.7595	0.3942	0.3653	57.8543	Hyper
NC_019474.2	50644230	50644285	55	7	0.1564	0.8284	-0.672	-43.2057	Hypo		NC_019471.2	12535043	12535122	79	5	0.5677	0.2019	0.3658	20.0208	Hyper
NC_019484.2	988926	989020	94	4	0.0838	0.7557	-0.6719	-21.528	Hypo		NC_019460.2	222222299	222222398	99	12	0.5338	0.1677	0.3661	48.1497	Hyper
NC_019470.2	41023591	41023703	112	8	0.0789	0.7503	-0.6714	-67.4083	Hypo		NC_019460.2	2780151	2780421	270	16	0.5062	0.1383	0.3679	70.654	Hyper
NC_019470.2	80546002	80546139	137	14	0.1189	0.7898	-0.6708	-121.995	Hypo		NC_019460.2	212624274	212624388	114	13	0.5862	0.2183	0.3679	47.1591	Hyper
NC_019482.2	35414046	35414122	76	6	0.0613	0.7317	-0.6703	-37.7306	Hypo		NC_019474.2	71351102	71351302	200	22	0.5333	0.1651	0.3682	111.785	Hyper
NC_019474.2	12232291	12232420	129	6	0.0648	0.7348	-0.67	-44.6101	Hypo		NC_019474.2	71203341	71203415	74	7	0.7964	0.4279	0.3685	27.7415	Hyper
NC_019469.2	1638732	1638958	226	14	0.1138	0.7838	-0.67	-132.832	Hypo		NC_019481.2	41453382	41453530	148	15	0.4802	0.1112	0.369	68.5689	Hyper
NC_019475.2	16505587	16505672	85	4	0.0891	0.7561	-0.667	-21.9977	Hypo		NC_019474.2	68039139	68039195	56	7	0.4809	0.1112	0.3697	29.0599	Hyper
NC_019459.2	14404309	14404389	80	4	0.139	0.8058	-0.6668	-19.2641	Hypo		NC_019468.2	16589127	16589192	65	7	0.5549	0.1848	0.3701	25.9291	Hyper
NC_019462.2	7430785	7430842	57	4	0.102	0.7687	-0.6667	-20.4994	Hypo		NC_019473.2	71536682	71536832	150	15	0.5057	0.135	0.3708	59.6337	Hyper
NC_019476.2	39042075	39042163	88	4	0.1308	0.7969	-0.6661	-20.1438	Hypo		NC_019478.2	41771714	41771803	89	15	0.5584	0.1846	0.3737	58.7588	Hyper
NC_019469.2	40503054	40503142	88	7	0.151	0.8144	-0.6634	-40.5772	Hypo		NC_019460.2	218982511	218982581	70	11	0.7767	0.4029	0.3738	38.9046	Hyper
NC_019476.2	52475625	52475743	118	4	0.1726	0.8356	-0.663	-19.7342	Hypo		NC_019477.2	8286730	8286789	59	11	0.5644	0.1898	0.3746	42.289	Hyper
NC_019474.2	54668035	54668114	79	4	0.1228	0.7849	-0.6621	-19.8076	Hypo		NC_019467.2	84244154	84244282	128	18	0.503	0.1283	0.3747	75.8686	Hyper
NC_019461.2	74366772	74366846	74	4	0.0884	0.7499	-0.6615	-21.853	Hypo		NC_019458.2	110820212	110820621	409	36	0.6465	0.2717	0.3749	169.904	Hyper
NC_019476.2	57657828	57658084	256	19	0.1081	0.7693	-0.6612	-209.909	Hypo		NC_019476.2	54951099	54951293	194	15	0.5555	0.1803	0.3752	61.0244	Hyper
NC_019461.2	110779589	110779642	53	6	0.108	0.7684	-0.6604	-55.1747	Hypo		NC_019475.2	67893080	67893205	125	13	0.5628	0.1874	0.3754	49.3679	Hyper
NC_019464.2	24106603	24106695	92	7	0.0562	0.7148	-0.6585	-48.7388	Hypo		NC_019474.2	72107450	72107530	80	15	0.72	0.3436	0.3765	54.6976	Hyper
NC_019473.2	68619608	68619715	107	8	0.0661	0.7244	-0.6583	-61.0645	Hypo		NC_019477.2	50641172	50641427	255	18	0.4731	0.0967	0.3765	85.9933	Hyper
NC_019459.2	102116273	102116417	144	7	0.1387	0.7966	-0.6579	-46.6605	Hypo		NC_019459.2	49000198	49000335	137	17	0.5281	0.1509	0.3772	66.6527	Hyper
NC_019480.2	391107	391212	105	12	0.1776	0.8348	-0.6572	-82.1974	Hypo		NC_019460.2	3455236	3455366	130	8	0.5583	0.1809	0.3774	28.5743	Hyper
NC_019475.2	33205679	33205839	160	6	0.1175	0.7711	-0.6536	-35.0027	Hypo		NC_019484.2	120786084	120786189	105	5	0.4375	0.0594	0.3781	22.1836	Hyper
NC_019469.2	30421417	30421489	72	4	0.0876	0.7408	-0.6532	-20.1083	Hypo		NC_019481.2	35470027	35470165	138	14	0.4864	0.1081	0.3783	68.1284	Hyper
NC_019459.2	235678830	235678882	52	4	0.1101	0.7633	-0.6532	-19.5883	Hypo		NC_019474.2	65731983	65732116	133	8	0.6112	0.2328	0.3784	31.5625	Hyper
NC_019464.2	85432717	85432768	51	5	0.0878	0.7403	-0.6525	-26.6715	Hypo		NC_019472.2	80554656	80554712	56	5	0.5221	0.1429	0.3791	18.3287	Hyper
NC_019471.2	13621572	13621669	97	4	0.0758	0.7276	-0.6517	-20.6367	Hypo		NC_019481.2	1520696	1520785	89	11	0.5579	0.1783	0.3796	39.1939	Hyper
NC_019483.2	22718398	22718489	91	4	0.117	0.7684	-0.6514	-18.0427	Hypo		NC_019478.2	29021216	29021305	89	9	0.5296	0.1478	0.3818	33.6657	Hyper
NC_019470.2	28318426	28318539	113	8	0.1355	0.7861	-0.6506	-46.9168	Hypo		NC_019460.2	217263550	217263603	53	6	0.6093	0.2273	0.3821	21.579	Hyper
NC_019474.2	65500872	65500937	65	5	0.1062	0.7558	-0.6496	-26.9806	Hypo		NC_019474.2	71292306	71292566	260	32	0.5984	0.2156	0.3828	200.629	Hyper
NC_019459.2	248218166	248218244	78	6	0.1675	0.8162	-0.6487	-32.7651	Hypo		NC_019463.2	115938278	115938353	75	10	0.551	0.168	0.383	34.8276	Hyper
NC_019461.2	56270726	56270827	101	7	0.1505	0.7984	-0.6479	-39.0983	Hypo		NC_019484.2	81058779	81058893	114	7	0.5792	0.1958	0.3834	27.3782	Hyper
NC_019472.2	75335196	75335276	80	6	0.0756	0.7209	-0.6453	-37.6709	Hypo		NC_019472.2	29821229	29821325	96	6	0.4608	0.0772	0.3836	26.8921	Hyper
NC_019480.2	3242764	3242850	86	7	0.1016	0.7468	-0.6453	-46.1712	Hypo		NC_019460.2	223663502	223663632	130	18	0.7078	0.3232	0.3846	70.836	Hyper
NC_019480.2	28791473	28791549	76	6	0.0882	0.7331	-0.6449	-33.2351	Hypo		NC_019471.2	5211116	5211215	99	8	0.5493	0.1645	0.3848	27.7966	Hyper
NC_019459.2	231905359	231905509	150	5	0.1847	0.8296	-0.6449	-28.1439	Hypo		NC_019468.2	33770880	33771003	123	9	0.4993	0.1144	0.3848	39.6156	Hyper
NC_019460.2	219296490	219296634	144	11	0.1573	0.8022	-0.6448	-72.6314	Hypo		NC_019461.2	118541089	118541299	210	11	0.7506	0.3643	0.3863	42.3992	Hyper
NC_019471.2	54250963	54251064	101	4	0.1015	0.7458	-0.6443	-18.4722	Hypo		NC_019462.2	17818534	17818644	110	15	0.5773	0.191	0.3863	57.0967	Hyper
NC_019472.2	72795653	72795733	80	7	0.1131	0.7559	-0.6428	-38.0392	Hypo		NC_019476.2	15217831	15217933	102	6	0.5141	0.1275	0.3866	21.7948	Hyper
NC_019469.2	77785160	77785259	99	5	0.1088	0.7497	-0.6409	-23.6854	Hypo		NC_019460.2	3778024	3778163	139	12	0.6292	0.2422	0.387	42.3221	Hyper
NC_019481.2	2382553	2382654	101	5	0.1205	0.7611	-0.6406	-25.1059	Hypo		NC_019476.2	56115651	56115797	146	11	0.6396	0.2526	0.387	40.3285	Hyper
NC_019480.2	42599876	42600000	124	9	0.1566	0.7971	-0.6405	-63.1752	Hypo		NC_019471.2	34134882	34134956	74	4	0.6164	0.2286	0.3878	13.6324	Hyper
NC_019459.2	220192322	220192416	94	12	0.1867	0.827	-0.6403	-79.2469	Hypo		NC_019470.2	53631035	53631129	94	4	0.4816	0.0932	0.3884	17.9226	Hyper
NC_019467.2	76534083	76534180	97	5	0.1108	0.7507	-0.6399	-24.0171	Hypo		NC_019475.2	76246	76527	281	10	0.491	0.1026	0.3884	42.8237	Hyper
NC_019478.2	42639518	42639613	95	4	0.1289	0.7687	-0.6398	-17.9833	Hypo		NC_019477.2	39297866	39297935	69	11	0.4841	0.0951	0.3891	42.5788	Hyper
NC_019467.2	85111850	85111946	96	10	0.1717	0.8113	-0.6396	-64.5984	Hypo		NC_019477.2	46844070	46844246	176	22	0.54	0.1505	0.3895	99.0596	Hyper
NC_019477.2	14487717	14487786	69	5	0.1351	0.7744	-0.6393	-24.2136	Hypo		NC_019464.2	44406724	44406953	229	21	0.6038	0.2143	0.3896	90.6521	Hyper
NC_019480.2	8648928	8649020	92	9	0.0875	0.7248	-0.6373	-58.5291	Hypo		NC_019476.2	34149	34586	437	19	0.5497	0.1597	0.39	105.748	Hyper
NC_019479.2	38229652	38229709	57	5	0.0824	0.7196	-0.6372	-26.2039	Hypo		NC_019471.2	60318874	60319061	187	20	0.584	0.1933	0.3906	87.004	Hyper
NC_019473.2	65230874	65230990	116	6	0.1213	0.7584	-0.6371	-29.0882	Hypo		NC_019472.2	80528102	80528163	61	5	0.7113	0.3187	0.3926	14.6528	Hyper
NC_019481.2	34368936	34369036	100	5	0.124	0.7611	-0.6371	-24.1443	Hypo		NC_019460.2	61749706	61749887	181	18	0.5479	0.1553	0.3926	81.0309	Hyper
NC_019467.2	83498959	83499060	101	4	0.1234	0.7591	-0.6356	-16.9163	Hypo		NC_019473.2	2087480	2087616	136	4	0.5642	0.1702	0.394	20.2267	Hyper
NC_019464.2	49712788	49712869	81	5	0.105	0.7403	-0.6353	-23.1718	Hypo		NC_019480.2	45482739	45482813	74	5	0.5432	0.1491	0.3941	17.244	Hyper
NC_019479.2	50308153	50308236	83	5	0.1071	0.7421	-0.6351	-23.8218	Hypo		NC_019481.2	28242357	28242430	73	4	0.521	0.1267	0.3943	13.444	Hyper
NC_019473.2	58384654	58384755	101	5	0.0935	0.7284	-0.6348	-24.2737	Hypo		NC_019467.2	84427029	84427322	293	21	0.5016	0.1072	0.3945	101.646	Hyper
NC_019461.2	117005401	117005492	91	6	0.1589	0.7937	-0.6347	-34.1214	Hypo		NC_019476.2	17702138	17702243	105	14	0.7334	0.3389	0.3945	49.27	Hyper
NC_019484.2	77378990	77379067	77	6	0.0981	0.7322	-0.6341	-31.5085	Hypo		NC_019471.2	13047008	13047107	99	7	0.5504	0.1551	0.3952	25.0375	Hyper
NC_019478.2	32426264	32426370	106	5	0.1375	0.7709	-0.6334	-23.066	Hypo		NC_019462.2	13409926	13410107	181	16	0.5203	0.125	0.3954	68.2156	Hyper
NC_019470.2	56892797	56892870	73	5	0.13	0.7631	-0.633	-22.9094	Hypo		NC_019462.2	5211909	5212099	190	27	0.4539	0.0582	0.3956	153.571	Hyper
NC_019472.2	62814858	62814925	67	5	0.1013	0.7343	-0.633	-23.2357	Hypo		NC_019460.2	16674106	16674188	82	7	0.5311	0.1354	0.3957	29.762	Hyper
NC_019480.2	667555	667732	177	4	0.1601	0.7928	-0.6326	-16.4229	Hypo		NC_019477.2	50708233	50708380	147	22	0.6247	0.2279	0.3968	98.0258	Hyper
NC_019465.2	90395273	90395422	149	12	0.0954	0.7277	-0.6324	-87.5892	Hypo		NC_019476.2	7643387	7643446	59	7	0.5455	0.1474	0.3981	25.7838	Hyper
NC_019474.2	51224596	51224683	87	6	0.1377	0.769	-0.6313	-39.1643	Hypo		NC_019462.2	48290671	48290723	52	4	0.7018	0.3036	0.3982	14.0157	Hyper
NC_019464.2	29366979	29367085	106	8	0.118	0.749	-0.631	-44.0408	Hypo		NC_019460.2	220493467	220493573	106	13	0.5734	0.1751	0.3983	48.0763	Hyper
NC_019462.2	59831753	59835642	3889	5	0.1115	0.7423	-0.6309	-27.0019	Hypo		NC_019471.2	23678113	23678252	139	13	0.6655	0.2667	0.3988	47.3973	Hyper
NC_019468.2	36112623	36112705	82	4	0.1163	0.7471	-0.6307	-17.0613	Hypo		NC_019471.2	25133408	25133459	51	7	0.5415	0.1422	0.3993	25.0138	Hyper
NC_019465.2	82392196	82392266	70	5	0.1015	0.7314	-0.6299	-22.6617	Hypo		NC_019465.2	88943303	88943434	131	10	0.5905	0.1912	0.3993	39.6149	Hyper
NC_019477.2	38094565	38094662	97	5	0.144	0.7731	-0.6291	-22.839	Hypo		NC_019466.2	31817142	31817220	78	12	0.7508	0.3514	0.3994	43.0662	Hyper
NC_019467.2	36178250	36178337	87	4	0.1559	0.7841	-0.6282	-16.2102	Hypo		NC_019468.2	52659230	52659358	128	20	0.615	0.215	0.4	88.6731	Hyper
NC_019471.2	4708669	4708742	73	6	0.1544	0.7822	-0.6279	-28.7557	Hypo		NC_019464.2	97002646	97002718	72	8	0.6005	0.1999	0.4006	26.8498	Hyper
NC_019479.2	49740107	49740208	101	6	0.0836	0.7116	-0.6279	-31.8956	Hypo		NC_019479.2	50589599	50589833	234	11	0.6346	0.234	0.4006	45.14	Hyper
NC_019476.2	50868297	50868352	55	6	0.1457	0.7734	-0.6278	-29.1996	Hypo		NC_019476.2	55379723	55379899	176	17	0.7221	0.3215	0.4006	71.3927	Hyper
NC_019464.2	16788392	16788498	106	9	0.1293	0.757	-0.6277	-50.6075	Hypo		NC_019460.2	848169	848263	94	17	0.5893	0.1869	0.4024	71.4713	Hyper
NC_019467.2	13351900	13351956	56	4	0.0785	0.7059	-0.6274	-21.1602	Hypo		NC_019468.2	8018746	8018900	154	11	0.5102	0.1077	0.4025	46.0215	Hyper
NC_019481.2	22771500	22771581	81	5	0.1138	0.7409	-0.627	-24.4302	Hypo		NC_019460.2	4510700	4510818	118	9	0.5388	0.1357	0.4031	29.9769	Hyper
NC_019483.2	13238431	13238507	76	5	0.1339	0.7603	-0.6264	-21.8979	Hypo		NC_019482.2	43640992	43641310	318	18	0.5682	0.1648	0.4034	122.343	Hyper
NC_019464.2	76186947	76191242	4295	10	0.0816	0.7076	-0.626	-56.3276	Hypo		NC_019470.2	36834536	36834743	207	12	0.7231	0.3189	0.4042	56.83	Hyper
NC_019470.2	77490228	77490305	77	5	0.1116	0.7369	-0.6253	-23.6114	Hypo		NC_019467.2	86090501	86090765	264	15	0.5581	0.1537	0.4044	58.6154	Hyper
NC_019470.2	54033293	54033368	75	5	0.1116	0.7369	-0.6253	-23.3596	Hypo		NC_019471.2	34883545	34883689	144	13	0.5754	0.1707	0.4047	49.5661	Hyper
NC_019470.2	72810386	72810454	68	5	0.1116	0.7369	-0.6253	-23.3455	Hypo		NC_019461.2	118434463	118434725	262	20	0.7124	0.3075	0.405	96.3913	Hyper
NC_019483.2	6703991	6704075	84	7	0.1603	0.7854	-0.6251	-34.7555	Hypo		NC_019479.2	38471821	38472098	277	10	0.6738	0.2685	0.4053	50.1596	Hyper
NC_019480.2	30423401	30423499	98	6	0.1095	0.7331	-0.6236	-28.648	Hypo		NC_019460.2	220983379	220983439	60	9	0.6735	0.2682	0.4053	32.3898	Hyper
NC_019473.2	71459914	71460088	174	11	0.1101	0.7333	-0.6232	-67.1508	Hypo		NC_019460.2	9951969	9952136	167	17	0.6502	0.2447	0.4055	69.3383	Hyper
NC_019474.2	45605954	45606048	94	5	0.1284	0.7511	-0.6227	-23.6003	Hypo		NC_019470.2	32622355	32622511	156	14	0.57	0.1635	0.4065	59.0212	Hyper
NC_019471.2	49354489	49354588	99	5	0.0946	0.717	-0.6224	-30.621	Hypo		NC_019478.2	43737170	43737275	105	18	0.649	0.2424	0.4066	81.567	Hyper
NC_019469.2	45271090	45271169	79	8	0.109	0.7312	-0.6222	-43.7698	Hypo		NC_019475.2	63120299	63120468	169	11	0.7462	0.3396	0.4066	50.2314	Hyper
NC_019467.2	85723714	85723816	102	9	0.1318	0.7535	-0.6217	-49.4114	Hypo		NC_019470.2	9993213	9993298	85	13	0.5997	0.1927	0.407	48.5406	Hyper
NC_019464.2	8149642	8149729	87	4	0.1094	0.731	-0.6216	-16.5589	Hypo		NC_019476.2	48523244	48524659	1415	12	0.7386	0.3313	0.4073	40.7241	Hyper
NC_019480.2	1290476	1290551	75	5	0.1136	0.735	-0.6215	-22.5232	Hypo		NC_019461.2	111014108	111014297	189	14	0.5264	0.1181	0.4083	67.2396	Hyper
NC_019481.2	4217874	4217945	71	5	0.14	0.7611	-0.6212	-22.5864	Hypo		NC_019476.2	54886063	54886204	141	10	0.639	0.2304	0.4085	32.3524	Hyper
NC_019471.2	57398820	57398898	78	7	0.138	0.7585	-0.6205	-35.1202	Hypo		NC_019474.2	52151846	52151947	101	4	0.7228	0.3135	0.4094	13.3523	Hyper
NC_019469.2	29352983	29353104	121	6	0.1158	0.7363	-0.6205	-33.1531	Hypo		NC_019469.2	77447259	77447340	81	5	0.5394	0.1294	0.4099	17.9468	Hyper
NC_019473.2	2318430	2318520	90	5	0.0935	0.7138	-0.6203	-23.0921	Hypo		NC_019468.2	55008817	55008890	73	4	0.4937	0.0824	0.4113	14.274	Hyper
NC_019468.2	18796768	18796864	96	10	0.118	0.7381	-0.6201	-59.9479	Hypo		NC_019473.2	67542883	67543021	138	15	0.5914	0.1799	0.4115	61.7074	Hyper
NC_019469.2	47797972	47802880	4908	6	0.1009	0.7209	-0.62	-25.6287	Hypo		NC_019462.2	5270324	5270396	72	8	0.6549	0.2429	0.412	28.5587	Hyper
NC_019471.2	34458687	34458777	90	7	0.145	0.7648	-0.6198	-35.6153	Hypo		NC_019468.2	7501402	7501571	169	14	0.5604	0.1479	0.4125	57.6115	Hyper
NC_019460.2	107933671	107933759	88	5	0.1191	0.7389	-0.6198	-23.2798	Hypo		NC_019460.2	359368	359453	85	5	0.8399	0.4269	0.413	19.1438	Hyper
NC_019471.2	34297091	34297191	100	5	0.1312	0.7508	-0.6196	-22.021	Hypo		NC_019466.2	15842914	15843070	156	16	0.5844	0.1714	0.413	65.9951	Hyper
NC_019475.2	4446227	4446399	172	5	0.1643	0.7836	-0.6194	-25.9069	Hypo		NC_019460.2	80182891	80183066	175	16	0.5728	0.1594	0.4134	71.3299	Hyper
NC_019470.2	30713041	30713130	89	5	0.1178	0.7369	-0.619	-22.7807	Hypo		NC_019460.2	222922380	222922495	115	9	0.6042	0.1906	0.4136	28.7802	Hyper
NC_019474.2	16602864	16602960	96	8	0.1435	0.7621	-0.6187	-43.6563	Hypo		NC_019468.2	36142342	36142417	75	8	0.5587	0.145	0.4137	30.315	Hyper
NC_019477.2	47421859	47421948	89	4	0.0915	0.71	-0.6185	-17.5769	Hypo		NC_019472.2	54102453	54102509	56	5	0.6561	0.2422	0.4139	17.1709	Hyper
NC_019467.2	15567790	15567935	145	6	0.1173	0.7355	-0.6182	-28.0892	Hypo		NC_019459.2	246285402	246285461	59	10	0.7484	0.3341	0.4142	37.8494	Hyper
NC_019468.2	61684896	61684952	56	6	0.1374	0.7552	-0.6178	-27.6734	Hypo		NC_019476.2	52521740	52521880	140	12	0.7345	0.3203	0.4142	44.3372	Hyper
NC_019471.2	10806582	10806691	109	7	0.1317	0.7494	-0.6177	-35.0315	Hypo		NC_019475.2	20813004	20813315	311	23	0.7738	0.3594	0.4144	116.741	Hyper
NC_019478.2	32093944	32094015	71	5	0.1785	0.796	-0.6175	-23.1562	Hypo		NC_019476.2	802552	802678	126	8	0.5298	0.1154	0.4144	30.8091	Hyper
NC_019469.2	74383127	74383185	58	4	0.1237	0.7408	-0.6171	-16.184	Hypo		NC_019474.2	69755852	69756007	155	14	0.4758	0.0613	0.4145	74.9468	Hyper
NC_019482.2	33889828	33889883	55	7	0.0897	0.7066	-0.6169	-37.4091	Hypo		NC_019469.2	78094198	78094281	83	9	0.6119	0.1971	0.4148	31.2035	Hyper
NC_019470.2	61083147	61083248	101	5	0.0729	0.6897	-0.6168	-24.5917	Hypo		NC_019460.2	934721	934995	274	17	0.6307	0.2157	0.415	74.9681	Hyper
NC_019471.2	40870424	40870508	84	7	0.1229	0.7396	-0.6167	-36.0003	Hypo		NC_019461.2	116201945	116202153	208	17	0.5746	0.1593	0.4153	81.6599	Hyper
NC_019482.2	930017	930109	92	6	0.1155	0.7317	-0.6162	-28.5432	Hypo		NC_019477.2	50933496	50933617	121	13	0.5271	0.1115	0.4157	57.9007	Hyper
NC_019468.2	47352935	47353008	73	9	0.1339	0.7498	-0.6159	-48.9622	Hypo		NC_019470.2	75224034	75224127	93	7	0.5612	0.1453	0.4159	22.192	Hyper
NC_019483.2	13815883	13815967	84	8	0.1174	0.7329	-0.6155	-41.7806	Hypo		NC_019475.2	66251979	66252081	102	17	0.6258	0.2098	0.416	70.4735	Hyper
NC_019460.2	77673167	77673262	95	4	0.1148	0.73	-0.6152	-16.3792	Hypo		NC_019473.2	3996433	3996588	155	13	0.7393	0.3228	0.4165	49.6955	Hyper
NC_019476.2	50798460	50798645	185	6	0.1957	0.8108	-0.6151	-28.068	Hypo		NC_019475.2	34276058	34276165	107	4	0.4829	0.0662	0.4166	16.2663	Hyper
NC_019468.2	34513066	34513167	101	5	0.1242	0.7384	-0.6142	-21.4228	Hypo		NC_019484.2	13642584	13642685	101	20	0.6911	0.2742	0.4169	93.5645	Hyper
NC_019459.2	60235098	60235210	112	9	0.167	0.7811	-0.614	-47.5883	Hypo		NC_019460.2	208482567	208482746	179	20	0.6661	0.2487	0.4174	95.9009	Hyper
NC_019476.2	13624094	13624176	82	7	0.1194	0.733	-0.6137	-40.5845	Hypo		NC_019460.2	1319183	1319403	220	17	0.5488	0.1314	0.4174	79.7507	Hyper
NC_019460.2	1647540	1647628	88	6	0.096	0.7094	-0.6134	-30.5732	Hypo		NC_019461.2	92234320	92234441	121	10	0.7227	0.3049	0.4178	39.0892	Hyper
NC_019471.2	60421300	60421396	96	4	0.1145	0.7276	-0.613	-16.3859	Hypo		NC_019466.2	15568131	15568483	352	28	0.5586	0.1408	0.4178	179.824	Hyper
NC_019459.2	185493296	185493363	67	5	0.1466	0.759	-0.6124	-21.3348	Hypo		NC_019462.2	15684752	15684816	64	7	0.5475	0.1285	0.419	24.3594	Hyper
NC_019459.2	240414410	240414558	148	7	0.1074	0.7194	-0.612	-38.5032	Hypo		NC_019471.2	5112385	5112472	87	8	0.5963	0.1772	0.4191	26.5887	Hyper
NC_019468.2	32544446	32544655	209	13	0.1222	0.7337	-0.6115	-93.2355	Hypo		NC_019462.2	43077152	43077236	84	9	0.6804	0.2608	0.4196	30.1143	Hyper
NC_019481.2	25732603	25732693	90	5	0.1502	0.7611	-0.611	-21.6657	Hypo		NC_019478.2	49303959	49304088	129	12	0.593	0.173	0.42	46.7303	Hyper
NC_019468.2	52360674	52360856	182	6	0.0968	0.7076	-0.6108	-30.5524	Hypo		NC_019470.2	53621576	53621779	203	13	0.5333	0.113	0.4203	62.1332	Hyper
NC_019465.2	48037869	48037949	80	5	0.092	0.7024	-0.6105	-22.5775	Hypo		NC_019471.2	51953704	51953765	61	6	0.6638	0.2434	0.4204	20.9979	Hyper
NC_019461.2	102560745	102560833	88	5	0.1445	0.7548	-0.6104	-21.4496	Hypo		NC_019476.2	50939170	50939328	158	12	0.5827	0.1624	0.4204	47.9015	Hyper
NC_019468.2	35602928	35603037	109	7	0.0722	0.6822	-0.61	-38.9965	Hypo		NC_019479.2	12378262	12378319	57	6	0.5125	0.0921	0.4205	22.6123	Hyper
NC_019460.2	213798826	213798917	91	5	0.1019	0.7114	-0.6095	-22.6905	Hypo		NC_019462.2	18757645	18757800	155	11	0.4957	0.0751	0.4206	50.8271	Hyper
NC_019469.2	59441015	59441075	60	5	0.1407	0.7497	-0.609	-20.7934	Hypo		NC_019468.2	24983020	24983095	75	4	0.5693	0.1479	0.4214	12.2829	Hyper
NC_019480.2	49916387	49916552	165	9	0.1063	0.7148	-0.6085	-49.5315	Hypo		NC_019478.2	44751343	44751574	231	17	0.6387	0.2166	0.4221	72.3764	Hyper
NC_019476.2	23427600	23427697	97	6	0.1683	0.7767	-0.6083	-31.8004	Hypo		NC_019480.2	844232	844302	70	5	0.5152	0.0927	0.4225	21.254	Hyper
NC_019460.2	214523923	214524007	84	5	0.1314	0.7394	-0.608	-21.0275	Hypo		NC_019460.2	1671378	1671489	111	12	0.6612	0.2387	0.4225	47.7426	Hyper
NC_019460.2	2224412	2224467	55	5	0.1314	0.7394	-0.608	-21.0273	Hypo		NC_019460.2	103151959	103152031	72	7	0.7048	0.2822	0.4226	22.9053	Hyper
NC_019460.2	178630324	178630462	138	6	0.1965	0.8042	-0.6077	-34.0456	Hypo		NC_019460.2	378029	378263	234	11	0.6818	0.2592	0.4227	47.3549	Hyper
NC_019473.2	71519888	71519973	85	6	0.1043	0.7118	-0.6075	-27.2683	Hypo		NC_019460.2	222832574	222832659	85	5	0.5412	0.1184	0.4228	17.153	Hyper
NC_019466.2	83380584	83380670	86	5	0.1115	0.719	-0.6075	-21.2109	Hypo		NC_019473.2	4642573	4642653	80	4	0.5575	0.1341	0.4234	11.8581	Hyper
NC_019471.2	24722371	24722494	123	5	0.1192	0.7264	-0.6072	-26.7087	Hypo		NC_019468.2	52567083	52567199	116	10	0.5679	0.1437	0.4243	36.1717	Hyper
NC_019483.2	34518193	34518296	103	7	0.0494	0.6564	-0.607	-43.4787	Hypo		NC_019478.2	48268554	48268894	340	15	0.61	0.1854	0.4246	64.8214	Hyper
NC_019464.2	82006398	82006509	111	9	0.079	0.6858	-0.6068	-57.425	Hypo		NC_019459.2	24141755	24141822	67	7	0.5726	0.1478	0.4248	22.3115	Hyper
NC_019466.2	17167204	17167315	111	5	0.074	0.6808	-0.6068	-23.9991	Hypo		NC_019471.2	13843565	13843794	229	16	0.6243	0.1992	0.4251	76.0154	Hyper
NC_019480.2	60458506	60458602	96	8	0.1266	0.7331	-0.6065	-39.9196	Hypo		NC_019476.2	58656314	58656623	309	12	0.5807	0.155	0.4258	46.6062	Hyper
NC_019462.2	13692175	13692273	98	6	0.1438	0.7501	-0.6062	-26.8453	Hypo		NC_019477.2	17630276	17630350	74	6	0.5637	0.1376	0.4261	21.4565	Hyper
NC_019460.2	120997790	120997917	127	8	0.0844	0.6904	-0.6061	-51.0087	Hypo		NC_019478.2	8770050	8770143	93	6	0.5747	0.1486	0.4261	19.8063	Hyper
NC_019468.2	34145735	34145794	59	5	0.1323	0.7384	-0.606	-20.7169	Hypo		NC_019484.2	51072866	51072955	89	4	0.5138	0.0877	0.4261	13.0824	Hyper
NC_019460.2	202852832	202852920	88	7	0.1262	0.7315	-0.6053	-33.5196	Hypo		NC_019475.2	27887	28044	157	8	0.6251	0.1988	0.4263	32.7805	Hyper
NC_019461.2	76657555	76657645	90	6	0.1384	0.7425	-0.6041	-27.3461	Hypo		NC_019475.2	21888572	21888633	61	5	0.6311	0.2047	0.4264	16.754	Hyper
NC_019460.2	101342445	101342539	94	6	0.1327	0.7363	-0.6036	-26.8943	Hypo		NC_019468.2	46460200	46460269	69	4	0.5407	0.114	0.4267	15.5772	Hyper
NC_019478.2	49852208	49852292	84	6	0.1389	0.7417	-0.6028	-26.9949	Hypo		NC_019476.2	32618979	32619112	133	12	0.5773	0.1505	0.4268	49.6002	Hyper
NC_019468.2	35877680	35877734	54	8	0.1585	0.7613	-0.6028	-41.5332	Hypo		NC_019483.2	11905693	11905775	82	8	0.7663	0.339	0.4273	24.8557	Hyper
NC_019465.2	88944145	88944521	376	12	0.1101	0.7127	-0.6026	-67.9986	Hypo		NC_019484.2	77559848	77562118	2270	18	0.5996	0.1719	0.4277	83.9339	Hyper
NC_019473.2	62555875	62556006	131	11	0.1198	0.7222	-0.6024	-65.4675	Hypo		NC_019482.2	7310153	7310252	99	7	0.5127	0.0849	0.4278	36.5446	Hyper
NC_019476.2	5608400	5608481	81	9	0.1734	0.7758	-0.6024	-46.8797	Hypo		NC_019462.2	7684519	7684620	101	9	0.5874	0.1595	0.4279	32.4998	Hyper
NC_019473.2	2540910	2541002	92	7	0.1137	0.7156	-0.6019	-37.6974	Hypo		NC_019468.2	38853748	38853897	149	15	0.5538	0.1257	0.4281	69.6528	Hyper
NC_019479.2	46145657	46145746	89	6	0.1098	0.7116	-0.6018	-27.6693	Hypo		NC_019481.2	623	771	148	5	0.7365	0.3084	0.4282	24.7601	Hyper
NC_019468.2	61532429	61532557	128	10	0.1368	0.7384	-0.6015	-54.1372	Hypo		NC_019477.2	12051914	12052096	182	8	0.5852	0.1558	0.4294	25.778	Hyper
NC_019469.2	68933770	68933859	89	4	0.058	0.6594	-0.6014	-20.1807	Hypo		NC_019466.2	59854137	59854268	131	11	0.5632	0.1338	0.4294	47.9242	Hyper
NC_019472.2	41594955	41595014	59	6	0.0999	0.7006	-0.6007	-31.9376	Hypo		NC_019461.2	117370625	117370896	271	5	0.6359	0.2063	0.4296	21.0839	Hyper
NC_019470.2	53008400	53012883	4483	37	0.1806	0.781	-0.6004	-339.709	Hypo		NC_019479.2	8765813	8765876	63	5	0.6505	0.2207	0.4298	16.8045	Hyper
NC_019476.2	55515977	55516278	301	13	0.2131	0.8132	-0.6001	-78.2982	Hypo		NC_019470.2	62460736	62460801	65	4	0.5751	0.1453	0.4298	12.5936	Hyper
NC_019480.2	1000891	1001072	181	15	0.1136	0.7134	-0.5999	-106.588	Hypo		NC_019478.2	46762067	46762464	397	35	0.7368	0.3069	0.4299	221.257	Hyper
NC_019460.2	136973335	136973433	98	5	0.1401	0.7394	-0.5993	-20.3108	Hypo		NC_019462.2	105826412	105826523	111	9	0.6334	0.2034	0.43	29.2845	Hyper
NC_019468.2	16179573	16179631	58	5	0.0933	0.6925	-0.5991	-25.7038	Hypo		NC_019471.2	36131289	36131441	152	9	0.6491	0.2187	0.4304	31.9841	Hyper
NC_019483.2	25110244	25110543	299	11	0.1112	0.7097	-0.5985	-57.687	Hypo		NC_019481.2	41788792	41789133	341	29	0.5643	0.1338	0.4306	166.839	Hyper
NC_019464.2	9979751	9979826	75	6	0.0991	0.6973	-0.5983	-31.3231	Hypo		NC_019461.2	114793852	114793941	89	5	0.5215	0.0906	0.4309	17.6849	Hyper
NC_019481.2	25057136	25057228	92	7	0.1561	0.7536	-0.5976	-32.9069	Hypo		NC_019476.2	46796776	46798522	1746	10	0.6144	0.1832	0.4312	39.1215	Hyper
NC_019459.2	55274365	55276213	1848	11	0.2828	0.8802	-0.5973	-66.1717	Hypo		NC_019460.2	4171390	4171458	68	6	0.484	0.0522	0.4318	31.0266	Hyper
NC_019472.2	72431896	72432009	113	8	0.1504	0.7475	-0.5971	-41.5842	Hypo		NC_019479.2	50340266	50340324	58	4	0.5513	0.1192	0.432	15.643	Hyper
NC_019468.2	58981335	58981413	78	6	0.0907	0.6879	-0.5971	-32.2348	Hypo		NC_019460.2	219723738	219723873	135	10	0.5298	0.0969	0.4329	40.571	Hyper
NC_019468.2	11078172	11078258	86	6	0.1254	0.7224	-0.597	-26.3377	Hypo		NC_019467.2	29961914	29962065	151	12	0.6482	0.215	0.4332	46.1905	Hyper
NC_019464.2	64177290	64177466	176	8	0.1378	0.7344	-0.5966	-44.0316	Hypo		NC_019474.2	66189984	66190046	62	5	0.5193	0.086	0.4333	20.7968	Hyper
NC_019473.2	37529486	37529575	89	7	0.0738	0.6704	-0.5965	-41.1952	Hypo		NC_019471.2	4693599	4693778	179	20	0.5991	0.1658	0.4333	101.313	Hyper
NC_019460.2	2948936	2949046	110	12	0.1157	0.711	-0.5954	-73.3023	Hypo		NC_019477.2	8292244	8292396	152	7	0.5835	0.1492	0.4342	21.521	Hyper
NC_019460.2	223203853	223203945	92	5	0.0988	0.6927	-0.5939	-22.4284	Hypo		NC_019470.2	45646294	45646410	116	13	0.5739	0.1396	0.4343	53.9704	Hyper
NC_019480.2	42161388	42161472	84	5	0.0941	0.6875	-0.5934	-24.485	Hypo		NC_019475.2	56586656	56586910	254	12	0.5683	0.1337	0.4346	57.2435	Hyper
NC_019464.2	97930989	97938036	7047	18	0.1209	0.7138	-0.5929	-82.7323	Hypo		NC_019461.2	118804296	118804356	60	5	0.6971	0.2625	0.4347	23.2137	Hyper
NC_019470.2	27402312	27402413	101	6	0.1141	0.7066	-0.5925	-26.5292	Hypo		NC_019460.2	133574652	133574705	53	5	0.5213	0.0866	0.4347	17.3687	Hyper
NC_019470.2	33117751	33117811	60	6	0.1141	0.7066	-0.5925	-26.5278	Hypo		NC_019478.2	48901556	48901719	163	17	0.6323	0.1975	0.4349	77.8122	Hyper
NC_019467.2	36855216	36855291	75	4	0.0785	0.6711	-0.5925	-19.3056	Hypo		NC_019471.2	48678622	48678795	173	18	0.656	0.2198	0.4362	93.6806	Hyper
NC_019481.2	2967390	2967466	76	5	0.128	0.7204	-0.5924	-21.2671	Hypo		NC_019465.2	88704502	88704651	149	11	0.5467	0.1098	0.4368	45.3492	Hyper
NC_019468.2	11235558	11235641	83	5	0.1916	0.7831	-0.5915	-23.8718	Hypo		NC_019480.2	2296255	2296347	92	14	0.7154	0.2781	0.4373	57.1776	Hyper
NC_019468.2	16574739	16574883	144	8	0.0811	0.6724	-0.5914	-49.1333	Hypo		NC_019471.2	48714034	48714147	113	7	0.5026	0.0652	0.4374	29.1587	Hyper
NC_019477.2	8492400	8492528	128	7	0.1185	0.7097	-0.5912	-39.4489	Hypo		NC_019459.2	247514372	247514465	93	9	0.5323	0.0949	0.4374	30.1611	Hyper
NC_019464.2	96313123	96313224	101	7	0.1226	0.7137	-0.5911	-37.8868	Hypo		NC_019459.2	232643589	232643845	256	10	0.5137	0.0757	0.438	39.754	Hyper
NC_019477.2	27430318	27430395	77	6	0.1665	0.7573	-0.5908	-25.1829	Hypo		NC_019468.2	61208845	61208982	137	18	0.5839	0.145	0.4389	87.5912	Hyper
NC_019466.2	14590422	14590507	85	5	0.1115	0.7023	-0.5908	-20.0023	Hypo		NC_019468.2	7748877	7749043	166	10	0.5679	0.128	0.4399	39.3346	Hyper
NC_019468.2	55408033	55408098	65	5	0.1012	0.6915	-0.5903	-21.1496	Hypo		NC_019459.2	247666187	247666273	86	6	0.5829	0.143	0.4399	20.0047	Hyper
NC_019477.2	49720340	49720413	73	4	0.1199	0.71	-0.5902	-15.3284	Hypo		NC_019460.2	6297400	6297520	120	6	0.5101	0.0698	0.4403	23.1343	Hyper
NC_019474.2	50785163	50785229	66	6	0.1145	0.7045	-0.59	-28.2132	Hypo		NC_019464.2	99191095	99191180	85	7	0.6009	0.1602	0.4407	26.2836	Hyper
NC_019467.2	83665290	83665390	100	10	0.1234	0.7133	-0.5899	-54.3462	Hypo		NC_019461.2	117370950	117371878	928	10	0.6673	0.2263	0.441	35.4041	Hyper
NC_019481.2	25019856	25019956	100	6	0.143	0.7327	-0.5897	-26.1728	Hypo		NC_019460.2	583988	584041	53	7	0.6698	0.2286	0.4412	25.414	Hyper
NC_019481.2	3829016	3829116	100	6	0.143	0.7327	-0.5897	-26.1721	Hypo		NC_019467.2	84479818	84479902	84	6	0.5836	0.1424	0.4412	18.7227	Hyper
NC_019481.2	41175940	41176028	88	4	0.143	0.7327	-0.5897	-15.0185	Hypo		NC_019471.2	1961138	1963413	2275	10	0.7641	0.3224	0.4417	35.6381	Hyper
NC_019460.2	161945587	161945680	93	10	0.1499	0.7394	-0.5895	-51.9038	Hypo		NC_019460.2	4365670	4365807	137	6	0.572	0.1302	0.4418	21.9494	Hyper
NC_019470.2	81345559	81345625	66	8	0.1176	0.7066	-0.589	-39.198	Hypo		NC_019462.2	5058430	5058524	94	5	0.5918	0.1499	0.442	15.0376	Hyper
NC_019461.2	118033073	118033192	119	9	0.1164	0.7048	-0.5884	-53.6796	Hypo		NC_019462.2	6615846	6615917	71	5	0.5918	0.1499	0.442	15.031	Hyper
NC_019471.2	1066486	1066577	91	7	0.1766	0.7648	-0.5882	-30.8434	Hypo		NC_019468.2	52199381	52199501	120	8	0.6108	0.1687	0.4421	29.7544	Hyper
NC_019471.2	7363858	7363961	103	5	0.1392	0.7273	-0.5881	-23.8075	Hypo		NC_019460.2	1354496	1354896	400	23	0.5862	0.1437	0.4424	124.559	Hyper
NC_019461.2	102277243	102277344	101	8	0.1384	0.7262	-0.5879	-38.8156	Hypo		NC_019467.2	34444760	34444908	148	6	0.5807	0.1381	0.4426	18.8579	Hyper
NC_019469.2	3748590	3748819	229	8	0.1333	0.7209	-0.5876	-37.9822	Hypo		NC_019468.2	42034055	42034160	105	10	0.6122	0.1695	0.4427	38.2589	Hyper
NC_019483.2	4866988	4867102	114	10	0.1753	0.7628	-0.5874	-54.4355	Hypo		NC_019459.2	241738363	241738428	65	5	0.545	0.1017	0.4433	15.1575	Hyper
NC_019480.2	25879323	25879453	130	10	0.1029	0.6898	-0.5869	-55.6729	Hypo		NC_019472.2	44465191	44465323	132	7	0.5489	0.1053	0.4435	26.5107	Hyper
NC_019460.2	74277717	74277778	61	7	0.1446	0.7315	-0.5869	-31.0735	Hypo		NC_019460.2	212211976	212212028	52	6	0.5929	0.1494	0.4435	18.0126	Hyper
NC_019464.2	76138921	76138973	52	4	0.0495	0.6359	-0.5864	-19.3824	Hypo		NC_019475.2	20808027	20808120	93	10	0.6332	0.1895	0.4436	41.2767	Hyper
NC_019467.2	49760737	49760995	258	23	0.1074	0.6932	-0.5858	-251.48	Hypo		NC_019462.2	41546785	41546950	165	13	0.6616	0.2176	0.444	52.8757	Hyper
NC_019474.2	17445333	17445395	62	4	0.2433	0.8284	-0.5851	-18.7062	Hypo		NC_019471.2	13155304	13155420	116	9	0.541	0.0965	0.4445	38.5488	Hyper
NC_019477.2	50319226	50319315	89	6	0.1482	0.733	-0.5848	-25.4094	Hypo		NC_019459.2	246997865	246997957	92	6	0.6213	0.1765	0.4448	20.5659	Hyper
NC_019472.2	45904982	45905166	184	12	0.119	0.7037	-0.5848	-68.3998	Hypo		NC_019478.2	45838661	45838717	56	8	0.5725	0.1275	0.445	34.1624	Hyper
NC_019472.2	3893169	3893248	79	6	0.119	0.7037	-0.5848	-25.4144	Hypo		NC_019483.2	658008	658161	153	15	0.7361	0.2911	0.445	66.3074	Hyper
NC_019472.2	72957579	72957666	87	4	0.119	0.7037	-0.5848	-14.5831	Hypo		NC_019478.2	48937656	48937777	121	7	0.6022	0.1571	0.4451	35.1169	Hyper
NC_019466.2	75848151	75848283	132	5	0.0918	0.6765	-0.5847	-24.9467	Hypo		NC_019470.2	74127076	74127136	60	5	0.5916	0.1462	0.4454	15.2078	Hyper
NC_019483.2	32625454	32625552	98	5	0.1149	0.6984	-0.5834	-19.8518	Hypo		NC_019478.2	49305531	49305760	229	8	0.7591	0.3133	0.4458	39.5633	Hyper
NC_019462.2	43798997	43799131	134	6	0.1189	0.7021	-0.5832	-25.711	Hypo		NC_019464.2	74063660	74063756	96	6	0.5614	0.1152	0.4462	21.6665	Hyper
NC_019484.2	6429178	6429275	97	8	0.1566	0.7398	-0.5832	-43.8264	Hypo		NC_019459.2	243592386	243592466	80	6	0.543	0.0968	0.4462	19.0378	Hyper
NC_019460.2	180240555	180240704	149	6	0.1262	0.7094	-0.5832	-25.3723	Hypo		NC_019462.2	273129	273330	201	10	0.5872	0.1407	0.4465	45.1066	Hyper
NC_019476.2	2332851	2332930	79	6	0.1683	0.7512	-0.5828	-24.8014	Hypo		NC_019478.2	49473678	49473780	102	9	0.6734	0.2269	0.4465	35.1259	Hyper
NC_019466.2	94116377	94116455	78	5	0.1196	0.7023	-0.5827	-19.3013	Hypo		NC_019483.2	2939885	2939982	97	6	0.5941	0.1476	0.4465	18.948	Hyper
NC_019460.2	8999925	9000115	190	11	0.1304	0.713	-0.5826	-71.0253	Hypo		NC_019474.2	70849843	70849989	146	11	0.6165	0.1697	0.4468	46.083	Hyper
NC_019481.2	2304576	2304671	95	4	0.1106	0.6932	-0.5825	-17.5091	Hypo		NC_019468.2	7956857	7956950	93	5	0.6268	0.18	0.4468	16.1078	Hyper
NC_019472.2	21822169	21822279	110	11	0.1029	0.6848	-0.5819	-66.8997	Hypo		NC_019476.2	60341842	60341943	101	10	0.6963	0.2494	0.4469	38.1559	Hyper
NC_019471.2	43380258	43380346	88	12	0.0942	0.6756	-0.5813	-74.8367	Hypo		NC_019476.2	21136729	21136831	102	9	0.7568	0.3098	0.447	30.1445	Hyper
NC_019460.2	165522644	165522729	85	6	0.1114	0.6926	-0.5811	-29.1954	Hypo		NC_019464.2	97965678	97965796	118	12	0.5807	0.1336	0.4471	50.4054	Hyper
NC_019475.2	59728574	59728660	86	7	0.1125	0.6935	-0.581	-32.9421	Hypo		NC_019476.2	59912811	59912944	133	17	0.6629	0.2156	0.4473	79.8155	Hyper
NC_019466.2	74142794	74142895	101	4	0.1586	0.7387	-0.5801	-13.5954	Hypo		NC_019474.2	47900922	47901069	147	21	0.6782	0.2306	0.4476	114.367	Hyper
NC_019477.2	10736899	10736998	99	7	0.1283	0.7072	-0.5789	-31.3121	Hypo		NC_019479.2	48157711	48157771	60	4	0.5397	0.092	0.4476	12.5245	Hyper
NC_019460.2	96173792	96173865	73	5	0.1191	0.6979	-0.5788	-23.0711	Hypo		NC_019474.2	63212842	63212957	115	9	0.6012	0.1536	0.4477	39.1347	Hyper
NC_019470.2	44248380	44248469	89	6	0.1103	0.689	-0.5787	-31.8991	Hypo		NC_019468.2	36004567	36004665	98	8	0.6605	0.2126	0.4478	32.5035	Hyper
NC_019476.2	50066851	50066941	90	14	0.2505	0.8289	-0.5784	-81.4878	Hypo		NC_019459.2	246052188	246052290	102	13	0.604	0.1562	0.4479	53.8529	Hyper
NC_019484.2	4312636	4312768	132	7	0.0732	0.6513	-0.5782	-41.0576	Hypo		NC_019477.2	46916371	46916476	105	12	0.6167	0.1683	0.4485	45.6008	Hyper
NC_019472.2	20887680	20887775	95	5	0.1255	0.7037	-0.5781	-23.1443	Hypo		NC_019478.2	45538026	45538126	100	12	0.5819	0.1334	0.4485	54.1224	Hyper
NC_019481.2	13300702	13301127	425	20	0.1571	0.7344	-0.5772	-150.673	Hypo		NC_019477.2	48307908	48307975	67	7	0.6091	0.1602	0.449	23.7051	Hyper
NC_019460.2	18344360	18344529	169	6	0.0767	0.6535	-0.5768	-31.5554	Hypo		NC_019468.2	31710463	31712167	1704	15	0.6461	0.1968	0.4493	62.9911	Hyper
NC_019471.2	10999029	10999149	120	11	0.1923	0.769	-0.5767	-60.4797	Hypo		NC_019464.2	44311157	44311212	55	6	0.6215	0.1719	0.4496	19.4841	Hyper
NC_019460.2	210877772	210877839	67	4	0.1327	0.7094	-0.5767	-14.1482	Hypo		NC_019471.2	60148189	60148288	99	6	0.5953	0.1456	0.4497	18.4865	Hyper
NC_019478.2	24254707	24254804	97	6	0.1258	0.702	-0.5761	-25.1499	Hypo		NC_019462.2	15638946	15639031	85	6	0.5918	0.1421	0.4497	18.4363	Hyper
NC_019469.2	77681338	77681452	114	10	0.1941	0.7701	-0.576	-53.1033	Hypo		NC_019462.2	13058122	13058214	92	5	0.5918	0.1421	0.4497	15.6473	Hyper
NC_019470.2	67305954	67306054	100	6	0.1313	0.7066	-0.5753	-24.5928	Hypo		NC_019476.2	6345101	6345287	186	8	0.601	0.151	0.4501	29.5413	Hyper
NC_019483.2	37433258	37433633	375	24	0.0946	0.6696	-0.575	-224.987	Hypo		NC_019479.2	49119523	49119610	87	10	0.6163	0.1661	0.4503	47.8935	Hyper
NC_019468.2	53260947	53261027	80	4	0.1789	0.7529	-0.574	-18.7693	Hypo		NC_019465.2	88210100	88210224	124	9	0.6534	0.2031	0.4503	34.149	Hyper
NC_019468.2	38347228	38347318	90	6	0.1053	0.6791	-0.5738	-26.1664	Hypo		NC_019473.2	3463244	3463383	139	8	0.5957	0.145	0.4507	27.5741	Hyper
NC_019471.2	60384395	60384488	93	6	0.133	0.7067	-0.5737	-24.5563	Hypo		NC_019460.2	100734826	100734930	104	9	0.7659	0.3153	0.4507	36.155	Hyper
NC_019460.2	179335544	179335628	84	5	0.1191	0.6927	-0.5736	-19.6931	Hypo		NC_019470.2	29069269	29069362	93	6	0.5916	0.1406	0.451	18.6635	Hyper
NC_019473.2	71427558	71427659	101	4	0.0809	0.6536	-0.5726	-17.7421	Hypo		NC_019461.2	115402326	115402390	64	4	0.5483	0.0965	0.4518	13.0671	Hyper
NC_019472.2	52834746	52834985	239	28	0.0925	0.665	-0.5726	-262.802	Hypo		NC_019466.2	15876756	15877059	303	18	0.6381	0.1863	0.4518	90.2346	Hyper
NC_019483.2	40775908	40775994	86	9	0.1444	0.717	-0.5726	-46.7286	Hypo		NC_019473.2	1719199	1719295	96	6	0.613	0.1609	0.4521	19.8801	Hyper
NC_019476.2	21514606	21514698	92	5	0.151	0.7235	-0.5725	-19.1276	Hypo		NC_019468.2	24589420	24589506	86	8	0.6108	0.1585	0.4523	26.8752	Hyper
NC_019481.2	41364538	41364619	81	8	0.1906	0.7628	-0.5723	-42.8984	Hypo		NC_019461.2	119002306	119002529	223	11	0.5692	0.1167	0.4524	52.6495	Hyper
NC_019472.2	73017434	73021174	3740	19	0.1471	0.7194	-0.5723	-111.543	Hypo		NC_019478.2	10360591	10360675	84	9	0.5888	0.1364	0.4525	34.77	Hyper
NC_019479.2	48909672	48909768	96	5	0.0982	0.6702	-0.572	-23.9386	Hypo		NC_019465.2	73245231	73245326	95	7	0.6092	0.1566	0.4526	24.1515	Hyper
NC_019473.2	29763929	29764036	107	5	0.0629	0.6347	-0.5717	-25.4494	Hypo		NC_019465.2	90146660	90146810	150	16	0.5527	0.0998	0.4529	88.9954	Hyper
NC_019476.2	59739059	59739149	90	6	0.1413	0.7126	-0.5713	-25.1401	Hypo		NC_019468.2	14519546	14519673	127	12	0.6248	0.1717	0.4532	49.1467	Hyper
NC_019462.2	41387957	41388058	101	6	0.1313	0.7021	-0.5709	-24.3548	Hypo		NC_019482.2	5850755	5850933	178	12	0.6213	0.1679	0.4533	51.9381	Hyper
NC_019481.2	39317852	39317948	96	6	0.1467	0.7176	-0.5709	-29.053	Hypo		NC_019475.2	43263557	43263792	235	19	0.5527	0.0994	0.4533	118.679	Hyper
NC_019459.2	82308135	82308236	101	4	0.1389	0.7097	-0.5708	-14.9374	Hypo		NC_019478.2	29712116	29712323	207	6	0.5747	0.1214	0.4534	22.0664	Hyper
NC_019473.2	23604748	23604838	90	6	0.0804	0.65	-0.5696	-30.6264	Hypo		NC_019467.2	35323356	35323719	363	18	0.6682	0.2146	0.4536	102.993	Hyper
NC_019466.2	75203999	75204065	66	4	0.0977	0.667	-0.5694	-16.3865	Hypo		NC_019476.2	21587007	21587104	97	7	0.6107	0.1571	0.4536	22.7916	Hyper
NC_019481.2	24276956	24277086	130	7	0.0833	0.6516	-0.5683	-39.2814	Hypo		NC_019460.2	161702951	161703030	79	8	0.6264	0.1725	0.4539	31.1795	Hyper
NC_019473.2	4131122	4131182	60	4	0.2999	0.8676	-0.5677	-17.0276	Hypo		NC_019473.2	8525108	8525194	86	8	0.5931	0.1391	0.454	28.4307	Hyper
NC_019480.2	60559167	60559303	136	7	0.0948	0.6624	-0.5676	-37.2404	Hypo		NC_019475.2	65475731	65475804	73	12	0.5993	0.1452	0.4541	53.5323	Hyper
NC_019460.2	23392891	23393052	161	10	0.1044	0.672	-0.5676	-56.7224	Hypo		NC_019466.2	56957759	56957850	91	6	0.5921	0.1379	0.4542	23.4258	Hyper
NC_019461.2	101268473	101268566	93	11	0.1963	0.7638	-0.5675	-60.7614	Hypo		NC_019479.2	16015163	16015352	189	10	0.5654	0.1111	0.4544	44.2816	Hyper
NC_019467.2	78477082	78477185	103	8	0.108	0.6755	-0.5675	-36.9842	Hypo		NC_019460.2	210344678	210344929	251	14	0.6134	0.159	0.4544	67.2993	Hyper
NC_019462.2	105726984	105727112	128	8	0.0848	0.6521	-0.5673	-40.6095	Hypo		NC_019460.2	19504749	19504867	118	5	0.5213	0.0663	0.4549	19.0244	Hyper
NC_019470.2	78588222	78588413	191	11	0.1184	0.6852	-0.5667	-67.613	Hypo		NC_019476.2	54559548	54559671	123	4	0.6694	0.2141	0.4553	12.4152	Hyper
NC_019468.2	61536559	61536635	76	7	0.1159	0.6822	-0.5663	-30.3522	Hypo		NC_019474.2	46229018	46229161	143	9	0.6345	0.1787	0.4558	42.4171	Hyper
NC_019478.2	35195653	35196016	363	17	0.2172	0.7834	-0.5661	-98.12	Hypo		NC_019481.2	2098939	2099001	62	4	0.5636	0.1078	0.4559	12.4637	Hyper
NC_019461.2	19281233	19281331	98	7	0.083	0.6477	-0.5647	-38.2213	Hypo		NC_019476.2	57298770	57298871	101	7	0.6361	0.18	0.4562	22.6743	Hyper
NC_019475.2	4566025	4566118	93	6	0.1082	0.6724	-0.5641	-25.2428	Hypo		NC_019478.2	46498230	46498427	197	14	0.5823	0.1259	0.4565	70.452	Hyper
NC_019462.2	105903495	105903622	127	14	0.174	0.7378	-0.5638	-80.7618	Hypo		NC_019460.2	210443437	210443556	119	6	0.6841	0.2276	0.4565	25.4103	Hyper
NC_019477.2	3610519	3610597	78	5	0.1535	0.7154	-0.562	-17.974	Hypo		NC_019478.2	28460624	28460721	97	16	0.6559	0.1992	0.4567	73.1043	Hyper
NC_019466.2	29340363	29340460	97	5	0.0973	0.6592	-0.5619	-19.0865	Hypo		NC_019477.2	49539424	49539568	144	8	0.6016	0.1445	0.4571	31.744	Hyper
NC_019475.2	5466333	5466488	155	9	0.2108	0.7722	-0.5615	-43.3627	Hypo		NC_019461.2	118125610	118125861	251	17	0.5687	0.1116	0.4571	98.9871	Hyper
NC_019480.2	61001120	61001193	73	9	0.1442	0.705	-0.5608	-43.4837	Hypo		NC_019460.2	207244756	207245056	300	17	0.5391	0.0819	0.4572	101.82	Hyper
NC_019460.2	201234071	201234161	90	7	0.1227	0.6834	-0.5607	-29.7903	Hypo		NC_019462.2	48281237	48281310	73	4	0.5475	0.0899	0.4576	12.5137	Hyper
NC_019472.2	34605557	34605657	100	5	0.2418	0.8017	-0.56	-24.5985	Hypo		NC_019461.2	28420510	28420597	87	7	0.605	0.1472	0.4578	24.6771	Hyper
NC_019477.2	48681892	48682091	199	8	0.2266	0.7855	-0.5589	-37.167	Hypo		NC_019480.2	61750027	61750219	192	10	0.609	0.1512	0.4578	47.0878	Hyper
NC_019459.2	158468953	158469047	94	5	0.1459	0.7046	-0.5587	-21.2199	Hypo		NC_019484.2	76787947	76788075	128	4	0.5456	0.0875	0.458	15.1031	Hyper
NC_019474.2	12170292	12170422	130	9	0.0784	0.6369	-0.5585	-48.4928	Hypo		NC_019470.2	57914817	57914912	95	5	0.5916	0.1334	0.4582	16.9263	Hyper
NC_019466.2	87107316	87107415	99	9	0.1568	0.7148	-0.558	-42.9252	Hypo		NC_019460.2	7891504	7891609	105	8	0.6177	0.1592	0.4585	27.3057	Hyper
NC_019469.2	75310975	75311188	213	25	0.0859	0.6437	-0.5578	-227.621	Hypo		NC_019474.2	63140526	63140741	215	16	0.6193	0.1604	0.459	80.4703	Hyper
NC_019471.2	1446735	1446829	94	7	0.1229	0.6804	-0.5575	-29.6797	Hypo		NC_019466.2	7106598	7106694	96	6	0.5916	0.132	0.4596	21.9312	Hyper
NC_019460.2	214185803	214185875	72	6	0.096	0.6535	-0.5575	-28.4939	Hypo		NC_019460.2	96029734	96029833	99	9	0.5841	0.1242	0.4599	36.8086	Hyper
NC_019471.2	39632026	39632159	133	8	0.133	0.6904	-0.5574	-38.8621	Hypo		NC_019460.2	9060414	9063326	2912	23	0.7016	0.2416	0.46	102.854	Hyper
NC_019469.2	77104439	77104535	96	8	0.1166	0.6739	-0.5573	-35.9097	Hypo		NC_019481.2	34584442	34584607	165	8	0.615	0.1549	0.4601	31.0998	Hyper
NC_019466.2	29610355	29610445	90	6	0.1148	0.6718	-0.557	-23.1608	Hypo		NC_019475.2	14317837	14317983	146	8	0.6727	0.2126	0.4601	30.1407	Hyper
NC_019466.2	16282213	16282268	55	6	0.1148	0.6718	-0.557	-23.1604	Hypo		NC_019479.2	49639111	49639309	198	19	0.6082	0.1478	0.4604	118.283	Hyper
NC_019466.2	59213344	59213401	57	4	0.1148	0.6718	-0.557	-13.2892	Hypo		NC_019476.2	59938403	59938479	76	7	0.7209	0.2602	0.4606	26.4133	Hyper
NC_019475.2	19911687	19911816	129	7	0.1333	0.6898	-0.5565	-31.8149	Hypo		NC_019461.2	30671983	30672059	76	4	0.6098	0.149	0.4608	13.493	Hyper
NC_019472.2	63452099	63452151	52	4	0.0756	0.6317	-0.556	-17.1432	Hypo		NC_019470.2	53125242	53125337	95	7	0.5751	0.1141	0.461	24.5118	Hyper
NC_019471.2	4716277	4716370	93	5	0.1126	0.6681	-0.5555	-23.4383	Hypo		NC_019481.2	25934182	25934268	86	6	0.6097	0.1485	0.4612	19.7162	Hyper
NC_019482.2	44978051	44978114	63	4	0.0726	0.6281	-0.5555	-17.6415	Hypo		NC_019478.2	21392017	21392172	155	12	0.5981	0.1367	0.4614	51.4455	Hyper
NC_019467.2	33510981	33511068	87	7	0.1283	0.6838	-0.5555	-35.3619	Hypo		NC_019481.2	39069502	39069560	58	6	0.6097	0.1482	0.4615	19.6808	Hyper
NC_019476.2	29874478	29874580	102	5	0.3354	0.8909	-0.5555	-23.1526	Hypo		NC_019472.2	27576289	27576447	158	13	0.5846	0.1229	0.4617	57.6826	Hyper
NC_019468.2	58187714	58187902	188	15	0.1635	0.7188	-0.5553	-129.404	Hypo		NC_019471.2	42894711	42894788	77	6	0.5722	0.1103	0.4619	22.9928	Hyper
NC_019460.2	200961458	200961817	359	24	0.1265	0.6818	-0.5553	-195.682	Hypo		NC_019460.2	20269351	20269420	69	4	0.5485	0.0866	0.4619	13.5167	Hyper
NC_019466.2	74202144	74202501	357	15	0.0807	0.6357	-0.555	-101.27	Hypo		NC_019474.2	51782278	51782410	132	6	0.6639	0.2019	0.462	21.6601	Hyper
NC_019471.2	5992104	5992211	107	6	0.0854	0.6404	-0.5549	-29.0387	Hypo		NC_019468.2	50889788	50890031	243	22	0.6633	0.2011	0.4622	121.093	Hyper
NC_019470.2	6731810	6731985	175	12	0.1199	0.6748	-0.5549	-76.8069	Hypo		NC_019460.2	211807828	211807906	78	6	0.6332	0.1708	0.4624	20.1306	Hyper
NC_019469.2	24278405	24278472	67	7	0.0946	0.6493	-0.5548	-31.5148	Hypo		NC_019468.2	33433763	33433884	121	13	0.659	0.1964	0.4626	58.2622	Hyper
NC_019460.2	215134345	215134505	160	7	0.1438	0.6985	-0.5547	-31.1893	Hypo		NC_019462.2	40932882	40932963	81	6	0.5918	0.1289	0.4629	19.9353	Hyper
NC_019475.2	67648373	67648500	127	13	0.1572	0.7116	-0.5543	-71.4875	Hypo		NC_019462.2	12143515	12143594	79	5	0.5918	0.1289	0.4629	17.2072	Hyper
NC_019471.2	50637631	50637728	97	7	0.126	0.68	-0.554	-32.1313	Hypo		NC_019478.2	47909168	47909362	194	18	0.6373	0.1745	0.4629	92.7391	Hyper
NC_019460.2	16682957	16683043	86	11	0.0903	0.6443	-0.554	-66.6884	Hypo		NC_019475.2	67794642	67794735	93	6	0.5756	0.1127	0.4629	22.8365	Hyper
NC_019469.2	50651441	50651514	73	5	0.0815	0.6352	-0.5538	-23.8094	Hypo		NC_019471.2	53132235	53132325	90	10	0.7393	0.2763	0.463	36.6963	Hyper
NC_019472.2	40733161	40733228	67	6	0.0756	0.629	-0.5534	-31.3252	Hypo		NC_019469.2	3550623	3550676	53	4	0.6785	0.2155	0.463	14.2008	Hyper
NC_019465.2	83193878	83194048	170	17	0.0992	0.6524	-0.5532	-118.607	Hypo		NC_019462.2	50040529	50040620	91	7	0.6037	0.1405	0.4632	23.8786	Hyper
NC_019460.2	179579815	179579904	89	5	0.1191	0.6716	-0.5525	-18.3293	Hypo		NC_019481.2	37251438	37251509	71	7	0.5728	0.1095	0.4633	29.0848	Hyper
NC_019476.2	58170955	58171115	160	24	0.1354	0.6876	-0.5523	-194.749	Hypo		NC_019460.2	18554372	18554597	225	13	0.5676	0.1041	0.4635	65.699	Hyper
NC_019480.2	60066461	60066718	257	16	0.0797	0.632	-0.5522	-116.912	Hypo		NC_019478.2	46871395	46871488	93	6	0.5981	0.1344	0.4637	19.3543	Hyper
NC_019480.2	56678200	56678261	61	4	0.0983	0.6506	-0.5522	-16.3447	Hypo		NC_019480.2	61345113	61345209	96	7	0.6289	0.1651	0.4637	24.2115	Hyper
NC_019460.2	2594386	2594486	100	4	0.1032	0.655	-0.5519	-16.9329	Hypo		NC_019471.2	11031430	11031519	89	5	0.6101	0.1456	0.4645	19.1821	Hyper
NC_019466.2	13825624	13827218	1594	294	0.1255	0.6768	-0.5513	-4065.89	Hypo		NC_019465.2	87748662	87748743	81	9	0.6217	0.1572	0.4646	32.8813	Hyper
NC_019471.2	43299236	43299327	91	5	0.1192	0.6704	-0.5512	-21.3698	Hypo		NC_019479.2	50145134	50145198	64	7	0.6639	0.1989	0.465	26.9059	Hyper
NC_019478.2	41548071	41548170	99	9	0.1306	0.6816	-0.551	-41.4411	Hypo		NC_019472.2	50478959	50479043	84	7	0.6215	0.1566	0.465	23.5204	Hyper
NC_019470.2	25689426	25689573	147	5	0.1178	0.6684	-0.5506	-18.2807	Hypo		NC_019478.2	44659353	44659444	91	11	0.6378	0.1727	0.4651	44.8022	Hyper
NC_019466.2	15407033	15407127	94	6	0.1148	0.6652	-0.5504	-28.6672	Hypo		NC_019479.2	464624	464724	100	7	0.5668	0.1015	0.4653	26.3816	Hyper
NC_019469.2	49818856	49821037	2181	15	0.1424	0.6923	-0.5499	-69.7319	Hypo		NC_019465.2	90439495	90439672	177	16	0.6161	0.1507	0.4654	77.344	Hyper
NC_019472.2	31233439	31233526	87	10	0.1537	0.7031	-0.5494	-49.2032	Hypo		NC_019460.2	214196416	214196482	66	8	0.6177	0.1523	0.4655	28.1287	Hyper
NC_019471.2	12627374	12627515	141	10	0.1192	0.6685	-0.5493	-48.6421	Hypo		NC_019474.2	68916645	68916722	77	5	0.6078	0.1422	0.4656	15.8919	Hyper
NC_019475.2	24947343	24947418	75	5	0.0879	0.6372	-0.5493	-25.5197	Hypo		NC_019461.2	117218269	117218377	108	7	0.576	0.1103	0.4657	26.5917	Hyper
NC_019460.2	104473284	104473365	81	9	0.1641	0.7134	-0.5493	-43.3517	Hypo		NC_019475.2	68446885	68446941	56	7	0.6393	0.1733	0.4659	23.3045	Hyper
NC_019467.2	85505777	85505871	94	6	0.0894	0.6384	-0.5491	-28.2101	Hypo		NC_019476.2	51238365	51238559	194	14	0.6032	0.1373	0.466	74.3999	Hyper
NC_019470.2	11513235	11513347	112	7	0.1054	0.6538	-0.5483	-33.4097	Hypo		NC_019460.2	221889354	221889519	165	7	0.7419	0.2757	0.4662	25.0983	Hyper
NC_019477.2	19598727	19598822	95	7	0.1593	0.7072	-0.5479	-27.2718	Hypo		NC_019481.2	1229864	1230042	178	20	0.6091	0.1423	0.4667	118.629	Hyper
NC_019467.2	73445534	73445610	76	4	0.0856	0.6332	-0.5476	-17.1647	Hypo		NC_019469.2	49222862	49223008	146	15	0.6488	0.1816	0.4672	70.235	Hyper
NC_019460.2	161955913	161956086	173	22	0.193	0.7405	-0.5475	-158.814	Hypo		NC_019460.2	6321079	6321210	131	7	0.5766	0.1094	0.4672	26.4628	Hyper
NC_019474.2	5920621	5920759	138	9	0.1704	0.7177	-0.5473	-45.8793	Hypo		NC_019467.2	34854840	34854913	73	8	0.6426	0.1749	0.4677	31.3179	Hyper
NC_019462.2	1208516	1208641	125	9	0.1834	0.7307	-0.5473	-47.7917	Hypo		NC_019476.2	6139641	6139742	101	6	0.6498	0.1812	0.4686	19.2775	Hyper
NC_019473.2	69580570	69580899	329	13	0.0568	0.6038	-0.547	-93.7975	Hypo		NC_019462.2	14547512	14547606	94	8	0.5608	0.0919	0.4689	31.8726	Hyper
NC_019467.2	11664656	11664977	321	19	0.1338	0.6808	-0.547	-139.197	Hypo		NC_019481.2	34086475	34086708	233	7	0.7603	0.2914	0.4689	27.0636	Hyper
NC_019468.2	50680573	50680695	122	9	0.1374	0.6841	-0.5467	-42.5949	Hypo		NC_019460.2	222316764	222316815	51	8	0.6427	0.1737	0.4689	40.197	Hyper
NC_019477.2	35051609	35051669	60	5	0.1351	0.6817	-0.5466	-21.3095	Hypo		NC_019459.2	247365649	247365860	211	15	0.5719	0.1028	0.4691	81.8012	Hyper
NC_019478.2	42097027	42097113	86	4	0.0838	0.6303	-0.5465	-16.7917	Hypo		NC_019468.2	60540168	60540294	126	14	0.5709	0.1017	0.4692	71.5469	Hyper
NC_019466.2	55076694	55076763	69	11	0.1093	0.6558	-0.5465	-53.8551	Hypo		NC_019471.2	50445520	50445687	167	15	0.6299	0.1606	0.4693	82.8908	Hyper
NC_019464.2	44869938	44870052	114	8	0.0762	0.6226	-0.5463	-42.4592	Hypo		NC_019460.2	213161122	213161200	78	6	0.5929	0.1235	0.4694	20.5434	Hyper
NC_019462.2	63332680	63332779	99	7	0.143	0.6891	-0.5462	-32.7466	Hypo		NC_019461.2	93835647	93835742	95	6	0.8067	0.3372	0.4695	20.9737	Hyper
NC_019461.2	105665657	105670085	4428	11	0.1769	0.7225	-0.5455	-49.5644	Hypo		NC_019460.2	8805015	8805154	139	8	0.5754	0.1056	0.4698	36.6726	Hyper
NC_019470.2	41845321	41845391	70	7	0.1503	0.6957	-0.5454	-31.1443	Hypo		NC_019481.2	32174411	32174561	150	11	0.54	0.0697	0.4704	59.786	Hyper
NC_019465.2	80512579	80513097	518	14	0.1195	0.6646	-0.5451	-64.3061	Hypo		NC_019474.2	51020817	51021016	199	9	0.6629	0.1922	0.4707	40.7903	Hyper
NC_019480.2	24792561	24792654	93	6	0.1266	0.6709	-0.5443	-25.3598	Hypo		NC_019470.2	69849964	69850091	127	6	0.5916	0.1209	0.4707	24.2934	Hyper
NC_019460.2	138388979	138389136	157	4	0.1032	0.6473	-0.5442	-16.5435	Hypo		NC_019474.2	59660165	59660240	75	10	0.6069	0.1357	0.4711	47.343	Hyper
NC_019475.2	66345794	66345880	86	7	0.1125	0.6565	-0.544	-32.7013	Hypo		NC_019481.2	40702385	40702533	148	12	0.5749	0.1038	0.4711	61.2115	Hyper
NC_019471.2	23031849	23031946	97	10	0.1002	0.6437	-0.5436	-57.1615	Hypo		NC_019478.2	42320801	42321049	248	14	0.7051	0.2336	0.4715	67.9542	Hyper
NC_019482.2	4727685	4727811	126	14	0.1744	0.718	-0.5436	-82.9982	Hypo		NC_019480.2	58655340	58655423	83	10	0.6932	0.2214	0.4718	38.5101	Hyper
NC_019472.2	40024496	40024593	97	8	0.1581	0.7017	-0.5435	-34.8183	Hypo		NC_019471.2	41279129	41279196	67	7	0.712	0.2401	0.4719	27.4528	Hyper
NC_019484.2	6237485	6237562	77	6	0.0926	0.636	-0.5434	-28.8347	Hypo		NC_019461.2	65433602	65433660	58	4	0.6026	0.1306	0.472	12.8242	Hyper
NC_019460.2	40475575	40475728	153	4	0.092	0.6353	-0.5433	-16.3047	Hypo		NC_019475.2	32076044	32076143	99	17	0.6599	0.1879	0.472	91.0299	Hyper
NC_019460.2	134098172	134098315	143	6	0.1108	0.6535	-0.5428	-26.1695	Hypo		NC_019471.2	13886886	13886983	97	5	0.6132	0.1402	0.4729	16.2953	Hyper
NC_019480.2	60261788	60262087	299	18	0.1123	0.6548	-0.5425	-132.823	Hypo		NC_019460.2	223811778	223811868	90	13	0.7582	0.2853	0.473	54.9374	Hyper
NC_019459.2	24444769	24444899	130	6	0.1554	0.6978	-0.5424	-26.8778	Hypo		NC_019478.2	31038011	31038172	161	7	0.5516	0.0779	0.4737	32.2074	Hyper
NC_019467.2	74592811	74592938	127	10	0.1481	0.6903	-0.5422	-47.3803	Hypo		NC_019481.2	438766	438866	100	8	0.6357	0.1615	0.4742	29.3558	Hyper
NC_019467.2	75914547	75914646	99	10	0.1481	0.6903	-0.5422	-47.3739	Hypo		NC_019475.2	64294384	64294525	141	6	0.5993	0.125	0.4743	22.6664	Hyper
NC_019469.2	5598224	5598360	136	12	0.1333	0.6754	-0.5421	-74.0812	Hypo		NC_019481.2	11223414	11223528	114	7	0.5952	0.1207	0.4745	26.7226	Hyper
NC_019476.2	53570062	53570149	87	7	0.1194	0.6606	-0.5412	-32.9741	Hypo		NC_019471.2	32947149	32947231	82	6	0.6203	0.1456	0.4747	20.3921	Hyper
NC_019474.2	68896718	68896790	72	8	0.1746	0.7149	-0.5404	-36.8616	Hypo		NC_019468.2	18726579	18726682	103	7	0.6362	0.1611	0.4751	24.44	Hyper
NC_019481.2	416029	416178	149	14	0.1909	0.7313	-0.5404	-79.1386	Hypo		NC_019476.2	58087350	58087465	115	8	0.5989	0.1238	0.4751	30.7768	Hyper
NC_019459.2	2054983	2055129	146	13	0.198	0.7381	-0.5402	-65.3935	Hypo		NC_019463.2	115320125	115320255	130	7	0.6829	0.2077	0.4752	21.1726	Hyper
NC_019460.2	223579755	223579873	118	8	0.0816	0.6217	-0.54	-41.287	Hypo		NC_019467.2	31242470	31242526	56	7	0.6242	0.149	0.4752	25.1496	Hyper
NC_019471.2	53013377	53013567	190	17	0.148	0.6879	-0.5399	-101.694	Hypo		NC_019460.2	81017384	81017481	97	6	0.6247	0.1494	0.4753	20.0255	Hyper
NC_019470.2	42004020	42004151	131	6	0.1439	0.6837	-0.5398	-25.4186	Hypo		NC_019461.2	118148988	118149148	160	12	0.6193	0.1438	0.4754	59.0726	Hyper
NC_019465.2	16331362	16331907	545	44	0.0764	0.6161	-0.5398	-388.548	Hypo		NC_019479.2	44357634	44357808	174	7	0.6251	0.1493	0.4758	25.0627	Hyper
NC_019467.2	13612455	13612525	70	6	0.1234	0.663	-0.5395	-25.0871	Hypo		NC_019470.2	65444056	65444279	223	5	0.5788	0.103	0.4758	22.4856	Hyper
NC_019467.2	84820683	84820818	135	6	0.1234	0.663	-0.5395	-25.0827	Hypo		NC_019476.2	10477855	10477938	83	5	0.6032	0.1271	0.4761	16.8952	Hyper
NC_019467.2	78374525	78374623	98	6	0.1234	0.663	-0.5395	-25.0667	Hypo		NC_019465.2	31757365	31757458	93	8	0.6457	0.1691	0.4766	29.1667	Hyper
NC_019477.2	48330183	48330243	60	7	0.1185	0.6576	-0.539	-28.249	Hypo		NC_019478.2	23633176	23633354	178	15	0.6305	0.1539	0.4766	71.4524	Hyper
NC_019471.2	49952586	49952717	131	17	0.2121	0.7508	-0.5387	-98.7837	Hypo		NC_019472.2	34219326	34219391	65	5	0.7714	0.2946	0.4768	16.1924	Hyper
NC_019459.2	248407727	248407790	63	5	0.1459	0.6845	-0.5386	-17.0461	Hypo		NC_019472.2	24734749	24734836	87	6	0.6086	0.1312	0.4774	23.465	Hyper
NC_019473.2	3671356	3671421	65	8	0.1118	0.6502	-0.5385	-42.2655	Hypo		NC_019461.2	116254109	116254199	90	7	0.5885	0.1106	0.4779	27.9826	Hyper
NC_019460.2	223967390	223967476	86	9	0.1854	0.7235	-0.5381	-41.8941	Hypo		NC_019465.2	495679	495760	81	4	0.5485	0.0702	0.4783	15.5199	Hyper
NC_019459.2	104058793	104058858	65	6	0.1588	0.6969	-0.5381	-21.2424	Hypo		NC_019460.2	206045929	206046135	206	22	0.6074	0.1291	0.4783	146.283	Hyper
NC_019459.2	184952463	184952563	100	6	0.1588	0.6969	-0.5381	-21.2424	Hypo		NC_019464.2	97709791	97709858	67	10	0.6566	0.1782	0.4784	39.0331	Hyper
NC_019474.2	39850421	39850693	272	22	0.1315	0.6695	-0.538	-168.52	Hypo		NC_019477.2	48114136	48114288	152	10	0.633	0.1545	0.4785	39.899	Hyper
NC_019460.2	99873137	99873254	117	6	0.0816	0.6195	-0.5379	-30.1285	Hypo		NC_019477.2	46262778	46262872	94	8	0.6658	0.187	0.4788	32.0081	Hyper
NC_019464.2	99249904	99249982	78	9	0.1459	0.6836	-0.5377	-40.329	Hypo		NC_019468.2	53520229	53520324	95	7	0.5693	0.0905	0.4788	28.8887	Hyper
NC_019479.2	46813032	46813094	62	4	0.1007	0.6384	-0.5377	-17.058	Hypo		NC_019471.2	11061668	11061809	141	10	0.5941	0.1148	0.4793	42.4473	Hyper
NC_019480.2	6628840	6628939	99	6	0.1474	0.6851	-0.5377	-27.3679	Hypo		NC_019476.2	51668126	51668196	70	6	0.6448	0.1652	0.4796	23.3865	Hyper
NC_019473.2	70363943	70364308	365	26	0.1458	0.6832	-0.5374	-192.536	Hypo		NC_019481.2	10166073	10166238	165	7	0.5952	0.1152	0.4799	27.0616	Hyper
NC_019459.2	324150	324277	127	12	0.1384	0.6756	-0.5372	-60.3859	Hypo		NC_019475.2	68056922	68057080	158	9	0.6531	0.1732	0.4799	34.0336	Hyper
NC_019481.2	38655364	38655450	86	8	0.1292	0.6659	-0.5367	-38.7456	Hypo		NC_019477.2	47505931	47505987	56	4	0.624	0.1431	0.4809	13.826	Hyper
NC_019459.2	125598972	125599023	51	5	0.1255	0.6621	-0.5366	-20.1723	Hypo		NC_019479.2	50698260	50698388	128	6	0.584	0.1029	0.4811	22.3212	Hyper
NC_019480.2	61943951	61944101	150	13	0.1317	0.668	-0.5364	-71.9344	Hypo		NC_019476.2	54992104	54992220	116	6	0.624	0.1429	0.4811	20.993	Hyper
NC_019470.2	38238468	38238544	76	4	0.2604	0.7966	-0.5362	-15.6293	Hypo		NC_019476.2	6133059	6133148	89	5	0.6732	0.1921	0.4812	17.9573	Hyper
NC_019467.2	85917192	85917277	85	6	0.0714	0.6076	-0.5362	-28.1629	Hypo		NC_019482.2	25689499	25689599	100	5	0.57	0.0886	0.4814	19.5496	Hyper
NC_019482.2	44125075	44129978	4903	14	0.1003	0.6363	-0.536	-65.759	Hypo		NC_019478.2	48220568	48220676	108	10	0.616	0.1346	0.4814	43.6731	Hyper
NC_019482.2	42438957	42439300	343	12	0.156	0.6913	-0.5353	-58.2438	Hypo		NC_019477.2	3633232	3633306	74	13	0.6301	0.1482	0.4819	58.5714	Hyper
NC_019480.2	39647398	39647526	128	5	0.1136	0.6486	-0.535	-19.9294	Hypo		NC_019460.2	103969887	103970012	125	9	0.5992	0.1173	0.4819	41.3628	Hyper
NC_019474.2	64003580	64003664	84	8	0.1805	0.7154	-0.5349	-35.812	Hypo		NC_019473.2	57380251	57380519	268	10	0.7219	0.2399	0.482	47.029	Hyper
NC_019472.2	56223912	56223968	56	5	0.0756	0.6105	-0.5349	-21.9591	Hypo		NC_019475.2	60703497	60703550	53	6	0.5756	0.0928	0.4828	24.8431	Hyper
NC_019480.2	43819056	43819139	83	9	0.096	0.6303	-0.5343	-44.9283	Hypo		NC_019468.2	54067172	54067264	92	8	0.6548	0.1717	0.4832	29.4593	Hyper
NC_019462.2	103733711	103734058	347	32	0.1025	0.6368	-0.5342	-283.477	Hypo		NC_019476.2	39185393	39185543	150	8	0.5989	0.1154	0.4835	33.6401	Hyper
NC_019474.2	64980982	64981125	143	27	0.0916	0.6257	-0.5341	-251.308	Hypo		NC_019481.2	41885277	41885368	91	7	0.6181	0.1344	0.4837	29.8609	Hyper
NC_019467.2	83346271	83346325	54	7	0.1131	0.6473	-0.5341	-29.6436	Hypo		NC_019474.2	66866138	66866239	101	9	0.5821	0.098	0.4841	45.5077	Hyper
NC_019465.2	81512508	81512611	103	14	0.1617	0.6956	-0.534	-76.3394	Hypo		NC_019479.2	18605792	18605947	155	11	0.6158	0.1317	0.4841	56.8496	Hyper
NC_019466.2	29649617	29649705	88	5	0.1034	0.6373	-0.5339	-20.7268	Hypo		NC_019478.2	43178576	43178717	141	9	0.7282	0.2442	0.4841	33.947	Hyper
NC_019464.2	84387192	84387332	140	11	0.1271	0.6608	-0.5338	-53.9238	Hypo		NC_019483.2	35133130	35133193	63	6	0.6463	0.162	0.4843	22.555	Hyper
NC_019468.2	22667882	22667941	59	8	0.1522	0.686	-0.5338	-34.9417	Hypo		NC_019466.2	17118800	17119101	301	12	0.5967	0.1123	0.4844	64.0849	Hyper
NC_019468.2	53177017	53177147	130	6	0.0907	0.6239	-0.5331	-27.7366	Hypo		NC_019469.2	50728009	50728124	115	8	0.7712	0.2867	0.4845	30.6162	Hyper
NC_019479.2	49261121	49261212	91	6	0.1189	0.6518	-0.5329	-25.6263	Hypo		NC_019458.2	19022822	19022923	101	8	0.6492	0.1646	0.4846	28.2608	Hyper
NC_019460.2	599886	599974	88	12	0.1861	0.7188	-0.5327	-58.4481	Hypo		NC_019459.2	242935565	242935628	63	7	0.6522	0.1675	0.4847	24.0169	Hyper
NC_019467.2	32948315	32948400	85	5	0.0919	0.6244	-0.5325	-20.8044	Hypo		NC_019460.2	7754219	7754302	83	9	0.6468	0.1617	0.485	34.7159	Hyper
NC_019472.2	50240474	50240643	169	6	0.0999	0.6322	-0.5323	-26.1611	Hypo		NC_019471.2	4643708	4643831	123	15	0.6018	0.1167	0.4851	78.2302	Hyper
NC_019461.2	118108932	118109090	158	14	0.1384	0.6704	-0.5321	-78.5798	Hypo		NC_019472.2	29209242	29209503	261	14	0.6334	0.1482	0.4852	70.1182	Hyper
NC_019476.2	5162245	5162358	113	13	0.116	0.6481	-0.5321	-82.0173	Hypo		NC_019466.2	25450851	25450909	58	5	0.5838	0.0983	0.4855	18.5997	Hyper
NC_019476.2	58609676	58609989	313	15	0.1416	0.6735	-0.532	-89.1494	Hypo		NC_019468.2	55414219	55414293	74	10	0.6618	0.1762	0.4856	39.77	Hyper
NC_019473.2	1791304	1791463	159	11	0.1272	0.6591	-0.5319	-55.9445	Hypo		NC_019468.2	50099042	50099156	114	6	0.6436	0.1578	0.4858	20.6698	Hyper
NC_019467.2	30920371	30920456	85	6	0.076	0.6076	-0.5316	-27.6035	Hypo		NC_019468.2	52718533	52718765	232	10	0.6912	0.2052	0.4859	48.6703	Hyper
NC_019474.2	70695249	70695467	218	17	0.169	0.6995	-0.5306	-113.953	Hypo		NC_019477.2	50817954	50818019	65	11	0.669	0.1831	0.486	43.971	Hyper
NC_019483.2	36702963	36703156	193	31	0.13	0.6606	-0.5306	-263.911	Hypo		NC_019470.2	50740709	50740827	118	8	0.7231	0.2371	0.486	33.3935	Hyper
NC_019459.2	175630376	175630463	87	5	0.1459	0.6759	-0.53	-19.8991	Hypo		NC_019471.2	59395497	59395581	84	8	0.663	0.1768	0.4862	29.4943	Hyper
NC_019466.2	12804163	12804286	123	7	0.1329	0.6625	-0.5295	-28.5406	Hypo		NC_019478.2	44465949	44466130	181	6	0.6017	0.1155	0.4862	22.6321	Hyper
NC_019477.2	3616015	3616108	93	8	0.1775	0.7069	-0.5293	-34.7186	Hypo		NC_019476.2	51219005	51219081	76	6	0.7829	0.296	0.4869	20.7245	Hyper
NC_019461.2	105463230	105463289	59	4	0.0756	0.6046	-0.529	-18.7579	Hypo		NC_019472.2	40064846	40069173	4327	9	0.6443	0.157	0.4873	29.5235	Hyper
NC_019465.2	87614122	87614218	96	7	0.1222	0.6507	-0.5285	-28.8263	Hypo		NC_019467.2	85242000	85242132	132	11	0.6759	0.1883	0.4876	46.3151	Hyper
NC_019460.2	214095210	214095509	299	14	0.1992	0.7277	-0.5285	-76.0168	Hypo		NC_019483.2	33943781	33943882	101	5	0.6406	0.1528	0.4878	18.7113	Hyper
NC_019468.2	39867482	39867635	153	14	0.1	0.6283	-0.5284	-80.8238	Hypo		NC_019470.2	69315811	69315881	70	13	0.6466	0.1586	0.4879	62.0523	Hyper
NC_019459.2	69906758	69906853	95	11	0.1126	0.641	-0.5284	-54.3398	Hypo		NC_019461.2	23023450	23023647	197	5	0.7753	0.2873	0.488	20.2904	Hyper
NC_019478.2	28067376	28067515	139	8	0.108	0.6361	-0.5281	-38.9692	Hypo		NC_019467.2	85661225	85661328	103	11	0.6463	0.1581	0.4882	47.8234	Hyper
NC_019470.2	79253135	79253274	139	9	0.1834	0.7114	-0.528	-39.4812	Hypo		NC_019481.2	35107995	35108093	98	7	0.6495	0.1612	0.4883	25.8903	Hyper
NC_019462.2	105385908	105386000	92	8	0.166	0.6939	-0.5279	-33.919	Hypo		NC_019467.2	3841664	3841764	100	9	0.6736	0.1852	0.4884	35.4681	Hyper
NC_019478.2	39674804	39675023	219	16	0.096	0.6238	-0.5278	-110.716	Hypo		NC_019475.2	14047798	14047894	96	5	0.7419	0.2531	0.4888	16.894	Hyper
NC_019483.2	33873623	33873724	101	10	0.0928	0.6198	-0.5271	-52.4565	Hypo		NC_019480.2	19742327	19742415	88	8	0.6435	0.1546	0.4889	39.454	Hyper
NC_019476.2	57911109	57911278	169	10	0.1839	0.7108	-0.5269	-46.4256	Hypo		NC_019481.2	40133484	40133584	100	5	0.6327	0.1437	0.489	18.2014	Hyper
NC_019460.2	161982948	161983069	121	13	0.1856	0.7125	-0.5268	-64.5542	Hypo		NC_019460.2	3188107	3188363	256	8	0.5948	0.1059	0.489	37.5817	Hyper
NC_019460.2	92687958	92688057	99	8	0.155	0.6816	-0.5267	-33.4944	Hypo		NC_019474.2	50082010	50082067	57	8	0.7607	0.2709	0.4898	31.1643	Hyper
NC_019473.2	71584617	71584719	102	10	0.1474	0.6738	-0.5264	-46.651	Hypo		NC_019465.2	81091425	81091498	73	6	0.6169	0.1271	0.4899	23.3382	Hyper
NC_019471.2	24908213	24913085	4872	9	0.1252	0.6506	-0.5254	-34.4693	Hypo		NC_019479.2	50742244	50742469	225	6	0.6	0.1097	0.4903	27.3963	Hyper
NC_019480.2	47937661	47937771	110	5	0.1075	0.6325	-0.525	-19.4459	Hypo		NC_019460.2	2881136	2881482	346	10	0.604	0.1136	0.4904	45.1602	Hyper
NC_019480.2	61616659	61616759	100	6	0.1839	0.7088	-0.5249	-22.9363	Hypo		NC_019470.2	75721099	75721171	72	5	0.6102	0.1197	0.4905	17.687	Hyper
NC_019475.2	68432016	68432099	83	7	0.1198	0.6444	-0.5246	-29.718	Hypo		NC_019469.2	62349061	62349113	52	9	0.6473	0.1567	0.4906	36.0037	Hyper
NC_019481.2	35263665	35263757	92	7	0.1791	0.703	-0.5239	-32.7109	Hypo		NC_019478.2	42941151	42941242	91	4	0.5534	0.0627	0.4907	15.3043	Hyper
NC_019466.2	39220235	39220303	68	4	0.09	0.6139	-0.5239	-14.8864	Hypo		NC_019460.2	135251639	135251693	54	8	0.6499	0.1592	0.4907	30.2987	Hyper
NC_019477.2	42135911	42136015	104	8	0.1548	0.6784	-0.5235	-34.2838	Hypo		NC_019478.2	41082151	41082286	135	10	0.6078	0.1167	0.4911	49.8734	Hyper
NC_019470.2	55517737	55517916	179	5	0.2135	0.7369	-0.5234	-19.1048	Hypo		NC_019468.2	44259464	44259526	62	5	0.6343	0.1433	0.4911	17.1977	Hyper
NC_019468.2	21004535	21004646	111	8	0.0975	0.6207	-0.5233	-37.6795	Hypo		NC_019460.2	8335756	8335857	101	10	0.6683	0.177	0.4913	40.3279	Hyper
NC_019474.2	4537258	4538009	751	15	0.1743	0.6974	-0.5231	-78.6323	Hypo		NC_019484.2	5371067	5371182	115	5	0.6163	0.1249	0.4915	18.795	Hyper
NC_019462.2	15386566	15386665	99	4	0.102	0.6247	-0.5227	-15.9389	Hypo		NC_019478.2	49441587	49441698	111	12	0.7109	0.2188	0.4921	51.6323	Hyper
NC_019473.2	70665175	70665242	67	9	0.0661	0.5888	-0.5227	-49.6248	Hypo		NC_019478.2	45311459	45311537	78	7	0.61	0.1178	0.4921	29.5802	Hyper
NC_019461.2	118832666	118832767	101	8	0.1569	0.6795	-0.5226	-33.6415	Hypo		NC_019470.2	71698189	71698365	176	5	0.6399	0.1475	0.4924	20.9898	Hyper
NC_019460.2	1486457	1486575	118	7	0.1575	0.6799	-0.5224	-28.5828	Hypo		NC_019481.2	38635567	38635718	151	13	0.5978	0.1052	0.4927	73.0095	Hyper
NC_019472.2	29820452	29821177	725	11	0.1524	0.6746	-0.5222	-51.4617	Hypo		NC_019470.2	82319958	82320131	173	11	0.6737	0.1805	0.4932	48.8826	Hyper
NC_019459.2	241677194	241677251	57	8	0.143	0.6652	-0.5222	-37.4667	Hypo		NC_019478.2	31515991	31516109	118	11	0.6447	0.1513	0.4934	49.4909	Hyper
NC_019471.2	59063296	59063465	169	12	0.113	0.6351	-0.522	-67.2794	Hypo		NC_019476.2	54284792	54284849	57	8	0.659	0.1656	0.4934	37.4312	Hyper
NC_019468.2	14618854	14618931	77	8	0.1585	0.6805	-0.522	-33.2373	Hypo		NC_019479.2	44045509	44045710	201	11	0.5934	0.0998	0.4936	57.9211	Hyper
NC_019474.2	62010265	62010349	84	5	0.234	0.7558	-0.5218	-20.4691	Hypo		NC_019484.2	92308780	92308860	80	6	0.5985	0.1047	0.4938	25.2735	Hyper
NC_019469.2	77236840	77236998	158	11	0.1481	0.6699	-0.5218	-51.3648	Hypo		NC_019468.2	60280000	60280137	137	13	0.6332	0.1391	0.4941	64.8823	Hyper
NC_019473.2	4889439	4889521	82	6	0.1044	0.6261	-0.5217	-24.0655	Hypo		NC_019474.2	7388193	7388285	92	6	0.6077	0.1134	0.4943	23.8325	Hyper
NC_019460.2	3800752	3800841	89	7	0.1583	0.6799	-0.5216	-28.625	Hypo		NC_019468.2	49824554	49824621	67	9	0.6754	0.181	0.4944	35.6509	Hyper
NC_019473.2	66574819	66575013	194	9	0.1115	0.633	-0.5215	-40.1488	Hypo		NC_019460.2	5793903	5793977	74	6	0.5929	0.0983	0.4947	22.7364	Hyper
NC_019468.2	59914891	59915082	191	11	0.1034	0.6247	-0.5213	-56.3258	Hypo		NC_019466.2	94282524	94282622	98	9	0.6494	0.1536	0.4957	37.884	Hyper
NC_019462.2	12614020	12614124	104	12	0.166	0.6871	-0.5212	-60.503	Hypo		NC_019461.2	118169410	118169646	236	23	0.681	0.1852	0.4958	150.519	Hyper
NC_019473.2	69081056	69081125	69	7	0.1137	0.6348	-0.5211	-32.3359	Hypo		NC_019460.2	221110091	221110185	94	8	0.6611	0.1652	0.4958	30.7897	Hyper
NC_019475.2	28066234	28066388	154	14	0.1554	0.6764	-0.521	-76.1592	Hypo		NC_019462.2	35771259	35771357	98	9	0.6555	0.1595	0.496	35.6432	Hyper
NC_019464.2	44420088	44420187	99	9	0.1649	0.6858	-0.5209	-37.9468	Hypo		NC_019461.2	112830673	112830734	61	6	0.6801	0.1834	0.4966	23.8765	Hyper
NC_019467.2	86212008	86212109	101	4	0.2383	0.7591	-0.5208	-15.1402	Hypo		NC_019479.2	42969845	42969930	85	5	0.6033	0.1066	0.4967	18.7296	Hyper
NC_019474.2	40506616	40506910	294	25	0.0924	0.613	-0.5206	-222.507	Hypo		NC_019462.2	47973528	47973659	131	11	0.6056	0.1089	0.4967	54.269	Hyper
NC_019468.2	22363196	22363293	97	10	0.1627	0.6822	-0.5196	-46.2051	Hypo		NC_019474.2	60026110	60026165	55	8	0.6343	0.1373	0.497	32.2527	Hyper
NC_019475.2	56109755	56109851	96	8	0.1864	0.706	-0.5196	-32.4277	Hypo		NC_019477.2	50425589	50425829	240	11	0.6538	0.1558	0.498	49.8623	Hyper
NC_019460.2	31167745	31167831	86	5	0.0937	0.6133	-0.5196	-20.7172	Hypo		NC_019476.2	58338943	58339052	109	13	0.7293	0.2312	0.498	60.8072	Hyper
NC_019480.2	41631020	41631155	135	6	0.0915	0.6108	-0.5193	-27.4666	Hypo		NC_019477.2	10859461	10859524	63	6	0.6357	0.1376	0.4981	19.4702	Hyper
NC_019475.2	62652803	62652976	173	5	0.1192	0.6382	-0.519	-19.5848	Hypo		NC_019468.2	26658989	26663731	4742	20	0.6635	0.1652	0.4983	89.4191	Hyper
NC_019468.2	52001107	52001182	75	7	0.1495	0.6681	-0.5185	-27.6551	Hypo		NC_019474.2	66696938	66697038	100	8	0.7989	0.3004	0.4985	38.0493	Hyper
NC_019460.2	1330322	1330436	114	9	0.0896	0.6079	-0.5183	-45.1741	Hypo		NC_019462.2	69463681	69463810	129	9	0.6457	0.1469	0.4988	36.5328	Hyper
NC_019470.2	54037850	54037939	89	11	0.1776	0.6955	-0.5179	-55.268	Hypo		NC_019458.2	5924084	5924230	146	7	0.6985	0.1988	0.4997	23.3457	Hyper
NC_019471.2	9968628	9968754	126	9	0.1403	0.6579	-0.5177	-39.28	Hypo		NC_019477.2	50472780	50472922	142	18	0.6342	0.1343	0.4999	114.471	Hyper
NC_019482.2	26460247	26460318	71	6	0.1117	0.6295	-0.5177	-24.2668	Hypo		NC_019483.2	34614051	34614107	56	4	0.7714	0.2713	0.5	13.8691	Hyper
NC_019468.2	61322034	61322158	124	15	0.1009	0.6179	-0.517	-84.5399	Hypo		NC_019459.2	234824667	234824747	80	6	0.6361	0.136	0.5001	19.7547	Hyper
NC_019462.2	48600273	48600361	88	6	0.1313	0.6482	-0.5169	-23.6667	Hypo		NC_019477.2	8259904	8260063	159	9	0.575	0.0747	0.5003	42.8335	Hyper
NC_019483.2	38376059	38378939	2880	17	0.1102	0.6272	-0.5169	-87.3668	Hypo		NC_019469.2	4413795	4413866	71	9	0.682	0.1817	0.5004	37.1938	Hyper
NC_019483.2	35416998	35417139	141	11	0.1082	0.6248	-0.5167	-55.9134	Hypo		NC_019470.2	36839807	36839981	174	12	0.6431	0.1426	0.5005	56.9119	Hyper
NC_019466.2	75487615	75487701	86	4	0.0977	0.6139	-0.5163	-14.4711	Hypo		NC_019468.2	34153204	34153276	72	4	0.6578	0.1573	0.5005	13.6675	Hyper
NC_019476.2	36617736	36617847	111	7	0.1609	0.6771	-0.5163	-28.9667	Hypo		NC_019459.2	1945598	1945744	146	15	0.6458	0.1452	0.5006	77.5814	Hyper
NC_019477.2	22900250	22900406	156	5	0.0919	0.6081	-0.5162	-21.4243	Hypo		NC_019478.2	42065091	42065260	169	8	0.6323	0.1316	0.5007	32.1378	Hyper
NC_019471.2	7649566	7649726	160	10	0.1192	0.6349	-0.5157	-47.5069	Hypo		NC_019481.2	9658651	9658822	171	10	0.6391	0.1383	0.5008	46.3891	Hyper
NC_019475.2	62313857	62313955	98	6	0.0891	0.6047	-0.5156	-26.2893	Hypo		NC_019462.2	41557690	41557798	108	8	0.6627	0.1614	0.5013	36.1456	Hyper
NC_019467.2	86163502	86163754	252	9	0.1208	0.6362	-0.5154	-43.6139	Hypo		NC_019468.2	53615991	53616091	100	7	0.6268	0.1255	0.5013	28.0547	Hyper
NC_019480.2	41520259	41524357	4098	15	0.1421	0.6572	-0.5151	-61.011	Hypo		NC_019471.2	12126302	12126512	210	14	0.6556	0.154	0.5016	82.9771	Hyper
NC_019468.2	34094038	34094188	150	14	0.1532	0.6681	-0.515	-74.0674	Hypo		NC_019472.2	26715111	26715212	101	4	0.5623	0.0607	0.5016	16.003	Hyper
NC_019460.2	209500667	209500880	213	10	0.093	0.6078	-0.5148	-55.2745	Hypo		NC_019460.2	136140874	136140961	87	9	0.6635	0.1617	0.5018	36.8183	Hyper
NC_019472.2	78902455	78902636	181	11	0.141	0.6553	-0.5143	-54.2561	Hypo		NC_019479.2	43049903	43050092	189	15	0.7246	0.2226	0.5019	97.0111	Hyper
NC_019461.2	118575943	118576067	124	9	0.1907	0.7048	-0.5141	-38.1289	Hypo		NC_019470.2	53902903	53903005	102	6	0.6491	0.1467	0.5024	22.5306	Hyper
NC_019480.2	50421984	50422093	109	9	0.1566	0.6707	-0.5141	-37.1239	Hypo		NC_019474.2	64352385	64352674	289	15	0.6445	0.1415	0.503	87.8916	Hyper
NC_019465.2	87859267	87859372	105	10	0.0561	0.5699	-0.5138	-60.2813	Hypo		NC_019476.2	59311942	59313860	1918	13	0.7545	0.2514	0.5031	49.7099	Hyper
NC_019473.2	38998776	38998837	61	7	0.0964	0.61	-0.5137	-31.9032	Hypo		NC_019474.2	63523374	63523465	91	7	0.6175	0.1142	0.5033	32.093	Hyper
NC_019467.2	15458338	15458431	93	8	0.1618	0.6755	-0.5137	-34.4665	Hypo		NC_019460.2	7268522	7268671	149	12	0.6492	0.1457	0.5035	59.6402	Hyper
NC_019467.2	14867281	14867364	83	5	0.1108	0.6244	-0.5137	-18.8229	Hypo		NC_019460.2	3714522	3714620	98	10	0.6168	0.1109	0.506	43.5238	Hyper
NC_019467.2	85892011	85892107	96	7	0.1336	0.6473	-0.5136	-27.2331	Hypo		NC_019471.2	18239709	18239806	97	5	0.6467	0.1405	0.5062	18.1224	Hyper
NC_019475.2	67685349	67685423	74	6	0.2734	0.7869	-0.5135	-22.7176	Hypo		NC_019477.2	31962455	31962573	118	20	0.6528	0.1465	0.5063	118.513	Hyper
NC_019473.2	71294232	71294366	134	12	0.1155	0.6287	-0.5132	-61.2489	Hypo		NC_019480.2	47601719	47601795	76	5	0.6243	0.1179	0.5064	19.2838	Hyper
NC_019460.2	102222519	102222573	54	6	0.1404	0.6535	-0.5132	-23.3576	Hypo		NC_019466.2	15475736	15475859	123	10	0.6365	0.1301	0.5064	46.5767	Hyper
NC_019464.2	84712792	84712887	95	5	0.0669	0.5795	-0.5126	-21.9019	Hypo		NC_019459.2	245311800	245311910	110	6	0.6525	0.1455	0.507	19.8319	Hyper
NC_019469.2	47667233	47668036	803	20	0.1118	0.6236	-0.5117	-107.075	Hypo		NC_019474.2	71676909	71676994	85	12	0.6577	0.1506	0.5071	62.3133	Hyper
NC_019481.2	38571956	38574477	2521	13	0.1411	0.6526	-0.5115	-61.3492	Hypo		NC_019464.2	89708156	89708222	66	10	0.6566	0.1492	0.5073	44.0777	Hyper
NC_019467.2	15155229	15155303	74	6	0.0962	0.6076	-0.5115	-24.1293	Hypo		NC_019464.2	97900222	97900492	270	12	0.6436	0.1357	0.5079	61.1169	Hyper
NC_019460.2	21854454	21854574	120	5	0.0883	0.5991	-0.5108	-22.1067	Hypo		NC_019468.2	50617188	50617267	79	6	0.6575	0.1493	0.5082	23.8332	Hyper
NC_019468.2	61061426	61061497	71	4	0.0975	0.6082	-0.5107	-14.9641	Hypo		NC_019471.2	13329356	13329443	87	9	0.6066	0.0982	0.5085	41.4367	Hyper
NC_019480.2	4090587	4090661	74	6	0.1063	0.6167	-0.5104	-23.9267	Hypo		NC_019474.2	69907047	69907131	84	5	0.6171	0.1076	0.5095	20.4941	Hyper
NC_019472.2	41902484	41902615	131	9	0.1355	0.6458	-0.5103	-37.8623	Hypo		NC_019482.2	40476581	40476791	210	11	0.7664	0.2569	0.5095	52.1295	Hyper
NC_019465.2	80844145	80844387	242	14	0.091	0.6012	-0.5102	-88.3262	Hypo		NC_019478.2	39540772	39544527	3755	6	0.6484	0.1387	0.5097	22.2286	Hyper
NC_019459.2	40250838	40250971	133	12	0.1555	0.6652	-0.5097	-56.4141	Hypo		NC_019462.2	16468289	16468459	170	11	0.735	0.225	0.5099	50.0426	Hyper
NC_019470.2	75748277	75748364	87	7	0.1249	0.6345	-0.5096	-28.1495	Hypo		NC_019464.2	15390924	15391034	110	6	0.6361	0.1243	0.5118	24.4116	Hyper
NC_019466.2	13438775	13438876	101	7	0.1017	0.6112	-0.5094	-28.488	Hypo		NC_019472.2	79888414	79888499	85	7	0.6548	0.1429	0.5119	28.0471	Hyper
NC_019470.2	1051634	1051739	105	9	0.1623	0.6712	-0.5088	-41.7112	Hypo		NC_019467.2	85817823	85817977	154	14	0.6677	0.1553	0.5124	71.6559	Hyper
NC_019469.2	27898141	27898202	61	4	0.0949	0.6036	-0.5087	-15.6327	Hypo		NC_019475.2	65778998	65779126	128	8	0.6334	0.1197	0.5137	34.9049	Hyper
NC_019471.2	17556398	17556613	215	25	0.1782	0.6867	-0.5085	-165.13	Hypo		NC_019471.2	60451790	60451919	129	6	0.6153	0.1015	0.5138	25.029	Hyper
NC_019472.2	60764556	60764608	52	6	0.0999	0.6084	-0.5085	-24.2095	Hypo		NC_019467.2	85616251	85616306	55	9	0.6582	0.1442	0.514	40.6616	Hyper
NC_019474.2	44318978	44319056	78	4	0.1041	0.6123	-0.5083	-12.4002	Hypo		NC_019469.2	39936404	39936458	54	7	0.7689	0.2547	0.5142	31.1045	Hyper
NC_019480.2	3052605	3052681	76	5	0.2109	0.7187	-0.5078	-17.8374	Hypo		NC_019483.2	5459828	5459962	134	10	0.7104	0.1955	0.515	44.3726	Hyper
NC_019484.2	60985323	60985384	61	6	0.1037	0.6113	-0.5076	-24.5232	Hypo		NC_019460.2	213387188	213387340	152	8	0.6177	0.1027	0.5151	35.4565	Hyper
NC_019479.2	49329410	49329572	162	11	0.071	0.5784	-0.5074	-64.3137	Hypo		NC_019472.2	47116756	47116858	102	7	0.6215	0.1053	0.5162	30.6775	Hyper
NC_019474.2	47668861	47668965	104	9	0.1347	0.642	-0.5073	-44.8496	Hypo		NC_019476.2	58669993	58670154	161	11	0.7557	0.2393	0.5164	50.0523	Hyper
NC_019462.2	16158387	16158575	188	16	0.1141	0.6214	-0.5073	-94.6269	Hypo		NC_019476.2	60176814	60176913	99	8	0.6561	0.1397	0.5164	37.698	Hyper
NC_019467.2	12341778	12341887	109	10	0.1394	0.6467	-0.5073	-43.3547	Hypo		NC_019469.2	41258237	41258328	91	4	0.7958	0.2783	0.5175	14.26	Hyper
NC_019460.2	205792837	205792931	94	5	0.1201	0.6271	-0.5071	-20.6334	Hypo		NC_019466.2	21912275	21912553	278	19	0.6472	0.1295	0.5177	135.536	Hyper
NC_019472.2	21711112	21711271	159	17	0.1707	0.6778	-0.507	-91.6689	Hypo		NC_019476.2	59780609	59783708	3099	11	0.6546	0.1367	0.5179	45.2608	Hyper
NC_019472.2	33809422	33809548	126	10	0.1255	0.6326	-0.507	-43.9485	Hypo		NC_019469.2	61913635	61913828	193	4	0.645	0.1268	0.5182	15.162	Hyper
NC_019480.2	4013436	4015417	1981	19	0.0771	0.5841	-0.5069	-107.161	Hypo		NC_019477.2	27415429	27415565	136	15	0.716	0.1978	0.5182	76.7997	Hyper
NC_019459.2	227720284	227722305	2021	44	0.1729	0.6794	-0.5065	-302.546	Hypo		NC_019477.2	27440164	27440265	101	6	0.6357	0.1169	0.5189	21.2921	Hyper
NC_019468.2	43375582	43375866	284	6	0.118	0.6243	-0.5064	-19.9959	Hypo		NC_019460.2	11613515	11613614	99	8	0.6782	0.1592	0.519	32.7729	Hyper
NC_019469.2	2735167	2735281	114	7	0.1183	0.6244	-0.5061	-29.4847	Hypo		NC_019462.2	41670005	41670076	71	4	0.6396	0.1196	0.52	13.7385	Hyper
NC_019470.2	64799458	64799609	151	8	0.235	0.7411	-0.5061	-36.0864	Hypo		NC_019476.2	48050346	48050432	86	8	0.6853	0.1652	0.5201	37.8114	Hyper
NC_019479.2	40747093	40747225	132	7	0.1292	0.6351	-0.5059	-27.7837	Hypo		NC_019475.2	55022510	55022582	72	4	0.6346	0.1135	0.5211	12.9127	Hyper
NC_019472.2	78014830	78015010	180	9	0.1183	0.6242	-0.5059	-38.6509	Hypo		NC_019479.2	50083218	50083368	150	17	0.6631	0.1416	0.5214	103.82	Hyper
NC_019474.2	67670878	67670937	59	6	0.199	0.7048	-0.5058	-25.0121	Hypo		NC_019481.2	4259054	4259152	98	7	0.6495	0.1279	0.5217	30.1014	Hyper
NC_019465.2	87571700	87571779	79	5	0.1021	0.6079	-0.5058	-18.3887	Hypo		NC_019475.2	12964210	12964335	125	5	0.617	0.0953	0.5217	20.5087	Hyper
NC_019459.2	219084957	219085120	163	7	0.1207	0.6265	-0.5058	-29.7088	Hypo		NC_019461.2	118052115	118052296	181	10	0.6836	0.1618	0.5218	49.3591	Hyper
NC_019484.2	452861	453011	150	8	0.0591	0.5647	-0.5056	-44.4783	Hypo		NC_019460.2	207341370	207341526	156	8	0.6779	0.1561	0.5218	38.1258	Hyper
NC_019466.2	588263	588325	62	5	0.0869	0.5925	-0.5056	-18.7659	Hypo		NC_019471.2	869211	869367	156	9	0.6994	0.1772	0.5222	39.5359	Hyper
NC_019460.2	1635198	1635813	615	8	0.1012	0.6066	-0.5054	-36.8193	Hypo		NC_019480.2	456206	456335	129	12	0.6679	0.1447	0.5231	58.1355	Hyper
NC_019471.2	10972883	10973025	142	9	0.1403	0.6455	-0.5052	-38.1694	Hypo		NC_019478.2	47975197	47975288	91	8	0.6549	0.1316	0.5233	34.2412	Hyper
NC_019462.2	58609336	58609415	79	11	0.1775	0.6827	-0.5052	-47.8777	Hypo		NC_019478.2	43906345	43906441	96	13	0.6972	0.1728	0.5243	66.9198	Hyper
NC_019478.2	405998	406068	70	5	0.2276	0.7328	-0.5052	-18.1708	Hypo		NC_019482.2	40961914	40961992	78	5	0.6087	0.0842	0.5245	22.3549	Hyper
NC_019468.2	26727270	26727338	68	4	0.1022	0.6073	-0.5051	-14.0357	Hypo		NC_019476.2	9670266	9670388	122	6	0.6304	0.1049	0.5255	30.1018	Hyper
NC_019471.2	53178932	53179016	84	9	0.1859	0.6909	-0.505	-36.4112	Hypo		NC_019470.2	72900183	72900278	95	6	0.6734	0.1475	0.5259	24.2823	Hyper
NC_019475.2	43076979	43077060	81	6	0.127	0.632	-0.505	-22.944	Hypo		NC_019460.2	93218840	93218956	116	13	0.7188	0.1918	0.527	69.0019	Hyper
NC_019469.2	55130437	55130564	127	17	0.129	0.6338	-0.5049	-108.981	Hypo		NC_019484.2	2332450	2332541	91	4	0.6364	0.107	0.5294	16.561	Hyper
NC_019468.2	52678741	52678828	87	8	0.1757	0.6805	-0.5048	-30.7379	Hypo		NC_019470.2	77523840	77524669	829	9	0.6422	0.1114	0.5308	37.1031	Hyper
NC_019472.2	72627331	72627423	92	6	0.0861	0.5908	-0.5047	-27.0134	Hypo		NC_019470.2	52920799	52920878	79	5	0.6512	0.1197	0.5316	20.1928	Hyper
NC_019471.2	21348796	21348895	99	4	0.0922	0.5968	-0.5046	-14.529	Hypo		NC_019459.2	246652046	246652136	90	5	0.6337	0.1017	0.5319	17.8654	Hyper
NC_019472.2	21437305	21437403	98	7	0.1489	0.6533	-0.5044	-26.3439	Hypo		NC_019472.2	75191136	75191318	182	17	0.7241	0.192	0.5321	100.176	Hyper
NC_019483.2	24752181	24752306	125	5	0.0742	0.5784	-0.5042	-20.822	Hypo		NC_019478.2	42038965	42039145	180	11	0.6273	0.0946	0.5326	60.1256	Hyper
NC_019462.2	15931497	15931660	163	10	0.1318	0.6356	-0.5038	-48.2288	Hypo		NC_019458.2	234262268	234262350	82	4	0.6353	0.1025	0.5328	12.9856	Hyper
NC_019479.2	43131560	43131699	139	10	0.1098	0.6134	-0.5037	-48.0246	Hypo		NC_019466.2	20065290	20065363	73	5	0.6996	0.1666	0.533	16.8391	Hyper
NC_019467.2	20932846	20932961	115	10	0.1022	0.6059	-0.5037	-47.2269	Hypo		NC_019474.2	67790542	67790606	64	11	0.6729	0.1398	0.5331	55.4495	Hyper
NC_019476.2	29190444	29190568	124	8	0.1507	0.6542	-0.5035	-36.2213	Hypo		NC_019478.2	42129064	42130775	1711	10	0.7516	0.2185	0.5331	43.5172	Hyper
NC_019459.2	2530696	2530760	64	4	0.1228	0.6262	-0.5033	-13.9429	Hypo		NC_019462.2	18718633	18718696	63	4	0.7182	0.1839	0.5343	15.9125	Hyper
NC_019471.2	58399597	58399731	134	10	0.0898	0.5925	-0.5027	-49.5057	Hypo		NC_019478.2	2252885	2253023	138	6	0.6636	0.129	0.5346	29.843	Hyper
NC_019476.2	57693379	57693470	91	8	0.1671	0.6697	-0.5027	-31.5553	Hypo		NC_019477.2	46363045	46363111	66	5	0.6681	0.1332	0.5348	17.0002	Hyper
NC_019460.2	57364530	57364604	74	7	0.1066	0.6089	-0.5023	-31.1154	Hypo		NC_019468.2	20913762	20913860	98	5	0.7281	0.1928	0.5354	17.4219	Hyper
NC_019472.2	49208044	49208141	97	8	0.1581	0.6602	-0.5021	-30.7767	Hypo		NC_019468.2	45357837	45357986	149	7	0.6268	0.0911	0.5357	31.6376	Hyper
NC_019484.2	54207559	54207681	122	7	0.1143	0.6163	-0.502	-28.7361	Hypo		NC_019476.2	55477275	55477391	116	11	0.688	0.1523	0.5357	54.9463	Hyper
NC_019460.2	57666177	57666277	100	5	0.1128	0.6147	-0.5019	-18.2055	Hypo		NC_019468.2	54269753	54270022	269	15	0.6905	0.1545	0.5361	90.5127	Hyper
NC_019464.2	5225943	5226091	148	10	0.0683	0.5701	-0.5018	-54.3731	Hypo		NC_019466.2	94331072	94331174	102	15	0.7358	0.1993	0.5365	84.0288	Hyper
NC_019459.2	117728171	117732932	4761	8	0.1746	0.6761	-0.5015	-27.6557	Hypo		NC_019481.2	7663540	7663591	51	6	0.646	0.109	0.537	28.0712	Hyper
NC_019464.2	4234763	4234876	113	8	0.1212	0.6226	-0.5014	-31.9134	Hypo		NC_019478.2	48617164	48617320	156	22	0.7159	0.1787	0.5372	147.492	Hyper
NC_019482.2	42845085	42845169	84	12	0.1438	0.6451	-0.5013	-64.763	Hypo		NC_019460.2	172832300	172832367	67	9	0.8059	0.268	0.538	42.2012	Hyper
NC_019481.2	18359190	18359271	81	5	0.213	0.7144	-0.5013	-20.7844	Hypo		NC_019476.2	39019010	39019274	264	23	0.6569	0.1182	0.5387	182.172	Hyper
NC_019460.2	48235937	48236015	78	5	0.264	0.7653	-0.5013	-17.6132	Hypo		NC_019470.2	77587188	77587280	92	9	0.7097	0.1709	0.5388	41.2235	Hyper
NC_019482.2	15177704	15177805	101	8	0.1355	0.6367	-0.5012	-32.3026	Hypo		NC_019479.2	49383790	49383907	117	8	0.689	0.1498	0.5392	37.5596	Hyper
NC_019482.2	33786246	33786344	98	8	0.1355	0.6367	-0.5012	-32.302	Hypo		NC_019470.2	74330362	74330459	97	7	0.7257	0.1856	0.5401	31.1703	Hyper
NC_019476.2	58487268	58487389	121	15	0.1739	0.675	-0.5011	-78.629	Hypo		NC_019467.2	85559158	85559251	93	5	0.6748	0.1344	0.5404	20.592	Hyper
NC_019479.2	41418964	41419025	61	4	0.0691	0.5698	-0.5008	-17.2454	Hypo		NC_019478.2	43660877	43660952	75	4	0.6298	0.0888	0.5409	17.3956	Hyper
NC_019466.2	13532752	13532918	166	8	0.1156	0.6161	-0.5005	-32.7175	Hypo		NC_019482.2	43277637	43277707	70	9	0.711	0.1699	0.5411	44.6754	Hyper
NC_019482.2	4563140	4563308	168	11	0.0826	0.5825	-0.5	-59.7805	Hypo		NC_019468.2	50545789	50545847	58	4	0.6273	0.0862	0.5411	16.404	Hyper
NC_019462.2	40568989	40569089	100	5	0.1561	0.6559	-0.4998	-23.5915	Hypo		NC_019478.2	43222995	43223062	67	6	0.6896	0.1483	0.5414	24.4768	Hyper
NC_019467.2	18448276	18448400	124	9	0.2044	0.704	-0.4996	-36.3604	Hypo		NC_019480.2	59216765	59216909	144	8	0.7276	0.186	0.5416	41.4628	Hyper
NC_019465.2	88267149	88267281	132	11	0.0493	0.5483	-0.4989	-65.7664	Hypo		NC_019470.2	57764529	57764612	83	7	0.7002	0.1583	0.5419	29.6803	Hyper
NC_019472.2	27758750	27758816	66	9	0.147	0.6458	-0.4988	-35.9801	Hypo		NC_019459.2	110032222	110032297	75	5	0.6337	0.0917	0.5419	18.0785	Hyper
NC_019483.2	35114005	35114135	130	8	0.1641	0.6625	-0.4984	-35.977	Hypo		NC_019469.2	49508450	49508632	182	12	0.66	0.1179	0.542	67.3466	Hyper
NC_019480.2	45463361	45463475	114	10	0.1318	0.6301	-0.4983	-54.8719	Hypo		NC_019479.2	35906201	35906276	75	8	0.6464	0.1033	0.5431	38.9628	Hyper
NC_019465.2	75644165	75644391	226	10	0.0726	0.5705	-0.4979	-51.993	Hypo		NC_019468.2	50672895	50675494	2599	12	0.6755	0.1316	0.5439	54.893	Hyper
NC_019474.2	52249203	52249416	213	8	0.14	0.6374	-0.4975	-33.6698	Hypo		NC_019471.2	10949572	10949640	68	4	0.6479	0.1032	0.5447	17.4814	Hyper
NC_019474.2	71521819	71521944	125	8	0.1525	0.6499	-0.4974	-33.0996	Hypo		NC_019464.2	76478897	76479050	153	10	0.6856	0.1402	0.5454	50.8181	Hyper
NC_019479.2	50596855	50596966	111	5	0.1151	0.6125	-0.4974	-18.406	Hypo		NC_019478.2	39164429	39164519	90	7	0.6967	0.1514	0.5454	29.8841	Hyper
NC_019480.2	48538574	48538634	60	7	0.1586	0.656	-0.4974	-25.2125	Hypo		NC_019475.2	1906333	1906472	139	9	0.7197	0.1732	0.5465	47.7626	Hyper
NC_019480.2	57536675	57536769	94	7	0.1586	0.656	-0.4974	-25.2076	Hypo		NC_019466.2	13527226	13527321	95	6	0.7183	0.171	0.5473	22.6953	Hyper
NC_019466.2	82743554	82743653	99	8	0.0812	0.5782	-0.4969	-36.8632	Hypo		NC_019460.2	1410456	1410573	117	10	0.7033	0.1529	0.5504	50.4724	Hyper
NC_019460.2	133388724	133388869	145	9	0.0998	0.5966	-0.4968	-41.2603	Hypo		NC_019479.2	21538957	21539053	96	5	0.6582	0.1066	0.5516	19.1738	Hyper
NC_019475.2	56549840	56549907	67	11	0.1479	0.644	-0.4961	-48.0077	Hypo		NC_019474.2	50635884	50635945	61	4	0.644	0.0918	0.5522	17.3087	Hyper
NC_019468.2	51648127	51648248	121	9	0.1405	0.6365	-0.496	-40.2266	Hypo		NC_019462.2	6241290	6241358	68	6	0.6618	0.1082	0.5536	27.3627	Hyper
NC_019469.2	78040118	78040194	76	8	0.19	0.6859	-0.4959	-33.0012	Hypo		NC_019470.2	33603522	33603641	119	8	0.7225	0.1688	0.5537	37.2439	Hyper
NC_019470.2	80788852	80788938	86	9	0.1623	0.6579	-0.4956	-35.5349	Hypo		NC_019474.2	64936306	64936454	148	7	0.6422	0.087	0.5552	36.271	Hyper
NC_019461.2	118220280	118220393	113	8	0.1384	0.6339	-0.4955	-32.6792	Hypo		NC_019476.2	54427054	54427163	109	7	0.728	0.172	0.556	32.5811	Hyper
NC_019478.2	7032834	7033082	248	12	0.1031	0.5986	-0.4955	-71.3546	Hypo		NC_019474.2	50940514	50940653	139	8	0.7124	0.155	0.5575	39.3883	Hyper
NC_019458.2	271476976	271477105	129	12	0.143	0.6384	-0.4954	-55.3172	Hypo		NC_019479.2	11395448	11395637	189	12	0.7154	0.1579	0.5575	125.28	Hyper
NC_019461.2	116299724	116300020	296	25	0.1878	0.6831	-0.4953	-170.948	Hypo		NC_019480.2	49714398	49714500	102	7	0.7225	0.1649	0.5577	28.9346	Hyper
NC_019473.2	67462376	67462484	108	12	0.067	0.5622	-0.4953	-67.1052	Hypo		NC_019473.2	5295601	5295674	73	6	0.6807	0.1226	0.5581	24.26	Hyper
NC_019472.2	77463316	77463450	134	7	0.0844	0.5797	-0.4953	-32.9169	Hypo		NC_019478.2	39456540	39456649	109	15	0.7215	0.1626	0.559	88.3867	Hyper
NC_019474.2	62537305	62537403	98	9	0.2007	0.6958	-0.495	-36.2036	Hypo		NC_019472.2	27556258	27556349	91	8	0.6905	0.1312	0.5593	35.5634	Hyper
NC_019468.2	28044064	28044188	124	8	0.14	0.6346	-0.4946	-34.4933	Hypo		NC_019472.2	73141371	73141468	97	6	0.6905	0.1312	0.5593	23.6959	Hyper
NC_019460.2	218646699	218646866	167	7	0.0836	0.578	-0.4945	-31.3471	Hypo		NC_019474.2	44339089	44339206	117	5	0.6811	0.1214	0.5597	22.4746	Hyper
NC_019469.2	41716007	41716149	142	15	0.1113	0.6057	-0.4944	-85.0546	Hypo		NC_019462.2	2433199	2433471	272	18	0.6879	0.1281	0.5598	122.196	Hyper
NC_019468.2	23866951	23867161	210	13	0.1211	0.6155	-0.4944	-76.3345	Hypo		NC_019461.2	117368854	117368952	98	6	0.7029	0.1429	0.56	24.0052	Hyper
NC_019459.2	248202986	248203086	100	5	0.1111	0.6054	-0.4942	-19.3079	Hypo		NC_019461.2	14971145	14971210	65	6	0.7029	0.1429	0.56	24.0052	Hyper
NC_019478.2	24880815	24880967	152	12	0.1717	0.6658	-0.4941	-61.2492	Hypo		NC_019460.2	34327349	34327447	98	8	0.6554	0.0953	0.5601	39.1824	Hyper
NC_019474.2	39665408	39665470	62	4	0.0859	0.5798	-0.4939	-16.3102	Hypo		NC_019479.2	20963248	20963388	140	7	0.6708	0.1099	0.5608	31.2673	Hyper
NC_019473.2	35983028	35983127	99	6	0.1043	0.5981	-0.4938	-22.1587	Hypo		NC_019462.2	5852817	5852915	98	10	0.6651	0.104	0.5612	51.24	Hyper
NC_019473.2	5042600	5042675	75	6	0.1044	0.5981	-0.4938	-21.8487	Hypo		NC_019468.2	9756710	9756783	73	6	0.6969	0.1358	0.5612	23.6998	Hyper
NC_019476.2	52593247	52593318	71	5	0.143	0.6368	-0.4938	-17.498	Hypo		NC_019477.2	11538041	11538121	80	6	0.7002	0.1384	0.5619	23.9034	Hyper
NC_019472.2	79659046	79659198	152	20	0.1602	0.6535	-0.4934	-115.859	Hypo		NC_019473.2	62387646	62387737	91	8	0.721	0.1583	0.5628	35.3282	Hyper
NC_019476.2	10599566	10599698	132	15	0.2298	0.7231	-0.4933	-75.1732	Hypo		NC_019467.2	75532991	75533199	208	14	0.7132	0.1504	0.5628	96.5973	Hyper
NC_019469.2	43198983	43199070	87	7	0.1232	0.6162	-0.493	-29.5416	Hypo		NC_019469.2	78783433	78783649	216	17	0.724	0.1608	0.5632	125.409	Hyper
NC_019459.2	15514006	15514154	148	7	0.1335	0.6265	-0.493	-27.139	Hypo		NC_019473.2	1009621	1009720	99	6	0.6807	0.117	0.5636	24.8484	Hyper
NC_019461.2	98631748	98631825	77	4	0.0884	0.5813	-0.4929	-16.2542	Hypo		NC_019459.2	66823763	66823862	99	10	0.7389	0.1753	0.5636	49.4137	Hyper
NC_019467.2	18800708	18800765	57	7	0.1544	0.6473	-0.4928	-24.9289	Hypo		NC_019464.2	82681214	82681294	80	4	0.7593	0.1954	0.5639	14.7908	Hyper
NC_019459.2	243096407	243096500	93	8	0.1184	0.6112	-0.4928	-36.7581	Hypo		NC_019471.2	10836166	10836267	101	9	0.6892	0.1248	0.5644	43.1022	Hyper
NC_019459.2	6588818	6588883	65	7	0.2628	0.7557	-0.4928	-22.7659	Hypo		NC_019460.2	100600502	100600601	99	9	0.6847	0.1203	0.5644	43.4968	Hyper
NC_019470.2	74565037	74565100	63	7	0.1121	0.6046	-0.4924	-30.6715	Hypo		NC_019478.2	41759552	41759638	86	4	0.7314	0.1661	0.5653	14.3688	Hyper
NC_019481.2	40867133	40867309	176	13	0.1811	0.6733	-0.4923	-64.7093	Hypo		NC_019466.2	15454026	15454103	77	7	0.7594	0.1939	0.5655	29.4759	Hyper
NC_019465.2	87468835	87469108	273	9	0.0878	0.5801	-0.4922	-39.5138	Hypo		NC_019471.2	9898492	9898595	103	5	0.784	0.2147	0.5693	22.1257	Hyper
NC_019459.2	129964278	129964375	97	7	0.1335	0.6254	-0.4919	-29.0681	Hypo		NC_019484.2	25109398	25109698	300	8	0.6226	0.0518	0.5708	58.9097	Hyper
NC_019459.2	164313489	164313563	74	7	0.1788	0.6705	-0.4917	-26.6486	Hypo		NC_019482.2	33372780	33372854	74	4	0.7062	0.1345	0.5717	14.5158	Hyper
NC_019460.2	218746424	218746535	111	11	0.1148	0.6064	-0.4916	-51.4472	Hypo		NC_019468.2	7972525	7972605	80	7	0.7199	0.1479	0.572	29.9115	Hyper
NC_019467.2	84225815	84230072	4257	23	0.1333	0.6248	-0.4915	-132.647	Hypo		NC_019481.2	41504403	41504593	190	13	0.6494	0.0771	0.5723	83.5477	Hyper
NC_019469.2	40732291	40732426	135	12	0.1869	0.6781	-0.4913	-53.5224	Hypo		NC_019461.2	65800120	65800195	75	9	0.75	0.1774	0.5726	43.2237	Hyper
NC_019468.2	57370733	57370974	241	13	0.1372	0.6284	-0.4913	-70.9654	Hypo		NC_019470.2	52437321	52437418	97	5	0.6861	0.1133	0.5728	19.9243	Hyper
NC_019460.2	200877546	200877628	82	7	0.1446	0.6359	-0.4913	-25.9413	Hypo		NC_019475.2	5673536	5673607	71	6	0.7123	0.1388	0.5734	24.5401	Hyper
NC_019469.2	1927068	1927161	93	6	0.1153	0.6063	-0.491	-22.0873	Hypo		NC_019475.2	59892887	59892983	96	4	0.7765	0.2029	0.5735	15.4781	Hyper
NC_019476.2	38519399	38519454	55	10	0.2185	0.7094	-0.4909	-40.1155	Hypo		NC_019480.2	6929237	6929307	70	5	0.7307	0.1571	0.5736	19.1274	Hyper
NC_019479.2	47671904	47671962	58	6	0.1036	0.5943	-0.4907	-23.284	Hypo		NC_019471.2	37528041	37528133	92	7	0.683	0.1092	0.5738	31.7499	Hyper
NC_019480.2	32252600	32252693	93	13	0.1625	0.6532	-0.4907	-62.8892	Hypo		NC_019477.2	50389768	50389865	97	5	0.6681	0.0937	0.5744	20.3642	Hyper
NC_019460.2	1404087	1404150	63	8	0.1608	0.6513	-0.4905	-30.5774	Hypo		NC_019462.2	42388691	42388801	110	6	0.7036	0.1289	0.5747	24.6076	Hyper
NC_019472.2	53763188	53763312	124	7	0.1418	0.6322	-0.4904	-30.5899	Hypo		NC_019462.2	42652483	42652546	63	4	0.7036	0.1289	0.5747	14.1271	Hyper
NC_019468.2	60428835	60431854	3019	13	0.1431	0.6331	-0.49	-49.0722	Hypo		NC_019470.2	9656349	9656450	101	8	0.7032	0.1284	0.5748	37.1978	Hyper
NC_019469.2	51788535	51788665	130	10	0.1362	0.6261	-0.4898	-48.5518	Hypo		NC_019476.2	58419872	58419986	114	13	0.7805	0.2058	0.5748	74.8473	Hyper
NC_019477.2	46682513	46682786	273	29	0.1682	0.6579	-0.4898	-201.175	Hypo		NC_019462.2	4932697	4932763	66	7	0.6771	0.1022	0.5749	32.0251	Hyper
NC_019469.2	46979506	46979680	174	6	0.1029	0.5925	-0.4896	-23.5891	Hypo		NC_019466.2	94344045	94344130	85	9	0.7618	0.1867	0.5751	46.3107	Hyper
NC_019482.2	34035312	34035428	116	6	0.1033	0.5925	-0.4892	-25.7662	Hypo		NC_019476.2	59633255	59633336	81	4	0.7413	0.1652	0.5761	13.853	Hyper
NC_019474.2	68779325	68779474	149	9	0.1347	0.6238	-0.4891	-43.0552	Hypo		NC_019467.2	86325819	86325991	172	12	0.7427	0.1664	0.5763	68.5148	Hyper
NC_019477.2	15185939	15186087	148	6	0.0898	0.5788	-0.489	-24.3778	Hypo		NC_019460.2	8115363	8115447	84	8	0.6827	0.1059	0.5768	50.1006	Hyper
NC_019460.2	12278858	12278935	77	5	0.2881	0.7765	-0.4885	-16.443	Hypo		NC_019481.2	40838103	40838197	94	7	0.7036	0.1267	0.5769	31.8924	Hyper
NC_019474.2	44555491	44555543	52	4	0.132	0.6204	-0.4884	-15.696	Hypo		NC_019459.2	226652712	226652807	95	5	0.6321	0.0547	0.5774	25.8357	Hyper
NC_019478.2	32707880	32707957	77	10	0.0656	0.5538	-0.4883	-54.0792	Hypo		NC_019467.2	29941726	29941815	89	6	0.7427	0.1642	0.5784	24.853	Hyper
NC_019459.2	247699720	247699891	171	13	0.1914	0.6797	-0.4883	-55.8152	Hypo		NC_019479.2	42226430	42226600	170	8	0.6985	0.1192	0.5792	39.0609	Hyper
NC_019476.2	60426041	60426163	122	13	0.2436	0.7315	-0.4879	-58.0531	Hypo		NC_019479.2	50504067	50504163	96	4	0.6985	0.1192	0.5792	14.9205	Hyper
NC_019471.2	33614028	33614113	85	4	0.1856	0.6734	-0.4878	-17.1199	Hypo		NC_019484.2	110930198	110930343	145	8	0.7184	0.1388	0.5797	39.1768	Hyper
NC_019470.2	22703663	22703815	152	8	0.1746	0.6624	-0.4878	-29.4392	Hypo		NC_019477.2	250120	250196	76	4	0.7203	0.1399	0.5804	18.6452	Hyper
NC_019479.2	46756758	46756943	185	14	0.1234	0.6111	-0.4876	-97.8497	Hypo		NC_019477.2	15076923	15076995	72	4	0.7071	0.1264	0.5807	15.077	Hyper
NC_019469.2	47282170	47282271	101	6	0.1461	0.6335	-0.4874	-20.6815	Hypo		NC_019469.2	47341007	47341108	101	5	0.7358	0.1548	0.581	19.3006	Hyper
NC_019461.2	95770898	95770979	81	8	0.1611	0.6484	-0.4873	-30.4954	Hypo		NC_019478.2	45227170	45227270	100	9	0.7282	0.1473	0.581	45.9672	Hyper
NC_019460.2	60714513	60714583	70	5	0.1974	0.6846	-0.4872	-18.6538	Hypo		NC_019475.2	65791413	65791479	66	8	0.7123	0.1312	0.5811	38.0687	Hyper
NC_019483.2	29366	29477	111	7	0.1692	0.6564	-0.4871	-24.3389	Hypo		NC_019480.2	49742750	49742823	73	5	0.7307	0.1488	0.5819	19.7542	Hyper
NC_019483.2	40961411	40961494	83	7	0.1692	0.6564	-0.4871	-24.335	Hypo		NC_019470.2	54605915	54605979	64	6	0.7032	0.1208	0.5824	25.5902	Hyper
NC_019473.2	12644155	12644250	95	4	0.0661	0.5531	-0.487	-14.826	Hypo		NC_019478.2	43704719	43704806	87	6	0.7109	0.1275	0.5833	25.1402	Hyper
NC_019469.2	75596634	75596792	158	16	0.1545	0.6413	-0.4867	-98.1575	Hypo		NC_019478.2	43542308	43542369	61	6	0.7109	0.1275	0.5833	25.1388	Hyper
NC_019470.2	53070584	53070673	89	10	0.1483	0.6351	-0.4867	-40.6543	Hypo		NC_019474.2	44475985	44476065	80	4	0.7083	0.1244	0.5839	16.2013	Hyper
NC_019470.2	41562961	41563123	162	8	0.2018	0.6883	-0.4865	-34.6652	Hypo		NC_019461.2	77054155	77054272	117	9	0.7304	0.1462	0.5842	46.0326	Hyper
NC_019480.2	47893577	47893667	90	4	0.0804	0.5666	-0.4862	-14.9244	Hypo		NC_019467.2	86255130	86255228	98	4	0.7341	0.1498	0.5843	14.6896	Hyper
NC_019462.2	107814543	107814679	136	9	0.0799	0.566	-0.4861	-50.8154	Hypo		NC_019471.2	25775050	25775193	143	11	0.7419	0.1576	0.5844	65.4422	Hyper
NC_019479.2	33881738	33881793	55	7	0.0737	0.5595	-0.4858	-32.381	Hypo		NC_019475.2	66708265	66708355	90	9	0.7652	0.1806	0.5846	43.8675	Hyper
NC_019470.2	74056217	74056299	82	7	0.1487	0.6345	-0.4858	-25.09	Hypo		NC_019480.2	45449333	45449390	57	6	0.6997	0.1146	0.5851	28.2115	Hyper
NC_019460.2	99763306	99763370	64	7	0.1227	0.6085	-0.4858	-27.102	Hypo		NC_019462.2	5083554	5083691	137	6	0.7025	0.1168	0.5857	32.2607	Hyper
NC_019468.2	55884478	55884536	58	6	0.1374	0.623	-0.4856	-22.907	Hypo		NC_019479.2	43397377	43397454	77	6	0.6985	0.1123	0.5861	26.8795	Hyper
NC_019460.2	1358951	1359008	57	11	0.14	0.6257	-0.4856	-46.8588	Hypo		NC_019471.2	48696423	48696565	142	7	0.7313	0.1447	0.5866	31.1939	Hyper
NC_019461.2	7548126	7548535	409	17	0.1764	0.6618	-0.4854	-105.672	Hypo		NC_019460.2	37551885	37551975	90	4	0.7048	0.1179	0.5869	14.9672	Hyper
NC_019468.2	23809638	23809761	123	9	0.1247	0.6101	-0.4854	-40.0282	Hypo		NC_019460.2	220075653	220075710	57	5	0.6879	0.1007	0.5871	21.2656	Hyper
NC_019468.2	52953999	52954269	270	8	0.0743	0.5597	-0.4854	-35.3752	Hypo		NC_019472.2	29046416	29046516	100	6	0.7402	0.1525	0.5877	25.289	Hyper
NC_019483.2	39376036	39376103	67	8	0.1578	0.643	-0.4852	-29.1012	Hypo		NC_019468.2	22283875	22283971	96	6	0.6969	0.1092	0.5878	27.3504	Hyper
NC_019460.2	2395895	2395959	64	6	0.1114	0.5967	-0.4852	-22.3761	Hypo		NC_019475.2	4575181	4575269	88	5	0.7419	0.1542	0.5878	19.6135	Hyper
NC_019474.2	18016627	18016789	162	9	0.2253	0.7102	-0.4849	-41.0725	Hypo		NC_019471.2	20985616	20985702	86	4	0.7743	0.1864	0.5879	14.1986	Hyper
NC_019462.2	102959232	102959332	100	12	0.1123	0.5972	-0.4849	-57.8365	Hypo		NC_019462.2	3708679	3708744	65	5	0.7342	0.1457	0.5885	19.4912	Hyper
NC_019473.2	47703834	47703924	90	4	0.0684	0.5531	-0.4848	-14.4142	Hypo		NC_019462.2	7459390	7459455	65	5	0.7342	0.1457	0.5885	19.4877	Hyper
NC_019480.2	47225736	47225860	124	8	0.1055	0.5902	-0.4847	-35.0019	Hypo		NC_019484.2	76317660	76317840	180	6	0.7486	0.1602	0.5885	33.186	Hyper
NC_019461.2	49500656	49500744	88	5	0.1243	0.6089	-0.4846	-20.8771	Hypo		NC_019471.2	10627892	10628027	135	10	0.7241	0.135	0.589	58.4521	Hyper
NC_019470.2	77105579	77105643	64	6	0.1077	0.5921	-0.4845	-22.5182	Hypo		NC_019475.2	33098781	33098857	76	7	0.6866	0.0975	0.5891	34.3959	Hyper
NC_019483.2	42814408	42814478	70	4	0.1255	0.61	-0.4845	-13.0892	Hypo		NC_019475.2	15604532	15604584	52	7	0.6866	0.0975	0.5891	34.2425	Hyper
NC_019477.2	50290647	50290790	143	27	0.2139	0.6975	-0.4837	-171.344	Hypo		NC_019471.2	45319957	45320047	90	5	0.7393	0.1501	0.5892	19.5658	Hyper
NC_019467.2	15849075	15849131	56	4	0.0785	0.5622	-0.4837	-14.3579	Hypo		NC_019480.2	48532781	48532973	192	8	0.801	0.2118	0.5892	40.9006	Hyper
NC_019461.2	76188691	76188957	266	7	0.2033	0.6869	-0.4836	-30.6443	Hypo		NC_019477.2	10694684	10694770	86	4	0.6911	0.1017	0.5894	18.6879	Hyper
NC_019470.2	77366333	77366436	103	14	0.1691	0.6528	-0.4836	-65.8593	Hypo		NC_019469.2	3775441	3775521	80	5	0.7358	0.1462	0.5897	20.0003	Hyper
NC_019473.2	71633525	71633623	98	11	0.1233	0.6068	-0.4835	-48.7603	Hypo		NC_019471.2	10770006	10770098	92	8	0.7092	0.1193	0.5899	39.4372	Hyper
NC_019471.2	53272467	53272636	169	8	0.1624	0.6457	-0.4833	-34.2475	Hypo		NC_019461.2	113621110	113621190	80	8	0.7684	0.178	0.5904	39.4467	Hyper
NC_019459.2	243452574	243452675	101	11	0.1655	0.6487	-0.4832	-45.3842	Hypo		NC_019475.2	25304217	25304286	69	5	0.709	0.1184	0.5906	22.4929	Hyper
NC_019478.2	44748894	44748990	96	7	0.1513	0.6344	-0.4831	-27.8238	Hypo		NC_019481.2	40940969	40941058	89	4	0.7284	0.1375	0.5909	15.0831	Hyper
NC_019459.2	116818196	116818288	92	11	0.1101	0.5932	-0.4831	-47.1966	Hypo		NC_019460.2	24632999	24633076	77	5	0.7352	0.1439	0.5913	19.8772	Hyper
NC_019460.2	100729343	100729452	109	7	0.1662	0.6491	-0.4829	-24.3641	Hypo		NC_019476.2	39110449	39110540	91	6	0.7413	0.1497	0.5916	25.661	Hyper
NC_019480.2	60525559	60525675	116	7	0.3565	0.8393	-0.4828	-27.3058	Hypo		NC_019471.2	24945781	24945859	78	5	0.7109	0.1191	0.5918	21.0728	Hyper
NC_019460.2	6581934	6582076	142	5	0.3208	0.8033	-0.4824	-19.2287	Hypo		NC_019462.2	4396187	4396280	93	9	0.7513	0.1595	0.5918	44.7027	Hyper
NC_019471.2	48544804	48545005	201	8	0.0858	0.568	-0.4822	-39.295	Hypo		NC_019469.2	42490373	42490437	64	4	0.7187	0.1268	0.5919	17.5297	Hyper
NC_019466.2	16185765	16185881	116	7	0.0942	0.5764	-0.4822	-26.2928	Hypo		NC_019459.2	230756893	230757021	128	6	0.7486	0.1556	0.593	26.5761	Hyper
NC_019462.2	40924355	40924428	73	9	0.1623	0.6443	-0.4821	-34.1914	Hypo		NC_019471.2	60188587	60188674	87	7	0.7313	0.138	0.5933	32.0961	Hyper
NC_019462.2	105512553	105512613	60	9	0.1623	0.6443	-0.4821	-34.1774	Hypo		NC_019481.2	41656701	41656811	110	11	0.6713	0.0778	0.5935	87.0533	Hyper
NC_019483.2	40451245	40451335	90	6	0.1352	0.6173	-0.4821	-20.6694	Hypo		NC_019468.2	22811752	22811836	84	5	0.7281	0.1344	0.5937	20.2788	Hyper
NC_019474.2	63253303	63253398	95	4	0.132	0.614	-0.482	-13.2907	Hypo		NC_019468.2	16916515	16916582	67	5	0.7281	0.1344	0.5937	20.2699	Hyper
NC_019465.2	47125632	47125693	61	5	0.0651	0.5471	-0.482	-20.5473	Hypo		NC_019471.2	11321876	11321941	65	6	0.7092	0.1148	0.5943	26.7286	Hyper
NC_019466.2	4679047	4679142	95	9	0.1407	0.6227	-0.482	-33.8979	Hypo		NC_019470.2	28884500	28884587	87	11	0.7386	0.1437	0.5949	66.898	Hyper
NC_019460.2	215471375	215476026	4651	15	0.1622	0.6439	-0.4817	-56.6257	Hypo		NC_019470.2	77687457	77688201	744	9	0.7202	0.1253	0.5949	35.7652	Hyper
NC_019467.2	33811157	33811411	254	10	0.1272	0.6088	-0.4817	-50.0818	Hypo		NC_019469.2	48702691	48702828	137	7	0.7261	0.1303	0.5958	39.3084	Hyper
NC_019476.2	41381580	41381705	125	8	0.1881	0.6697	-0.4817	-29.0753	Hypo		NC_019460.2	8937831	8938023	192	5	0.749	0.1521	0.597	22.3038	Hyper
NC_019484.2	49528629	49528698	69	8	0.1023	0.5838	-0.4816	-33.2019	Hypo		NC_019464.2	25709849	25709934	85	6	0.7404	0.1431	0.5973	26.5112	Hyper
NC_019483.2	38800505	38800640	135	6	0.2305	0.7121	-0.4815	-22.8619	Hypo		NC_019462.2	16117259	16117326	67	5	0.7342	0.1361	0.5981	20.2942	Hyper
NC_019472.2	80617639	80617811	172	15	0.1698	0.6511	-0.4813	-81.8568	Hypo		NC_019478.2	2756111	2756210	99	5	0.7129	0.1144	0.5985	21.3451	Hyper
NC_019481.2	39268147	39268205	58	6	0.0967	0.5778	-0.4811	-27.0486	Hypo		NC_019472.2	75400080	75400254	174	10	0.7106	0.1118	0.5989	61.9626	Hyper
NC_019480.2	2409727	2409977	250	15	0.0998	0.5809	-0.4811	-87.4523	Hypo		NC_019472.2	77981809	77981910	101	4	0.7124	0.1135	0.5989	15.7879	Hyper
NC_019481.2	32972787	32972939	152	6	0.1004	0.5813	-0.4809	-24.6144	Hypo		NC_019471.2	48405289	48405390	101	5	0.7393	0.1402	0.5991	20.3969	Hyper
NC_019468.2	21766084	21766258	174	14	0.1864	0.6673	-0.4809	-70.0284	Hypo		NC_019481.2	25427885	25427986	101	7	0.7494	0.1502	0.5991	32.9982	Hyper
NC_019458.2	119127972	119128096	124	6	0.1793	0.6598	-0.4805	-18.6556	Hypo		NC_019481.2	25114461	25114524	63	7	0.7494	0.1502	0.5991	32.9978	Hyper
NC_019468.2	60317728	60317866	138	7	0.0775	0.5581	-0.4805	-31.8605	Hypo		NC_019460.2	83917729	83917812	83	5	0.7352	0.135	0.6002	20.5961	Hyper
NC_019460.2	1711241	1711342	101	11	0.2001	0.6804	-0.4802	-45.6486	Hypo		NC_019464.2	9622907	9623063	156	10	0.7115	0.1107	0.6009	63.6276	Hyper
NC_019464.2	97544785	97544865	80	7	0.1285	0.6086	-0.4801	-27.6841	Hypo		NC_019468.2	15620723	15620843	120	6	0.7249	0.1235	0.6014	27.4202	Hyper
NC_019470.2	77007374	77007795	421	13	0.1518	0.6319	-0.4801	-67.0135	Hypo		NC_019470.2	61235787	61235886	99	5	0.7052	0.1029	0.6023	22.3202	Hyper
NC_019482.2	43916417	43916532	115	11	0.0527	0.5328	-0.48	-67.0929	Hypo		NC_019460.2	214465139	214465293	154	6	0.7166	0.1138	0.6029	29.1053	Hyper
NC_019482.2	27146719	27146773	54	4	0.0835	0.5635	-0.48	-14.5937	Hypo		NC_019476.2	48403262	48403404	142	8	0.7811	0.1769	0.6043	39.7741	Hyper
NC_019461.2	71928285	71928385	100	5	0.1445	0.6245	-0.48	-16.8515	Hypo		NC_019476.2	49208238	49208328	90	5	0.7679	0.1636	0.6043	20.5863	Hyper
NC_019462.2	16002082	16002245	163	12	0.127	0.6069	-0.4799	-56.1019	Hypo		NC_019461.2	117781370	117781451	81	5	0.7331	0.128	0.6051	22.332	Hyper
NC_019467.2	84539593	84539872	279	15	0.1488	0.6284	-0.4795	-68.4665	Hypo		NC_019462.2	3890821	3890899	78	5	0.7342	0.1285	0.6057	20.979	Hyper
NC_019459.2	227717736	227719349	1613	25	0.3271	0.8067	-0.4795	-172.29	Hypo		NC_019478.2	44619612	44619702	90	5	0.7407	0.1346	0.606	20.7106	Hyper
NC_019469.2	3507008	3507060	52	7	0.1669	0.6461	-0.4791	-23.9695	Hypo		NC_019478.2	6522433	6522509	76	5	0.7407	0.1346	0.606	20.7099	Hyper
NC_019460.2	178061300	178061444	144	6	0.1327	0.6117	-0.479	-23.9816	Hypo		NC_019484.2	60880988	60881163	175	6	0.7759	0.1697	0.6062	40.5069	Hyper
NC_019468.2	45344643	45344729	86	14	0.178	0.6569	-0.4789	-69.2527	Hypo		NC_019468.2	24555481	24555535	54	5	0.7281	0.1215	0.6066	21.3886	Hyper
NC_019473.2	71312472	71312541	69	4	0.0809	0.5597	-0.4788	-14.8453	Hypo		NC_019471.2	53413645	53413744	99	5	0.7393	0.1323	0.6069	21.097	Hyper
NC_019476.2	35073538	35073622	84	6	0.1963	0.675	-0.4788	-20.6012	Hypo		NC_019468.2	49883876	49883975	99	5	0.7281	0.1209	0.6073	21.4213	Hyper
NC_019460.2	207211175	207211264	89	7	0.1446	0.6232	-0.4786	-24.6458	Hypo		NC_019471.2	9790064	9790165	101	5	0.7393	0.1315	0.6077	21.1214	Hyper
NC_019460.2	106300316	106300463	147	9	0.1114	0.5899	-0.4784	-42.3234	Hypo		NC_019476.2	41353953	41354013	60	6	0.7998	0.1921	0.6077	27.8433	Hyper
NC_019460.2	59114501	59114686	185	8	0.2516	0.73	-0.4784	-28.4825	Hypo		NC_019460.2	128706641	128706719	78	4	0.7258	0.1179	0.6078	16.0556	Hyper
NC_019480.2	2199281	2199466	185	9	0.096	0.5742	-0.4782	-41.2587	Hypo		NC_019461.2	114333302	114333388	86	6	0.7516	0.1429	0.6087	30.6325	Hyper
NC_019474.2	64909993	64910087	94	7	0.1696	0.6475	-0.4779	-25.106	Hypo		NC_019483.2	34999645	34999735	90	5	0.7811	0.1723	0.6088	22.5447	Hyper
NC_019460.2	118223365	118223458	93	5	0.0844	0.5621	-0.4777	-20.154	Hypo		NC_019482.2	1505805	1505892	87	6	0.7062	0.0972	0.609	30.2261	Hyper
NC_019462.2	34877547	34877901	354	25	0.1452	0.6227	-0.4775	-152.174	Hypo		NC_019471.2	44915839	44915919	80	7	0.7668	0.1577	0.6092	33.6671	Hyper
NC_019470.2	74265972	74266036	64	7	0.2894	0.7668	-0.4774	-23.9802	Hypo		NC_019466.2	3132007	3132102	95	4	0.7161	0.1069	0.6092	18.0003	Hyper
NC_019478.2	36560526	36560737	211	12	0.108	0.5853	-0.4773	-62.5545	Hypo		NC_019462.2	77226312	77226381	69	6	0.7513	0.1413	0.6099	27.1178	Hyper
NC_019459.2	206744971	206745100	129	8	0.143	0.6203	-0.4773	-35.9208	Hypo		NC_019474.2	64560532	64560618	86	5	0.7118	0.1015	0.6103	23.1488	Hyper
NC_019471.2	10613014	10613149	135	8	0.2598	0.737	-0.4772	-29.2595	Hypo		NC_019479.2	42815533	42815610	77	7	0.7219	0.1113	0.6106	35.9327	Hyper
NC_019484.2	42122876	42122977	101	8	0.1068	0.5838	-0.4771	-32.4176	Hypo		NC_019475.2	63932192	63932271	79	7	0.7007	0.0899	0.6107	37.4005	Hyper
NC_019468.2	11229877	11230015	138	7	0.0812	0.5582	-0.4769	-31.5653	Hypo		NC_019481.2	451531	451627	96	5	0.734	0.1228	0.6112	22.7231	Hyper
NC_019473.2	7337302	7337391	89	6	0.1213	0.5981	-0.4768	-19.9618	Hypo		NC_019472.2	74547617	74547668	51	7	0.714	0.1026	0.6114	35.4681	Hyper
NC_019477.2	10628030	10628093	63	6	0.1572	0.6338	-0.4766	-19.8258	Hypo		NC_019471.2	9209255	9209340	85	6	0.7665	0.1544	0.6121	27.2703	Hyper
NC_019470.2	81419250	81419500	250	12	0.115	0.5917	-0.4766	-57.7828	Hypo		NC_019474.2	66314700	66314792	92	5	0.7544	0.1422	0.6122	21.615	Hyper
NC_019467.2	14849199	14849266	67	4	0.0856	0.5622	-0.4766	-13.5784	Hypo		NC_019474.2	66179572	66179646	74	5	0.7544	0.1422	0.6122	21.6132	Hyper
NC_019469.2	76307652	76307732	80	4	0.0847	0.5608	-0.4761	-14.0411	Hypo		NC_019472.2	74747048	74748297	1249	9	0.7406	0.1276	0.6131	57.0059	Hyper
NC_019467.2	84596579	84596720	141	14	0.1425	0.6186	-0.4761	-74.2336	Hypo		NC_019470.2	53210056	53210115	59	5	0.7338	0.1197	0.6141	22.4767	Hyper
NC_019460.2	333890	333964	74	6	0.2282	0.7039	-0.4757	-22.4147	Hypo		NC_019470.2	77546510	77546563	53	4	0.7694	0.1551	0.6144	16.0052	Hyper
NC_019479.2	49706491	49706643	152	20	0.0982	0.5738	-0.4756	-134.453	Hypo		NC_019484.2	1275157	1275249	92	5	0.7487	0.1342	0.6145	22.8428	Hyper
NC_019472.2	55810062	55810116	54	4	0.072	0.5476	-0.4755	-14.1738	Hypo		NC_019460.2	159310	159411	101	10	0.7048	0.0895	0.6153	61.7998	Hyper
NC_019483.2	13598249	13598517	268	8	0.0929	0.5684	-0.4755	-36.0576	Hypo		NC_019460.2	78050048	78050105	57	5	0.702	0.0866	0.6154	27.3497	Hyper
NC_019467.2	84864459	84864551	92	13	0.1012	0.5767	-0.4755	-70.1925	Hypo		NC_019478.2	49047149	49047233	84	9	0.7381	0.1226	0.6155	56.4645	Hyper
NC_019477.2	43171919	43171971	52	7	0.1186	0.5939	-0.4753	-28.5788	Hypo		NC_019476.2	47181321	47181470	149	8	0.7597	0.1439	0.6158	42.1032	Hyper
NC_019472.2	40585561	40585668	107	7	0.1136	0.5888	-0.4752	-25.7383	Hypo		NC_019471.2	10932688	10932751	63	7	0.7422	0.1263	0.6159	34.9477	Hyper
NC_019468.2	49567315	49567396	81	4	0.0759	0.5512	-0.4752	-14.2518	Hypo		NC_019469.2	60676559	60676650	91	6	0.7871	0.1709	0.6161	29.5171	Hyper
NC_019483.2	5599007	5599105	98	6	0.1571	0.6323	-0.4752	-23.4882	Hypo		NC_019481.2	14103613	14103782	169	8	0.7284	0.1114	0.617	44.4406	Hyper
NC_019480.2	33345534	33345637	103	11	0.1591	0.6344	-0.4752	-46.2959	Hypo		NC_019474.2	44741748	44741828	80	4	0.7877	0.1707	0.6171	16.2579	Hyper
NC_019460.2	128357764	128357861	97	4	0.0767	0.552	-0.4752	-14.3763	Hypo		NC_019478.2	45040031	45040130	99	9	0.7573	0.1398	0.6175	49.1451	Hyper
NC_019460.2	222208524	222208603	79	9	0.0674	0.5425	-0.4751	-43.8207	Hypo		NC_019460.2	136813630	136813718	88	5	0.7615	0.1439	0.6176	21.694	Hyper
NC_019465.2	80459590	80459665	75	7	0.0974	0.5722	-0.4748	-25.6046	Hypo		NC_019481.2	8662104	8662279	175	8	0.7631	0.1454	0.6177	42.8085	Hyper
NC_019480.2	60013831	60013949	118	13	0.069	0.5438	-0.4748	-66.2805	Hypo		NC_019476.2	59002797	59002862	65	4	0.7758	0.1573	0.6186	19.8998	Hyper
NC_019484.2	79696053	79696154	101	4	0.0901	0.5647	-0.4746	-14.2087	Hypo		NC_019474.2	4590292	4590357	65	7	0.7889	0.17	0.619	35.1943	Hyper
NC_019460.2	33688684	33688761	77	5	0.1401	0.6147	-0.4746	-16.2159	Hypo		NC_019475.2	64243433	64243561	128	7	0.7137	0.0946	0.6191	40.181	Hyper
NC_019474.2	4034443	4034578	135	9	0.178	0.6525	-0.4745	-34.9691	Hypo		NC_019483.2	35018656	35018746	90	5	0.7811	0.1613	0.6198	23.0259	Hyper
NC_019463.2	68419395	68419534	139	8	0.2216	0.696	-0.4744	-28.383	Hypo		NC_019471.2	59135091	59135153	62	11	0.7487	0.1285	0.6202	67.484	Hyper
NC_019481.2	41877554	41877651	97	7	0.132	0.6061	-0.4742	-31.1521	Hypo		NC_019471.2	7571098	7571178	80	10	0.786	0.1658	0.6202	57.7349	Hyper
NC_019477.2	48853300	48853406	106	10	0.1772	0.6512	-0.4741	-37.98	Hypo		NC_019470.2	63870135	63870191	56	5	0.7338	0.1136	0.6202	22.3258	Hyper
NC_019484.2	5494636	5494741	105	5	0.1131	0.5872	-0.4741	-20.9064	Hypo		NC_019467.2	28259228	28259517	289	13	0.7503	0.1301	0.6203	90.5733	Hyper
NC_019484.2	42667390	42667475	85	4	0.0907	0.5647	-0.4739	-14.0061	Hypo		NC_019470.2	15205348	15205450	102	5	0.7052	0.0848	0.6204	24.6998	Hyper
NC_019473.2	2294083	2294344	261	10	0.0688	0.5422	-0.4735	-51.3212	Hypo		NC_019481.2	1924218	1924325	107	7	0.7829	0.1615	0.6214	36.0142	Hyper
NC_019473.2	66279721	66279861	140	8	0.1043	0.5778	-0.4735	-33.5272	Hypo		NC_019464.2	71137438	71137556	118	7	0.7141	0.0915	0.6227	40.5086	Hyper
NC_019474.2	51875794	51875862	68	4	0.1507	0.624	-0.4733	-14.2491	Hypo		NC_019471.2	51945357	51945458	101	7	0.7894	0.1665	0.6229	35.1322	Hyper
NC_019469.2	40973999	40974068	69	6	0.1461	0.6185	-0.4724	-19.8461	Hypo		NC_019474.2	44576035	44576126	91	6	0.7704	0.1468	0.6236	28.9803	Hyper
NC_019460.2	221698528	221698681	153	14	0.0736	0.5458	-0.4722	-79.602	Hypo		NC_019469.2	41708598	41708686	88	4	0.7264	0.1022	0.6242	17.7965	Hyper
NC_019465.2	88652858	88652977	119	7	0.0767	0.5487	-0.472	-31.567	Hypo		NC_019474.2	70967959	70968113	154	8	0.7693	0.1439	0.6254	43.817	Hyper
NC_019463.2	113027250	113027463	213	14	0.1877	0.6595	-0.4718	-60.7546	Hypo		NC_019471.2	14211928	14212004	76	4	0.7493	0.1232	0.6261	16.9023	Hyper
NC_019466.2	93580165	93580250	85	10	0.2884	0.7601	-0.4717	-37.4806	Hypo		NC_019482.2	33342216	33342311	95	4	0.7301	0.1036	0.6265	18.9196	Hyper
NC_019465.2	89459234	89459340	106	4	0.071	0.5425	-0.4715	-14.4558	Hypo		NC_019479.2	48712976	48713076	100	7	0.7219	0.0951	0.6268	40.3498	Hyper
NC_019468.2	5339003	5339116	113	10	0.2099	0.6813	-0.4714	-38.074	Hypo		NC_019471.2	57077456	57077538	82	4	0.7307	0.1032	0.6275	17.6799	Hyper
NC_019465.2	16337005	16337222	217	6	0.0812	0.5525	-0.4713	-34.1919	Hypo		NC_019460.2	20504516	20504589	73	5	0.749	0.1214	0.6276	22.8163	Hyper
NC_019484.2	6691881	6692016	135	5	0.0773	0.5484	-0.4712	-18.8223	Hypo		NC_019471.2	17585968	17586043	75	7	0.7313	0.103	0.6283	37.821	Hyper
NC_019467.2	21483752	21484083	331	27	0.1196	0.5908	-0.4712	-175.731	Hypo		NC_019474.2	5962595	5962734	139	6	0.7162	0.0873	0.6289	36.7522	Hyper
NC_019476.2	58585696	58586068	372	32	0.2133	0.6845	-0.4711	-202.184	Hypo		NC_019462.2	36364242	36364366	124	9	0.7531	0.1239	0.6291	52.1424	Hyper
NC_019469.2	78986289	78986474	185	15	0.1028	0.5738	-0.4709	-82.2775	Hypo		NC_019468.2	44239109	44239201	92	7	0.7568	0.1256	0.6312	37.6848	Hyper
NC_019478.2	45582254	45582548	294	23	0.2244	0.6953	-0.4709	-141.79	Hypo		NC_019481.2	29783479	29783563	84	9	0.804	0.1715	0.6325	52.617	Hyper
NC_019474.2	58713419	58713487	68	4	0.0906	0.5612	-0.4706	-14.3643	Hypo		NC_019481.2	34656510	34656576	66	5	0.7569	0.1244	0.6325	23.658	Hyper
NC_019465.2	73825891	73825969	78	4	0.0951	0.5657	-0.4706	-13.0846	Hypo		NC_019460.2	3649288	3649504	216	16	0.7239	0.0913	0.6326	162.393	Hyper
NC_019460.2	103997134	103997380	246	11	0.1053	0.5759	-0.4706	-55.5864	Hypo		NC_019476.2	10626436	10626497	61	5	0.8076	0.1748	0.6328	24.1602	Hyper
NC_019480.2	251390	251515	125	5	0.1452	0.6157	-0.4704	-23.2934	Hypo		NC_019460.2	539549	539648	99	5	0.7352	0.1012	0.634	23.8691	Hyper
NC_019476.2	21887894	21887979	85	10	0.2185	0.6887	-0.4702	-40.5005	Hypo		NC_019459.2	2226635	2226742	107	4	0.7224	0.0871	0.6353	19.2622	Hyper
NC_019480.2	78730	78886	156	9	0.0778	0.5479	-0.4701	-58.1333	Hypo		NC_019462.2	5649176	5649255	79	7	0.7698	0.134	0.6359	37.5499	Hyper
NC_019459.2	2969701	2969978	277	18	0.2211	0.6912	-0.47	-96.5191	Hypo		NC_019468.2	54740451	54740572	121	7	0.7663	0.1296	0.6366	37.6062	Hyper
NC_019458.2	197600315	197600435	120	8	0.1062	0.5761	-0.4698	-29.3602	Hypo		NC_019461.2	117435360	117435438	78	5	0.7757	0.1381	0.6376	24.3287	Hyper
NC_019478.2	32102425	32102704	279	14	0.1948	0.6644	-0.4696	-71.6151	Hypo		NC_019461.2	98783049	98783147	98	4	0.7683	0.1306	0.6377	18.4753	Hyper
NC_019460.2	136563270	136563358	88	7	0.0962	0.5657	-0.4695	-30.9753	Hypo		NC_019462.2	58843804	58843881	77	5	0.7342	0.096	0.6382	24.3498	Hyper
NC_019471.2	39817390	39817460	70	4	0.0802	0.5496	-0.4694	-14.0612	Hypo		NC_019468.2	30109091	30109165	74	4	0.7645	0.1243	0.6402	20.2396	Hyper
NC_019476.2	15605929	15606003	74	6	0.1675	0.637	-0.4694	-19.4582	Hypo		NC_019474.2	64370546	64370697	151	6	0.7258	0.0853	0.6405	34.9503	Hyper
NC_019478.2	48007037	48007111	74	6	0.1209	0.5901	-0.4692	-20.5502	Hypo		NC_019479.2	23211389	23211489	100	5	0.7303	0.0892	0.6411	25.7269	Hyper
NC_019483.2	27880049	27880125	76	6	0.1481	0.6173	-0.4691	-19.1617	Hypo		NC_019478.2	44374604	44374680	76	5	0.7776	0.1346	0.643	23.4069	Hyper
NC_019466.2	31842166	31842274	108	10	0.1291	0.5981	-0.469	-42.113	Hypo		NC_019460.2	4735829	4735919	90	6	0.7797	0.1365	0.6432	31.264	Hyper
NC_019483.2	31567263	31567351	88	7	0.1113	0.5799	-0.4687	-27.8318	Hypo		NC_019460.2	208788228	208788365	137	7	0.7458	0.1022	0.6437	44.9454	Hyper
NC_019468.2	57519481	57519567	86	13	0.1445	0.6132	-0.4686	-62.6348	Hypo		NC_019477.2	8340105	8340199	94	5	0.7313	0.0873	0.644	28.4681	Hyper
NC_019482.2	41721418	41721503	85	10	0.0784	0.5469	-0.4685	-50.8792	Hypo		NC_019476.2	16232685	16232781	96	6	0.7826	0.1386	0.644	32.1874	Hyper
NC_019473.2	28395926	28395983	57	7	0.1137	0.5822	-0.4685	-24.3242	Hypo		NC_019481.2	38848642	38848743	101	6	0.7928	0.1485	0.6443	31.5583	Hyper
NC_019475.2	30465625	30465762	137	17	0.0842	0.5523	-0.4682	-84.8671	Hypo		NC_019481.2	11206617	11206703	86	6	0.8047	0.159	0.6456	33.1364	Hyper
NC_019460.2	222333709	222333801	92	9	0.1455	0.6136	-0.4682	-38.0183	Hypo		NC_019481.2	34177495	34177588	93	7	0.7893	0.1435	0.6458	41.7254	Hyper
NC_019464.2	68844989	68845111	122	5	0.0668	0.5346	-0.4679	-18.6228	Hypo		NC_019476.2	21743264	21743346	82	4	0.799	0.1533	0.6458	18.3164	Hyper
NC_019459.2	233318848	233318935	87	5	0.126	0.5938	-0.4679	-18.0493	Hypo		NC_019484.2	76989207	76989308	101	4	0.7397	0.0932	0.6465	22.2774	Hyper
NC_019482.2	758969	759252	283	10	0.0904	0.5582	-0.4678	-54.1266	Hypo		NC_019481.2	7689186	7689287	101	5	0.7837	0.1332	0.6505	25.0825	Hyper
NC_019464.2	21148570	21148622	52	5	0.3917	0.8592	-0.4676	-18.6943	Hypo		NC_019460.2	218637168	218637252	84	5	0.7729	0.122	0.6509	24.6913	Hyper
NC_019476.2	6328433	6328575	142	5	0.1194	0.5871	-0.4676	-18.5896	Hypo		NC_019474.2	66379209	66379298	89	4	0.766	0.1148	0.6512	18.93	Hyper
NC_019471.2	52631262	52631340	78	4	0.1032	0.5707	-0.4675	-13.4659	Hypo		NC_019465.2	12443703	12443920	217	7	0.7118	0.0607	0.6512	46.8433	Hyper
NC_019469.2	2071294	2071373	79	6	0.1549	0.6223	-0.4674	-19.0561	Hypo		NC_019472.2	56576978	56577073	95	4	0.7731	0.1217	0.6514	18.7447	Hyper
NC_019459.2	240866431	240866502	71	7	0.1042	0.571	-0.4668	-27.0074	Hypo		NC_019483.2	128528	128602	74	4	0.7714	0.1194	0.6519	19.7728	Hyper
NC_019476.2	56503554	56503617	63	11	0.2847	0.7515	-0.4668	-42.388	Hypo		NC_019481.2	40623434	40623535	101	4	0.7899	0.1375	0.6525	18.9955	Hyper
NC_019474.2	17826416	17826501	85	8	0.1968	0.6635	-0.4667	-36.4138	Hypo		NC_019478.2	42025791	42025902	111	6	0.7376	0.0809	0.6567	37.0074	Hyper
NC_019460.2	1665948	1666027	79	8	0.155	0.6217	-0.4667	-27.9439	Hypo		NC_019482.2	34692227	34692317	90	4	0.7816	0.123	0.6586	19.7509	Hyper
NC_019482.2	44021080	44021184	104	7	0.1065	0.5727	-0.4662	-28.8734	Hypo		NC_019462.2	89762350	89762406	56	5	0.7407	0.0819	0.6588	30.9296	Hyper
NC_019481.2	34478003	34479352	1349	19	0.1938	0.6597	-0.4659	-115.417	Hypo		NC_019465.2	2528664	2528780	116	6	0.7656	0.1066	0.6589	34.9167	Hyper
NC_019465.2	83386512	83386595	83	7	0.1065	0.5722	-0.4657	-24.4937	Hypo		NC_019468.2	53868029	53868089	60	4	0.7645	0.1055	0.659	20.049	Hyper
NC_019478.2	2361756	2361849	93	7	0.1513	0.6168	-0.4655	-24.6126	Hypo		NC_019470.2	71692511	71692597	86	4	0.7694	0.1103	0.6591	19.3414	Hyper
NC_019466.2	21308982	21309089	107	9	0.097	0.5624	-0.4654	-41.6437	Hypo		NC_019462.2	37402295	37402415	120	10	0.7839	0.1231	0.6608	78.9718	Hyper
NC_019468.2	56563267	56563530	263	15	0.1611	0.6265	-0.4653	-75.6524	Hypo		NC_019465.2	25810525	25810588	63	4	0.8032	0.1417	0.6615	21.6451	Hyper
NC_019468.2	49592814	49592903	89	9	0.0882	0.5535	-0.4653	-43.1323	Hypo		NC_019474.2	51212458	51212558	100	4	0.7877	0.1244	0.6633	19.7692	Hyper
NC_019475.2	65124205	65124256	51	6	0.1393	0.6047	-0.4653	-19.4186	Hypo		NC_019483.2	20891594	20891695	101	6	0.8298	0.1628	0.6669	35.3853	Hyper
NC_019466.2	28570741	28570838	97	5	0.0745	0.5396	-0.4651	-18.5583	Hypo		NC_019484.2	192159	192234	75	5	0.7921	0.1249	0.6672	27.8598	Hyper
NC_019464.2	97951543	97951667	124	8	0.118	0.5829	-0.4649	-29.313	Hypo		NC_019472.2	62843984	62844075	91	8	0.7704	0.1017	0.6688	54.2586	Hyper
NC_019460.2	2059535	2059709	174	15	0.1763	0.6411	-0.4648	-72.0062	Hypo		NC_019471.2	11381770	11381837	67	6	0.7561	0.0843	0.6718	38.1589	Hyper
NC_019473.2	8316684	8316910	226	7	0.0739	0.5385	-0.4647	-32.0869	Hypo		NC_019460.2	136268471	136268552	81	5	0.7615	0.0865	0.675	28.1943	Hyper
NC_019468.2	41512148	41512258	110	14	0.1367	0.6011	-0.4644	-72.2264	Hypo		NC_019474.2	64768159	64768240	81	4	0.7875	0.1069	0.6807	21.6637	Hyper
NC_019467.2	22917736	22917810	74	6	0.1433	0.6076	-0.4643	-18.8739	Hypo		NC_019460.2	137050184	137050626	442	9	0.7601	0.0792	0.6809	53.748	Hyper
NC_019483.2	5132918	5132992	74	7	0.1603	0.6245	-0.4642	-25.9202	Hypo		NC_019474.2	66223727	66223807	80	4	0.7877	0.1048	0.6829	22.0098	Hyper
NC_019480.2	46946283	46946371	88	6	0.1266	0.5906	-0.464	-22.9994	Hypo		NC_019470.2	76042168	76042258	90	5	0.8248	0.1408	0.684	27.932	Hyper
NC_019477.2	50213104	50213319	215	22	0.1461	0.61	-0.4639	-130.619	Hypo		NC_019460.2	210207617	210207669	52	5	0.8072	0.1223	0.6849	28.7951	Hyper
NC_019459.2	7166086	7166194	108	8	0.2694	0.7333	-0.4639	-26.0151	Hypo		NC_019476.2	49989954	49990015	61	6	0.8368	0.1499	0.6869	36.9519	Hyper
NC_019471.2	12668255	12668355	100	8	0.1554	0.6192	-0.4638	-27.8193	Hypo		NC_019481.2	36141391	36141470	79	4	0.8031	0.1059	0.6972	23.4908	Hyper
NC_019462.2	10615033	10615350	317	12	0.1173	0.5809	-0.4635	-67.436	Hypo		NC_019470.2	59615397	59615480	83	4	0.8279	0.0778	0.75	29.184	Hyper
NC_019461.2	118060318	118060497	179	16	0.1325	0.5959	-0.4634	-85.9352	Hypo
NC_019473.2	68012054	68012163	109	7	0.1349	0.5982	-0.4632	-28.1074	Hypo
NC_019468.2	19568395	19568469	74	4	0.1899	0.6528	-0.4629	-14.5334	Hypo
NC_019462.2	22495966	22496029	63	4	0.0834	0.5461	-0.4628	-13.6263	Hypo
NC_019465.2	90388242	90388428	186	7	0.06	0.5222	-0.4622	-32.6671	Hypo
NC_019473.2	66259463	66259629	166	8	0.3036	0.7657	-0.4621	-32.6821	Hypo
NC_019466.2	93279279	93279443	164	13	0.1634	0.6255	-0.4621	-55.399	Hypo
NC_019468.2	44162647	44162791	144	16	0.1456	0.6076	-0.462	-78.7359	Hypo
NC_019476.2	9807823	9810210	2387	13	0.1491	0.611	-0.462	-57.6764	Hypo
NC_019480.2	56997560	56997650	90	5	0.0931	0.555	-0.4619	-16.7073	Hypo
NC_019482.2	7032022	7032087	65	5	0.0981	0.5599	-0.4618	-18.7258	Hypo
NC_019462.2	39989822	39990183	361	31	0.2393	0.7011	-0.4618	-209.233	Hypo
NC_019468.2	8118800	8118874	74	6	0.1137	0.5753	-0.4616	-20.3206	Hypo
NC_019468.2	57972178	57972352	174	4	0.0933	0.5549	-0.4616	-12.5262	Hypo
NC_019478.2	49427110	49427173	63	8	0.2358	0.6973	-0.4615	-43.2493	Hypo
NC_019484.2	78340143	78340231	88	7	0.0823	0.5437	-0.4614	-34.1186	Hypo
NC_019472.2	49156949	49157034	85	5	0.0885	0.5498	-0.4613	-19.4503	Hypo
NC_019460.2	207106147	207106237	90	8	0.1327	0.594	-0.4613	-29.0973	Hypo
NC_019476.2	46741891	46741989	98	4	0.3377	0.799	-0.4613	-13.3143	Hypo
NC_019478.2	47798698	47798788	90	13	0.2009	0.6621	-0.4612	-55.8144	Hypo
NC_019465.2	2751582	2751758	176	11	0.1082	0.5693	-0.4611	-55.7963	Hypo
NC_019461.2	116057027	116057133	106	9	0.0961	0.557	-0.4609	-43.3276	Hypo
NC_019460.2	220349450	220349672	222	9	0.0844	0.5453	-0.4609	-42.7262	Hypo
NC_019477.2	14458612	14458703	91	4	0.2722	0.733	-0.4608	-13.7209	Hypo
NC_019464.2	5596385	5596462	77	6	0.1371	0.5975	-0.4604	-18.8319	Hypo
NC_019474.2	9556444	9556534	90	6	0.1471	0.6074	-0.4603	-19.8033	Hypo
NC_019483.2	41932924	41933032	108	6	0.1571	0.6173	-0.4602	-18.4663	Hypo
NC_019459.2	243362254	243362354	100	9	0.1796	0.6396	-0.4601	-31.1983	Hypo
NC_019473.2	9219	9326	107	8	0.0934	0.5531	-0.4597	-32.1654	Hypo
NC_019472.2	50973272	50973373	101	11	0.172	0.6312	-0.4593	-49.9217	Hypo
NC_019461.2	118729100	118729214	114	12	0.1488	0.6081	-0.4592	-52.5017	Hypo
NC_019480.2	7734843	7734998	155	9	0.1464	0.6056	-0.4592	-34.4286	Hypo
NC_019464.2	97379436	97379524	88	10	0.178	0.6369	-0.4589	-40.1084	Hypo
NC_019470.2	44231328	44231436	108	8	0.1746	0.6334	-0.4588	-29.8752	Hypo
NC_019465.2	90221354	90221544	190	16	0.0988	0.5573	-0.4585	-80.2434	Hypo
NC_019466.2	75570811	75571236	425	10	0.0927	0.5512	-0.4585	-36.8801	Hypo
NC_019467.2	31161023	31161121	98	9	0.0937	0.5522	-0.4585	-39.7387	Hypo
NC_019470.2	72047663	72047869	206	5	0.0835	0.5417	-0.4582	-20.3014	Hypo
NC_019459.2	10616760	10617091	331	16	0.1314	0.5896	-0.4582	-94.6247	Hypo
NC_019473.2	70502988	70503257	269	13	0.1725	0.6306	-0.4581	-60.4757	Hypo
NC_019470.2	65319781	65319948	167	16	0.1226	0.5803	-0.4577	-84.439	Hypo
NC_019462.2	36374638	36374717	79	4	0.3028	0.7604	-0.4576	-13.676	Hypo
NC_019484.2	6167655	6167724	69	6	0.1355	0.5931	-0.4576	-24.2698	Hypo
NC_019468.2	26451226	26451303	77	7	0.1159	0.5735	-0.4576	-29.2396	Hypo
NC_019483.2	38705930	38706176	246	9	0.0948	0.5523	-0.4576	-44.926	Hypo
NC_019467.2	85936786	85937505	719	37	0.1756	0.6327	-0.4572	-209.714	Hypo
NC_019479.2	49943906	49944162	256	19	0.069	0.526	-0.457	-141.312	Hypo
NC_019479.2	42859084	42859201	117	11	0.1308	0.5878	-0.457	-48.1624	Hypo
NC_019484.2	442777	442917	140	9	0.2088	0.6658	-0.457	-40.5637	Hypo
NC_019468.2	52802453	52802635	182	15	0.2271	0.6841	-0.457	-68.8931	Hypo
NC_019459.2	37932751	37932804	53	6	0.1695	0.6265	-0.4569	-19.8592	Hypo
NC_019483.2	34704410	34704554	144	11	0.0971	0.5539	-0.4568	-52.4399	Hypo
NC_019472.2	45865879	45865939	60	7	0.1018	0.5583	-0.4565	-28.8296	Hypo
NC_019460.2	87921296	87921378	82	7	0.1066	0.5623	-0.4557	-27.4451	Hypo
NC_019462.2	105429073	105429167	94	8	0.1532	0.6086	-0.4554	-30.7494	Hypo
NC_019467.2	86239034	86239137	103	12	0.1525	0.6076	-0.4552	-48.7718	Hypo
NC_019464.2	17178055	17178130	75	7	0.1285	0.5836	-0.4551	-26.0332	Hypo
NC_019483.2	22727759	22727836	77	7	0.125	0.5799	-0.4549	-25.9619	Hypo
NC_019480.2	48108792	48108963	171	7	0.1246	0.5794	-0.4548	-27.7146	Hypo
NC_019466.2	39921649	39921750	101	9	0.0982	0.553	-0.4548	-36.7055	Hypo
NC_019459.2	234505201	234505408	207	9	0.2853	0.74	-0.4547	-35.9726	Hypo
NC_019469.2	77615137	77615242	105	9	0.0974	0.552	-0.4546	-41.1772	Hypo
NC_019461.2	32254880	32255028	148	11	0.2644	0.719	-0.4545	-43.4838	Hypo
NC_019460.2	1248024	1248129	105	11	0.0774	0.5318	-0.4545	-50.8041	Hypo
NC_019470.2	53114600	53114674	74	10	0.1704	0.6244	-0.454	-38.2277	Hypo
NC_019473.2	71252955	71253222	267	18	0.0909	0.5448	-0.4539	-101.639	Hypo
NC_019470.2	82819219	82819303	84	7	0.1249	0.578	-0.4532	-23.4799	Hypo
NC_019484.2	1517481	1517594	113	8	0.1172	0.5704	-0.4532	-37.371	Hypo
NC_019460.2	210603820	210603895	75	13	0.192	0.645	-0.453	-52.9379	Hypo
NC_019460.2	25385917	25385995	78	4	0.1823	0.6353	-0.453	-13.1037	Hypo
NC_019467.2	85778881	85778991	110	15	0.1092	0.5622	-0.453	-74.9345	Hypo
NC_019478.2	39714549	39714631	82	8	0.1621	0.6149	-0.4527	-26.8933	Hypo
NC_019469.2	78535127	78535336	209	12	0.1465	0.5991	-0.4526	-51.3763	Hypo
NC_019474.2	13764051	13764620	569	17	0.1071	0.5594	-0.4523	-134.256	Hypo
NC_019478.2	43586165	43586398	233	27	0.1918	0.6435	-0.4516	-155.582	Hypo
NC_019475.2	1992047	1992189	142	8	0.1079	0.5594	-0.4516	-32.1323	Hypo
NC_019469.2	77210403	77210455	52	5	0.1549	0.6063	-0.4514	-15.3654	Hypo
NC_019460.2	7537873	7537939	66	6	0.1455	0.5967	-0.4512	-18.4174	Hypo
NC_019469.2	73184029	73184167	138	15	0.1723	0.6233	-0.451	-68.5401	Hypo
NC_019465.2	87446253	87446353	100	8	0.1364	0.5872	-0.4508	-28.623	Hypo
NC_019481.2	1869422	1869549	127	14	0.2149	0.6656	-0.4506	-68.0224	Hypo
NC_019460.2	5403909	5404081	172	19	0.2184	0.669	-0.4506	-97.7257	Hypo
NC_019470.2	53906344	53906443	99	6	0.1439	0.5942	-0.4503	-18.4134	Hypo
NC_019462.2	96119299	96119424	125	7	0.1214	0.5714	-0.45	-24.1863	Hypo
NC_019473.2	56352641	56352828	187	14	0.0907	0.5407	-0.45	-70.5507	Hypo
NC_019460.2	222930994	222931110	116	9	0.2398	0.6896	-0.4498	-30.3512	Hypo
NC_019470.2	72753307	72753389	82	10	0.1912	0.6408	-0.4497	-37.1935	Hypo
NC_019480.2	61894791	61895117	326	22	0.1288	0.5785	-0.4497	-123.095	Hypo
NC_019468.2	40915905	40915958	53	7	0.2267	0.676	-0.4492	-28.835	Hypo
NC_019471.2	21972193	21972325	132	7	0.0636	0.5126	-0.449	-33.5843	Hypo
NC_019469.2	351100	355349	4249	13	0.1425	0.5912	-0.4486	-58.9264	Hypo
NC_019482.2	44751554	44751666	112	10	0.1643	0.6128	-0.4485	-54.1808	Hypo
NC_019472.2	29853040	29853092	52	4	0.1255	0.574	-0.4485	-12.0012	Hypo
NC_019479.2	49429587	49429688	101	11	0.116	0.564	-0.4481	-53.7463	Hypo
NC_019479.2	19958743	19958830	87	7	0.3008	0.7488	-0.448	-23.6317	Hypo
NC_019481.2	40470429	40470484	55	4	0.0739	0.5219	-0.448	-20.2029	Hypo
NC_019467.2	15859052	15859224	172	14	0.1061	0.5541	-0.448	-75.1819	Hypo
NC_019459.2	1611097	1611284	187	12	0.116	0.5639	-0.4479	-55.1949	Hypo
NC_019463.2	115517726	115517999	273	10	0.1818	0.6295	-0.4477	-36.9488	Hypo
NC_019480.2	42411010	42411066	56	7	0.1315	0.5792	-0.4477	-24.9553	Hypo
NC_019465.2	88709732	88709838	106	9	0.0964	0.5439	-0.4476	-33.9421	Hypo
NC_019480.2	41996782	41996934	152	18	0.1856	0.6332	-0.4476	-86.8938	Hypo
NC_019469.2	25810943	25811034	91	6	0.1333	0.5809	-0.4475	-20.9411	Hypo
NC_019479.2	35571547	35571638	91	4	0.0848	0.5323	-0.4475	-14.9136	Hypo
NC_019468.2	49624283	49624389	106	8	0.1085	0.5559	-0.4474	-32.8419	Hypo
NC_019482.2	27005525	27005657	132	11	0.1064	0.5537	-0.4473	-52.5734	Hypo
NC_019468.2	56817922	56818009	87	6	0.157	0.6043	-0.4473	-21.4833	Hypo
NC_019465.2	88747301	88747523	222	10	0.0848	0.5319	-0.4471	-40.3953	Hypo
NC_019466.2	25319509	25319635	126	10	0.1554	0.6024	-0.4471	-36.8245	Hypo
NC_019471.2	13463007	13463127	120	20	0.2423	0.6892	-0.4469	-105.965	Hypo
NC_019477.2	14834924	14835072	148	9	0.141	0.5879	-0.4469	-31.8326	Hypo
NC_019474.2	67097174	67097235	61	11	0.1928	0.6396	-0.4467	-47.1529	Hypo
NC_019473.2	8007716	8007830	114	11	0.1238	0.5705	-0.4467	-43.4993	Hypo
NC_019476.2	53953784	53953932	148	13	0.2352	0.6816	-0.4464	-62.6201	Hypo
NC_019468.2	36225398	36225543	145	10	0.0948	0.5411	-0.4463	-40.234	Hypo
NC_019481.2	33226354	33226457	103	6	0.143	0.5893	-0.4462	-22.1879	Hypo
NC_019459.2	31895186	31895330	144	14	0.2125	0.6588	-0.4462	-59.4234	Hypo
NC_019479.2	12829237	12829293	56	4	0.0642	0.5103	-0.446	-19.7423	Hypo
NC_019483.2	5732667	5732763	96	6	0.1352	0.5809	-0.4457	-23.0737	Hypo
NC_019469.2	18213368	18213454	86	7	0.0671	0.5126	-0.4455	-29.5181	Hypo
NC_019468.2	22689016	22689186	170	15	0.1711	0.6163	-0.4452	-66.4989	Hypo
NC_019479.2	46345010	46345270	260	16	0.1095	0.5544	-0.4449	-91.7378	Hypo
NC_019482.2	45005696	45005787	91	11	0.1377	0.5825	-0.4448	-44.5695	Hypo
NC_019471.2	60922791	60922884	93	12	0.1646	0.6089	-0.4443	-47.8524	Hypo
NC_019475.2	63266948	63267040	92	6	0.1725	0.6168	-0.4443	-20.6754	Hypo
NC_019464.2	82534031	82534279	248	19	0.1062	0.5503	-0.4442	-103.649	Hypo
NC_019470.2	78328166	78328319	153	14	0.0989	0.5429	-0.444	-68.6995	Hypo
NC_019465.2	16505548	16505646	98	7	0.1117	0.5557	-0.444	-25.0294	Hypo
NC_019476.2	42753009	42753156	147	10	0.143	0.5868	-0.4438	-41.7159	Hypo
NC_019479.2	50320606	50320725	119	17	0.1327	0.5764	-0.4436	-83.9556	Hypo
NC_019462.2	5500344	5500428	84	14	0.2064	0.65	-0.4436	-58.0993	Hypo
NC_019462.2	13436225	13436351	126	10	0.1637	0.6072	-0.4435	-38.0038	Hypo
NC_019466.2	18976119	18976197	78	4	0.2024	0.6458	-0.4434	-15.6618	Hypo
NC_019470.2	75298638	75298725	87	4	0.1693	0.6126	-0.4433	-14.0902	Hypo
NC_019468.2	50344714	50344857	143	14	0.1366	0.5798	-0.4432	-60.2632	Hypo
NC_019468.2	13152124	13152257	133	11	0.2605	0.7037	-0.4432	-53.0721	Hypo
NC_019475.2	58893610	58893960	350	15	0.1196	0.5626	-0.4431	-72.5069	Hypo
NC_019459.2	21525429	21525748	319	10	0.1033	0.5464	-0.4431	-48.1071	Hypo
NC_019470.2	57703238	57703365	127	11	0.1136	0.5566	-0.443	-49.0949	Hypo
NC_019465.2	75961852	75962104	252	7	0.0711	0.5139	-0.4428	-32.8915	Hypo
NC_019468.2	13707247	13707301	54	6	0.3869	0.8296	-0.4428	-22.3487	Hypo
NC_019480.2	3059890	3060253	363	20	0.1137	0.5566	-0.4428	-100.996	Hypo
NC_019464.2	33462221	33464702	2481	16	0.105	0.5477	-0.4427	-68.1365	Hypo
NC_019476.2	60120921	60121024	103	11	0.1772	0.6197	-0.4425	-42.7131	Hypo
NC_019460.2	150411312	150411370	58	5	0.1542	0.5967	-0.4424	-15.0231	Hypo
NC_019472.2	73337381	73337443	62	6	0.0978	0.5402	-0.4423	-21.8297	Hypo
NC_019484.2	1459051	1459139	88	6	0.0803	0.5223	-0.4421	-24.6085	Hypo
NC_019459.2	240166495	240166547	52	4	0.132	0.5741	-0.4421	-12.8825	Hypo
NC_019476.2	17508044	17508153	109	14	0.211	0.6526	-0.4417	-64.8532	Hypo
NC_019460.2	96203449	96203545	96	7	0.155	0.5965	-0.4416	-25.1119	Hypo
NC_019467.2	85473319	85473454	135	23	0.1698	0.6113	-0.4415	-124.023	Hypo
NC_019464.2	97865740	97865942	202	31	0.2295	0.6708	-0.4413	-191.167	Hypo
NC_019459.2	186757882	186758191	309	21	0.2397	0.681	-0.4413	-106.379	Hypo
NC_019467.2	34826449	34826688	239	26	0.1744	0.6153	-0.4408	-147.094	Hypo
NC_019467.2	25938891	25939193	302	21	0.1707	0.6114	-0.4407	-109.291	Hypo
NC_019468.2	31852994	31853069	75	7	0.1254	0.5655	-0.4401	-24.0336	Hypo
NC_019470.2	57217710	57217766	56	5	0.2681	0.708	-0.4399	-15.5465	Hypo
NC_019478.2	44556117	44556297	180	19	0.1274	0.5672	-0.4399	-109.401	Hypo
NC_019461.2	76988553	76988665	112	13	0.2772	0.7169	-0.4397	-61.0482	Hypo
NC_019460.2	161939718	161939955	237	18	0.1111	0.5507	-0.4396	-104.61	Hypo
NC_019465.2	2320625	2320713	88	5	0.0787	0.5181	-0.4395	-17.4883	Hypo
NC_019479.2	50769548	50769729	181	16	0.1138	0.5532	-0.4394	-80.427	Hypo
NC_019478.2	49073989	49074128	139	12	0.1931	0.6323	-0.4393	-55.4667	Hypo
NC_019460.2	215734917	215735058	141	12	0.1861	0.6254	-0.4393	-45.9844	Hypo
NC_019459.2	115773819	115773907	88	12	0.2155	0.6543	-0.4388	-45.0363	Hypo
NC_019476.2	50173875	50174089	214	13	0.1761	0.6146	-0.4384	-52.974	Hypo
NC_019460.2	186412865	186412983	118	14	0.176	0.6142	-0.4382	-63.3025	Hypo
NC_019460.2	9207733	9207857	124	10	0.1499	0.5882	-0.4382	-40.8463	Hypo
NC_019465.2	90275537	90275645	108	13	0.1316	0.5697	-0.4381	-55.1914	Hypo
NC_019473.2	3712052	3712227	175	11	0.2019	0.64	-0.4381	-44.2212	Hypo
NC_019471.2	50876475	50876580	105	14	0.13	0.5679	-0.4379	-64.183	Hypo
NC_019471.2	20645983	20646044	61	5	0.133	0.571	-0.4379	-18.7463	Hypo
NC_019464.2	89616925	89616981	56	8	0.1492	0.5867	-0.4375	-27.3987	Hypo
NC_019460.2	223769366	223769885	519	24	0.0872	0.5247	-0.4375	-167.408	Hypo
NC_019460.2	81477737	81477817	80	5	0.0988	0.5363	-0.4375	-18.4786	Hypo
NC_019474.2	70921962	70922206	244	13	0.2198	0.6572	-0.4374	-57.5246	Hypo
NC_019476.2	56125740	56125977	237	10	0.2656	0.7027	-0.4371	-42.44	Hypo
NC_019465.2	16332972	16333889	917	45	0.1989	0.635	-0.4361	-277.658	Hypo
NC_019459.2	171573899	171574053	154	7	0.3045	0.7404	-0.4359	-21.2927	Hypo
NC_019466.2	78358261	78358323	62	4	0.0791	0.515	-0.4358	-15.8098	Hypo
NC_019476.2	54301319	54301454	135	9	0.1745	0.61	-0.4355	-36.1453	Hypo
NC_019479.2	47007244	47007325	81	10	0.1436	0.5787	-0.4351	-38.9283	Hypo
NC_019464.2	54918659	54918719	60	6	0.1371	0.5721	-0.435	-20.1933	Hypo
NC_019471.2	45649743	45649846	103	13	0.1163	0.5502	-0.4339	-55.848	Hypo
NC_019472.2	49636866	49636940	74	14	0.1768	0.6107	-0.4339	-57.3777	Hypo
NC_019469.2	79002559	79002851	292	20	0.0812	0.515	-0.4338	-114.328	Hypo
NC_019475.2	15740655	15740841	186	35	0.2136	0.6475	-0.4338	-222.213	Hypo
NC_019468.2	61893779	61893911	132	13	0.1926	0.6264	-0.4337	-54.7329	Hypo
NC_019474.2	65940308	65940377	69	5	0.2281	0.6616	-0.4335	-18.1403	Hypo
NC_019475.2	67013368	67013498	130	11	0.1605	0.5939	-0.4334	-41.7674	Hypo
NC_019483.2	42376977	42377031	54	8	0.1253	0.5585	-0.4332	-31.0417	Hypo
NC_019460.2	223601960	223602180	220	23	0.2312	0.6641	-0.4329	-120.448	Hypo
NC_019476.2	49412888	49413029	141	11	0.2117	0.6446	-0.4329	-40.2188	Hypo
NC_019475.2	16027851	16027982	131	11	0.1332	0.5658	-0.4325	-45.9611	Hypo
NC_019479.2	47657021	47659177	2156	15	0.1404	0.5727	-0.4322	-63.8481	Hypo
NC_019479.2	48804431	48804527	96	10	0.1436	0.5753	-0.4317	-37.2185	Hypo
NC_019479.2	50343369	50343448	79	7	0.1436	0.5753	-0.4317	-25.7627	Hypo
NC_019480.2	60538190	60538405	215	8	0.1095	0.5411	-0.4317	-30.3333	Hypo
NC_019468.2	55158006	55158079	73	9	0.1551	0.5867	-0.4316	-31.718	Hypo
NC_019461.2	94125621	94125709	88	7	0.1759	0.6074	-0.4314	-25.2148	Hypo
NC_019473.2	70243149	70243221	72	7	0.063	0.4943	-0.4313	-28.5085	Hypo
NC_019479.2	32621063	32621211	148	16	0.0962	0.5272	-0.431	-87.9661	Hypo
NC_019477.2	11044799	11044896	97	13	0.0996	0.5307	-0.431	-62.6156	Hypo
NC_019465.2	29289097	29289246	149	7	0.1591	0.5901	-0.4309	-26.7464	Hypo
NC_019468.2	20088585	20088655	70	6	0.1254	0.5563	-0.4309	-19.6588	Hypo
NC_019458.2	262248906	262249010	104	15	0.225	0.6555	-0.4305	-54.4725	Hypo
NC_019465.2	90282330	90282408	78	6	0.076	0.5065	-0.4305	-21.831	Hypo
NC_019476.2	32783639	32783697	58	8	0.1905	0.6206	-0.4301	-34.3804	Hypo
NC_019483.2	13472560	13472650	90	12	0.2092	0.6389	-0.4297	-44.411	Hypo
NC_019460.2	222100126	222100294	168	13	0.1389	0.5678	-0.4289	-58.3384	Hypo
NC_019475.2	26600088	26600284	196	10	0.1468	0.5755	-0.4287	-39.8305	Hypo
NC_019464.2	11785089	11785211	122	6	0.0853	0.514	-0.4286	-21.5034	Hypo
NC_019480.2	30753278	30753378	100	11	0.2253	0.6537	-0.4284	-42.3206	Hypo
NC_019460.2	1981488	1981614	126	10	0.2168	0.6452	-0.4284	-38.8848	Hypo
NC_019465.2	78449514	78449667	153	11	0.1887	0.617	-0.4283	-39.7783	Hypo
NC_019461.2	118571594	118571737	143	19	0.2056	0.6336	-0.428	-95.4847	Hypo
NC_019462.2	9765101	9765345	244	14	0.1364	0.5643	-0.4279	-61.0978	Hypo
NC_019459.2	1173526	1173721	195	31	0.1196	0.5474	-0.4278	-202.171	Hypo
NC_019461.2	117123206	117123280	74	7	0.2119	0.6388	-0.4269	-30.1601	Hypo
NC_019468.2	47449337	47449440	103	10	0.1506	0.5772	-0.4266	-35.4959	Hypo
NC_019474.2	46451567	46451628	61	5	0.0998	0.5262	-0.4264	-25.101	Hypo
NC_019480.2	33072299	33072500	201	16	0.1107	0.5371	-0.4264	-79.5689	Hypo
NC_019469.2	70978213	70978438	225	25	0.1569	0.5831	-0.4262	-150.231	Hypo
NC_019477.2	50431629	50431709	80	4	0.1341	0.5602	-0.4261	-13.3747	Hypo
NC_019481.2	25868253	25868435	182	14	0.0926	0.5185	-0.426	-72.4171	Hypo
NC_019479.2	46754909	46756511	1602	19	0.1006	0.5263	-0.4257	-84.2703	Hypo
NC_019480.2	2093155	2093293	138	9	0.1259	0.5516	-0.4257	-34.4234	Hypo
NC_019482.2	2843312	2843459	147	8	0.1671	0.5927	-0.4256	-33.0313	Hypo
NC_019482.2	43301140	43301258	118	8	0.1383	0.5635	-0.4252	-27.8632	Hypo
NC_019469.2	47815524	47815596	72	7	0.1452	0.5704	-0.4252	-23.0322	Hypo
NC_019483.2	5168282	5168354	72	7	0.125	0.5502	-0.4252	-22.2901	Hypo
NC_019460.2	130575810	130575936	126	7	0.1227	0.5478	-0.4251	-27.881	Hypo
NC_019466.2	79232114	79232220	106	11	0.1352	0.5603	-0.4251	-39.9593	Hypo
NC_019475.2	31699068	31699277	209	10	0.0874	0.5123	-0.425	-45.8003	Hypo
NC_019459.2	29015310	29015470	160	10	0.1742	0.5988	-0.4246	-38.3047	Hypo
NC_019468.2	56735291	56735664	373	23	0.1862	0.6106	-0.4244	-124.206	Hypo
NC_019462.2	16862880	16863075	195	14	0.1128	0.537	-0.4243	-63.4635	Hypo
NC_019460.2	3299782	3299852	70	6	0.1278	0.552	-0.4242	-21.2998	Hypo
NC_019460.2	105410546	105410683	137	13	0.1363	0.5601	-0.4238	-54.8232	Hypo
NC_019468.2	20423701	20423929	228	16	0.2198	0.6435	-0.4237	-67.2519	Hypo
NC_019475.2	5635748	5635859	111	10	0.1623	0.5858	-0.4235	-35.042	Hypo
NC_019480.2	60910625	60911162	537	41	0.108	0.5312	-0.4232	-268.22	Hypo
NC_019464.2	82820736	82820879	143	14	0.1398	0.5628	-0.4231	-69.2119	Hypo
NC_019460.2	6131950	6132114	164	16	0.1272	0.5499	-0.4227	-76.6373	Hypo
NC_019484.2	35855319	35855385	66	5	0.0976	0.5201	-0.4224	-19.7997	Hypo
NC_019460.2	223149799	223150114	315	16	0.1205	0.5428	-0.4223	-80.91	Hypo
NC_019473.2	67750743	67750980	237	9	0.0804	0.5022	-0.4219	-38.4026	Hypo
NC_019460.2	161963201	161963416	215	12	0.096	0.5179	-0.4219	-58.5479	Hypo
NC_019484.2	59869197	59869314	117	7	0.0822	0.5037	-0.4215	-34.1633	Hypo
NC_019464.2	21143301	21143420	119	15	0.1333	0.5546	-0.4213	-66.0193	Hypo
NC_019461.2	111830269	111830368	99	10	0.2137	0.635	-0.4213	-41.276	Hypo
NC_019464.2	6538690	6538742	52	5	0.0991	0.5192	-0.4201	-15.8078	Hypo
NC_019460.2	9557980	9558069	89	9	0.1512	0.5712	-0.4201	-30.9703	Hypo
NC_019474.2	55271512	55271568	56	6	0.1602	0.5803	-0.42	-21.0497	Hypo
NC_019475.2	34122409	34122495	86	8	0.3277	0.7477	-0.42	-26.0539	Hypo
NC_019468.2	60418672	60422036	3364	45	0.1102	0.5301	-0.4198	-229.268	Hypo
NC_019468.2	50267614	50267681	67	9	0.1671	0.5867	-0.4197	-29.748	Hypo
NC_019476.2	56530520	56530721	201	20	0.1369	0.5564	-0.4195	-110.902	Hypo
NC_019460.2	17537911	17538146	235	12	0.0991	0.5182	-0.419	-51.427	Hypo
NC_019460.2	4016523	4016898	375	29	0.1261	0.5444	-0.4183	-175.491	Hypo
NC_019468.2	54518316	54518491	175	20	0.1829	0.601	-0.4181	-97.787	Hypo
NC_019481.2	41011441	41011566	125	12	0.1585	0.5764	-0.4179	-46.1475	Hypo
NC_019483.2	6290373	6290475	102	9	0.1307	0.5485	-0.4178	-31.4745	Hypo
NC_019482.2	5251548	5251716	168	6	0.1041	0.5218	-0.4177	-23.9022	Hypo
NC_019466.2	23679391	23679592	201	13	0.0783	0.4959	-0.4176	-61.5528	Hypo
NC_019477.2	25050862	25051055	193	8	0.1321	0.5496	-0.4175	-28.0659	Hypo
NC_019483.2	1100652	1100717	65	7	0.1887	0.6062	-0.4175	-23.6016	Hypo
NC_019471.2	17822818	17823304	486	8	0.0828	0.5001	-0.4173	-31.357	Hypo
NC_019480.2	58450614	58450875	261	17	0.122	0.5389	-0.417	-85.4195	Hypo
NC_019464.2	15309301	15309386	85	6	0.234	0.6508	-0.4168	-20.4531	Hypo
NC_019462.2	1078888	1078942	54	8	0.1501	0.5668	-0.4167	-30.0474	Hypo
NC_019477.2	47784415	47784545	130	15	0.096	0.5125	-0.4166	-83.1748	Hypo
NC_019460.2	63165193	63165325	132	20	0.0827	0.4992	-0.4165	-131.316	Hypo
NC_019460.2	80831205	80831264	59	12	0.1861	0.6026	-0.4165	-44.9521	Hypo
NC_019467.2	81108855	81109109	254	10	0.1211	0.5373	-0.4162	-39.9076	Hypo
NC_019468.2	32742129	32742229	100	7	0.0912	0.507	-0.4158	-31.4956	Hypo
NC_019460.2	217712340	217712464	124	7	0.0798	0.4956	-0.4157	-28.2619	Hypo
NC_019470.2	81646886	81647170	284	13	0.1634	0.5789	-0.4155	-58.786	Hypo
NC_019469.2	25037451	25037534	83	7	0.0946	0.51	-0.4154	-26.0183	Hypo
NC_019466.2	93267239	93267394	155	12	0.0839	0.4993	-0.4154	-54.3403	Hypo
NC_019471.2	49406220	49406320	100	5	0.0943	0.5096	-0.4153	-17.8491	Hypo
NC_019471.2	33591006	33591067	61	11	0.2824	0.6975	-0.4151	-42.4411	Hypo
NC_019466.2	75382010	75382123	113	8	0.1009	0.5159	-0.415	-30.2255	Hypo
NC_019459.2	240530367	240530477	110	9	0.0991	0.5141	-0.415	-38.3378	Hypo
NC_019468.2	53590582	53590685	103	5	0.1021	0.5168	-0.4148	-20.423	Hypo
NC_019468.2	53590737	53590833	96	4	0.1021	0.5168	-0.4148	-17.8001	Hypo
NC_019475.2	66086725	66087057	332	10	0.0989	0.5136	-0.4147	-44.8888	Hypo
NC_019474.2	31973276	31973364	88	11	0.1587	0.5731	-0.4144	-47.193	Hypo
NC_019464.2	98845401	98845511	110	4	0.0609	0.4752	-0.4143	-13.3325	Hypo
NC_019484.2	18580875	18580937	62	6	0.1422	0.5564	-0.4142	-28.4859	Hypo
NC_019475.2	68183213	68183281	68	4	0.0802	0.4944	-0.4142	-17.9502	Hypo
NC_019460.2	2670944	2671088	144	11	0.1284	0.5422	-0.4139	-53.8335	Hypo
NC_019476.2	54039385	54039547	162	9	0.1583	0.5721	-0.4138	-33.5948	Hypo
NC_019469.2	29954163	29954222	59	5	0.1033	0.517	-0.4137	-17.6196	Hypo
NC_019473.2	18594	18910	316	13	0.1864	0.6002	-0.4137	-57.9094	Hypo
NC_019477.2	11624310	11624410	100	9	0.1582	0.5715	-0.4133	-30.0777	Hypo
NC_019470.2	50666498	50666842	344	10	0.1317	0.5442	-0.4125	-35.0177	Hypo
NC_019460.2	210531036	210531128	92	5	0.1066	0.5189	-0.4124	-18.3133	Hypo
NC_019476.2	60269359	60269457	98	10	0.2185	0.6309	-0.4124	-36.8245	Hypo
NC_019479.2	50362006	50362135	129	11	0.1308	0.5431	-0.4123	-48.5258	Hypo
NC_019470.2	78740427	78740540	113	11	0.1431	0.5554	-0.4123	-39.1942	Hypo
NC_019469.2	77633419	77633579	160	18	0.1908	0.6027	-0.4119	-81.6576	Hypo
NC_019480.2	33556012	33556177	165	14	0.1631	0.5751	-0.4119	-58.2929	Hypo
NC_019478.2	41640280	41640482	202	20	0.1165	0.5282	-0.4117	-108.918	Hypo
NC_019468.2	42660211	42660420	209	9	0.0833	0.4949	-0.4116	-39.4053	Hypo
NC_019476.2	11420919	11421073	154	9	0.2082	0.6197	-0.4115	-28.9983	Hypo
NC_019468.2	60506147	60506373	226	24	0.1317	0.5429	-0.4112	-133.691	Hypo
NC_019482.2	45155790	45155880	90	9	0.1438	0.5549	-0.4111	-30.4683	Hypo
NC_019474.2	60771869	60771974	105	8	0.1269	0.5378	-0.4109	-29.6436	Hypo
NC_019481.2	14616914	14616972	58	4	0.1115	0.5219	-0.4104	-14.8133	Hypo
NC_019459.2	135426862	135426933	71	8	0.1588	0.5692	-0.4104	-27.7234	Hypo
NC_019469.2	73704333	73704385	52	6	0.107	0.517	-0.41	-19.736	Hypo
NC_019479.2	47120796	47120926	130	7	0.0967	0.5067	-0.41	-28.6796	Hypo
NC_019481.2	33232180	33232238	58	6	0.1361	0.5461	-0.41	-24.4391	Hypo
NC_019481.2	32455286	32455425	139	13	0.2538	0.6637	-0.4099	-61.6174	Hypo
NC_019472.2	75297866	75298058	192	20	0.2438	0.6536	-0.4098	-87.1216	Hypo
NC_019468.2	33406130	33406256	126	14	0.1662	0.576	-0.4098	-54.5917	Hypo
NC_019465.2	90060358	90060660	302	20	0.1284	0.5377	-0.4093	-94.9678	Hypo
NC_019466.2	25382862	25383008	146	7	0.1256	0.5349	-0.4093	-25.2017	Hypo
NC_019471.2	55126383	55127096	713	32	0.1163	0.5254	-0.4092	-165.135	Hypo
NC_019463.2	116456076	116456135	59	10	0.2364	0.6455	-0.4091	-33.2127	Hypo
NC_019472.2	74301724	74301783	59	4	0.0999	0.509	-0.4091	-14.0133	Hypo
NC_019483.2	15150148	15150278	130	19	0.2021	0.6103	-0.4082	-87.852	Hypo
NC_019468.2	61123204	61123394	190	13	0.1433	0.5513	-0.408	-50.9385	Hypo
NC_019469.2	77663324	77663766	442	28	0.117	0.5248	-0.4078	-139.839	Hypo
NC_019472.2	79034509	79034782	273	12	0.0973	0.5049	-0.4076	-52.9964	Hypo
NC_019472.2	23360836	23363333	2497	4	0.1215	0.5285	-0.407	-17.0564	Hypo
NC_019481.2	37472584	37472686	102	11	0.1869	0.5938	-0.4069	-43.2262	Hypo
NC_019459.2	1698268	1698353	85	10	0.1604	0.5673	-0.4068	-33.4278	Hypo
NC_019476.2	43138430	43138599	169	12	0.11	0.5168	-0.4068	-57.2678	Hypo
NC_019459.2	241290081	241290164	83	10	0.193	0.5996	-0.4066	-33.6092	Hypo
NC_019461.2	114271148	114271347	199	17	0.0869	0.4931	-0.4062	-102.968	Hypo
NC_019468.2	41687230	41687354	124	16	0.1672	0.5733	-0.4061	-67.6029	Hypo
NC_019467.2	19670505	19670751	246	23	0.1761	0.5822	-0.406	-127.309	Hypo
NC_019468.2	61925479	61925575	96	13	0.1028	0.5087	-0.4059	-56.1474	Hypo
NC_019464.2	85172812	85172900	88	9	0.0674	0.4731	-0.4058	-53.0104	Hypo
NC_019481.2	40398305	40398437	132	11	0.1702	0.576	-0.4058	-40.2599	Hypo
NC_019470.2	41580452	41580522	70	6	0.0955	0.5012	-0.4057	-21.2532	Hypo
NC_019462.2	5676189	5676395	206	24	0.1565	0.5622	-0.4057	-129.958	Hypo
NC_019460.2	135977868	135978028	160	14	0.1974	0.6031	-0.4057	-55.9394	Hypo
NC_019466.2	20175224	20175412	188	15	0.1192	0.5249	-0.4057	-69.9861	Hypo
NC_019475.2	56555679	56555773	94	10	0.1859	0.5913	-0.4054	-37.4079	Hypo
NC_019462.2	103719336	103719437	101	9	0.1623	0.5675	-0.4052	-31.7195	Hypo
NC_019467.2	83646071	83646610	539	12	0.1631	0.5683	-0.4052	-46.3305	Hypo
NC_019462.2	36312032	36312083	51	4	0.1056	0.5107	-0.4051	-13.011	Hypo
NC_019484.2	120053954	120054141	187	26	0.1625	0.5674	-0.405	-155.086	Hypo
NC_019475.2	64565537	64565683	146	22	0.2147	0.6193	-0.4046	-108.024	Hypo
NC_019479.2	17644050	17644129	79	7	0.1287	0.5328	-0.4041	-28.0973	Hypo
NC_019475.2	65055387	65055440	53	9	0.1819	0.5858	-0.4039	-29.1778	Hypo
NC_019472.2	74565107	74565162	55	6	0.0955	0.4992	-0.4037	-22.2084	Hypo
NC_019465.2	89527630	89527767	137	15	0.1729	0.5765	-0.4036	-63.1928	Hypo
NC_019478.2	39375143	39375205	62	6	0.1569	0.5605	-0.4036	-23.7124	Hypo
NC_019474.2	72005060	72005214	154	15	0.1684	0.5716	-0.4033	-62.0358	Hypo
NC_019467.2	86307538	86307701	163	14	0.1475	0.5508	-0.4033	-53.7311	Hypo
NC_019460.2	7524668	7524761	93	5	0.2206	0.6235	-0.403	-16.6915	Hypo
NC_019458.2	111332484	111332564	80	8	0.1298	0.5326	-0.4027	-31.7335	Hypo
NC_019479.2	20378975	20379070	95	9	0.1366	0.5393	-0.4027	-29.9254	Hypo
NC_019460.2	7401760	7401811	51	5	0.3194	0.7218	-0.4024	-16.5795	Hypo
NC_019477.2	49945777	49945828	51	8	0.1699	0.5715	-0.4016	-25.9438	Hypo
NC_019470.2	82605083	82605184	101	8	0.0894	0.4909	-0.4015	-33.0198	Hypo
NC_019461.2	47986299	47986435	136	8	0.1043	0.5052	-0.4009	-30.5516	Hypo
NC_019466.2	15627554	15627680	126	8	0.0847	0.4855	-0.4009	-28.9274	Hypo
NC_019468.2	19758912	19759158	246	21	0.082	0.4828	-0.4008	-120.135	Hypo
NC_019473.2	11438110	11438185	75	8	0.2436	0.6441	-0.4006	-27.7119	Hypo
NC_019479.2	35590492	35590561	69	7	0.1287	0.5291	-0.4004	-28.8793	Hypo
NC_019458.2	270406231	270406363	132	10	0.1279	0.5282	-0.4003	-35.3468	Hypo
NC_019469.2	68660266	68660330	64	4	0.1119	0.5122	-0.4003	-13.8284	Hypo
NC_019479.2	49488865	49488918	53	5	0.1098	0.5101	-0.4003	-16.4559	Hypo
NC_019481.2	520016	520207	191	20	0.0938	0.4938	-0.4001	-107.665	Hypo
NC_019472.2	80131649	80131726	77	8	0.0756	0.4757	-0.4001	-30.2317	Hypo
NC_019482.2	27379864	27379920	56	4	0.0726	0.4726	-0.4	-15.0276	Hypo
NC_019479.2	50035905	50036001	96	12	0.137	0.537	-0.3999	-50.8314	Hypo
NC_019471.2	38286734	38286785	51	5	0.0896	0.4894	-0.3997	-19.7523	Hypo
NC_019478.2	48627624	48627724	100	6	0.0933	0.493	-0.3997	-25.909	Hypo
NC_019471.2	29989743	29989893	150	15	0.1281	0.5276	-0.3995	-70.375	Hypo
NC_019473.2	15235821	15235935	114	15	0.1652	0.5645	-0.3993	-70.5916	Hypo
NC_019469.2	77256309	77260375	4066	13	0.1983	0.5975	-0.3992	-44.7405	Hypo
NC_019461.2	118971927	118972048	121	8	0.1176	0.5168	-0.3992	-31.8531	Hypo
NC_019480.2	61015931	61016193	262	12	0.2175	0.6167	-0.3992	-46.8987	Hypo
NC_019468.2	25235358	25236221	863	63	0.1287	0.5278	-0.3991	-408.797	Hypo
NC_019467.2	73557267	73557464	197	19	0.1357	0.5345	-0.3988	-104.255	Hypo
NC_019460.2	216654704	216654799	95	5	0.2775	0.6761	-0.3987	-20.763	Hypo
NC_019459.2	218907520	218907745	225	20	0.0853	0.4837	-0.3984	-117.996	Hypo
NC_019471.2	11212506	11212844	338	34	0.2379	0.6362	-0.3983	-198.082	Hypo
NC_019460.2	40302991	40303067	76	4	0.1066	0.5047	-0.3981	-14.548	Hypo
NC_019479.2	50403480	50403774	294	29	0.0559	0.4538	-0.398	-226.971	Hypo
NC_019475.2	33277336	33277419	83	8	0.1047	0.5025	-0.3979	-30.4294	Hypo
NC_019462.2	104072831	104072992	161	11	0.0879	0.4857	-0.3978	-52.6528	Hypo
NC_019472.2	30657123	30657457	334	16	0.1067	0.5043	-0.3977	-73.9321	Hypo
NC_019468.2	26582375	26582435	60	10	0.1391	0.5365	-0.3974	-42.3721	Hypo
NC_019483.2	5967736	5968086	350	19	0.0869	0.4841	-0.3972	-116.045	Hypo
NC_019467.2	86237787	86237915	128	10	0.1742	0.5709	-0.3968	-44.2138	Hypo
NC_019468.2	54992611	54992810	199	23	0.2176	0.6138	-0.3962	-105.785	Hypo
NC_019476.2	60095622	60095698	76	10	0.1153	0.5116	-0.3962	-34.6968	Hypo
NC_019468.2	33897337	33897550	213	12	0.1166	0.5125	-0.3959	-49.01	Hypo
NC_019470.2	75510805	75510933	128	21	0.2994	0.6949	-0.3955	-91.4956	Hypo
NC_019475.2	66532204	66532265	61	4	0.2975	0.6928	-0.3953	-17.7662	Hypo
NC_019480.2	54765816	54765887	71	6	0.0935	0.4882	-0.3947	-24.4148	Hypo
NC_019484.2	65542074	65542329	255	28	0.1079	0.5025	-0.3946	-275.337	Hypo
NC_019483.2	42386253	42386395	142	15	0.0841	0.4787	-0.3946	-63.1726	Hypo
NC_019466.2	60480518	60480673	155	11	0.0664	0.4609	-0.3945	-50.4257	Hypo
NC_019482.2	44228379	44228442	63	8	0.0637	0.4581	-0.3943	-33.9792	Hypo
NC_019477.2	49355086	49355170	84	4	0.124	0.5183	-0.3943	-16.6296	Hypo
NC_019482.2	43958769	43958859	90	6	0.1012	0.4952	-0.394	-22.7704	Hypo
NC_019461.2	112973477	112973730	253	11	0.1106	0.5036	-0.393	-53.8148	Hypo
NC_019473.2	70308858	70308939	81	8	0.1267	0.5194	-0.3926	-32.3532	Hypo
NC_019483.2	40457006	40457067	61	10	0.2036	0.596	-0.3924	-33.8528	Hypo
NC_019460.2	207327231	207327325	94	8	0.1699	0.562	-0.3921	-31.0761	Hypo
NC_019476.2	11530394	11530635	241	11	0.2955	0.6875	-0.3921	-45.5461	Hypo
NC_019460.2	222365659	222365972	313	34	0.16	0.552	-0.3919	-205.968	Hypo
NC_019467.2	82039464	82039544	80	6	0.098	0.4898	-0.3918	-28.1955	Hypo
NC_019478.2	41767221	41767475	254	9	0.1487	0.5403	-0.3916	-36.378	Hypo
NC_019479.2	50201205	50201342	137	18	0.2611	0.6526	-0.3915	-84.6146	Hypo
NC_019462.2	43409509	43409683	174	12	0.185	0.5762	-0.3912	-47.3654	Hypo
NC_019476.2	42864190	42864288	98	10	0.3578	0.749	-0.3912	-41.3014	Hypo
NC_019476.2	56037077	56037158	81	7	0.2979	0.689	-0.3911	-28.6461	Hypo
NC_019475.2	68345734	68345875	141	14	0.1715	0.5625	-0.391	-64.806	Hypo
NC_019482.2	24762259	24762434	175	21	0.289	0.6796	-0.3906	-90.7595	Hypo
NC_019474.2	70922296	70922373	77	10	0.3274	0.7174	-0.39	-43.3615	Hypo
NC_019460.2	3855282	3855504	222	22	0.2478	0.6378	-0.39	-107.336	Hypo
NC_019474.2	17069254	17069398	144	9	0.1533	0.543	-0.3897	-31.5145	Hypo
NC_019467.2	78366024	78366091	67	7	0.2985	0.6882	-0.3897	-22.9453	Hypo
NC_019461.2	112971021	112971114	93	4	0.1099	0.4994	-0.3896	-16.4001	Hypo
NC_019473.2	42222670	42222756	86	5	0.1066	0.496	-0.3894	-22.8874	Hypo
NC_019460.2	218950321	218950401	80	8	0.1372	0.5265	-0.3893	-34.4192	Hypo
NC_019481.2	38053229	38053293	64	6	0.1469	0.5361	-0.3892	-21.8671	Hypo
NC_019484.2	35496791	35497029	238	30	0.1797	0.5686	-0.389	-188.787	Hypo
NC_019459.2	136873831	136873922	91	13	0.196	0.5844	-0.3885	-45.8213	Hypo
NC_019466.2	83192844	83192920	76	12	0.0787	0.4671	-0.3884	-50.8075	Hypo
NC_019468.2	26979383	26979633	250	17	0.0872	0.475	-0.3878	-89.6857	Hypo
NC_019460.2	221884544	221885247	703	19	0.0941	0.4817	-0.3876	-71.8713	Hypo
NC_019459.2	235082844	235082908	64	11	0.2015	0.5884	-0.387	-38.8593	Hypo
NC_019481.2	39089031	39089106	75	5	0.14	0.5268	-0.3868	-16.0317	Hypo
NC_019460.2	4205327	4205388	61	6	0.0783	0.4652	-0.3868	-25.2698	Hypo
NC_019468.2	42662803	42663102	299	29	0.0818	0.4684	-0.3866	-199.056	Hypo
NC_019468.2	34184645	34184845	200	19	0.4003	0.7869	-0.3866	-83.8306	Hypo
NC_019460.2	69179437	69179634	197	19	0.2209	0.6075	-0.3866	-79.0131	Hypo
NC_019468.2	60135162	60135257	95	12	0.1873	0.5729	-0.3857	-42.6752	Hypo
NC_019459.2	7534304	7534643	339	30	0.1406	0.5262	-0.3856	-175.791	Hypo
NC_019479.2	18108225	18108285	60	5	0.1287	0.5138	-0.3851	-17.5178	Hypo
NC_019475.2	56193184	56193266	82	6	0.1258	0.5107	-0.3849	-23.4202	Hypo
NC_019473.2	62347528	62347743	215	21	0.0893	0.4742	-0.3848	-101.025	Hypo
NC_019469.2	77865836	77866067	231	12	0.1156	0.5001	-0.3845	-58.6588	Hypo
NC_019481.2	10380651	10380734	83	11	0.2073	0.5916	-0.3843	-46.8801	Hypo
NC_019468.2	60374618	60374766	148	15	0.0883	0.4726	-0.3843	-79.7877	Hypo
NC_019468.2	54094909	54095000	91	9	0.1695	0.5536	-0.384	-33.5394	Hypo
NC_019480.2	38167356	38167499	143	20	0.1136	0.4971	-0.3836	-106.385	Hypo
NC_019476.2	59552297	59552394	97	11	0.2048	0.5884	-0.3836	-51.2813	Hypo
NC_019481.2	914234	914489	255	31	0.1446	0.5278	-0.3832	-190.815	Hypo
NC_019476.2	59695673	59695730	57	5	0.2418	0.6249	-0.3831	-18.4304	Hypo
NC_019462.2	43008252	43008338	86	6	0.1279	0.5107	-0.3828	-23.5175	Hypo
NC_019470.2	50154309	50154468	159	14	0.1815	0.5641	-0.3827	-60.2432	Hypo
NC_019481.2	41189468	41189656	188	32	0.1923	0.5747	-0.3824	-188.613	Hypo
NC_019467.2	21692296	21692402	106	14	0.1588	0.5408	-0.382	-56.4427	Hypo
NC_019474.2	16477272	16477397	125	9	0.1163	0.498	-0.3816	-33.887	Hypo
NC_019480.2	52509491	52509635	144	7	0.1024	0.4838	-0.3814	-29.4837	Hypo
NC_019460.2	17690313	17690370	57	7	0.1822	0.5636	-0.3813	-26.4412	Hypo
NC_019470.2	11980339	11980424	85	8	0.1623	0.5433	-0.381	-25.3326	Hypo
NC_019478.2	49182317	49182482	165	21	0.2522	0.6331	-0.3809	-85.4887	Hypo
NC_019468.2	61151055	61151172	117	9	0.1926	0.5729	-0.3803	-35.9446	Hypo
NC_019480.2	700402	700589	187	11	0.1276	0.5075	-0.3799	-45.0061	Hypo
NC_019471.2	47219326	47219634	308	22	0.1424	0.522	-0.3796	-115.963	Hypo
NC_019471.2	48453985	48454124	139	17	0.1809	0.5605	-0.3796	-77.1945	Hypo
NC_019460.2	209512979	209513215	236	25	0.1059	0.4855	-0.3796	-145.209	Hypo
NC_019467.2	82223648	82223796	148	21	0.2235	0.603	-0.3795	-84.8842	Hypo
NC_019460.2	93226219	93226376	157	10	0.2781	0.6566	-0.3786	-38.1031	Hypo
NC_019482.2	45016776	45018598	1822	20	0.081	0.4594	-0.3783	-89.6624	Hypo
NC_019475.2	32111452	32111510	58	6	0.1167	0.4948	-0.3782	-26.3856	Hypo
NC_019475.2	66401879	66402038	159	10	0.11	0.4882	-0.3781	-49.183	Hypo
NC_019469.2	69871209	69871341	132	7	0.1291	0.5068	-0.3777	-33.4783	Hypo
NC_019472.2	78021281	78021434	153	12	0.1315	0.5092	-0.3777	-44.2679	Hypo
NC_019466.2	93493015	93493113	98	15	0.1374	0.5149	-0.3775	-56.2332	Hypo
NC_019483.2	36620027	36620086	59	12	0.1007	0.4778	-0.3772	-48.3189	Hypo
NC_019460.2	11406355	11406411	56	4	0.0973	0.4746	-0.3772	-15.9746	Hypo
NC_019459.2	108517856	108518164	308	35	0.116	0.4925	-0.3765	-318.848	Hypo
NC_019477.2	26437103	26437180	77	5	0.0996	0.476	-0.3764	-18.021	Hypo
NC_019466.2	14645355	14645501	146	19	0.1013	0.4777	-0.3764	-94.7508	Hypo
NC_019460.2	10534375	10534432	57	5	0.0885	0.4649	-0.3763	-19.0125	Hypo
NC_019466.2	21012981	21016730	3749	17	0.1253	0.5014	-0.376	-68.6474	Hypo
NC_019475.2	30628540	30628638	98	4	0.3256	0.7015	-0.3759	-15.2302	Hypo
NC_019466.2	20851805	20852026	221	20	0.1148	0.4906	-0.3758	-94.7734	Hypo
NC_019475.2	4553727	4553789	62	9	0.1896	0.5648	-0.3752	-29.872	Hypo
NC_019472.2	46074563	46074783	220	17	0.0646	0.4396	-0.375	-91.7148	Hypo
NC_019460.2	212215919	212216083	164	13	0.1771	0.5521	-0.3749	-51.4599	Hypo
NC_019474.2	51343329	51343442	113	11	0.1514	0.5262	-0.3748	-40.8483	Hypo
NC_019473.2	316421	316487	66	6	0.0991	0.4738	-0.3747	-23.8458	Hypo
NC_019461.2	6651172	6651310	138	9	0.272	0.6464	-0.3744	-33.1677	Hypo
NC_019459.2	219075515	219075587	72	4	0.0964	0.4706	-0.3742	-17.0239	Hypo
NC_019469.2	68275869	68275959	90	15	0.2032	0.5767	-0.3735	-57.3903	Hypo
NC_019480.2	35505497	35505574	77	8	0.1566	0.5299	-0.3733	-28.3371	Hypo
NC_019470.2	45007198	45007282	84	6	0.1042	0.4774	-0.3732	-22.6465	Hypo
NC_019468.2	8228328	8228385	57	4	0.3927	0.7653	-0.3726	-16.9844	Hypo
NC_019462.2	103800465	103800715	250	22	0.3085	0.681	-0.3725	-92.4961	Hypo
NC_019472.2	74786171	74786319	148	17	0.1661	0.5385	-0.3724	-68.4667	Hypo
NC_019471.2	46704265	46704324	59	4	0.1115	0.4838	-0.3723	-15.8023	Hypo
NC_019468.2	36999866	37000156	290	18	0.1089	0.4811	-0.3722	-101.466	Hypo
NC_019471.2	14054899	14055167	268	25	0.169	0.5411	-0.3721	-127.815	Hypo
NC_019466.2	15109988	15110051	63	6	0.095	0.4671	-0.3721	-22.2734	Hypo
NC_019484.2	487750	488005	255	22	0.1757	0.5476	-0.3719	-113.629	Hypo
NC_019469.2	60088839	60088918	79	5	0.2002	0.5719	-0.3718	-19.381	Hypo
NC_019460.2	221477647	221477787	140	13	0.1327	0.5045	-0.3718	-52.5331	Hypo
NC_019474.2	43273112	43273183	71	7	0.1239	0.4955	-0.3715	-26.8652	Hypo
NC_019466.2	14540821	14540997	176	12	0.1486	0.52	-0.3714	-48.7115	Hypo
NC_019467.2	85739758	85739946	188	20	0.1054	0.4767	-0.3714	-91.8174	Hypo
NC_019470.2	63174072	63174151	79	7	0.1179	0.4888	-0.371	-27.2551	Hypo
NC_019472.2	72640213	72640273	60	6	0.1487	0.5197	-0.371	-31.3249	Hypo
NC_019475.2	66903817	66903976	159	14	0.2016	0.5724	-0.3708	-55.2939	Hypo
NC_019468.2	60171069	60171316	247	17	0.1162	0.4865	-0.3703	-77.6294	Hypo
NC_019480.2	6978311	6978581	270	16	0.1131	0.4833	-0.3703	-72.0319	Hypo
NC_019477.2	15809633	15809687	54	6	0.0956	0.4656	-0.3701	-22.8717	Hypo
NC_019459.2	117517873	117517981	108	13	0.1697	0.5398	-0.3701	-53.3313	Hypo
NC_019460.2	222236909	222236967	58	5	0.1446	0.5146	-0.37	-20.8895	Hypo
NC_019484.2	44358808	44359000	192	14	0.1158	0.4857	-0.3699	-109.409	Hypo
NC_019466.2	19866374	19866597	223	11	0.094	0.463	-0.369	-44.4615	Hypo
NC_019461.2	92423824	92423950	126	11	0.1788	0.5473	-0.3685	-45.3196	Hypo
NC_019480.2	61690427	61690504	77	13	0.1514	0.5199	-0.3685	-49.5616	Hypo
NC_019468.2	42652229	42652296	67	8	0.1112	0.4796	-0.3684	-30.1122	Hypo
NC_019461.2	117953220	117953367	147	20	0.195	0.5623	-0.3673	-88.4513	Hypo
NC_019459.2	183106959	183107042	83	10	0.1686	0.5357	-0.3672	-37.885	Hypo
NC_019473.2	71197744	71197889	145	12	0.1656	0.5327	-0.3671	-54.1442	Hypo
NC_019461.2	106307749	106307972	223	19	0.1458	0.5127	-0.367	-91.571	Hypo
NC_019460.2	2157882	2158007	125	19	0.2127	0.5796	-0.3669	-72.216	Hypo
NC_019460.2	222531137	222531190	53	5	0.0904	0.457	-0.3667	-23.5317	Hypo
NC_019467.2	10765188	10765487	299	28	0.1059	0.4726	-0.3667	-160.916	Hypo
NC_019460.2	220118650	220118713	63	6	0.1468	0.5132	-0.3665	-22.535	Hypo
NC_019476.2	57159875	57160039	164	9	0.2932	0.6597	-0.3665	-30.7689	Hypo
NC_019459.2	1034065	1034133	68	4	0.1357	0.5021	-0.3664	-17.6106	Hypo
NC_019471.2	48677117	48677230	113	15	0.2962	0.6624	-0.3662	-52.511	Hypo
NC_019473.2	70834296	70834522	226	12	0.1878	0.5538	-0.366	-51.4163	Hypo
NC_019458.2	89464	89813	349	38	0.175	0.5408	-0.3658	-182.812	Hypo
NC_019468.2	5423562	5423730	168	17	0.1395	0.5051	-0.3656	-72.3656	Hypo
NC_019476.2	57686822	57686964	142	7	0.1501	0.5157	-0.3656	-27.6279	Hypo
NC_019460.2	63288126	63288178	52	10	0.1529	0.5184	-0.3655	-41.4929	Hypo
NC_019460.2	63288004	63288073	69	5	0.1529	0.5184	-0.3655	-20.0522	Hypo
NC_019459.2	200781613	200781705	92	7	0.1744	0.5395	-0.3651	-25.9823	Hypo
NC_019476.2	59549874	59550101	227	26	0.1212	0.4863	-0.3651	-143.285	Hypo
NC_019477.2	40323782	40323933	151	13	0.1726	0.5377	-0.365	-47.7326	Hypo
NC_019477.2	48967513	48967655	142	10	0.1371	0.5021	-0.365	-33.7916	Hypo
NC_019478.2	49186366	49186609	243	24	0.1758	0.5407	-0.3649	-118.362	Hypo
NC_019471.2	49386913	49387071	158	4	0.0634	0.4281	-0.3647	-24.3648	Hypo
NC_019459.2	231193379	231193544	165	19	0.1064	0.4705	-0.3641	-156.894	Hypo
NC_019468.2	55305662	55305743	81	17	0.1508	0.5147	-0.3639	-71.6148	Hypo
NC_019465.2	16337482	16337759	277	14	0.0629	0.4267	-0.3638	-80.8128	Hypo
NC_019460.2	102638955	102639039	84	8	0.1032	0.4666	-0.3634	-32.4962	Hypo
NC_019473.2	71353778	71353864	86	9	0.0885	0.4514	-0.3629	-40.2292	Hypo
NC_019478.2	48349845	48350017	172	20	0.068	0.4302	-0.3622	-99.6945	Hypo
NC_019467.2	84536366	84536494	128	16	0.1761	0.5379	-0.3618	-61.2332	Hypo
NC_019471.2	49396960	49397255	295	14	0.0616	0.4229	-0.3612	-68.827	Hypo
NC_019472.2	34614033	34614108	75	7	0.1049	0.466	-0.3612	-25.6659	Hypo
NC_019459.2	116115316	116115383	67	8	0.1187	0.4791	-0.3604	-33.1024	Hypo
NC_019478.2	48510977	48511105	128	12	0.1676	0.5278	-0.3601	-45.5733	Hypo
NC_019475.2	67043804	67044138	334	30	0.2131	0.5722	-0.3591	-154.131	Hypo
NC_019461.2	115448775	115448899	124	12	0.1272	0.4862	-0.359	-49.0713	Hypo
NC_019468.2	53658550	53658649	99	11	0.2204	0.5792	-0.3588	-42.0608	Hypo
NC_019459.2	239171837	239171931	94	8	0.1164	0.474	-0.3576	-36.8772	Hypo
NC_019484.2	60987172	60987526	354	22	0.2438	0.601	-0.3572	-124.024	Hypo
NC_019477.2	48006737	48007074	337	36	0.1262	0.483	-0.3568	-225.822	Hypo
NC_019474.2	70833529	70833855	326	27	0.1307	0.4873	-0.3566	-129.282	Hypo
NC_019479.2	48027301	48027392	91	9	0.1499	0.5065	-0.3566	-33.8353	Hypo
NC_019473.2	71389759	71389883	124	15	0.0985	0.4545	-0.356	-67.3036	Hypo
NC_019473.2	1165284	1165349	65	5	0.0757	0.4318	-0.356	-25.4131	Hypo
NC_019460.2	61553918	61553990	72	8	0.1351	0.4901	-0.355	-31.766	Hypo
NC_019473.2	70827298	70827570	272	19	0.1104	0.4653	-0.3549	-88.5702	Hypo
NC_019481.2	39042108	39042171	63	5	0.132	0.4869	-0.3549	-19.3897	Hypo
NC_019481.2	17967711	17967852	141	18	0.212	0.5665	-0.3545	-76.5094	Hypo
NC_019484.2	23380696	23380790	94	4	0.2565	0.611	-0.3545	-23.4424	Hypo
NC_019460.2	219174974	219175095	121	20	0.2115	0.5656	-0.3541	-80.5426	Hypo
NC_019471.2	54298997	54299092	95	7	0.1213	0.4752	-0.3539	-28.026	Hypo
NC_019460.2	106487286	106487376	90	5	0.1262	0.4796	-0.3535	-18.2166	Hypo
NC_019461.2	118559840	118560077	237	19	0.3207	0.674	-0.3532	-92.9471	Hypo
NC_019481.2	27488167	27488299	132	21	0.2063	0.5594	-0.3531	-85.9033	Hypo
NC_019462.2	784721	784802	81	8	0.1135	0.466	-0.3525	-28.0941	Hypo
NC_019468.2	55439525	55439945	420	37	0.1294	0.4814	-0.352	-219.625	Hypo
NC_019474.2	43871222	43871275	53	7	0.0906	0.4425	-0.3519	-32.7312	Hypo
NC_019462.2	10577872	10578025	153	10	0.0854	0.4372	-0.3518	-48.274	Hypo
NC_019475.2	32074622	32074693	71	8	0.2458	0.5971	-0.3513	-33.091	Hypo
NC_019473.2	67362125	67362641	516	62	0.0957	0.4459	-0.3502	-447.682	Hypo
NC_019472.2	80279484	80279562	78	5	0.3939	0.7436	-0.3498	-18.9909	Hypo
NC_019466.2	89625709	89625775	66	7	0.0639	0.4132	-0.3493	-31.1007	Hypo
NC_019471.2	35724792	35724850	58	7	0.0949	0.444	-0.3491	-37.6737	Hypo
NC_019484.2	17530887	17530944	57	10	0.07	0.4178	-0.3478	-49.8959	Hypo
NC_019467.2	51938864	51939065	201	10	0.0892	0.437	-0.3478	-48.1118	Hypo
NC_019462.2	41095845	41095951	106	7	0.1311	0.4787	-0.3476	-25.8237	Hypo
NC_019469.2	52627368	52627663	295	21	0.0868	0.4343	-0.3475	-96.7331	Hypo
NC_019478.2	48463299	48463372	73	13	0.1532	0.5005	-0.3473	-57.9789	Hypo
NC_019475.2	64551936	64552002	66	11	0.1177	0.4648	-0.3471	-44.4735	Hypo
NC_019467.2	62726296	62726384	88	8	0.0832	0.4301	-0.3469	-43.8462	Hypo
NC_019458.2	266391006	266391294	288	33	0.1621	0.5084	-0.3463	-145.406	Hypo
NC_019460.2	222531475	222531553	78	7	0.1604	0.5065	-0.3461	-29.7004	Hypo
NC_019484.2	1184144	1184339	195	9	0.0732	0.419	-0.3458	-34.2475	Hypo
NC_019462.2	6461512	6461611	99	9	0.1556	0.4999	-0.3443	-41.8942	Hypo
NC_019460.2	134576938	134577002	64	6	0.1409	0.4847	-0.3439	-24.138	Hypo
NC_019466.2	14615	14809	194	33	0.0804	0.424	-0.3436	-170.779	Hypo
NC_019463.2	22720631	22720835	204	24	0.132	0.4754	-0.3434	-116.577	Hypo
NC_019476.2	60151377	60151462	85	17	0.3952	0.738	-0.3428	-61.555	Hypo
NC_019478.2	46966562	46966622	60	7	0.1149	0.4573	-0.3423	-44.0075	Hypo
NC_019479.2	41216279	41216486	207	25	0.1649	0.5061	-0.3412	-130.494	Hypo
NC_019472.2	45749208	45749383	175	18	0.0908	0.4308	-0.34	-91.0142	Hypo
NC_019476.2	51347116	51347257	141	18	0.1816	0.5211	-0.3395	-72.8203	Hypo
NC_019484.2	13980304	13980421	117	11	0.0955	0.434	-0.3385	-55.5562	Hypo
NC_019468.2	60579429	60579588	159	14	0.1355	0.4741	-0.3385	-55.1555	Hypo
NC_019458.2	252647347	252647585	238	29	0.1141	0.4519	-0.3377	-129.707	Hypo
NC_019472.2	23376514	23376593	79	9	0.0815	0.4189	-0.3373	-36.9045	Hypo
NC_019465.2	89729368	89729450	82	10	0.0942	0.4308	-0.3367	-44.9534	Hypo
NC_019459.2	1114295	1114397	102	11	0.1368	0.4718	-0.335	-50.6022	Hypo
NC_019460.2	60741254	60741317	63	7	0.4571	0.7915	-0.3345	-35.3576	Hypo
NC_019465.2	89365886	89366056	170	16	0.082	0.4157	-0.3336	-86.7827	Hypo
NC_019461.2	425	682	257	26	0.1242	0.4576	-0.3334	-153.152	Hypo
NC_019483.2	1181787	1181997	210	35	0.2158	0.5489	-0.3331	-162.393	Hypo
NC_019462.2	10578138	10578244	106	12	0.0903	0.4221	-0.3318	-70.6761	Hypo
NC_019465.2	63032128	63032213	85	8	0.1849	0.5164	-0.3316	-31.5285	Hypo
NC_019461.2	55894667	55894917	250	27	0.1216	0.4515	-0.3299	-118.896	Hypo
NC_019483.2	1213113	1213165	52	8	0.093	0.4218	-0.3288	-30.1097	Hypo
NC_019462.2	41451463	41453035	1572	13	0.3099	0.6381	-0.3282	-44.2018	Hypo
NC_019461.2	89026930	89027155	225	22	0.0832	0.4109	-0.3278	-95.9421	Hypo
NC_019468.2	58848708	58848785	77	11	0.0905	0.4181	-0.3276	-54.3114	Hypo
NC_019476.2	60361751	60361911	160	14	0.1408	0.4671	-0.3263	-65.0726	Hypo
NC_019462.2	49754847	49755047	200	35	0.0943	0.4204	-0.3261	-208.777	Hypo
NC_019473.2	70432944	70433036	92	7	0.0688	0.3944	-0.3256	-26.7058	Hypo
NC_019465.2	16337296	16337376	80	5	0.0709	0.396	-0.325	-29.166	Hypo
NC_019478.2	37543533	37544111	578	37	0.1543	0.4777	-0.3234	-213.402	Hypo
NC_019462.2	4468348	4468525	177	28	0.0758	0.3978	-0.3221	-144.066	Hypo
NC_019478.2	37539161	37539441	280	23	0.1892	0.5112	-0.322	-127.499	Hypo
NC_019476.2	51262965	51263040	75	9	0.1795	0.5015	-0.322	-49.2213	Hypo
NC_019473.2	30763844	30763992	148	17	0.089	0.4103	-0.3213	-88.2057	Hypo
NC_019466.2	12437	12501	64	6	0.1583	0.479	-0.3207	-29.3495	Hypo
NC_019469.2	48374479	48374543	64	8	0.1352	0.4552	-0.32	-33.6437	Hypo
NC_019460.2	194759311	194759400	89	10	0.0992	0.4191	-0.3198	-47.6234	Hypo
NC_019471.2	61142574	61142653	79	6	0.0951	0.4149	-0.3197	-33.4876	Hypo
NC_019465.2	16332759	16332842	83	6	0.0676	0.3851	-0.3175	-30.4679	Hypo
NC_019459.2	104202796	104202886	90	7	0.1094	0.4267	-0.3173	-32.4981	Hypo
NC_019472.2	14857414	14857504	90	5	0.0765	0.3931	-0.3167	-20.9815	Hypo
NC_019470.2	44229479	44229547	68	7	0.1019	0.4171	-0.3152	-30.6322	Hypo
NC_019462.2	14258168	14258247	79	14	0.0693	0.3835	-0.3142	-93.4464	Hypo
NC_019475.2	66402123	66402178	55	5	0.1295	0.4426	-0.3131	-30.057	Hypo
NC_019462.2	10341615	10341757	142	18	0.1039	0.4167	-0.3128	-124.4	Hypo
NC_019462.2	103832912	103832994	82	14	0.0734	0.3843	-0.3109	-67.6331	Hypo
NC_019475.2	63775070	63775124	54	8	0.1058	0.4165	-0.3107	-43.9408	Hypo
NC_019484.2	134973830	134973895	65	8	0.1326	0.4398	-0.3072	-45.8376	Hypo
NC_019461.2	79092041	79092304	263	34	0.1372	0.4425	-0.3053	-202.707	Hypo
NC_019462.2	10341387	10341466	79	4	0.1334	0.4373	-0.304	-24.2137	Hypo
NC_019471.2	49371020	49371169	149	6	0.08	0.3823	-0.3023	-37.1525	Hypo
NC_019466.2	14885	15018	133	7	0.0539	0.3553	-0.3015	-37.8171	Hypo
NC_019464.2	72211315	72211404	89	9	0.0806	0.3772	-0.2967	-47.7171	Hypo
NC_019480.2	61614466	61614521	55	8	0.0782	0.374	-0.2958	-54.623	Hypo
NC_019464.2	4690754	4691415	661	75	0.06	0.3554	-0.2954	-583.071	Hypo
NC_019478.2	46966693	46966872	179	19	0.1307	0.4238	-0.2931	-101.688	Hypo
NC_019460.2	218057981	218058127	146	18	0.1378	0.4301	-0.2923	-92.3622	Hypo
NC_019484.2	122393873	122394003	130	10	0.0767	0.3672	-0.2905	-72.4718	Hypo
NC_019477.2	50575627	50575698	71	18	0.1196	0.4078	-0.2881	-102.769	Hypo
NC_019471.2	49378640	49378848	208	17	0.1004	0.3824	-0.282	-103.974	Hypo
NC_019461.2	3728640	3728877	237	24	0.138	0.4199	-0.2819	-152.756	Hypo
NC_019484.2	122394085	122394334	249	28	0.0745	0.3475	-0.2731	-212.607	Hypo
NC_019475.2	29333025	29333201	176	20	0.065	0.3365	-0.2714	-135.246	Hypo
NC_019472.2	74050975	74052315	1340	31	0.2347	0.4843	-0.2496	-123.334	Hypo
NC_019460.2	95032248	95034937	2689	11	0.3496	0.597	-0.2473	-14.5402	Hypo
NC_019470.2	42188449	42191338	2889	10	0.3305	0.5499	-0.2194	-13.6885	Hypo
NC_019461.2	117694644	117698802	4158	27	0.2974	0.4901	-0.1927	-57.996	Hypo
NC_019479.2	50707388	50708946	1558	18	0.268	0.4557	-0.1877	-45.2522	Hypo
NC_019468.2	8252512	8253487	975	11	0.3272	0.4835	-0.1563	-16.6852	Hypo
NC_019476.2	11795862	11796281	419	5	0.3603	0.426	-0.0658	-3.1344	Hypo
NC_019476.2	48814907	48815626	719	18	0.3553	0.4203	-0.0651	-12.6036	Hypo
NC_019466.2	14006619	14009280	2661	8	0.36	0.4107	-0.0508	-1.657	Hypo
NC_019478.2	47061552	47064531	2979	8	0.3695	0.4061	-0.0366	-0.3601	Hypo

## Sheet: Morula_VS_Blastocyst.DMR
Chr	Start	End	Length	N_CG	Methyl_C32	Methyl_C64	Diff_methyl	AreaStat	Direction		Chr	Start	End	Length	N_CG	Methyl_C32	Methyl_C64	Diff_methyl	AreaStat	Direction
NC_019461.2	111047363	111047497	134	7	0.09	0.8946	-0.8046	-83.318	Hypo		NC_019474.2	70860074	70862656	2582	13	0.4809	0.457	0.0239	6.0327	Hyper
NC_019479.2	42162294	42162417	123	6	0.0844	0.8548	-0.7704	-56.5115	Hypo		NC_019469.2	78986318	78988315	1997	33	0.4465	0.3696	0.0769	37.843	Hyper
NC_019460.2	35081855	35081994	139	4	0.1071	0.863	-0.7559	-29.0867	Hypo		NC_019460.2	1583873	1587185	3312	8	0.5866	0.4191	0.1675	9.0934	Hyper
NC_019474.2	60999361	60999678	317	6	0.0607	0.8058	-0.7451	-60.4703	Hypo		NC_019469.2	77324965	77327498	2533	15	0.6492	0.366	0.2832	45.3922	Hyper
NC_019467.2	84279995	84280047	52	5	0.0947	0.8286	-0.7339	-35.4928	Hypo		NC_019466.2	13825656	13826033	377	82	0.7291	0.4393	0.2899	636.529	Hyper
NC_019474.2	64308302	64308390	88	4	0.1213	0.8513	-0.73	-25.7477	Hypo		NC_019464.2	4691039	4691132	93	7	0.4348	0.1364	0.2984	41.8183	Hyper
NC_019468.2	49318489	49318578	89	4	0.0975	0.8271	-0.7296	-25.1626	Hypo		NC_019473.2	30763844	30763992	148	16	0.4002	0.0911	0.309	82.5472	Hyper
NC_019478.2	3093099	3093185	86	4	0.1015	0.8286	-0.7271	-23.5608	Hypo		NC_019484.2	24764053	24764193	140	11	0.576	0.2663	0.3098	50.7669	Hyper
NC_019462.2	44505498	44505584	86	4	0.087	0.8114	-0.7243	-25.7719	Hypo		NC_019484.2	24764243	24764339	96	15	0.5697	0.257	0.3127	71.0821	Hyper
NC_019458.2	103567098	103567189	91	4	0.1462	0.8675	-0.7213	-22.6978	Hypo		NC_019473.2	67362294	67362641	347	47	0.4425	0.1264	0.3161	295.425	Hyper
NC_019471.2	24978911	24978984	73	6	0.1578	0.8752	-0.7175	-38.8319	Hypo		NC_019461.2	113310972	113311047	75	7	0.4224	0.0915	0.3309	26.3074	Hyper
NC_019464.2	15752708	15752789	81	4	0.0842	0.8014	-0.7172	-25.5024	Hypo		NC_019460.2	1043571	1043658	87	6	0.463	0.1266	0.3364	26.5919	Hyper
NC_019482.2	115126	115253	127	6	0.0877	0.8012	-0.7136	-41.775	Hypo		NC_019461.2	116396323	116396548	225	19	0.497	0.1577	0.3394	97.8662	Hyper
NC_019470.2	74096021	74096147	126	7	0.0745	0.7875	-0.7129	-53.169	Hypo		NC_019466.2	20175318	20175383	65	9	0.5425	0.1992	0.3433	36.6512	Hyper
NC_019478.2	48639809	48639936	127	5	0.1113	0.8192	-0.7079	-30.1079	Hypo		NC_019461.2	116986190	116986299	109	7	0.4424	0.099	0.3434	31.4986	Hyper
NC_019461.2	114314197	114314295	98	4	0.106	0.8127	-0.7067	-23.6535	Hypo		NC_019460.2	223769705	223769885	180	13	0.4756	0.1279	0.3477	56.9561	Hyper
NC_019476.2	54099347	54099448	101	5	0.126	0.8327	-0.7067	-30.9508	Hypo		NC_019461.2	63854880	63855040	160	17	0.5701	0.2179	0.3522	63.6591	Hyper
NC_019462.2	48237668	48237855	187	5	0.1375	0.8435	-0.706	-32.3853	Hypo		NC_019460.2	1794072	1794163	91	12	0.5525	0.1998	0.3527	47.4153	Hyper
NC_019481.2	41664862	41664936	74	7	0.0832	0.7855	-0.7023	-55.7124	Hypo		NC_019467.2	85452260	85452312	52	9	0.4526	0.0982	0.3544	71.5104	Hyper
NC_019458.2	88631761	88631908	147	5	0.16	0.862	-0.702	-27.453	Hypo		NC_019463.2	22720431	22721220	789	77	0.4629	0.1051	0.3579	368.343	Hyper
NC_019472.2	30659235	30659334	99	4	0.0812	0.7827	-0.7014	-24.7311	Hypo		NC_019476.2	58585944	58586006	62	15	0.6733	0.3139	0.3594	58.9643	Hyper
NC_019482.2	7832462	7832562	100	4	0.1145	0.8149	-0.7004	-21.9545	Hypo		NC_019460.2	213470201	213470408	207	25	0.6464	0.2862	0.3602	105.645	Hyper
NC_019464.2	74851348	74851446	98	5	0.081	0.7799	-0.6989	-32.9151	Hypo		NC_019459.2	246165609	246165686	77	8	0.6271	0.2597	0.3674	28.1765	Hyper
NC_019479.2	29932154	29932322	168	11	0.0486	0.7468	-0.6982	-117.448	Hypo		NC_019462.2	40994893	40995038	145	13	0.5873	0.2187	0.3686	56.7821	Hyper
NC_019479.2	23211383	23211489	106	8	0.0869	0.7826	-0.6957	-57.6675	Hypo		NC_019460.2	76839748	76839906	158	12	0.52	0.1511	0.3689	56.2695	Hyper
NC_019482.2	17409590	17409675	85	4	0.0914	0.7846	-0.6931	-22.0021	Hypo		NC_019468.2	35895733	35895802	69	10	0.4629	0.093	0.3699	39.7244	Hyper
NC_019460.2	178239115	178239195	80	4	0.108	0.8	-0.6921	-22.1226	Hypo		NC_019481.2	39440456	39440589	133	13	0.5409	0.1708	0.3701	54.8844	Hyper
NC_019470.2	45776857	45776927	70	5	0.1275	0.8195	-0.692	-27.7742	Hypo		NC_019461.2	29509656	29509712	56	8	0.5942	0.2236	0.3706	34.1211	Hyper
NC_019483.2	42577329	42577384	55	4	0.1505	0.8425	-0.692	-22.1409	Hypo		NC_019462.2	35489452	35489539	87	4	0.5151	0.1443	0.3708	13.7308	Hyper
NC_019474.2	52084351	52084423	72	4	0.1059	0.7972	-0.6914	-21.1682	Hypo		NC_019462.2	34877616	34877718	102	20	0.5734	0.2023	0.3711	79.9477	Hyper
NC_019462.2	19075504	19075610	106	5	0.1307	0.8208	-0.6901	-28.386	Hypo		NC_019480.2	1352741	1352932	191	13	0.5093	0.1381	0.3712	54.0638	Hyper
NC_019478.2	7683432	7683517	85	4	0.1216	0.8112	-0.6896	-20.6906	Hypo		NC_019466.2	14132383	14132458	75	8	0.4933	0.1207	0.3726	33.667	Hyper
NC_019474.2	66660600	66660692	92	5	0.1627	0.8513	-0.6886	-28.8677	Hypo		NC_019467.2	50818870	50818988	118	14	0.6137	0.2398	0.374	48.9898	Hyper
NC_019482.2	34299738	34299832	94	5	0.1119	0.7983	-0.6864	-28.8333	Hypo		NC_019469.2	5568989	5569100	111	12	0.6064	0.2306	0.3758	46.6047	Hyper
NC_019475.2	21932343	21932416	73	5	0.1249	0.8108	-0.686	-28.1339	Hypo		NC_019478.2	45076287	45076430	143	23	0.6651	0.2893	0.3758	96.8935	Hyper
NC_019470.2	60580046	60580123	77	5	0.122	0.8077	-0.6858	-27.7471	Hypo		NC_019465.2	87448616	87448689	73	10	0.5652	0.189	0.3762	35.5823	Hyper
NC_019475.2	56588763	56588848	85	4	0.1204	0.8032	-0.6828	-19.9494	Hypo		NC_019481.2	1316195	1316313	118	19	0.4966	0.1186	0.378	88.1695	Hyper
NC_019471.2	58736398	58736486	88	4	0.1176	0.8002	-0.6826	-20.4401	Hypo		NC_019474.2	68826056	68826142	86	8	0.5066	0.1268	0.3798	27.8602	Hyper
NC_019458.2	215966053	215966117	64	4	0.1448	0.8274	-0.6826	-20.8613	Hypo		NC_019459.2	243704658	243704730	72	5	0.5347	0.1549	0.3798	18.4627	Hyper
NC_019480.2	46435641	46435758	117	5	0.0986	0.7799	-0.6813	-29.8913	Hypo		NC_019471.2	59405571	59405623	52	5	0.5013	0.1214	0.3799	20.9552	Hyper
NC_019474.2	70490412	70490487	75	5	0.1101	0.79	-0.68	-26.8921	Hypo		NC_019462.2	103733865	103733966	101	14	0.6138	0.2316	0.3822	51.8112	Hyper
NC_019460.2	210582620	210582711	91	5	0.0907	0.7682	-0.6775	-28.89	Hypo		NC_019469.2	25146579	25146639	60	5	0.621	0.2357	0.3853	21.5947	Hyper
NC_019466.2	14362834	14362956	122	6	0.1744	0.8504	-0.676	-40.5142	Hypo		NC_019464.2	97677119	97677275	156	21	0.5592	0.1731	0.3861	94.2682	Hyper
NC_019478.2	2066828	2066912	84	5	0.1384	0.8131	-0.6747	-25.306	Hypo		NC_019469.2	56055599	56055705	106	17	0.731	0.3438	0.3872	65.2926	Hyper
NC_019476.2	52825125	52825187	62	4	0.1577	0.8308	-0.6732	-19.9797	Hypo		NC_019468.2	22689016	22689094	78	10	0.6147	0.2261	0.3886	38.2116	Hyper
NC_019478.2	45743483	45743600	117	8	0.0933	0.7655	-0.6723	-58.5055	Hypo		NC_019480.2	44911844	44911942	98	13	0.63	0.2408	0.3892	51.1175	Hyper
NC_019476.2	4470914	4471040	126	6	0.1422	0.813	-0.6708	-37.5373	Hypo		NC_019459.2	186757882	186758191	309	27	0.6386	0.2475	0.3911	130.706	Hyper
NC_019481.2	10327190	10327288	98	4	0.1149	0.7853	-0.6704	-19.5785	Hypo		NC_019471.2	42129709	42129822	113	10	0.644	0.2527	0.3913	31.7925	Hyper
NC_019478.2	23627107	23627208	101	5	0.0821	0.7517	-0.6696	-31.3365	Hypo		NC_019466.2	93360227	93360498	271	11	0.4705	0.0791	0.3914	56.9799	Hyper
NC_019461.2	5950253	5950353	100	4	0.1251	0.7944	-0.6692	-19.6377	Hypo		NC_019460.2	7628311	7628375	64	9	0.6296	0.2375	0.3921	29.6	Hyper
NC_019483.2	9399802	9399860	58	5	0.1271	0.7963	-0.6691	-25.8903	Hypo		NC_019460.2	102531731	102531838	107	11	0.6384	0.2453	0.3932	35.2159	Hyper
NC_019462.2	19518691	19518788	97	4	0.0687	0.7376	-0.6689	-22.7475	Hypo		NC_019463.2	115016465	115016600	135	14	0.5897	0.1943	0.3954	46.2392	Hyper
NC_019460.2	198941671	198941740	69	4	0.1311	0.8	-0.6689	-21.7297	Hypo		NC_019462.2	41833285	41833336	51	6	0.4916	0.0945	0.3971	21.9584	Hyper
NC_019475.2	15048193	15048273	80	6	0.1007	0.7693	-0.6686	-35.8952	Hypo		NC_019472.2	75180838	75181088	250	13	0.6436	0.2448	0.3987	50.7563	Hyper
NC_019478.2	42009657	42009751	94	4	0.1068	0.7743	-0.6676	-18.8262	Hypo		NC_019473.2	3570800	3571061	261	11	0.5064	0.1073	0.399	46.2026	Hyper
NC_019479.2	42971041	42971096	55	6	0.0596	0.7265	-0.6669	-36.3378	Hypo		NC_019484.2	1549378	1549446	68	12	0.5688	0.1699	0.399	44.6337	Hyper
NC_019475.2	33187840	33187912	72	4	0.1134	0.7796	-0.6661	-18.9726	Hypo		NC_019466.2	3705832	3706090	258	26	0.5755	0.1762	0.3993	163.162	Hyper
NC_019470.2	57902145	57902245	100	4	0.1047	0.7705	-0.6658	-19.2297	Hypo		NC_019472.2	74382435	74382556	121	7	0.5276	0.1271	0.4005	25.342	Hyper
NC_019468.2	16992247	16992328	81	4	0.1085	0.7705	-0.6619	-18.8728	Hypo		NC_019460.2	215475884	215475956	72	8	0.6224	0.2208	0.4016	28.2572	Hyper
NC_019470.2	38396901	38396993	92	5	0.1346	0.7964	-0.6617	-24.7632	Hypo		NC_019475.2	65655745	65655834	89	10	0.5788	0.1772	0.4017	41.3175	Hyper
NC_019472.2	80362194	80362305	111	12	0.1423	0.8034	-0.6611	-85.4303	Hypo		NC_019482.2	43946738	43946823	85	10	0.6319	0.23	0.4019	33.9284	Hyper
NC_019462.2	40788665	40788736	71	7	0.1193	0.78	-0.6607	-39.7001	Hypo		NC_019460.2	223397200	223397304	104	9	0.5403	0.1378	0.4024	35.0722	Hyper
NC_019478.2	46655369	46655427	58	6	0.1367	0.796	-0.6593	-31.0384	Hypo		NC_019478.2	44553047	44553120	73	8	0.6116	0.209	0.4027	27.3136	Hyper
NC_019484.2	10882994	10883085	91	4	0.1087	0.7678	-0.6592	-19.858	Hypo		NC_019470.2	61157272	61164460	7188	25	0.6661	0.2626	0.4035	144.762	Hyper
NC_019480.2	37174077	37174152	75	4	0.1503	0.8094	-0.6591	-19.1343	Hypo		NC_019478.2	31070565	31070773	208	11	0.4982	0.0944	0.4038	50.2309	Hyper
NC_019460.2	149799788	149799848	60	7	0.1185	0.7762	-0.6577	-41.1191	Hypo		NC_019470.2	80360477	80360727	250	9	0.5836	0.1791	0.4044	33.9029	Hyper
NC_019462.2	7769673	7769736	63	7	0.118	0.7742	-0.6562	-38.8684	Hypo		NC_019479.2	43107673	43107842	169	16	0.6478	0.2427	0.405	64.7151	Hyper
NC_019460.2	103782440	103782573	133	5	0.1605	0.8163	-0.6558	-25.1129	Hypo		NC_019467.2	82694730	82694930	200	13	0.5185	0.1125	0.406	64.1421	Hyper
NC_019466.2	15397100	15397188	88	7	0.2166	0.8723	-0.6558	-38.6518	Hypo		NC_019460.2	7650527	7650615	88	9	0.6122	0.2058	0.4065	32.3013	Hyper
NC_019464.2	19158163	19158370	207	13	0.1378	0.7935	-0.6557	-95.3828	Hypo		NC_019469.2	73525538	73525697	159	21	0.6395	0.2319	0.4076	96.942	Hyper
NC_019460.2	133400330	133400387	57	6	0.1524	0.808	-0.6557	-31.1537	Hypo		NC_019460.2	133468763	133468834	71	7	0.5456	0.1378	0.4078	26.919	Hyper
NC_019460.2	99323895	99323968	73	5	0.1127	0.7682	-0.6555	-24.7127	Hypo		NC_019472.2	33408940	33409140	200	11	0.5046	0.0961	0.4084	52.4204	Hyper
NC_019484.2	1456056	1456193	137	12	0.0865	0.7413	-0.6548	-99.9155	Hypo		NC_019461.2	25985811	25985938	127	11	0.6087	0.2	0.4087	59.3439	Hyper
NC_019458.2	118740388	118740456	68	4	0.155	0.8095	-0.6545	-18.2398	Hypo		NC_019460.2	219950369	219950472	103	7	0.5184	0.1073	0.4111	30.17	Hyper
NC_019461.2	94673897	94674003	106	6	0.1147	0.7687	-0.654	-38.7835	Hypo		NC_019474.2	66699577	66699722	145	9	0.6693	0.2579	0.4115	30.0456	Hyper
NC_019469.2	67651693	67651772	79	6	0.1393	0.7921	-0.6529	-31.2128	Hypo		NC_019466.2	14947079	14947206	127	14	0.6537	0.2421	0.4117	55.3042	Hyper
NC_019478.2	45417940	45418030	90	4	0.1216	0.7743	-0.6527	-17.6279	Hypo		NC_019461.2	74970686	74970822	136	15	0.7961	0.3843	0.4118	65.1481	Hyper
NC_019468.2	60266458	60266522	64	6	0.127	0.7794	-0.6524	-30.9791	Hypo		NC_019465.2	90266097	90266185	88	11	0.6355	0.2235	0.412	38.8578	Hyper
NC_019478.2	48167631	48167717	86	6	0.1437	0.796	-0.6523	-30.1418	Hypo		NC_019468.2	12411839	12411956	117	9	0.6039	0.1919	0.412	31.5281	Hyper
NC_019462.2	93268052	93268106	54	4	0.1102	0.7624	-0.6522	-18.0274	Hypo		NC_019480.2	41963894	41963954	60	7	0.6366	0.2237	0.4129	23.8256	Hyper
NC_019467.2	11535622	11535680	58	4	0.1382	0.7903	-0.6521	-18.6723	Hypo		NC_019471.2	11718858	11718947	89	5	0.6468	0.2324	0.4143	15.9682	Hyper
NC_019471.2	47044477	47044536	59	4	0.1258	0.7774	-0.6515	-17.7525	Hypo		NC_019465.2	90380011	90380236	225	17	0.6046	0.1903	0.4143	78.9448	Hyper
NC_019468.2	7775722	7775780	58	7	0.158	0.8094	-0.6514	-38.094	Hypo		NC_019460.2	1620190	1620395	205	12	0.6132	0.1978	0.4154	50.5731	Hyper
NC_019475.2	67716464	67716566	102	7	0.1462	0.7959	-0.6496	-46.356	Hypo		NC_019468.2	61532951	61533032	81	10	0.6399	0.224	0.4158	37.412	Hyper
NC_019484.2	5705078	5705178	100	5	0.1265	0.7755	-0.649	-25.9281	Hypo		NC_019479.2	43094449	43094508	59	8	0.5766	0.1604	0.4163	29.9821	Hyper
NC_019478.2	44359127	44359225	98	5	0.123	0.7712	-0.6482	-25.5501	Hypo		NC_019470.2	53548434	53548500	66	7	0.5145	0.0976	0.4169	27.5304	Hyper
NC_019481.2	36230378	36230452	74	7	0.1603	0.808	-0.6477	-38.1488	Hypo		NC_019473.2	15235821	15235935	114	14	0.5605	0.1433	0.4172	74.279	Hyper
NC_019474.2	53295610	53295718	108	10	0.1627	0.8095	-0.6468	-62.3763	Hypo		NC_019460.2	2239682	2239928	246	17	0.644	0.2261	0.4179	75.0262	Hyper
NC_019478.2	31442274	31442352	78	8	0.1042	0.7498	-0.6456	-47.1806	Hypo		NC_019480.2	61039927	61040162	235	17	0.5615	0.143	0.4185	98.671	Hyper
NC_019469.2	27762729	27762807	78	6	0.1077	0.7523	-0.6445	-32.6255	Hypo		NC_019460.2	223155178	223155273	95	21	0.6198	0.2002	0.4196	102.822	Hyper
NC_019469.2	1268130	1268282	152	7	0.1273	0.7711	-0.6438	-38.1639	Hypo		NC_019478.2	46880158	46880267	109	10	0.6696	0.2487	0.421	36.0837	Hyper
NC_019469.2	49122325	49122416	91	7	0.1273	0.7711	-0.6438	-38.1591	Hypo		NC_019460.2	216929396	216929497	101	16	0.685	0.264	0.421	63.3909	Hyper
NC_019481.2	451531	451627	96	8	0.1606	0.8033	-0.6427	-44.5358	Hypo		NC_019460.2	208143696	208143790	94	9	0.6181	0.1963	0.4218	31.8329	Hyper
NC_019472.2	78340289	78340400	111	7	0.1849	0.8274	-0.6425	-39.2167	Hypo		NC_019463.2	39462148	39462208	60	5	0.527	0.105	0.422	16.7082	Hyper
NC_019471.2	22203728	22203811	83	5	0.1272	0.7696	-0.6424	-23.0497	Hypo		NC_019464.2	88430822	88430941	119	11	0.5769	0.1541	0.4228	41.0585	Hyper
NC_019471.2	38232644	38232730	86	6	0.1357	0.7774	-0.6417	-29.5811	Hypo		NC_019467.2	76603638	76603783	145	8	0.5187	0.0959	0.4228	36.2054	Hyper
NC_019469.2	42281587	42281674	87	4	0.1289	0.77	-0.641	-17.2383	Hypo		NC_019471.2	33570373	33570488	115	10	0.5455	0.121	0.4244	42.2615	Hyper
NC_019470.2	54077347	54077444	97	5	0.122	0.7625	-0.6406	-23.8829	Hypo		NC_019468.2	12989571	12989655	84	6	0.5636	0.1391	0.4244	24.1297	Hyper
NC_019467.2	84485827	84485943	116	7	0.1082	0.7487	-0.6406	-43.8896	Hypo		NC_019478.2	28493829	28493884	55	5	0.5959	0.1711	0.4248	17.2554	Hyper
NC_019476.2	46780270	46780369	99	4	0.1242	0.7644	-0.6403	-18.809	Hypo		NC_019465.2	2751674	2751769	95	8	0.5889	0.1639	0.425	28.6155	Hyper
NC_019458.2	2466188	2466305	117	9	0.1668	0.807	-0.6402	-54.9714	Hypo		NC_019468.2	60318188	60318355	167	18	0.5397	0.1144	0.4253	97.0618	Hyper
NC_019462.2	2413370	2413470	100	7	0.1411	0.78	-0.6389	-36.2085	Hypo		NC_019481.2	35348922	35349022	100	7	0.6377	0.2096	0.4281	22.3197	Hyper
NC_019460.2	174370013	174370162	149	8	0.0764	0.7152	-0.6388	-61.0092	Hypo		NC_019475.2	13759572	13759693	121	8	0.7828	0.3541	0.4287	29.4154	Hyper
NC_019469.2	45347778	45347949	171	6	0.1251	0.7637	-0.6386	-31.673	Hypo		NC_019474.2	42157867	42157924	57	5	0.6145	0.1849	0.4296	15.1231	Hyper
NC_019472.2	29841942	29842047	105	13	0.1994	0.8379	-0.6385	-88.8258	Hypo		NC_019462.2	16778434	16778521	87	7	0.5651	0.1351	0.43	24.1014	Hyper
NC_019476.2	53440269	53440362	93	6	0.1872	0.8248	-0.6376	-29.3207	Hypo		NC_019475.2	59111000	59111066	66	6	0.5753	0.1451	0.4302	20.251	Hyper
NC_019462.2	105289331	105289422	91	8	0.1504	0.787	-0.6366	-43.3907	Hypo		NC_019480.2	48538574	48538634	60	7	0.6591	0.2267	0.4324	20.6848	Hyper
NC_019460.2	80188939	80189074	135	12	0.1465	0.7831	-0.6366	-78.6944	Hypo		NC_019469.2	1671510	1671564	54	4	0.7679	0.3352	0.4327	14.4727	Hyper
NC_019462.2	42418659	42418710	51	5	0.1177	0.7542	-0.6365	-22.6663	Hypo		NC_019462.2	16760667	16760794	127	14	0.6787	0.2455	0.4332	56.4374	Hyper
NC_019468.2	56897958	56898022	64	5	0.1406	0.7766	-0.6361	-22.4758	Hypo		NC_019482.2	33471083	33471140	57	6	0.5879	0.1544	0.4335	21.4336	Hyper
NC_019484.2	119034440	119034491	51	5	0.1577	0.7933	-0.6356	-23.5746	Hypo		NC_019464.2	42631141	42631364	223	9	0.5721	0.137	0.4351	39.4793	Hyper
NC_019478.2	43704719	43704806	87	7	0.1429	0.7754	-0.6325	-34.7157	Hypo		NC_019465.2	79257095	79257278	183	10	0.5949	0.1595	0.4354	41.2292	Hyper
NC_019461.2	94304766	94304954	188	6	0.1074	0.7398	-0.6324	-34.0586	Hypo		NC_019462.2	93365442	93365533	91	5	0.6018	0.1664	0.4354	14.3335	Hyper
NC_019470.2	64713886	64713984	98	5	0.0888	0.7202	-0.6314	-24.4843	Hypo		NC_019475.2	65377278	65377340	62	5	0.6667	0.2301	0.4366	15.8312	Hyper
NC_019484.2	6288318	6288417	99	6	0.1638	0.7948	-0.6309	-32.2635	Hypo		NC_019474.2	44818671	44818763	92	7	0.6388	0.2008	0.438	22.725	Hyper
NC_019460.2	5043675	5043750	75	6	0.1524	0.7831	-0.6307	-28.4644	Hypo		NC_019460.2	165353070	165353210	140	7	0.5993	0.1612	0.4381	22.0739	Hyper
NC_019476.2	48133989	48134060	71	8	0.1518	0.7822	-0.6305	-42.434	Hypo		NC_019460.2	2575525	2575605	80	6	0.6393	0.2011	0.4381	18.8063	Hyper
NC_019471.2	836510	836606	96	5	0.1152	0.7453	-0.6301	-23.072	Hypo		NC_019459.2	1173427	1173640	213	23	0.6951	0.2563	0.4388	121.275	Hyper
NC_019467.2	85667596	85667666	70	6	0.1252	0.7552	-0.63	-29.9958	Hypo		NC_019484.2	1145469	1145588	119	8	0.5953	0.1553	0.44	31.2716	Hyper
NC_019469.2	47227526	47227596	70	7	0.1875	0.8173	-0.6298	-42.0308	Hypo		NC_019469.2	78471301	78471451	150	12	0.5742	0.1337	0.4405	53.6027	Hyper
NC_019479.2	42969242	42969335	93	5	0.1252	0.7546	-0.6294	-22.414	Hypo		NC_019469.2	77957842	77958048	206	8	0.6078	0.1669	0.4409	28.1497	Hyper
NC_019472.2	39048113	39048210	97	5	0.1457	0.775	-0.6293	-21.9877	Hypo		NC_019459.2	999383	999466	83	6	0.7139	0.2729	0.4409	17.5844	Hyper
NC_019458.2	261107680	261107858	178	8	0.1432	0.7724	-0.6292	-42.8798	Hypo		NC_019483.2	850519	850662	143	17	0.6644	0.2226	0.4419	75.1108	Hyper
NC_019462.2	40592141	40592259	118	8	0.0887	0.7178	-0.6291	-46.5352	Hypo		NC_019478.2	36216957	36217191	234	8	0.6322	0.189	0.4433	29.882	Hyper
NC_019480.2	3808511	3808602	91	6	0.1014	0.7304	-0.6289	-31.853	Hypo		NC_019481.2	39268147	39268406	259	7	0.5574	0.114	0.4434	28.8325	Hyper
NC_019480.2	2186105	2186377	272	8	0.1171	0.7459	-0.6288	-48.4445	Hypo		NC_019472.2	75121961	75122027	66	6	0.6621	0.2177	0.4444	21.1855	Hyper
NC_019462.2	19947197	19947266	69	5	0.1255	0.7542	-0.6287	-21.9439	Hypo		NC_019462.2	103716988	103717107	119	9	0.5917	0.1467	0.4449	32.8	Hyper
NC_019479.2	8478594	8478713	119	8	0.1404	0.7685	-0.628	-42.5047	Hypo		NC_019464.2	99459116	99459323	207	16	0.5922	0.1471	0.4451	79.1466	Hyper
NC_019471.2	16727906	16728015	109	7	0.1347	0.7626	-0.6279	-34.9578	Hypo		NC_019467.2	20932846	20932928	82	8	0.6288	0.1836	0.4452	26.1895	Hyper
NC_019460.2	100085561	100085642	81	6	0.0883	0.7161	-0.6278	-32.8079	Hypo		NC_019460.2	57835353	57835497	144	11	0.6511	0.2058	0.4453	43.0064	Hyper
NC_019481.2	37458141	37458236	95	7	0.1259	0.7536	-0.6277	-36.4568	Hypo		NC_019473.2	5152312	5152386	74	6	0.5855	0.1396	0.4459	18.7381	Hyper
NC_019475.2	59746027	59746126	99	4	0.1761	0.8024	-0.6263	-16.1038	Hypo		NC_019474.2	63541034	63541238	204	15	0.6693	0.2224	0.447	68.3267	Hyper
NC_019471.2	10933794	10933854	60	6	0.1173	0.7433	-0.626	-28.5142	Hypo		NC_019479.2	49429291	49429481	190	19	0.57	0.1229	0.4471	141.247	Hyper
NC_019460.2	100570226	100570576	350	4	0.0781	0.7039	-0.6258	-22.9984	Hypo		NC_019459.2	185697942	185698057	115	10	0.7258	0.2784	0.4474	31.5013	Hyper
NC_019461.2	76742168	76742269	101	12	0.2036	0.8259	-0.6224	-75.6979	Hypo		NC_019460.2	111840956	111841035	79	8	0.6373	0.1893	0.448	29.7786	Hyper
NC_019460.2	53313690	53313750	60	6	0.1202	0.7416	-0.6214	-28.204	Hypo		NC_019468.2	6348	6407	59	6	0.5939	0.1458	0.4481	19.2273	Hyper
NC_019470.2	33986109	33986209	100	4	0.1261	0.7474	-0.6212	-21.1818	Hypo		NC_019470.2	17385832	17385933	101	6	0.5966	0.1483	0.4483	19.0689	Hyper
NC_019481.2	9344902	9345056	154	7	0.0802	0.7014	-0.6212	-45.728	Hypo		NC_019483.2	16137529	16137623	94	7	0.6092	0.1602	0.449	25.3584	Hyper
NC_019478.2	28933760	28933923	163	12	0.1371	0.758	-0.6208	-80.2267	Hypo		NC_019484.2	90175682	90175777	95	8	0.5724	0.1225	0.4498	33.4323	Hyper
NC_019471.2	7571098	7571200	102	12	0.1838	0.8041	-0.6203	-73.0256	Hypo		NC_019461.2	79013811	79013879	68	5	0.6444	0.1939	0.4505	17.6561	Hyper
NC_019461.2	105326436	105326490	54	4	0.137	0.7571	-0.6201	-16.2333	Hypo		NC_019470.2	74819660	74819815	155	12	0.5845	0.1339	0.4506	50.4869	Hyper
NC_019470.2	55708969	55709025	56	6	0.158	0.7778	-0.6197	-27.3237	Hypo		NC_019470.2	76429962	76430097	135	12	0.6145	0.1637	0.4508	47.9	Hyper
NC_019469.2	5552933	5553022	89	5	0.1013	0.7201	-0.6188	-23.38	Hypo		NC_019473.2	69999576	69999912	336	11	0.6351	0.1831	0.4519	56.8649	Hyper
NC_019469.2	37995238	37995364	126	8	0.1889	0.8076	-0.6187	-41.3512	Hypo		NC_019480.2	61827777	61827898	121	17	0.6891	0.2369	0.4522	77.5731	Hyper
NC_019468.2	51430520	51430594	74	11	0.1152	0.7326	-0.6174	-71.4702	Hypo		NC_019481.2	24880939	24881000	61	7	0.6563	0.2037	0.4526	25.6133	Hyper
NC_019484.2	65960143	65960241	98	8	0.1511	0.7678	-0.6167	-42.7479	Hypo		NC_019473.2	66424723	66424830	107	5	0.6266	0.1738	0.4528	16.4471	Hyper
NC_019481.2	40040064	40040152	88	6	0.1366	0.7522	-0.6156	-27.4821	Hypo		NC_019460.2	6175360	6175602	242	13	0.6974	0.2434	0.454	63.1124	Hyper
NC_019471.2	13830315	13830380	65	7	0.1478	0.7626	-0.6148	-33.1038	Hypo		NC_019472.2	77965827	77965920	93	8	0.663	0.2089	0.4541	26.8424	Hyper
NC_019481.2	9860946	9861120	174	10	0.0933	0.7075	-0.6142	-66.9129	Hypo		NC_019458.2	139055671	139055727	56	4	0.5782	0.1234	0.4548	12.9148	Hyper
NC_019460.2	7215153	7215219	66	8	0.185	0.7992	-0.6142	-40.2079	Hypo		NC_019470.2	57929440	57929507	67	10	0.6675	0.2123	0.4552	37.0616	Hyper
NC_019472.2	77733710	77733799	89	8	0.0934	0.7075	-0.6141	-45.4119	Hypo		NC_019461.2	41296827	41296886	59	4	0.5588	0.1034	0.4554	13.7178	Hyper
NC_019467.2	16809427	16809507	80	5	0.1573	0.7706	-0.6133	-21.118	Hypo		NC_019473.2	71459865	71459930	65	5	0.6009	0.1449	0.456	15.974	Hyper
NC_019471.2	6229364	6229540	176	5	0.1217	0.7342	-0.6126	-25.2919	Hypo		NC_019479.2	40373196	40373388	192	6	0.6935	0.237	0.4565	22.8317	Hyper
NC_019466.2	29626846	29626934	88	4	0.1781	0.7907	-0.6126	-15.5232	Hypo		NC_019476.2	11420919	11421107	188	8	0.7012	0.2447	0.4565	27.461	Hyper
NC_019468.2	55898097	55898196	99	7	0.1451	0.7572	-0.6121	-32.9718	Hypo		NC_019479.2	49277212	49277270	58	6	0.5956	0.1388	0.4568	20.0815	Hyper
NC_019480.2	32961677	32961762	85	5	0.145	0.7565	-0.6115	-21.419	Hypo		NC_019473.2	31583057	31583199	142	11	0.6788	0.222	0.4568	45.7959	Hyper
NC_019467.2	85661900	85661986	86	5	0.1476	0.7579	-0.6104	-20.9796	Hypo		NC_019471.2	7530619	7530706	87	12	0.7025	0.2448	0.4577	46.7714	Hyper
NC_019479.2	49890807	49892068	1261	10	0.1915	0.8016	-0.61	-57.8259	Hypo		NC_019466.2	43224748	43224851	103	19	0.6517	0.1936	0.458	92.2116	Hyper
NC_019460.2	32518845	32518946	101	6	0.1167	0.7254	-0.6087	-28.4145	Hypo		NC_019480.2	24758818	24758949	131	8	0.5733	0.1148	0.4585	34.0351	Hyper
NC_019470.2	57882055	57882303	248	6	0.1219	0.7302	-0.6082	-35.5397	Hypo		NC_019480.2	42077626	42077702	76	8	0.5733	0.1148	0.4585	34.0288	Hyper
NC_019479.2	47122972	47123143	171	6	0.0998	0.7079	-0.6081	-32.4056	Hypo		NC_019458.2	1167213	1167439	226	14	0.5886	0.129	0.4596	68.4528	Hyper
NC_019467.2	16085376	16085437	61	6	0.2405	0.8486	-0.6081	-32.2861	Hypo		NC_019463.2	59923533	59923598	65	7	0.5918	0.1321	0.4598	30.7518	Hyper
NC_019471.2	11021070	11021162	92	6	0.1357	0.7433	-0.6076	-26.3864	Hypo		NC_019464.2	20577878	20578006	128	9	0.6058	0.1453	0.4605	33.2183	Hyper
NC_019480.2	50740304	50740388	84	7	0.2028	0.8099	-0.6071	-33.0224	Hypo		NC_019460.2	90772216	90772351	135	8	0.7508	0.2903	0.4606	27.6049	Hyper
NC_019470.2	53452308	53452391	83	6	0.1292	0.7353	-0.606	-26.6692	Hypo		NC_019460.2	111556554	111556620	66	4	0.5543	0.0937	0.4606	13.5543	Hyper
NC_019470.2	66573695	66573758	63	8	0.1309	0.7353	-0.6044	-39.7709	Hypo		NC_019470.2	77366333	77366436	103	14	0.6549	0.1943	0.4607	62.3973	Hyper
NC_019481.2	25485060	25485190	130	7	0.0867	0.6909	-0.6042	-41.8444	Hypo		NC_019471.2	14971620	14971716	96	8	0.6653	0.2042	0.4611	27.9387	Hyper
NC_019481.2	982350	982433	83	7	0.1259	0.7301	-0.6041	-33.534	Hypo		NC_019471.2	53074376	53074538	162	11	0.7233	0.2616	0.4617	48.9135	Hyper
NC_019468.2	9756719	9756783	64	6	0.1332	0.7373	-0.6041	-26.25	Hypo		NC_019466.2	30043058	30043195	137	11	0.651	0.1893	0.4617	43.1568	Hyper
NC_019468.2	28855217	28855301	84	4	0.1332	0.7373	-0.6041	-15.0691	Hypo		NC_019478.2	9275882	9275999	117	10	0.581	0.119	0.462	49.4568	Hyper
NC_019479.2	37632692	37632774	82	5	0.1069	0.7109	-0.604	-21.7138	Hypo		NC_019460.2	221489549	221489668	119	9	0.5794	0.1172	0.4622	41.3079	Hyper
NC_019464.2	89736503	89736595	92	5	0.1402	0.7436	-0.6034	-20.4646	Hypo		NC_019468.2	53302953	53303005	52	8	0.6748	0.2112	0.4636	30.9675	Hyper
NC_019474.2	5962595	5962734	139	6	0.0922	0.6955	-0.6033	-32.1031	Hypo		NC_019470.2	50200105	50200187	82	9	0.6505	0.1865	0.464	32.7303	Hyper
NC_019481.2	40111592	40111662	70	7	0.1088	0.711	-0.6022	-38.9222	Hypo		NC_019475.2	66086955	66087057	102	6	0.6101	0.1451	0.4649	22.8947	Hyper
NC_019474.2	71470968	71471142	174	9	0.1087	0.7105	-0.6017	-48.5151	Hypo		NC_019479.2	43150983	43151080	97	5	0.6073	0.1421	0.4652	21.4195	Hyper
NC_019469.2	10895096	10895206	110	6	0.089	0.6902	-0.6013	-32.7536	Hypo		NC_019463.2	68472963	68473050	87	6	0.6412	0.1761	0.4652	18.2095	Hyper
NC_019484.2	1051578	1051666	88	5	0.1352	0.7352	-0.6001	-21.4619	Hypo		NC_019464.2	14356117	14356210	93	9	0.646	0.1803	0.4657	32.6764	Hyper
NC_019474.2	51135310	51135375	65	5	0.1204	0.7204	-0.6	-24.8238	Hypo		NC_019467.2	35302862	35303093	231	17	0.6182	0.1521	0.4661	96.1935	Hyper
NC_019470.2	80731002	80731084	82	4	0.136	0.7353	-0.5993	-14.8777	Hypo		NC_019460.2	135996633	135996692	59	7	0.6025	0.136	0.4665	27.8513	Hyper
NC_019470.2	82882170	82882237	67	4	0.136	0.7353	-0.5993	-14.8734	Hypo		NC_019465.2	87969237	87969316	79	9	0.6471	0.1801	0.467	34.0646	Hyper
NC_019458.2	260719620	260719716	96	4	0.1734	0.7724	-0.599	-14.0905	Hypo		NC_019480.2	62281519	62281719	200	17	0.6314	0.1642	0.4672	94.4603	Hyper
NC_019461.2	15445605	15445772	167	16	0.1937	0.7926	-0.5989	-110.835	Hypo		NC_019460.2	93898873	93899024	151	9	0.6268	0.1593	0.4675	37.5365	Hyper
NC_019478.2	33855067	33855185	118	7	0.0768	0.6743	-0.5974	-42.8647	Hypo		NC_019461.2	92204136	92204321	185	14	0.6661	0.1983	0.4678	66.8022	Hyper
NC_019458.2	2051463	2051628	165	11	0.1887	0.785	-0.5964	-56.54	Hypo		NC_019475.2	68432016	68432132	116	8	0.624	0.1559	0.4681	29.1013	Hyper
NC_019481.2	5393810	5393887	77	7	0.1088	0.7052	-0.5964	-34.4782	Hypo		NC_019470.2	78795775	78795965	190	13	0.5942	0.1251	0.4691	69.8915	Hyper
NC_019466.2	80575900	80575970	70	6	0.2144	0.8095	-0.5951	-25.0211	Hypo		NC_019469.2	25100698	25100761	63	5	0.6038	0.1332	0.4706	17.4173	Hyper
NC_019478.2	43339957	43340066	109	6	0.0826	0.6775	-0.5949	-30.3636	Hypo		NC_019459.2	182947138	182947319	181	10	0.6764	0.2056	0.4708	40.9924	Hyper
NC_019465.2	88885406	88885470	64	8	0.1703	0.7651	-0.5948	-37.8925	Hypo		NC_019463.2	45762839	45762909	70	4	0.5728	0.1007	0.4721	11.7404	Hyper
NC_019462.2	36654148	36654278	130	9	0.1109	0.7057	-0.5948	-51.1487	Hypo		NC_019459.2	184446024	184446101	77	6	0.8471	0.3736	0.4735	20.0702	Hyper
NC_019462.2	3436661	3436907	246	14	0.1015	0.696	-0.5945	-93.6426	Hypo		NC_019463.2	108429433	108429530	97	9	0.5744	0.1007	0.4737	37.9817	Hyper
NC_019460.2	9055840	9055969	129	7	0.09	0.6841	-0.5941	-39.1361	Hypo		NC_019462.2	9342111	9342208	97	10	0.677	0.2023	0.4748	41.3991	Hyper
NC_019464.2	17490808	17490867	59	11	0.1799	0.7731	-0.5933	-59.3584	Hypo		NC_019467.2	13147630	13147704	74	10	0.6794	0.2041	0.4753	38.4318	Hyper
NC_019468.2	9005091	9005157	66	7	0.1452	0.7383	-0.5932	-34.3437	Hypo		NC_019460.2	133499937	133500035	98	5	0.6044	0.1289	0.4755	16.4455	Hyper
NC_019458.2	264001357	264001510	153	9	0.1967	0.7895	-0.5928	-41.7286	Hypo		NC_019469.2	77391160	77391258	98	10	0.6843	0.2076	0.4767	39.3956	Hyper
NC_019462.2	4222572	4222689	117	15	0.147	0.7399	-0.5928	-96.4693	Hypo		NC_019474.2	13765808	13765944	136	8	0.6006	0.1227	0.4779	43.291	Hyper
NC_019474.2	70178445	70179596	1151	5	0.1119	0.7041	-0.5922	-24.1802	Hypo		NC_019484.2	6655981	6656119	138	7	0.6208	0.1412	0.4796	28.6189	Hyper
NC_019458.2	28472528	28472643	115	6	0.1841	0.7755	-0.5914	-23.871	Hypo		NC_019479.2	45349472	45349568	96	10	0.682	0.2023	0.4797	40.0917	Hyper
NC_019463.2	112901693	112901790	97	6	0.2378	0.8289	-0.5911	-24.5676	Hypo		NC_019481.2	3273851	3273988	137	16	0.7317	0.2517	0.48	83.1218	Hyper
NC_019470.2	55193042	55193151	109	4	0.0863	0.6756	-0.5893	-18.7153	Hypo		NC_019466.2	13247323	13247407	84	8	0.686	0.2057	0.4803	29.9195	Hyper
NC_019466.2	47041353	47041445	92	6	0.1824	0.7709	-0.5885	-24.801	Hypo		NC_019475.2	29614727	29614837	110	13	0.7309	0.2502	0.4807	57.5145	Hyper
NC_019482.2	12939048	12939147	99	5	0.0801	0.6685	-0.5884	-27.4602	Hypo		NC_019465.2	90454361	90454441	80	11	0.6971	0.2156	0.4815	44.3825	Hyper
NC_019478.2	28689319	28689526	207	11	0.1305	0.7189	-0.5883	-65.6451	Hypo		NC_019464.2	97937671	97937793	122	8	0.632	0.1501	0.4819	29.934	Hyper
NC_019468.2	26804140	26804272	132	11	0.1529	0.7408	-0.5879	-63.3537	Hypo		NC_019477.2	16131965	16132034	69	6	0.7713	0.2862	0.4851	18.1868	Hyper
NC_019476.2	57624856	57625228	372	12	0.1613	0.7486	-0.5873	-72.4487	Hypo		NC_019470.2	77281186	77281267	81	6	0.6491	0.1638	0.4853	23.1904	Hyper
NC_019458.2	5839440	5839501	61	12	0.2248	0.8118	-0.5869	-60.7767	Hypo		NC_019467.2	30787194	30787246	52	4	0.6241	0.1369	0.4872	13.0917	Hyper
NC_019478.2	41458948	41459076	128	12	0.0783	0.6652	-0.5869	-91.5291	Hypo		NC_019469.2	2071225	2071373	148	11	0.649	0.1617	0.4873	48.2566	Hyper
NC_019474.2	44635687	44635754	67	9	0.1122	0.699	-0.5868	-49.7255	Hypo		NC_019460.2	2380313	2380444	131	10	0.5984	0.111	0.4874	48.7411	Hyper
NC_019458.2	11225223	11225322	99	7	0.1987	0.7855	-0.5868	-28.5223	Hypo		NC_019460.2	11420309	11420403	94	5	0.5712	0.0834	0.4878	20.9895	Hyper
NC_019463.2	57472405	57472456	51	4	0.2129	0.7993	-0.5864	-14.002	Hypo		NC_019484.2	45598060	45598172	112	5	0.8502	0.3617	0.4886	21.9482	Hyper
NC_019468.2	22679029	22681089	2060	19	0.1591	0.7434	-0.5843	-105.618	Hypo		NC_019464.2	85363493	85363619	126	5	0.613	0.1243	0.4888	17.7559	Hyper
NC_019478.2	49305651	49305760	109	7	0.1843	0.7685	-0.5842	-34.4201	Hypo		NC_019480.2	6628840	6628926	86	4	0.6873	0.1984	0.489	17.8531	Hyper
NC_019460.2	38947202	38947340	138	10	0.1152	0.6992	-0.584	-59.7225	Hypo		NC_019463.2	81625444	81625541	97	6	0.6757	0.1861	0.4896	18.4406	Hyper
NC_019466.2	32300703	32300822	119	9	0.1712	0.7542	-0.583	-43.9364	Hypo		NC_019480.2	58727605	58727684	79	7	0.6591	0.1671	0.492	26.6475	Hyper
NC_019469.2	45072787	45072884	97	7	0.0896	0.6719	-0.5824	-35.9614	Hypo		NC_019468.2	54178668	54178785	117	8	0.6405	0.1482	0.4924	34.1633	Hyper
NC_019474.2	66209495	66209613	118	10	0.1678	0.7495	-0.5817	-55.4041	Hypo		NC_019478.2	16058344	16058427	83	4	0.6587	0.166	0.4927	13.6593	Hyper
NC_019468.2	33057488	33057547	59	4	0.1152	0.6964	-0.5813	-15.5364	Hypo		NC_019467.2	73941463	73941574	111	10	0.6968	0.2041	0.4927	40.3578	Hyper
NC_019474.2	68272908	68272994	86	5	0.1283	0.7091	-0.5809	-23.0246	Hypo		NC_019469.2	31731832	31732144	312	8	0.7995	0.3066	0.4928	34.4093	Hyper
NC_019458.2	252877169	252877270	101	4	0.3282	0.9088	-0.5807	-13.9057	Hypo		NC_019483.2	13572405	13572463	58	8	0.7094	0.2159	0.4934	31.1165	Hyper
NC_019472.2	24015051	24015128	77	11	0.0812	0.6613	-0.5801	-63.6592	Hypo		NC_019483.2	36278863	36279000	137	11	0.6888	0.195	0.4937	47.0223	Hyper
NC_019470.2	34785465	34785566	101	5	0.2402	0.8195	-0.5793	-26.5895	Hypo		NC_019478.2	27546941	27546993	52	5	0.6116	0.1176	0.494	19.1836	Hyper
NC_019478.2	44619537	44619702	165	14	0.272	0.8501	-0.5781	-89.4702	Hypo		NC_019465.2	15364951	15365042	91	4	0.6421	0.148	0.4942	13.5007	Hyper
NC_019469.2	27807713	27807829	116	9	0.177	0.7519	-0.5748	-45.84	Hypo		NC_019464.2	20647877	20647992	115	12	0.6756	0.1803	0.4953	52.883	Hyper
NC_019467.2	85034508	85034766	258	5	0.1499	0.7246	-0.5747	-16.4927	Hypo		NC_019460.2	7143488	7143744	256	7	0.6934	0.1968	0.4966	28.5137	Hyper
NC_019460.2	12264840	12264916	76	4	0.1018	0.6764	-0.5746	-17.5945	Hypo		NC_019481.2	25409710	25409827	117	6	0.7625	0.2658	0.4967	24.513	Hyper
NC_019461.2	76567980	76568118	138	13	0.1768	0.7512	-0.5744	-76.6406	Hypo		NC_019466.2	92795031	92795119	88	5	0.6423	0.145	0.4973	17.6345	Hyper
NC_019458.2	11986296	11986396	100	7	0.1786	0.7525	-0.5739	-27.986	Hypo		NC_019459.2	104117572	104117696	124	6	0.7006	0.2021	0.4985	20.734	Hyper
NC_019458.2	42358	42417	59	10	0.1873	0.7599	-0.5726	-45.9061	Hypo		NC_019460.2	136270484	136270580	96	8	0.6622	0.1634	0.4987	36.8437	Hyper
NC_019458.2	102679586	102679658	72	4	0.1812	0.7537	-0.5725	-12.8525	Hypo		NC_019465.2	8975677	8975766	89	4	0.8308	0.332	0.4988	15.059	Hyper
NC_019460.2	19836604	19836876	272	14	0.1331	0.7055	-0.5724	-86.3031	Hypo		NC_019468.2	48992997	48993095	98	4	0.6529	0.1538	0.4991	13.7672	Hyper
NC_019460.2	105391879	105392016	137	14	0.1621	0.7337	-0.5716	-83.6821	Hypo		NC_019461.2	116258985	116259138	153	7	0.6613	0.1616	0.4997	29.1178	Hyper
NC_019466.2	14963380	14963446	66	11	0.1625	0.7341	-0.5716	-63.4477	Hypo		NC_019470.2	78301620	78301743	123	8	0.7094	0.2093	0.5001	33.091	Hyper
NC_019459.2	94897345	94897409	64	4	0.1209	0.6916	-0.5707	-13.7195	Hypo		NC_019470.2	34894964	34895016	52	5	0.6403	0.1391	0.5012	18.4529	Hyper
NC_019460.2	62142650	62142794	144	11	0.1694	0.7384	-0.5689	-58.7328	Hypo		NC_019460.2	2014240	2014336	96	9	0.7157	0.2133	0.5025	39.3765	Hyper
NC_019465.2	90201010	90201202	192	10	0.1552	0.7238	-0.5686	-53.4651	Hypo		NC_019462.2	41139741	41139872	131	10	0.7049	0.2023	0.5027	42.6155	Hyper
NC_019460.2	7472631	7472788	157	10	0.1571	0.7251	-0.568	-52.4689	Hypo		NC_019470.2	81688612	81688714	102	5	0.6253	0.1218	0.5034	21.5932	Hyper
NC_019460.2	77943183	77943540	357	11	0.2184	0.7863	-0.5679	-53.4817	Hypo		NC_019472.2	40539872	40539941	69	7	0.6695	0.1653	0.5042	28.54	Hyper
NC_019472.2	26432966	26433133	167	6	0.1885	0.7561	-0.5675	-30.1668	Hypo		NC_019468.2	47138468	47138531	63	7	0.6465	0.1415	0.5051	28.1278	Hyper
NC_019468.2	34343983	34344083	100	11	0.1928	0.7601	-0.5673	-57.429	Hypo		NC_019473.2	35701632	35701733	101	5	0.7382	0.233	0.5052	20.5183	Hyper
NC_019479.2	47183195	47183270	75	5	0.1162	0.6835	-0.5672	-22.4134	Hypo		NC_019460.2	180088432	180088491	59	5	0.6841	0.1789	0.5052	19.3203	Hyper
NC_019478.2	41406699	41406849	150	10	0.1484	0.7154	-0.567	-55.3335	Hypo		NC_019472.2	28931405	28931469	64	11	0.6926	0.1873	0.5053	49.4901	Hyper
NC_019484.2	37432603	37432944	341	8	0.0881	0.655	-0.5668	-45.3599	Hypo		NC_019474.2	46166210	46166299	89	5	0.6303	0.1227	0.5076	20.3926	Hyper
NC_019464.2	34517841	34517941	100	7	0.1227	0.689	-0.5663	-30.0976	Hypo		NC_019467.2	37783962	37784073	111	6	0.6079	0.0999	0.508	26.8416	Hyper
NC_019470.2	34100716	34100857	141	12	0.1696	0.7353	-0.5657	-65.0551	Hypo		NC_019467.2	82383720	82383933	213	11	0.6461	0.1378	0.5082	51.1951	Hyper
NC_019478.2	46199698	46200582	884	11	0.111	0.6764	-0.5654	-58.6524	Hypo		NC_019480.2	60789266	60789439	173	6	0.7463	0.2374	0.5089	25.2517	Hyper
NC_019458.2	92549404	92549554	150	7	0.188	0.7525	-0.5645	-26.8387	Hypo		NC_019479.2	43665915	43666006	91	8	0.709	0.1973	0.5117	34.6298	Hyper
NC_019462.2	72503402	72503559	157	12	0.0763	0.6408	-0.5645	-80.4107	Hypo		NC_019460.2	214863332	214863476	144	9	0.6541	0.1423	0.5119	46.0758	Hyper
NC_019474.2	11871267	11871344	77	8	0.1078	0.6721	-0.5643	-40.126	Hypo		NC_019467.2	22600189	22600306	117	9	0.6603	0.1478	0.5125	43.3959	Hyper
NC_019460.2	176341907	176342040	133	9	0.1383	0.7023	-0.564	-45.1315	Hypo		NC_019459.2	4377377	4377532	155	9	0.7506	0.2358	0.5148	38.1551	Hyper
NC_019458.2	86143436	86143570	134	5	0.1421	0.7052	-0.5632	-20.8956	Hypo		NC_019466.2	88963063	88963180	117	7	0.6449	0.129	0.5158	29.7213	Hyper
NC_019468.2	22179390	22179630	240	8	0.1236	0.6868	-0.5632	-39.1153	Hypo		NC_019470.2	41585163	41585238	75	7	0.7141	0.1979	0.5162	31.6353	Hyper
NC_019472.2	43193861	43193955	94	6	0.0934	0.6565	-0.5631	-27.9493	Hypo		NC_019465.2	36759401	36759458	57	4	0.795	0.2785	0.5166	14.334	Hyper
NC_019475.2	20341618	20341701	83	10	0.1395	0.702	-0.5626	-51.1951	Hypo		NC_019468.2	33029086	33029218	132	7	0.6582	0.1415	0.5167	29.1161	Hyper
NC_019473.2	69013279	69013391	112	4	0.0811	0.643	-0.5619	-17.2463	Hypo		NC_019472.2	21523611	21523711	100	5	0.6784	0.1607	0.5177	18.8744	Hyper
NC_019463.2	114238318	114238389	71	6	0.2378	0.7995	-0.5617	-21.9263	Hypo		NC_019463.2	115838462	115838628	166	14	0.7064	0.1885	0.5179	72.085	Hyper
NC_019460.2	8115363	8115447	84	8	0.108	0.6696	-0.5617	-41.8355	Hypo		NC_019466.2	94349973	94350029	56	6	0.7076	0.189	0.5186	20.5646	Hyper
NC_019463.2	44891820	44891954	134	9	0.2866	0.8477	-0.5611	-65.1233	Hypo		NC_019482.2	8647555	8647618	63	5	0.6217	0.1023	0.5194	22.027	Hyper
NC_019469.2	75441245	75441354	109	8	0.1383	0.6986	-0.5603	-38.5688	Hypo		NC_019472.2	72431896	72432009	113	8	0.7582	0.238	0.5203	32.8566	Hyper
NC_019473.2	71670237	71670462	225	15	0.1015	0.6615	-0.56	-99.7816	Hypo		NC_019467.2	15485529	15485696	167	10	0.673	0.1525	0.5205	46.0908	Hyper
NC_019461.2	113706538	113706651	113	10	0.1189	0.6776	-0.5586	-54.4435	Hypo		NC_019470.2	43387090	43387142	52	5	0.7394	0.2187	0.5207	16.7421	Hyper
NC_019462.2	40767069	40767159	90	5	0.1761	0.7348	-0.5586	-23.325	Hypo		NC_019470.2	41581291	41581362	71	4	0.6272	0.1041	0.5231	17.2137	Hyper
NC_019479.2	49916822	49916903	81	8	0.0778	0.6342	-0.5565	-46.7611	Hypo		NC_019459.2	7329199	7329250	51	4	0.7598	0.2348	0.525	11.6396	Hyper
NC_019481.2	68947	69058	111	14	0.0856	0.642	-0.5564	-93.0355	Hypo		NC_019481.2	21668163	21668263	100	4	0.794	0.2685	0.5255	15.2687	Hyper
NC_019473.2	3526631	3526792	161	7	0.0624	0.6187	-0.5563	-39.0175	Hypo		NC_019467.2	81535583	81535703	120	6	0.662	0.136	0.526	24.6527	Hyper
NC_019473.2	58772237	58772394	157	10	0.1176	0.6735	-0.5559	-60.5585	Hypo		NC_019459.2	248359816	248359886	70	5	0.782	0.2551	0.5268	15.6448	Hyper
NC_019462.2	54551142	54551234	92	5	0.0721	0.6278	-0.5557	-23.2094	Hypo		NC_019472.2	74050182	74050344	162	16	0.708	0.1791	0.5289	100.732	Hyper
NC_019473.2	71300479	71300616	137	7	0.0908	0.6466	-0.5557	-34.2899	Hypo		NC_019468.2	44161302	44161476	174	11	0.6515	0.1201	0.5314	54.3639	Hyper
NC_019460.2	707744	707842	98	11	0.1706	0.7262	-0.5556	-55.9952	Hypo		NC_019484.2	18580849	18580926	77	5	0.581	0.0481	0.5328	27.2677	Hyper
NC_019468.2	32710443	32710523	80	6	0.1152	0.6706	-0.5555	-28.767	Hypo		NC_019466.2	15336575	15336635	60	5	0.6908	0.1579	0.5329	16.8609	Hyper
NC_019460.2	149298162	149298278	116	7	0.0786	0.634	-0.5555	-38.7581	Hypo		NC_019465.2	74965890	74965951	61	8	0.673	0.1395	0.5335	36.971	Hyper
NC_019460.2	36193966	36194071	105	6	0.1538	0.708	-0.5542	-26.2941	Hypo		NC_019472.2	78887203	78887301	98	7	0.7148	0.1806	0.5343	29.3222	Hyper
NC_019462.2	58414162	58414228	66	4	0.0923	0.6464	-0.5541	-16.4414	Hypo		NC_019476.2	52544395	52544460	65	6	0.7442	0.2096	0.5347	21.4991	Hyper
NC_019473.2	6111063	6111201	138	4	0.0506	0.6047	-0.554	-20.1597	Hypo		NC_019459.2	116389781	116389888	107	8	0.7964	0.2606	0.5358	30.9723	Hyper
NC_019481.2	38581058	38581151	93	9	0.1922	0.7462	-0.5539	-44.1121	Hypo		NC_019462.2	43086279	43086380	101	6	0.6925	0.1561	0.5364	22.0476	Hyper
NC_019478.2	48493466	48493554	88	5	0.0975	0.6511	-0.5536	-21.8352	Hypo		NC_019462.2	44136059	44136131	72	6	0.6925	0.1561	0.5364	22.0388	Hyper
NC_019468.2	16231279	16231472	193	11	0.1033	0.6567	-0.5534	-66.4942	Hypo		NC_019465.2	84315424	84315626	202	8	0.7002	0.1633	0.5369	35.9986	Hyper
NC_019458.2	2197508	2197601	93	6	0.1785	0.7318	-0.5533	-21.1651	Hypo		NC_019460.2	204497622	204497713	91	5	0.617	0.0801	0.5369	22.7361	Hyper
NC_019460.2	219250953	219251078	125	9	0.1584	0.7117	-0.5533	-42.3191	Hypo		NC_019478.2	43527657	43527715	58	5	0.736	0.1954	0.5407	17.2482	Hyper
NC_019478.2	40128092	40128364	272	11	0.0738	0.6266	-0.5528	-74.0003	Hypo		NC_019478.2	32313837	32313934	97	5	0.736	0.1954	0.5407	17.2475	Hyper
NC_019471.2	11618136	11618215	79	4	0.1053	0.6579	-0.5526	-16.1785	Hypo		NC_019465.2	87991648	87991796	148	9	0.7117	0.1703	0.5414	47.7048	Hyper
NC_019472.2	77903179	77903277	98	7	0.1747	0.727	-0.5522	-32.6691	Hypo		NC_019459.2	243557985	243558080	95	6	0.7775	0.2342	0.5433	21.8113	Hyper
NC_019458.2	271269689	271269793	104	5	0.1668	0.7189	-0.5521	-16.8078	Hypo		NC_019460.2	172910896	172910999	103	8	0.7688	0.2254	0.5434	36.0114	Hyper
NC_019465.2	68245057	68245110	53	5	0.1084	0.6583	-0.55	-22.1305	Hypo		NC_019470.2	65294813	65294963	150	11	0.7201	0.1766	0.5435	57.094	Hyper
NC_019476.2	50470767	50470863	96	6	0.1365	0.6865	-0.55	-25.3917	Hypo		NC_019469.2	73571718	73571781	63	4	0.7243	0.1791	0.5452	12.7919	Hyper
NC_019458.2	41635740	41635844	104	5	0.16	0.7094	-0.5494	-19.858	Hypo		NC_019475.2	13353854	13353913	59	5	0.6739	0.1286	0.5453	21.3436	Hyper
NC_019468.2	34447531	34448817	1286	9	0.1346	0.684	-0.5494	-33.6412	Hypo		NC_019475.2	7686314	7686384	70	7	0.7338	0.1883	0.5455	27.5606	Hyper
NC_019480.2	58364552	58364661	109	6	0.1774	0.7262	-0.5488	-25.9758	Hypo		NC_019470.2	82363173	82363245	72	6	0.7094	0.1637	0.5457	22.4403	Hyper
NC_019481.2	37580708	37580848	140	9	0.1475	0.696	-0.5485	-42.6995	Hypo		NC_019473.2	58697665	58697716	51	7	0.7903	0.2446	0.5457	29.7933	Hyper
NC_019474.2	69906903	69907145	242	13	0.1516	0.6997	-0.5482	-76.8513	Hypo		NC_019469.2	23614125	23614269	144	5	0.6798	0.1332	0.5466	22.2851	Hyper
NC_019474.2	70688727	70688910	183	8	0.1451	0.693	-0.5479	-36.1482	Hypo		NC_019468.2	28391225	28391313	88	10	0.7622	0.215	0.5473	46.9432	Hyper
NC_019474.2	69017393	69017564	171	10	0.0793	0.6269	-0.5476	-63.0536	Hypo		NC_019472.2	45904982	45905088	106	10	0.7499	0.2022	0.5477	45.9936	Hyper
NC_019467.2	74972275	74972412	137	10	0.1022	0.6495	-0.5474	-50.4314	Hypo		NC_019466.2	1457113	1457207	94	4	0.7261	0.1784	0.5477	14.4462	Hyper
NC_019476.2	6760829	6760963	134	6	0.1972	0.7444	-0.5472	-25.266	Hypo		NC_019467.2	82882262	82882350	88	4	0.6703	0.1221	0.5482	16.4267	Hyper
NC_019483.2	40914475	40914606	131	10	0.1074	0.654	-0.5466	-57.3271	Hypo		NC_019476.2	14787567	14787650	83	5	0.7707	0.2214	0.5493	17.6031	Hyper
NC_019475.2	67400007	67401506	1499	20	0.1515	0.6979	-0.5464	-101.273	Hypo		NC_019469.2	69657929	69657988	59	8	0.7591	0.2092	0.55	33.6351	Hyper
NC_019470.2	82349794	82349900	106	10	0.1489	0.6935	-0.5447	-48.226	Hypo		NC_019463.2	115206407	115206471	64	5	0.6685	0.1184	0.5501	19.7056	Hyper
NC_019479.2	50608232	50608382	150	17	0.1275	0.6717	-0.5443	-112.526	Hypo		NC_019471.2	12130698	12130775	77	4	0.7136	0.1626	0.551	16.2738	Hyper
NC_019470.2	75428567	75428637	70	10	0.1176	0.6614	-0.5438	-54.1946	Hypo		NC_019474.2	60918910	60919041	131	7	0.7112	0.1589	0.5523	29.558	Hyper
NC_019460.2	217464648	217464776	128	10	0.1247	0.6671	-0.5424	-50.3765	Hypo		NC_019481.2	41868106	41868194	88	6	0.7326	0.1795	0.5531	23.266	Hyper
NC_019472.2	77917374	77917589	215	16	0.1654	0.7075	-0.5421	-94.5861	Hypo		NC_019470.2	1329067	1329166	99	7	0.7315	0.1783	0.5532	28.1815	Hyper
NC_019467.2	29246325	29246398	73	5	0.1338	0.6754	-0.5417	-20.4492	Hypo		NC_019467.2	81565812	81565927	115	7	0.7095	0.1554	0.5542	35.3518	Hyper
NC_019470.2	53882102	53882294	192	8	0.108	0.6492	-0.5412	-39.4478	Hypo		NC_019470.2	78712432	78712520	88	8	0.746	0.1911	0.5549	34.1041	Hyper
NC_019478.2	31285926	31285989	63	10	0.1703	0.7116	-0.5412	-45.7163	Hypo		NC_019483.2	188806	188905	99	8	0.7398	0.1848	0.555	34.1025	Hyper
NC_019472.2	80548764	80548907	143	11	0.1242	0.6646	-0.5405	-57.4308	Hypo		NC_019460.2	179579815	179579904	89	4	0.7125	0.1572	0.5553	13.4002	Hyper
NC_019474.2	64331667	64333841	2174	13	0.192	0.7322	-0.5402	-60.5357	Hypo		NC_019480.2	20019965	20020046	81	6	0.7369	0.1808	0.5561	22.8782	Hyper
NC_019463.2	68957715	68957789	74	6	0.2206	0.7605	-0.5399	-20.7605	Hypo		NC_019460.2	36127483	36127584	101	4	0.7137	0.1572	0.5564	14.3476	Hyper
NC_019468.2	59984347	59984520	173	10	0.1323	0.6719	-0.5396	-53.2663	Hypo		NC_019460.2	93267330	93267450	120	10	0.7422	0.1849	0.5572	47.6644	Hyper
NC_019460.2	3448633	3448769	136	10	0.118	0.6575	-0.5395	-58.4001	Hypo		NC_019470.2	74201496	74201631	135	12	0.7094	0.1519	0.5575	63.3411	Hyper
NC_019471.2	13490449	13490531	82	11	0.177	0.7162	-0.5392	-52.4351	Hypo		NC_019473.2	69563009	69563133	124	13	0.7099	0.1523	0.5576	85.6161	Hyper
NC_019469.2	47587279	47587394	115	7	0.1328	0.6719	-0.5391	-29.9492	Hypo		NC_019460.2	5631396	5631515	119	6	0.7125	0.1535	0.559	23.6876	Hyper
NC_019477.2	8638	9034	396	6	0.1538	0.6929	-0.539	-48.34	Hypo		NC_019460.2	8904153	8904231	78	6	0.7125	0.1535	0.559	23.6774	Hyper
NC_019468.2	14087214	14087279	65	4	0.1152	0.6536	-0.5385	-15.475	Hypo		NC_019475.2	20108887	20108975	88	5	0.7417	0.1826	0.5591	18.1104	Hyper
NC_019482.2	3849411	3849508	97	7	0.1389	0.6767	-0.5379	-30.4371	Hypo		NC_019459.2	125742482	125742576	94	6	0.8021	0.2427	0.5594	22.5005	Hyper
NC_019470.2	11586537	11586713	176	7	0.1208	0.6582	-0.5374	-31.209	Hypo		NC_019462.2	19911402	19911462	60	5	0.6747	0.115	0.5597	19.685	Hyper
NC_019481.2	41795082	41795172	90	10	0.1709	0.7075	-0.5366	-46.4162	Hypo		NC_019469.2	75096550	75096626	76	7	0.7553	0.1951	0.5602	28.833	Hyper
NC_019475.2	64848028	64848209	181	5	0.1182	0.6548	-0.5366	-21.0243	Hypo		NC_019460.2	4807128	4807219	91	8	0.7125	0.1518	0.5607	35.7983	Hyper
NC_019460.2	208571790	208571864	74	5	0.1034	0.6393	-0.536	-20.7106	Hypo		NC_019468.2	35615886	35615984	98	5	0.7365	0.1749	0.5616	18.2525	Hyper
NC_019481.2	39818378	39818478	100	8	0.1627	0.6986	-0.5359	-34.9407	Hypo		NC_019470.2	51268799	51268899	100	7	0.7669	0.205	0.5619	29.0971	Hyper
NC_019471.2	25097719	25098084	365	15	0.2619	0.7974	-0.5355	-93.5281	Hypo		NC_019481.2	29729998	29730073	75	6	0.7326	0.1707	0.5619	24.0939	Hyper
NC_019461.2	92814722	92814884	162	8	0.2586	0.7936	-0.535	-35.757	Hypo		NC_019478.2	42054192	42054249	57	5	0.736	0.1738	0.5623	18.6658	Hyper
NC_019460.2	221949189	221949308	119	9	0.1432	0.6782	-0.535	-41.2321	Hypo		NC_019460.2	7779429	7779521	92	5	0.7145	0.152	0.5625	18.9757	Hyper
NC_019460.2	216177248	216177322	74	8	0.1554	0.6902	-0.5348	-34.8267	Hypo		NC_019460.2	61455719	61456007	288	9	0.6223	0.0586	0.5637	51.7546	Hyper
NC_019470.2	78082412	78082551	139	8	0.095	0.6295	-0.5345	-40.8935	Hypo		NC_019467.2	35806450	35806548	98	7	0.7095	0.1453	0.5642	29.8909	Hyper
NC_019478.2	16689653	16689752	99	9	0.1401	0.6745	-0.5345	-39.9492	Hypo		NC_019468.2	33899875	33900000	125	15	0.7684	0.2034	0.565	89.0956	Hyper
NC_019469.2	78446951	78447149	198	10	0.1735	0.7076	-0.534	-46.0183	Hypo		NC_019469.2	63666526	63666630	104	8	0.7923	0.2268	0.5655	36.2118	Hyper
NC_019468.2	60405978	60406229	251	22	0.0841	0.618	-0.5339	-172.53	Hypo		NC_019469.2	47384983	47385084	101	5	0.7263	0.1607	0.5657	19.0244	Hyper
NC_019481.2	472927	473122	195	21	0.1406	0.6744	-0.5338	-145.763	Hypo		NC_019461.2	118592905	118592974	69	6	0.7223	0.1553	0.567	24.9329	Hyper
NC_019468.2	29300573	29300707	134	10	0.2435	0.7766	-0.5331	-45.9937	Hypo		NC_019470.2	34538325	34538460	135	5	0.7656	0.1984	0.5672	23.4473	Hyper
NC_019481.2	298199	298282	83	4	0.0532	0.5861	-0.5329	-17.2914	Hypo		NC_019464.2	83452083	83452264	181	6	0.6548	0.0871	0.5676	32.0435	Hyper
NC_019459.2	247461217	247461354	137	9	0.1343	0.6665	-0.5322	-39.9981	Hypo		NC_019476.2	49917114	49917212	98	4	0.7625	0.1945	0.568	13.8902	Hyper
NC_019466.2	16917879	16917962	83	4	0.345	0.8771	-0.5321	-14.5354	Hypo		NC_019478.2	46487396	46487608	212	6	0.8022	0.2339	0.5683	28.8836	Hyper
NC_019461.2	113381546	113381720	174	8	0.2986	0.8305	-0.5319	-37.1182	Hypo		NC_019463.2	25089478	25089555	77	4	0.7161	0.1467	0.5694	14.2644	Hyper
NC_019463.2	35812387	35812488	101	7	0.2065	0.7381	-0.5316	-25.4645	Hypo		NC_019462.2	45083147	45083324	177	5	0.7242	0.1546	0.5697	18.949	Hyper
NC_019466.2	30281218	30281316	98	5	0.175	0.7065	-0.5315	-19.4753	Hypo		NC_019465.2	85359634	85359690	56	4	0.792	0.2222	0.5698	16.0872	Hyper
NC_019459.2	219125331	219125441	110	6	0.1002	0.6315	-0.5314	-21.1902	Hypo		NC_019484.2	4869449	4869546	97	5	0.7066	0.1357	0.5709	19.8635	Hyper
NC_019462.2	6269868	6269958	90	8	0.1388	0.6701	-0.5313	-33.6966	Hypo		NC_019460.2	212497498	212497549	51	5	0.696	0.1248	0.5712	20.0341	Hyper
NC_019460.2	167348511	167348607	96	8	0.3014	0.8318	-0.5304	-37.1253	Hypo		NC_019466.2	25437331	25437428	97	8	0.7299	0.157	0.5729	42.4058	Hyper
NC_019459.2	111086263	111086364	101	6	0.1008	0.6305	-0.5298	-21.0523	Hypo		NC_019460.2	3920205	3920302	97	5	0.7422	0.169	0.5732	19.0452	Hyper
NC_019478.2	46583716	46583895	179	15	0.0766	0.606	-0.5295	-93.3871	Hypo		NC_019460.2	1901328	1901403	75	5	0.7422	0.1679	0.5743	19.081	Hyper
NC_019459.2	242486550	242486683	133	5	0.1483	0.6778	-0.5294	-17.0063	Hypo		NC_019473.2	63491907	63491984	77	5	0.7294	0.1545	0.5749	19.1113	Hyper
NC_019462.2	42762396	42762508	112	5	0.1255	0.6548	-0.5293	-19.075	Hypo		NC_019460.2	218088399	218088480	81	5	0.7557	0.1789	0.5768	19.1742	Hyper
NC_019483.2	1927488	1927606	118	11	0.2584	0.7876	-0.5292	-50.802	Hypo		NC_019470.2	65802216	65802292	76	5	0.7394	0.1622	0.5773	19.2464	Hyper
NC_019479.2	47295942	47296060	118	13	0.0973	0.6262	-0.5288	-81.2334	Hypo		NC_019462.2	43973936	43974004	68	4	0.7143	0.136	0.5783	14.7901	Hyper
NC_019463.2	113253894	113253970	76	7	0.2507	0.7794	-0.5287	-24.273	Hypo		NC_019470.2	27035961	27036068	107	4	0.6867	0.1076	0.579	18.4969	Hyper
NC_019479.2	11395480	11395610	130	10	0.1354	0.6639	-0.5285	-61.2831	Hypo		NC_019479.2	6868407	6868503	96	5	0.7214	0.1401	0.5813	20.6188	Hyper
NC_019474.2	59980501	59980701	200	26	0.1323	0.6607	-0.5284	-193.225	Hypo		NC_019471.2	39859736	39859836	100	5	0.7404	0.1572	0.5831	20.3831	Hyper
NC_019458.2	93643320	93643379	59	5	0.2731	0.8015	-0.5283	-17.5248	Hypo		NC_019482.2	35414046	35414122	76	5	0.755	0.1719	0.5831	20.3292	Hyper
NC_019481.2	2086037	2086131	94	8	0.1606	0.6888	-0.5283	-33.7177	Hypo		NC_019481.2	653333	653414	81	6	0.7326	0.1493	0.5833	26.1735	Hyper
NC_019462.2	5116771	5116976	205	17	0.1364	0.6642	-0.5279	-102.201	Hypo		NC_019471.2	25963427	25963489	62	6	0.7104	0.127	0.5834	26.2558	Hyper
NC_019474.2	65192383	65201391	9008	26	0.2297	0.7575	-0.5278	-124.117	Hypo		NC_019472.2	63772671	63772756	85	7	0.8101	0.2241	0.586	31.8514	Hyper
NC_019478.2	2582597	2582848	251	6	0.1276	0.6552	-0.5277	-27.6226	Hypo		NC_019475.2	66040946	66041045	99	7	0.7338	0.1476	0.5862	32.136	Hyper
NC_019476.2	51183690	51183828	138	10	0.1695	0.697	-0.5275	-49.836	Hypo		NC_019482.2	44075560	44075657	97	4	0.6896	0.1023	0.5873	17.6909	Hyper
NC_019469.2	49116555	49116626	71	6	0.1353	0.6625	-0.5272	-28.244	Hypo		NC_019479.2	45558322	45558383	61	7	0.7358	0.1485	0.5873	32.5381	Hyper
NC_019459.2	55274876	55275148	272	11	0.2389	0.7657	-0.5269	-57.9806	Hypo		NC_019460.2	135022715	135022815	100	5	0.7557	0.1679	0.5878	19.977	Hyper
NC_019478.2	49019174	49019467	293	17	0.1534	0.68	-0.5266	-122.912	Hypo		NC_019471.2	39478911	39479042	131	11	0.7395	0.1516	0.5879	63.8497	Hyper
NC_019478.2	27936034	27936159	125	8	0.1746	0.701	-0.5265	-34.7239	Hypo		NC_019467.2	74592811	74592895	84	7	0.7759	0.1866	0.5892	31.6737	Hyper
NC_019467.2	24925896	24925963	67	8	0.1884	0.7144	-0.5259	-33.3625	Hypo		NC_019460.2	170476687	170476788	101	5	0.7422	0.1511	0.5911	20.3152	Hyper
NC_019474.2	59530382	59530478	96	4	0.1107	0.6365	-0.5258	-15.183	Hypo		NC_019480.2	58174463	58174527	64	7	0.757	0.1657	0.5912	32.0792	Hyper
NC_019471.2	12462188	12462250	62	6	0.1173	0.6413	-0.5241	-27.0729	Hypo		NC_019464.2	70580732	70580831	99	5	0.7378	0.1447	0.5931	20.1329	Hyper
NC_019470.2	61224706	61224794	88	7	0.0964	0.6204	-0.5241	-32.0654	Hypo		NC_019467.2	74581567	74581650	83	6	0.7207	0.1258	0.595	26.676	Hyper
NC_019481.2	38955443	38955632	189	13	0.135	0.659	-0.524	-76.6232	Hypo		NC_019465.2	67708503	67708613	110	10	0.749	0.1537	0.5953	54.0288	Hyper
NC_019481.2	41176318	41177926	1608	27	0.1225	0.6458	-0.5233	-158.324	Hypo		NC_019461.2	64647268	64647323	55	4	0.7463	0.151	0.5954	15.8635	Hyper
NC_019476.2	58033444	58037648	4204	12	0.1653	0.6883	-0.5231	-48.8067	Hypo		NC_019471.2	54993959	54994027	68	4	0.7491	0.1528	0.5963	15.4921	Hyper
NC_019460.2	8273801	8273909	108	8	0.185	0.7079	-0.5229	-32.3298	Hypo		NC_019476.2	13621231	13621369	138	5	0.7296	0.1331	0.5965	23.0907	Hyper
NC_019463.2	116835707	116835774	67	4	0.2378	0.7605	-0.5227	-11.0983	Hypo		NC_019483.2	34739766	34739821	55	6	0.7814	0.1848	0.5966	26.636	Hyper
NC_019472.2	72493337	72493399	62	7	0.1603	0.6823	-0.522	-26.8418	Hypo		NC_019479.2	14812110	14812202	92	6	0.6962	0.0993	0.5969	33.5611	Hyper
NC_019481.2	10340542	10340635	93	6	0.1366	0.6585	-0.5218	-23.8841	Hypo		NC_019460.2	25955897	25955998	101	5	0.7422	0.1446	0.5976	20.8252	Hyper
NC_019475.2	13064220	13064321	101	10	0.1807	0.702	-0.5214	-43.3202	Hypo		NC_019473.2	33601624	33601690	66	5	0.7294	0.1303	0.5991	21.0243	Hyper
NC_019482.2	2833603	2833702	99	7	0.137	0.6583	-0.5213	-28.8864	Hypo		NC_019468.2	40506804	40506900	96	5	0.7057	0.1053	0.6003	24.2843	Hyper
NC_019460.2	11549927	11550020	93	6	0.1031	0.6244	-0.5213	-24.8593	Hypo		NC_019478.2	46014479	46014541	62	7	0.8236	0.2197	0.6039	34.7217	Hyper
NC_019470.2	64880757	64880829	72	4	0.0751	0.5963	-0.5212	-16.1841	Hypo		NC_019459.2	21522797	21522881	84	5	0.8385	0.2344	0.6041	20.4528	Hyper
NC_019459.2	245844422	245844544	122	5	0.0967	0.6163	-0.5196	-15.8295	Hypo		NC_019460.2	217683363	217683459	96	6	0.7125	0.1077	0.6048	30.7367	Hyper
NC_019458.2	3121458	3121542	84	9	0.164	0.6835	-0.5195	-36.9129	Hypo		NC_019469.2	48754081	48754150	69	4	0.744	0.1392	0.6049	16.7773	Hyper
NC_019462.2	106166746	106166838	92	13	0.0848	0.6042	-0.5194	-67.6692	Hypo		NC_019478.2	45374779	45374949	170	5	0.781	0.1751	0.6059	23.8586	Hyper
NC_019475.2	54840326	54840509	183	8	0.0841	0.6034	-0.5193	-37.9576	Hypo		NC_019469.2	79002322	79002420	98	8	0.7591	0.1529	0.6062	41.35	Hyper
NC_019470.2	59561943	59562011	68	5	0.1156	0.6346	-0.519	-19.41	Hypo		NC_019468.2	56054081	56054231	150	9	0.7534	0.1463	0.6071	50.9238	Hyper
NC_019479.2	44357634	44357808	174	8	0.1596	0.6783	-0.5187	-32.4604	Hypo		NC_019464.2	42320408	42320509	101	7	0.7655	0.1583	0.6072	33.9354	Hyper
NC_019476.2	50315724	50315905	181	22	0.1009	0.6196	-0.5187	-157.957	Hypo		NC_019461.2	113749380	113749457	77	6	0.7995	0.1909	0.6086	28.6263	Hyper
NC_019478.2	48588992	48589117	125	10	0.0992	0.6178	-0.5186	-51.4159	Hypo		NC_019474.2	12170337	12170422	85	4	0.7764	0.1672	0.6092	16.3646	Hyper
NC_019480.2	595544	595661	117	7	0.1046	0.6231	-0.5185	-31.6867	Hypo		NC_019474.2	9897466	9897566	100	5	0.8023	0.1914	0.6109	22.2456	Hyper
NC_019475.2	64029794	64029890	96	9	0.1721	0.6905	-0.5184	-37.328	Hypo		NC_019467.2	82622559	82626771	4212	6	0.7424	0.1314	0.611	23.2894	Hyper
NC_019460.2	1217318	1217406	88	10	0.1805	0.6988	-0.5183	-43.0066	Hypo		NC_019470.2	41620979	41621072	93	5	0.784	0.1728	0.6112	22.3025	Hyper
NC_019468.2	7003131	7003183	52	5	0.1131	0.6314	-0.5182	-19.5347	Hypo		NC_019468.2	7157730	7158096	366	12	0.748	0.1366	0.6114	69.1848	Hyper
NC_019462.2	3709635	3709765	130	13	0.1402	0.6582	-0.518	-67.653	Hypo		NC_019468.2	57840127	57840187	60	4	0.7847	0.1698	0.6149	16.7139	Hyper
NC_019476.2	57790516	57790641	125	10	0.2867	0.8047	-0.518	-44.7658	Hypo		NC_019468.2	61408241	61408354	113	11	0.8117	0.1964	0.6153	80.7053	Hyper
NC_019472.2	77398093	77398268	175	6	0.1135	0.6314	-0.5178	-24.318	Hypo		NC_019480.2	60653165	60653337	172	8	0.7557	0.1404	0.6153	44.8039	Hyper
NC_019460.2	7181509	7181627	118	6	0.1323	0.6501	-0.5178	-23.3489	Hypo		NC_019474.2	11832680	11832751	71	6	0.7792	0.1621	0.6171	30.2409	Hyper
NC_019469.2	46658974	46659104	130	9	0.1997	0.7172	-0.5176	-38.4076	Hypo		NC_019467.2	21458828	21458916	88	6	0.8002	0.1828	0.6174	27.8948	Hyper
NC_019470.2	38553274	38553444	170	11	0.156	0.6736	-0.5176	-58.5212	Hypo		NC_019482.2	1403320	1403390	70	4	0.7689	0.1501	0.6188	17.2869	Hyper
NC_019471.2	50525605	50525781	176	15	0.088	0.6048	-0.5169	-99.1599	Hypo		NC_019475.2	56537881	56537975	94	4	0.7684	0.1496	0.6188	21.403	Hyper
NC_019481.2	4087480	4087573	93	9	0.1705	0.6872	-0.5167	-37.5692	Hypo		NC_019481.2	9634460	9634549	89	4	0.7751	0.1553	0.6197	16.9952	Hyper
NC_019469.2	2097566	2097643	77	8	0.1743	0.6904	-0.5161	-32.4107	Hypo		NC_019481.2	16974002	16974092	90	4	0.7751	0.1553	0.6197	16.9952	Hyper
NC_019483.2	35577110	35577242	132	8	0.1505	0.6666	-0.516	-35.954	Hypo		NC_019467.2	51023717	51023814	97	4	0.783	0.1609	0.6221	16.7775	Hyper
NC_019464.2	13918794	13918941	147	6	0.1136	0.6292	-0.5156	-23.4199	Hypo		NC_019460.2	5007768	5007848	80	12	0.8006	0.1774	0.6232	78.8776	Hyper
NC_019462.2	9515442	9515600	158	6	0.1382	0.6528	-0.5146	-23.5973	Hypo		NC_019469.2	48988678	48988764	86	7	0.8098	0.1862	0.6237	35.8486	Hyper
NC_019459.2	226652712	226652807	95	4	0.048	0.5622	-0.5142	-14.5079	Hypo		NC_019460.2	27848195	27848260	65	4	0.7329	0.1077	0.6253	19.1225	Hyper
NC_019470.2	58314854	58314962	108	5	0.1876	0.701	-0.5134	-20.1105	Hypo		NC_019484.2	28320751	28320809	58	7	0.7927	0.1671	0.6256	37.1469	Hyper
NC_019460.2	8034547	8034615	68	9	0.1649	0.6782	-0.5133	-37.1187	Hypo		NC_019483.2	25688216	25688286	70	6	0.7814	0.155	0.6264	30.2297	Hyper
NC_019470.2	15249120	15249221	101	8	0.172	0.6852	-0.5132	-31.7185	Hypo		NC_019472.2	75239040	75239113	73	7	0.7609	0.1342	0.6267	37.9554	Hyper
NC_019462.2	4350929	4351062	133	12	0.1341	0.6473	-0.5132	-59.3067	Hypo		NC_019468.2	57591354	57591508	154	8	0.7667	0.1396	0.6271	45.558	Hyper
NC_019467.2	85443823	85444226	403	6	0.2066	0.7198	-0.5132	-19.2942	Hypo		NC_019469.2	66198261	66198354	93	6	0.8077	0.1791	0.6286	29.9538	Hyper
NC_019474.2	70641108	70641262	154	16	0.2124	0.7253	-0.5129	-85.037	Hypo		NC_019478.2	17903506	17903591	85	6	0.7869	0.1554	0.6315	31.8539	Hyper
NC_019482.2	43063431	43063539	108	10	0.1752	0.6879	-0.5126	-49.9031	Hypo		NC_019468.2	24729529	24729589	60	6	0.8132	0.1817	0.6315	30.6554	Hyper
NC_019470.2	60348729	60348812	83	5	0.1351	0.6476	-0.5126	-18.7669	Hypo		NC_019470.2	71752919	71753004	85	5	0.8239	0.1895	0.6344	24.4906	Hyper
NC_019466.2	13396238	13396342	104	12	0.2078	0.7203	-0.5125	-55.9875	Hypo		NC_019479.2	40917701	40917793	92	7	0.7398	0.0993	0.6405	47.5822	Hyper
NC_019459.2	139432319	139432456	137	10	0.1117	0.6243	-0.5125	-44.3667	Hypo		NC_019484.2	36932390	36932480	90	4	0.7826	0.1388	0.6438	18.8225	Hyper
NC_019462.2	2433166	2433274	108	11	0.1076	0.6194	-0.5118	-54.1767	Hypo		NC_019464.2	49712788	49712839	51	4	0.773	0.1265	0.6465	18.5921	Hyper
NC_019478.2	42064858	42064960	102	7	0.1644	0.676	-0.5116	-25.9738	Hypo		NC_019459.2	234868399	234868626	227	6	0.8349	0.1864	0.6485	32.76	Hyper
NC_019478.2	41646891	41646986	95	7	0.1644	0.676	-0.5116	-25.958	Hypo		NC_019462.2	107772979	107773160	181	4	0.7482	0.0993	0.6489	21.3162	Hyper
NC_019471.2	49892637	49892691	54	7	0.1538	0.6652	-0.5114	-26.5442	Hypo		NC_019476.2	6936832	6936883	51	4	0.8123	0.1619	0.6505	19.1175	Hyper
NC_019481.2	35415544	35415669	125	8	0.2411	0.7522	-0.5111	-33.9941	Hypo		NC_019484.2	118916006	118916092	86	5	0.73	0.0759	0.6542	29.9046	Hyper
NC_019461.2	102761528	102761623	95	7	0.0811	0.592	-0.5109	-35.3963	Hypo		NC_019464.2	63809942	63810021	79	5	0.8142	0.1542	0.6601	25.6738	Hyper
NC_019473.2	69987480	69987579	99	4	0.0743	0.5853	-0.5109	-15.7884	Hypo		NC_019460.2	148832950	148833050	100	5	0.8123	0.152	0.6603	27.0171	Hyper
NC_019474.2	61055287	61055461	174	6	0.3263	0.8366	-0.5104	-27.8159	Hypo		NC_019460.2	34408136	34408257	121	10	0.7422	0.0738	0.6683	81.4352	Hyper
NC_019472.2	43307247	43307324	77	7	0.1596	0.6698	-0.5103	-26.6135	Hypo		NC_019460.2	4013084	4013313	229	9	0.8292	0.1593	0.6699	66.3335	Hyper
NC_019468.2	8274490	8274597	107	8	0.1368	0.6467	-0.5099	-32.0426	Hypo		NC_019462.2	103800512	103800578	66	10	0.7641	0.0782	0.6859	88.7061	Hyper
NC_019471.2	47287211	47287392	181	28	0.2117	0.7214	-0.5097	-191.586	Hypo		NC_019462.2	16662557	16662626	69	4	0.8474	0.152	0.6955	23.5757	Hyper
NC_019475.2	13108431	13108570	139	9	0.1721	0.6816	-0.5094	-36.3146	Hypo		NC_019470.2	61284598	61284682	84	4	0.8156	0.12	0.6956	23.1285	Hyper
NC_019460.2	98299463	98299556	93	4	0.0647	0.5736	-0.5089	-16.4712	Hypo		NC_019472.2	59730279	59730364	85	4	0.8434	0.1132	0.7302	26.6121	Hyper
NC_019484.2	4148732	4148857	125	7	0.307	0.8159	-0.5088	-35.629	Hypo
NC_019472.2	80604721	80606892	2171	27	0.2367	0.7449	-0.5082	-145.815	Hypo
NC_019471.2	6513689	6513766	77	8	0.0947	0.6022	-0.5075	-36.2186	Hypo
NC_019469.2	48558497	48558566	69	4	0.1501	0.6575	-0.5075	-15.442	Hypo
NC_019465.2	83382026	83382153	127	6	0.1083	0.6157	-0.5074	-23.1082	Hypo
NC_019477.2	50479387	50482412	3025	17	0.1315	0.6386	-0.5071	-67.4259	Hypo
NC_019478.2	41615185	41616704	1519	19	0.1451	0.6518	-0.5067	-93.0935	Hypo
NC_019469.2	78783571	78783734	163	14	0.2311	0.7377	-0.5066	-75.8026	Hypo
NC_019468.2	16773712	16773804	92	15	0.1819	0.6885	-0.5066	-76.0321	Hypo
NC_019480.2	32351952	32352102	150	6	0.3121	0.8178	-0.5057	-22.8068	Hypo
NC_019478.2	28908016	28908081	65	4	0.1019	0.6075	-0.5056	-14.1561	Hypo
NC_019476.2	59530209	59530415	206	16	0.1695	0.6748	-0.5053	-91.1713	Hypo
NC_019458.2	53292896	53293001	105	5	0.1787	0.684	-0.5052	-16.3198	Hypo
NC_019478.2	49970284	49970387	103	5	0.0724	0.5776	-0.5052	-20.0461	Hypo
NC_019469.2	48142365	48142623	258	13	0.1486	0.6535	-0.5049	-65.7039	Hypo
NC_019470.2	37765717	37765807	90	8	0.1403	0.6449	-0.5047	-31.5949	Hypo
NC_019459.2	9646951	9647077	126	8	0.1432	0.6478	-0.5046	-30.4612	Hypo
NC_019481.2	26267449	26267534	85	5	0.1429	0.6473	-0.5045	-17.7122	Hypo
NC_019470.2	46342393	46342445	52	5	0.2582	0.7625	-0.5043	-17.629	Hypo
NC_019467.2	77857897	77857975	78	6	0.1367	0.6409	-0.5042	-22.2306	Hypo
NC_019478.2	29044685	29044800	115	7	0.1362	0.6402	-0.504	-26.1393	Hypo
NC_019474.2	68631417	68631529	112	7	0.1797	0.6832	-0.5035	-25.6279	Hypo
NC_019465.2	25881489	25881594	105	6	0.1126	0.6157	-0.5031	-22.69	Hypo
NC_019469.2	3618719	3618803	84	9	0.1846	0.6872	-0.5026	-35.5217	Hypo
NC_019460.2	102071890	102072175	285	22	0.1237	0.6263	-0.5026	-152.399	Hypo
NC_019468.2	21204784	21204885	101	9	0.1422	0.6446	-0.5023	-40.3741	Hypo
NC_019458.2	190072550	190072642	92	7	0.2508	0.7525	-0.5017	-22.3266	Hypo
NC_019460.2	136841229	136841291	62	8	0.1488	0.6505	-0.5017	-31.0084	Hypo
NC_019466.2	13835189	13835353	164	11	0.1745	0.6756	-0.5011	-53.5723	Hypo
NC_019469.2	47360422	47360597	175	6	0.1295	0.6305	-0.501	-22.1731	Hypo
NC_019458.2	110105126	110105178	52	6	0.3005	0.8011	-0.5006	-20.7978	Hypo
NC_019478.2	49585060	49585182	122	15	0.1295	0.63	-0.5006	-88.5352	Hypo
NC_019460.2	38613408	38613511	103	9	0.1385	0.6389	-0.5004	-41.2691	Hypo
NC_019461.2	115101359	115101456	97	7	0.1204	0.6205	-0.5001	-28.5483	Hypo
NC_019467.2	30365654	30365717	63	7	0.1623	0.6622	-0.4999	-26.6286	Hypo
NC_019468.2	48948310	48948623	313	17	0.1307	0.6304	-0.4998	-96.7122	Hypo
NC_019468.2	46499185	46499303	118	9	0.1329	0.6325	-0.4997	-40.3001	Hypo
NC_019461.2	92593876	92593970	94	7	0.3318	0.8314	-0.4996	-27.1065	Hypo
NC_019481.2	2213221	2216248	3027	16	0.1615	0.6609	-0.4993	-73.5948	Hypo
NC_019476.2	50069504	50069768	264	6	0.3107	0.8099	-0.4991	-21.928	Hypo
NC_019471.2	54351541	54351627	86	4	0.0993	0.5983	-0.499	-14.4119	Hypo
NC_019479.2	42930103	42930411	308	12	0.1212	0.6201	-0.4989	-57.5544	Hypo
NC_019483.2	35981036	35981125	89	5	0.1544	0.653	-0.4986	-17.5077	Hypo
NC_019478.2	16215681	16215735	54	9	0.175	0.6732	-0.4983	-37.2735	Hypo
NC_019468.2	56591104	56593760	2656	19	0.1175	0.6158	-0.4983	-90.0769	Hypo
NC_019462.2	57890168	57890243	75	8	0.1388	0.6369	-0.4981	-30.5261	Hypo
NC_019475.2	63330246	63330302	56	5	0.2494	0.7475	-0.4981	-16.5165	Hypo
NC_019471.2	492804	492903	99	5	0.1432	0.6412	-0.498	-16.9267	Hypo
NC_019476.2	42720514	42720641	127	12	0.1612	0.6592	-0.498	-57.15	Hypo
NC_019471.2	56249171	56249247	76	6	0.1289	0.6266	-0.4977	-21.6894	Hypo
NC_019475.2	64304945	64305148	203	20	0.1212	0.619	-0.4977	-124.162	Hypo
NC_019484.2	899941	899994	53	4	0.0896	0.5872	-0.4976	-15.6304	Hypo
NC_019478.2	47470831	47470955	124	7	0.1429	0.6402	-0.4973	-25.4066	Hypo
NC_019460.2	138063943	138064038	95	6	0.1274	0.6244	-0.497	-21.373	Hypo
NC_019471.2	13128116	13128271	155	10	0.2465	0.7433	-0.4968	-39.934	Hypo
NC_019469.2	48707358	48707444	86	6	0.1735	0.67	-0.4966	-20.6829	Hypo
NC_019467.2	12350489	12350585	96	8	0.1739	0.6705	-0.4966	-30.407	Hypo
NC_019460.2	1450885	1451878	993	20	0.205	0.7009	-0.496	-92.2258	Hypo
NC_019482.2	30729701	30729801	100	5	0.0951	0.5909	-0.4958	-19.543	Hypo
NC_019471.2	4388878	4388974	96	5	0.0886	0.5843	-0.4957	-18.6046	Hypo
NC_019459.2	236560631	236560734	103	8	0.1257	0.6214	-0.4957	-27.8257	Hypo
NC_019467.2	54724526	54724627	101	6	0.1735	0.6689	-0.4953	-21.6171	Hypo
NC_019462.2	4877095	4877212	117	7	0.1019	0.597	-0.4952	-27.1293	Hypo
NC_019478.2	45945012	45945099	87	7	0.0627	0.5579	-0.4952	-30.0654	Hypo
NC_019481.2	2201355	2205799	4444	22	0.1221	0.6172	-0.4952	-127.406	Hypo
NC_019460.2	102463782	102463882	100	8	0.1951	0.6902	-0.4952	-29.2465	Hypo
NC_019471.2	51778397	51778463	66	7	0.1701	0.6652	-0.4951	-24.8144	Hypo
NC_019458.2	86473087	86473247	160	9	0.1425	0.6376	-0.4951	-39.4617	Hypo
NC_019462.2	41976011	41976113	102	6	0.1164	0.6115	-0.4951	-21.4481	Hypo
NC_019476.2	58340208	58340280	72	6	0.1422	0.6374	-0.4951	-24.5964	Hypo
NC_019475.2	20875007	20875093	86	6	0.1328	0.6277	-0.4949	-21.0899	Hypo
NC_019462.2	14647167	14647241	74	6	0.1131	0.6076	-0.4945	-22.1502	Hypo
NC_019483.2	13545875	13545998	123	7	0.1222	0.6161	-0.4939	-31.1222	Hypo
NC_019479.2	47177692	47177815	123	10	0.1196	0.6133	-0.4937	-43.1775	Hypo
NC_019463.2	111368757	111368878	121	5	0.1542	0.6475	-0.4933	-18.0669	Hypo
NC_019468.2	12975319	12975389	70	7	0.1668	0.6598	-0.493	-24.7525	Hypo
NC_019475.2	20466045	20466105	60	4	0.0836	0.5765	-0.4929	-14.9532	Hypo
NC_019481.2	1003546	1006340	2794	8	0.1749	0.6674	-0.4924	-30.7864	Hypo
NC_019460.2	222316764	222316885	121	13	0.1547	0.6471	-0.4924	-63.4934	Hypo
NC_019467.2	35932434	35932538	104	9	0.0947	0.5871	-0.4924	-45.0245	Hypo
NC_019470.2	82643143	82643242	99	4	0.2768	0.7691	-0.4923	-15.7767	Hypo
NC_019468.2	54127317	54127456	139	8	0.1282	0.6204	-0.4923	-31.6363	Hypo
NC_019482.2	10217475	10217631	156	15	0.096	0.5882	-0.4922	-88.6201	Hypo
NC_019479.2	43402195	43402268	73	6	0.1196	0.6118	-0.4922	-21.8584	Hypo
NC_019475.2	7040477	7040617	140	12	0.1359	0.6277	-0.4919	-56.04	Hypo
NC_019476.2	4901231	4901397	166	35	0.0774	0.5693	-0.4919	-366.183	Hypo
NC_019471.2	10589058	10589124	66	6	0.1348	0.6266	-0.4918	-20.7235	Hypo
NC_019467.2	16888567	16888658	91	8	0.1484	0.6401	-0.4917	-30.6218	Hypo
NC_019480.2	61896157	61896212	55	5	0.0837	0.5749	-0.4912	-20.0256	Hypo
NC_019471.2	58682757	58682850	93	6	0.1355	0.6266	-0.4911	-20.6945	Hypo
NC_019461.2	116420719	116420811	92	7	0.1337	0.6248	-0.4911	-31.515	Hypo
NC_019475.2	54733037	54733094	57	6	0.1392	0.63	-0.4909	-23.893	Hypo
NC_019471.2	11142229	11142309	80	6	0.1358	0.6266	-0.4908	-20.9301	Hypo
NC_019482.2	14807894	14807994	100	4	0.3286	0.8192	-0.4906	-14.5154	Hypo
NC_019462.2	34789041	34789164	123	12	0.1504	0.6408	-0.4904	-54.4126	Hypo
NC_019475.2	63678476	63678563	87	11	0.0879	0.5782	-0.4903	-46.7042	Hypo
NC_019481.2	41371738	41371868	130	8	0.0959	0.5861	-0.4902	-35.8881	Hypo
NC_019472.2	72839409	72839479	70	5	0.1554	0.6455	-0.4901	-16.6292	Hypo
NC_019462.2	49866972	49867169	197	17	0.1521	0.6415	-0.4894	-96.0976	Hypo
NC_019480.2	3470220	3470304	84	9	0.2002	0.6892	-0.489	-34.124	Hypo
NC_019463.2	92847033	92847131	98	5	0.2228	0.7117	-0.4889	-16.1081	Hypo
NC_019458.2	247876207	247876336	129	8	0.1788	0.6673	-0.4885	-28.943	Hypo
NC_019475.2	25656239	25656332	93	6	0.1392	0.6277	-0.4885	-20.9651	Hypo
NC_019468.2	31506115	31506182	67	10	0.1283	0.6167	-0.4884	-48.4642	Hypo
NC_019475.2	56446499	56446627	128	9	0.1653	0.6537	-0.4884	-37.6737	Hypo
NC_019464.2	85261867	85262216	349	20	0.1214	0.6095	-0.4882	-120.281	Hypo
NC_019478.2	41610678	41610772	94	4	0.1018	0.5901	-0.4882	-13.5287	Hypo
NC_019460.2	17525251	17525325	74	8	0.1623	0.6505	-0.4882	-29.2801	Hypo
NC_019463.2	112534547	112534613	66	5	0.1747	0.6628	-0.4881	-20.8576	Hypo
NC_019459.2	3055520	3055620	100	7	0.1212	0.6093	-0.4881	-22.3062	Hypo
NC_019459.2	248370026	248370133	107	6	0.1434	0.6315	-0.4881	-17.7605	Hypo
NC_019470.2	51810305	51810388	83	7	0.1704	0.6582	-0.4878	-24.3928	Hypo
NC_019460.2	8812621	8812849	228	14	0.2644	0.752	-0.4876	-80.1944	Hypo
NC_019471.2	13664040	13664136	96	8	0.1357	0.6228	-0.4872	-33.2412	Hypo
NC_019481.2	35936315	35936426	111	6	0.096	0.5826	-0.4866	-26.9783	Hypo
NC_019480.2	58559203	58559329	126	16	0.1701	0.6566	-0.4865	-86.7017	Hypo
NC_019475.2	30432995	30433048	53	7	0.1286	0.6149	-0.4862	-26.0106	Hypo
NC_019460.2	2882469	2884622	2153	19	0.1355	0.6217	-0.4862	-103.203	Hypo
NC_019469.2	77933731	77933877	146	11	0.2261	0.7121	-0.486	-48.1164	Hypo
NC_019461.2	95886099	95886192	93	8	0.1605	0.6464	-0.4859	-34.5228	Hypo
NC_019478.2	36042759	36048209	5450	22	0.073	0.5589	-0.4859	-111.605	Hypo
NC_019484.2	76811884	76812074	190	11	0.1539	0.6397	-0.4857	-68.3744	Hypo
NC_019460.2	216167377	216167472	95	6	0.139	0.6244	-0.4854	-20.8269	Hypo
NC_019467.2	85777399	85777498	99	7	0.1768	0.6622	-0.4854	-24.8099	Hypo
NC_019459.2	37815563	37815626	63	4	0.1483	0.6337	-0.4854	-12.9709	Hypo
NC_019462.2	4380162	4380592	430	10	0.1278	0.6131	-0.4853	-38.8985	Hypo
NC_019471.2	5716539	5719037	2498	15	0.1774	0.6625	-0.4851	-62.7421	Hypo
NC_019471.2	25080815	25080872	57	10	0.1773	0.6621	-0.4849	-45.3013	Hypo
NC_019482.2	43111209	43111349	140	16	0.1865	0.6711	-0.4846	-84.5704	Hypo
NC_019478.2	47283134	47283318	184	13	0.1081	0.5926	-0.4846	-74.9832	Hypo
NC_019476.2	48565629	48565783	154	14	0.1477	0.6321	-0.4844	-83.4042	Hypo
NC_019476.2	17405219	17405319	100	7	0.2126	0.6967	-0.484	-23.7603	Hypo
NC_019478.2	39468377	39468463	86	10	0.1519	0.6358	-0.4839	-41.5604	Hypo
NC_019460.2	16674107	16674189	82	6	0.1208	0.6041	-0.4832	-24.4914	Hypo
NC_019478.2	33114223	33114323	100	7	0.1212	0.6042	-0.4831	-26.0295	Hypo
NC_019471.2	53436965	53437089	124	17	0.1404	0.6235	-0.483	-87.5345	Hypo
NC_019469.2	44633104	44633163	59	4	0.1735	0.6564	-0.483	-16.0996	Hypo
NC_019461.2	4476544	4476658	114	8	0.1444	0.6275	-0.483	-34.1106	Hypo
NC_019476.2	16519159	16519214	55	6	0.186	0.6689	-0.4829	-19.8255	Hypo
NC_019478.2	48974247	48974389	142	12	0.0843	0.567	-0.4827	-61.2712	Hypo
NC_019475.2	27990560	27990819	259	12	0.1076	0.5902	-0.4826	-62.3726	Hypo
NC_019475.2	66379409	66380185	776	10	0.1459	0.6284	-0.4824	-43.9021	Hypo
NC_019459.2	245544029	245544084	55	8	0.1654	0.6478	-0.4823	-27.6236	Hypo
NC_019470.2	82596352	82596459	107	6	0.1682	0.6503	-0.4822	-19.6177	Hypo
NC_019470.2	62084640	62084873	233	8	0.1111	0.5932	-0.4821	-31.1603	Hypo
NC_019479.2	49171253	49171355	102	7	0.1154	0.5974	-0.482	-32.0728	Hypo
NC_019459.2	782720	782885	165	7	0.1107	0.5927	-0.482	-23.9074	Hypo
NC_019466.2	15174552	15174747	195	12	0.1146	0.5965	-0.4819	-69.2771	Hypo
NC_019460.2	223567526	223567615	89	6	0.2165	0.6984	-0.4818	-22.3492	Hypo
NC_019483.2	26503	26593	90	6	0.3009	0.7826	-0.4817	-19.6936	Hypo
NC_019465.2	67165269	67165363	94	6	0.1598	0.6415	-0.4816	-22.9563	Hypo
NC_019480.2	24952731	24952823	92	7	0.1921	0.6738	-0.4816	-24.0771	Hypo
NC_019478.2	5458316	5458369	53	5	0.0964	0.5776	-0.4813	-17.3762	Hypo
NC_019476.2	17784527	17784655	128	7	0.1684	0.6495	-0.481	-24.0758	Hypo
NC_019484.2	810027	810235	208	17	0.1461	0.6269	-0.4809	-104.236	Hypo
NC_019472.2	54536036	54536183	147	9	0.1383	0.619	-0.4807	-38.1881	Hypo
NC_019475.2	5724750	5724899	149	10	0.2052	0.6859	-0.4807	-42.1172	Hypo
NC_019459.2	247731599	247731651	52	6	0.1868	0.6675	-0.4807	-18.9854	Hypo
NC_019463.2	103868562	103868800	238	9	0.1747	0.655	-0.4802	-38.4155	Hypo
NC_019481.2	39095186	39098830	3644	19	0.1277	0.6079	-0.4802	-98.179	Hypo
NC_019471.2	18814397	18814514	117	4	0.1182	0.5983	-0.4801	-14.1847	Hypo
NC_019460.2	412644	412742	98	6	0.145	0.6244	-0.4795	-19.8886	Hypo
NC_019460.2	209658914	209659004	90	7	0.2392	0.7185	-0.4793	-23.5731	Hypo
NC_019474.2	68916644	68916722	78	6	0.1662	0.6452	-0.479	-19.5631	Hypo
NC_019461.2	112897012	112897200	188	10	0.0581	0.5365	-0.4784	-54.8001	Hypo
NC_019467.2	84014247	84014524	277	18	0.1721	0.6505	-0.4784	-97.7985	Hypo
NC_019483.2	37080357	37080661	304	13	0.1438	0.6218	-0.478	-60.1931	Hypo
NC_019474.2	55181171	55181353	182	14	0.2951	0.7727	-0.4776	-64.8906	Hypo
NC_019462.2	5494637	5494734	97	14	0.1482	0.6258	-0.4776	-69.5849	Hypo
NC_019474.2	64807640	64807734	94	7	0.1567	0.634	-0.4773	-24.0326	Hypo
NC_019470.2	41151401	41151477	76	6	0.1418	0.6191	-0.4773	-19.827	Hypo
NC_019475.2	31198449	31198548	99	6	0.1618	0.6388	-0.477	-19.6028	Hypo
NC_019471.2	56431594	56432118	524	18	0.1167	0.5935	-0.4769	-85.7355	Hypo
NC_019459.2	245792947	245792998	51	7	0.1326	0.6093	-0.4767	-21.3519	Hypo
NC_019468.2	44309589	44309782	193	9	0.0787	0.5552	-0.4765	-44.1373	Hypo
NC_019458.2	6376221	6376319	98	5	0.2047	0.6811	-0.4763	-15.8358	Hypo
NC_019474.2	68794821	68794987	166	18	0.0771	0.5534	-0.4762	-116.751	Hypo
NC_019478.2	47542400	47542544	144	8	0.1039	0.5801	-0.4762	-36.4676	Hypo
NC_019481.2	41714940	41715071	131	13	0.1238	0.5999	-0.4761	-64.1844	Hypo
NC_019466.2	13671187	13671245	58	7	0.1539	0.6294	-0.4755	-25.4612	Hypo
NC_019466.2	15386741	15386806	65	6	0.1655	0.6411	-0.4755	-20.8254	Hypo
NC_019461.2	23023450	23023552	102	4	0.3725	0.8475	-0.4751	-15.0361	Hypo
NC_019458.2	269175500	269175567	67	6	0.2796	0.7547	-0.475	-22.667	Hypo
NC_019480.2	3227995	3228049	54	5	0.305	0.7799	-0.4749	-15.8556	Hypo
NC_019459.2	114039049	114039161	112	7	0.1117	0.5855	-0.4738	-23.7211	Hypo
NC_019460.2	7055283	7055467	184	9	0.2186	0.6922	-0.4736	-38.9191	Hypo
NC_019473.2	3190924	3191022	98	4	0.0988	0.5723	-0.4734	-15.3835	Hypo
NC_019476.2	45394606	45394664	58	8	0.3639	0.8372	-0.4733	-28.9279	Hypo
NC_019460.2	3297291	3297402	111	7	0.138	0.6112	-0.4732	-24.1657	Hypo
NC_019476.2	35288570	35288679	109	7	0.1128	0.5856	-0.4728	-26.341	Hypo
NC_019458.2	36197450	36197514	64	7	0.1675	0.6402	-0.4727	-25.7765	Hypo
NC_019475.2	16059870	16059923	53	6	0.2732	0.7456	-0.4724	-18.9904	Hypo
NC_019482.2	7855188	7855256	68	5	0.3261	0.7983	-0.4723	-19.3294	Hypo
NC_019463.2	114547279	114547524	245	7	0.2383	0.7106	-0.4723	-23.4505	Hypo
NC_019472.2	53653713	53653811	98	7	0.1468	0.6189	-0.4721	-23.9065	Hypo
NC_019458.2	99910671	99910800	129	8	0.2187	0.6906	-0.4719	-25.4082	Hypo
NC_019460.2	133946754	133946925	171	4	0.1059	0.5778	-0.4719	-14.3562	Hypo
NC_019468.2	60650021	60650097	76	6	0.0755	0.5471	-0.4716	-22.7276	Hypo
NC_019460.2	33217	33301	84	17	0.2213	0.6919	-0.4706	-81.4361	Hypo
NC_019468.2	42661003	42662298	1295	9	0.1245	0.5949	-0.4704	-34.0302	Hypo
NC_019469.2	60076699	60076750	51	4	0.1386	0.6089	-0.4703	-12.0457	Hypo
NC_019480.2	58328522	58328826	304	14	0.1444	0.6145	-0.4701	-67.0214	Hypo
NC_019460.2	207214384	207214480	96	4	0.1077	0.5778	-0.4701	-12.4897	Hypo
NC_019474.2	68180588	68180658	70	7	0.0901	0.5601	-0.47	-30.2954	Hypo
NC_019481.2	40639406	40639480	74	10	0.1985	0.6683	-0.4698	-42.2501	Hypo
NC_019484.2	11704596	11704694	98	4	0.1177	0.5872	-0.4695	-13.3341	Hypo
NC_019464.2	81581248	81581364	116	8	0.1328	0.602	-0.4692	-31.9322	Hypo
NC_019478.2	28872403	28872517	114	6	0.0796	0.5488	-0.4692	-24.2443	Hypo
NC_019468.2	23192327	23192420	93	5	0.0907	0.5597	-0.469	-16.7671	Hypo
NC_019471.2	60451744	60451940	196	10	0.1483	0.6171	-0.4688	-46.5472	Hypo
NC_019460.2	62868525	62868747	222	11	0.0579	0.5261	-0.4682	-66.6954	Hypo
NC_019478.2	47052286	47052431	145	14	0.1064	0.5745	-0.4681	-77.0886	Hypo
NC_019463.2	115123610	115123841	231	19	0.3912	0.859	-0.4678	-94.5885	Hypo
NC_019479.2	44944744	44944891	147	13	0.1351	0.6028	-0.4677	-66.9665	Hypo
NC_019462.2	4166801	4166898	97	7	0.1295	0.597	-0.4675	-23.6925	Hypo
NC_019478.2	47295174	47295270	96	10	0.1838	0.6511	-0.4673	-38.5996	Hypo
NC_019481.2	39484257	39484315	58	5	0.3146	0.7819	-0.4673	-18.4873	Hypo
NC_019474.2	65035908	65036044	136	10	0.1578	0.625	-0.4672	-48.4627	Hypo
NC_019461.2	113319934	113320074	140	11	0.1783	0.6455	-0.4672	-50.3685	Hypo
NC_019468.2	33982397	33982563	166	10	0.2051	0.6722	-0.4672	-40.089	Hypo
NC_019466.2	76454900	76454976	76	4	0.1382	0.6052	-0.467	-13.6315	Hypo
NC_019476.2	6449803	6449902	99	6	0.1257	0.5926	-0.4669	-20.4594	Hypo
NC_019474.2	70832619	70832764	145	11	0.1776	0.6445	-0.4668	-48.485	Hypo
NC_019468.2	53660652	53660711	59	9	0.1252	0.592	-0.4668	-39.4362	Hypo
NC_019472.2	41516311	41516407	96	11	0.1992	0.6659	-0.4667	-43.7618	Hypo
NC_019471.2	12077386	12077470	84	8	0.1357	0.6022	-0.4666	-28.4347	Hypo
NC_019478.2	42285203	42285304	101	11	0.1776	0.6442	-0.4666	-43.4644	Hypo
NC_019459.2	50532431	50532522	91	7	0.1261	0.5927	-0.4665	-22.4826	Hypo
NC_019481.2	38979594	38979690	96	8	0.1544	0.6208	-0.4664	-33.1479	Hypo
NC_019459.2	159592916	159592992	76	4	0.1426	0.6089	-0.4664	-12.5365	Hypo
NC_019465.2	10566057	10566430	373	15	0.1774	0.6437	-0.4662	-95.6512	Hypo
NC_019470.2	80303481	80304875	1394	28	0.1184	0.5845	-0.4661	-154.109	Hypo
NC_019460.2	1629544	1629930	386	30	0.1496	0.6156	-0.466	-182.572	Hypo
NC_019478.2	47825906	47826000	94	13	0.1483	0.6142	-0.4659	-59.3603	Hypo
NC_019478.2	43299765	43299985	220	13	0.1891	0.655	-0.4659	-55.4628	Hypo
NC_019478.2	24782726	24782882	156	7	0.1841	0.65	-0.4659	-26.7782	Hypo
NC_019478.2	48354287	48354621	334	14	0.1288	0.5946	-0.4658	-70.6895	Hypo
NC_019478.2	33591643	33591722	79	8	0.1243	0.5901	-0.4657	-32.6453	Hypo
NC_019478.2	45674821	45674884	63	5	0.1855	0.6511	-0.4656	-17.5493	Hypo
NC_019476.2	59430279	59430512	233	18	0.2761	0.7416	-0.4655	-95.563	Hypo
NC_019474.2	70888104	70888206	102	7	0.1829	0.6482	-0.4653	-26.3404	Hypo
NC_019483.2	35511019	35511115	96	7	0.1335	0.5987	-0.4652	-27.0932	Hypo
NC_019466.2	16394693	16396627	1934	14	0.2336	0.6984	-0.4648	-47.7267	Hypo
NC_019471.2	12548033	12548180	147	5	0.1578	0.6224	-0.4647	-16.0417	Hypo
NC_019469.2	39488197	39488341	144	5	0.2434	0.7077	-0.4644	-18.3826	Hypo
NC_019471.2	571523	571633	110	12	0.1905	0.6548	-0.4642	-48.524	Hypo
NC_019467.2	35436244	35436437	193	11	0.1815	0.6455	-0.464	-45.0954	Hypo
NC_019481.2	34487302	34487377	75	5	0.1092	0.573	-0.4638	-16.0959	Hypo
NC_019470.2	57604788	57604908	120	8	0.095	0.5585	-0.4635	-37.3499	Hypo
NC_019472.2	52592709	52592808	99	10	0.1482	0.6117	-0.4635	-44.8078	Hypo
NC_019475.2	20808027	20808085	58	7	0.1516	0.6149	-0.4632	-22.9812	Hypo
NC_019480.2	55587719	55587802	83	6	0.1617	0.6248	-0.4631	-22.0731	Hypo
NC_019471.2	18850406	18850500	94	5	0.1032	0.5662	-0.463	-15.7905	Hypo
NC_019478.2	32304747	32304843	96	9	0.1616	0.6246	-0.463	-33.9317	Hypo
NC_019479.2	48642554	48642639	85	5	0.1069	0.5696	-0.4627	-16.5151	Hypo
NC_019476.2	55090883	55090988	105	11	0.2336	0.6962	-0.4626	-43.9727	Hypo
NC_019465.2	29523646	29523698	52	6	0.2949	0.7571	-0.4622	-22.024	Hypo
NC_019468.2	45317683	45317802	119	8	0.1332	0.5952	-0.4621	-28.2249	Hypo
NC_019460.2	11272535	11272659	124	27	0.3266	0.7884	-0.4619	-152.746	Hypo
NC_019462.2	59405616	59405707	91	10	0.1544	0.6161	-0.4618	-39.0017	Hypo
NC_019478.2	47604496	47604724	228	17	0.1736	0.6353	-0.4618	-88.0919	Hypo
NC_019460.2	2082842	2086420	3578	22	0.2395	0.7013	-0.4618	-90.4325	Hypo
NC_019458.2	105265264	105265378	114	10	0.1939	0.6556	-0.4617	-36.6589	Hypo
NC_019481.2	9378202	9378288	86	5	0.1366	0.5981	-0.4614	-17.0263	Hypo
NC_019462.2	16818554	16818679	125	11	0.0917	0.553	-0.4613	-47.1505	Hypo
NC_019469.2	44922475	44922664	189	9	0.1182	0.5792	-0.461	-37.3797	Hypo
NC_019478.2	43907999	43908120	121	14	0.3507	0.8117	-0.461	-62.8311	Hypo
NC_019484.2	25109557	25109698	141	7	0.0688	0.5298	-0.461	-34.3305	Hypo
NC_019467.2	12465598	12465705	107	8	0.2098	0.6709	-0.461	-33.304	Hypo
NC_019467.2	75532991	75533199	208	15	0.1541	0.615	-0.4609	-82.1404	Hypo
NC_019471.2	59343640	59343807	167	12	0.1659	0.6266	-0.4607	-50.7536	Hypo
NC_019460.2	223095641	223095732	91	8	0.139	0.5995	-0.4605	-27.9815	Hypo
NC_019476.2	55748972	55749201	229	9	0.1543	0.6147	-0.4604	-37.8512	Hypo
NC_019462.2	46379648	46379700	52	5	0.0708	0.5312	-0.4603	-21.1364	Hypo
NC_019463.2	97430389	97430469	80	8	0.2014	0.6614	-0.46	-27.8064	Hypo
NC_019469.2	60944264	60944350	86	6	0.1735	0.6334	-0.4599	-18.2981	Hypo
NC_019462.2	42563564	42563626	62	11	0.1028	0.5625	-0.4597	-53.3749	Hypo
NC_019483.2	212155	212366	211	11	0.1852	0.6448	-0.4596	-44.7689	Hypo
NC_019479.2	18605792	18605891	99	9	0.159	0.6183	-0.4594	-34.1791	Hypo
NC_019475.2	17346829	17346896	67	4	0.1215	0.5808	-0.4593	-11.7631	Hypo
NC_019460.2	94908267	94908337	70	11	0.2013	0.6604	-0.4591	-42.8818	Hypo
NC_019460.2	6750812	6750953	141	11	0.2013	0.6604	-0.4591	-42.8817	Hypo
NC_019460.2	973749	973804	55	9	0.1807	0.6393	-0.4587	-36.212	Hypo
NC_019484.2	1160971	1161144	173	13	0.099	0.5576	-0.4585	-70.0465	Hypo
NC_019481.2	33809173	33809298	125	9	0.1463	0.6044	-0.4581	-37.3863	Hypo
NC_019480.2	59216765	59216858	93	7	0.1801	0.6382	-0.4581	-27.7816	Hypo
NC_019458.2	273331998	273332169	171	16	0.2292	0.687	-0.4578	-68.513	Hypo
NC_019463.2	114845714	114845921	207	26	0.2764	0.7341	-0.4577	-140.978	Hypo
NC_019466.2	16502233	16502327	94	9	0.1518	0.6094	-0.4576	-34.8688	Hypo
NC_019478.2	27887948	27888020	72	7	0.1746	0.6321	-0.4575	-26.1348	Hypo
NC_019460.2	31041880	31041959	79	4	0.1202	0.5778	-0.4575	-11.9149	Hypo
NC_019463.2	116185661	116185750	89	14	0.2652	0.7224	-0.4573	-54.6931	Hypo
NC_019474.2	61655356	61657733	2377	16	0.2549	0.7121	-0.4572	-67.1545	Hypo
NC_019480.2	3145585	3145716	131	10	0.0962	0.5534	-0.4572	-48.5828	Hypo
NC_019458.2	109319678	109319867	189	10	0.1633	0.6204	-0.4571	-39.7637	Hypo
NC_019460.2	5036195	5036296	101	5	0.1248	0.5818	-0.457	-15.6785	Hypo
NC_019478.2	1938530	1938836	306	7	0.0624	0.519	-0.4566	-32.653	Hypo
NC_019461.2	118357619	118357718	99	12	0.0864	0.543	-0.4565	-66.5402	Hypo
NC_019470.2	10443162	10443299	137	7	0.0839	0.5405	-0.4565	-29.3704	Hypo
NC_019468.2	60469110	60469288	178	6	0.1645	0.6208	-0.4563	-23.076	Hypo
NC_019475.2	27887	28044	157	12	0.2108	0.6671	-0.4563	-63.2874	Hypo
NC_019467.2	34792941	34793123	182	14	0.1975	0.6538	-0.4563	-59.4555	Hypo
NC_019462.2	50326630	50326728	98	9	0.0487	0.505	-0.4562	-39.1124	Hypo
NC_019458.2	570416	570522	106	9	0.1884	0.6441	-0.4557	-30.3366	Hypo
NC_019460.2	7906090	7906258	168	12	0.1919	0.6474	-0.4555	-50.1618	Hypo
NC_019469.2	47319107	47319235	128	14	0.3357	0.7904	-0.4547	-61.482	Hypo
NC_019458.2	102652027	102652219	192	18	0.1356	0.5899	-0.4543	-102.632	Hypo
NC_019478.2	46322133	46322231	98	7	0.1429	0.5971	-0.4542	-24.7989	Hypo
NC_019481.2	32550011	32550130	119	12	0.1466	0.6007	-0.4542	-50.1028	Hypo
NC_019465.2	84177614	84177787	173	5	0.1775	0.6316	-0.4541	-14.5801	Hypo
NC_019473.2	71475340	71475553	213	21	0.1459	0.5997	-0.4539	-113.321	Hypo
NC_019477.2	48231896	48231969	73	9	0.1599	0.6137	-0.4538	-30.2309	Hypo
NC_019473.2	66312364	66315036	2672	24	0.2342	0.6877	-0.4535	-111.461	Hypo
NC_019478.2	1982317	1982410	93	5	0.3264	0.7796	-0.4532	-15.4569	Hypo
NC_019460.2	1852935	1853131	196	10	0.1517	0.6049	-0.4532	-38.7953	Hypo
NC_019460.2	106546875	106546961	86	4	0.1651	0.6182	-0.4531	-20.527	Hypo
NC_019462.2	13522125	13522299	174	14	0.2315	0.6844	-0.4529	-64.9302	Hypo
NC_019473.2	9619506	9619746	240	11	0.279	0.7317	-0.4527	-47.8478	Hypo
NC_019479.2	44082416	44082517	101	10	0.1757	0.6281	-0.4524	-37.3955	Hypo
NC_019458.2	28496009	28496106	97	6	0.2171	0.6693	-0.4522	-21.1978	Hypo
NC_019473.2	3540357	3540852	495	22	0.1051	0.5568	-0.4517	-115.344	Hypo
NC_019471.2	559149	559224	75	9	0.1449	0.5965	-0.4516	-36.6561	Hypo
NC_019469.2	68657940	68658024	84	7	0.1418	0.5934	-0.4516	-25.2864	Hypo
NC_019482.2	27274945	27275226	281	17	0.161	0.6125	-0.4515	-100.4	Hypo
NC_019472.2	31572887	31573006	119	11	0.1539	0.605	-0.4511	-43.3157	Hypo
NC_019480.2	39994406	39994665	259	7	0.1077	0.5581	-0.4504	-33.518	Hypo
NC_019474.2	44580448	44580582	134	7	0.1958	0.6458	-0.45	-27.091	Hypo
NC_019459.2	146342967	146343053	86	5	0.1006	0.5503	-0.4497	-16.5325	Hypo
NC_019472.2	78427318	78427437	119	12	0.2121	0.6616	-0.4495	-54.511	Hypo
NC_019460.2	205451660	205451748	88	5	0.1053	0.5544	-0.4491	-20.5253	Hypo
NC_019483.2	806387	806482	95	8	0.3111	0.7601	-0.449	-25.5546	Hypo
NC_019462.2	5290599	5290723	124	9	0.053	0.502	-0.4489	-47.0791	Hypo
NC_019471.2	10204308	10204549	241	8	0.2676	0.7161	-0.4485	-37.4884	Hypo
NC_019460.2	217841715	217841841	126	11	0.1649	0.6133	-0.4485	-45.8694	Hypo
NC_019480.2	1259349	1259462	113	6	0.0982	0.5465	-0.4483	-22.5951	Hypo
NC_019464.2	5867852	5867986	134	8	0.1089	0.5569	-0.4481	-30.3871	Hypo
NC_019459.2	51484285	51484365	80	11	0.1904	0.6384	-0.448	-38.7961	Hypo
NC_019481.2	1984415	1984910	495	13	0.123	0.5709	-0.4479	-60.9691	Hypo
NC_019471.2	1962872	1962927	55	6	0.1701	0.6179	-0.4478	-21.5235	Hypo
NC_019460.2	11466377	11466596	219	7	0.138	0.5859	-0.4478	-24.8836	Hypo
NC_019459.2	127584494	127584561	67	9	0.2062	0.654	-0.4478	-30.2577	Hypo
NC_019466.2	39535271	39535359	88	8	0.1713	0.6189	-0.4476	-27.4888	Hypo
NC_019480.2	61666234	61666324	90	7	0.1762	0.6231	-0.4469	-21.6915	Hypo
NC_019460.2	154689769	154689954	185	25	0.1278	0.5744	-0.4466	-178.385	Hypo
NC_019470.2	56144169	56144258	89	10	0.1765	0.6229	-0.4464	-36.9107	Hypo
NC_019474.2	11501429	11501506	77	7	0.0623	0.5086	-0.4463	-41.0682	Hypo
NC_019460.2	317407	317488	81	15	0.2919	0.738	-0.4461	-62.466	Hypo
NC_019466.2	15093548	15093844	296	13	0.2801	0.7251	-0.445	-69.7374	Hypo
NC_019470.2	77542159	77542374	215	14	0.1052	0.5501	-0.4449	-74.8977	Hypo
NC_019469.2	69630740	69630997	257	14	0.1462	0.591	-0.4448	-68.0998	Hypo
NC_019461.2	96367377	96367441	64	6	0.1495	0.5943	-0.4448	-20.2569	Hypo
NC_019468.2	44700732	44700830	98	8	0.1648	0.6094	-0.4446	-29.9281	Hypo
NC_019478.2	41520437	41520867	430	28	0.2326	0.6772	-0.4445	-172.607	Hypo
NC_019460.2	19224701	19224808	107	7	0.0858	0.5302	-0.4444	-27.9355	Hypo
NC_019478.2	42314846	42314978	132	9	0.0826	0.5266	-0.444	-40.1623	Hypo
NC_019478.2	34592027	34592115	88	10	0.134	0.5776	-0.4437	-37.6091	Hypo
NC_019471.2	13181470	13181575	105	12	0.0783	0.5217	-0.4434	-64.1854	Hypo
NC_019463.2	69247017	69247164	147	6	0.3484	0.7915	-0.4431	-18.982	Hypo
NC_019468.2	25876863	25876926	63	6	0.1451	0.588	-0.4429	-19.3006	Hypo
NC_019460.2	6761697	6761799	102	12	0.1766	0.6194	-0.4429	-49.6239	Hypo
NC_019458.2	5846425	5846636	211	13	0.2028	0.6455	-0.4427	-52.3075	Hypo
NC_019483.2	3097687	3097775	88	5	0.306	0.7484	-0.4424	-18.8251	Hypo
NC_019471.2	14095173	14095379	206	12	0.2383	0.6806	-0.4423	-45.5099	Hypo
NC_019478.2	49899635	49899721	86	9	0.0906	0.5328	-0.4423	-37.7574	Hypo
NC_019471.2	11385670	11385895	225	13	0.2743	0.7163	-0.442	-56.5767	Hypo
NC_019458.2	96929832	96930465	633	9	0.2488	0.6904	-0.4417	-37.493	Hypo
NC_019459.2	235762483	235762665	182	11	0.1512	0.5921	-0.4409	-37.654	Hypo
NC_019459.2	29497325	29497578	253	15	0.1659	0.6066	-0.4407	-57.6146	Hypo
NC_019482.2	34168390	34168666	276	8	0.1302	0.5703	-0.4401	-30.6946	Hypo
NC_019478.2	39400929	39401106	177	9	0.1069	0.5467	-0.4398	-37.9813	Hypo
NC_019460.2	209855029	209855111	82	5	0.1492	0.589	-0.4398	-19.8224	Hypo
NC_019458.2	110540943	110541035	92	10	0.227	0.6659	-0.4389	-33.9858	Hypo
NC_019469.2	1722742	1722823	81	6	0.1871	0.6252	-0.4382	-20.6223	Hypo
NC_019481.2	40259801	40259909	108	9	0.1411	0.5793	-0.4382	-32.7379	Hypo
NC_019462.2	18841285	18841386	101	8	0.1388	0.5766	-0.4378	-30.4756	Hypo
NC_019471.2	49366686	49366969	283	12	0.0738	0.5112	-0.4373	-62.2872	Hypo
NC_019460.2	222036824	222036899	75	6	0.139	0.5763	-0.4373	-22.9559	Hypo
NC_019484.2	6479444	6479519	75	7	0.1156	0.5527	-0.4371	-25.3179	Hypo
NC_019460.2	190603692	190603776	84	10	0.1517	0.5887	-0.437	-39.6676	Hypo
NC_019469.2	47888228	47888341	113	13	0.1916	0.6286	-0.4369	-56.9999	Hypo
NC_019473.2	71285643	71285807	164	22	0.1551	0.5919	-0.4368	-122.909	Hypo
NC_019459.2	248233615	248233715	100	8	0.1212	0.5577	-0.4365	-26.8625	Hypo
NC_019462.2	40724655	40724821	166	13	0.1948	0.6312	-0.4363	-66.983	Hypo
NC_019460.2	8258163	8258222	59	12	0.3268	0.7626	-0.4359	-44.7374	Hypo
NC_019478.2	16546220	16546333	113	10	0.3089	0.7446	-0.4357	-35.4689	Hypo
NC_019474.2	52122047	52122115	68	9	0.1555	0.591	-0.4356	-31.8401	Hypo
NC_019468.2	31431693	31431849	156	16	0.2148	0.6505	-0.4356	-80.6362	Hypo
NC_019475.2	64753593	64753688	95	7	0.0978	0.5333	-0.4355	-25.7346	Hypo
NC_019475.2	67253077	67253433	356	16	0.1367	0.572	-0.4354	-70.1038	Hypo
NC_019461.2	118147210	118147307	97	7	0.264	0.6989	-0.4349	-28.4307	Hypo
NC_019461.2	68756220	68756393	173	18	0.093	0.5272	-0.4341	-115.648	Hypo
NC_019471.2	12467263	12467413	150	8	0.1888	0.6224	-0.4335	-30.5472	Hypo
NC_019477.2	41613064	41613218	154	8	0.1381	0.5715	-0.4335	-26.7108	Hypo
NC_019480.2	2294836	2296800	1964	27	0.2274	0.6609	-0.4335	-117.989	Hypo
NC_019481.2	38635567	38635721	154	13	0.1043	0.5376	-0.4333	-61.7875	Hypo
NC_019480.2	1081219	1081278	59	5	0.1202	0.5534	-0.4332	-16.4623	Hypo
NC_019478.2	49957373	49957499	126	12	0.1572	0.5901	-0.4329	-47.6017	Hypo
NC_019460.2	1064788	1065020	232	22	0.1097	0.542	-0.4323	-133.356	Hypo
NC_019481.2	19124195	19124378	183	13	0.1401	0.572	-0.4319	-67.0043	Hypo
NC_019460.2	7558400	7558733	333	17	0.1436	0.5753	-0.4317	-79.5025	Hypo
NC_019476.2	15291021	15291082	61	4	0.2909	0.7226	-0.4317	-15.1716	Hypo
NC_019482.2	43640195	43641112	917	46	0.1644	0.596	-0.4315	-322.03	Hypo
NC_019479.2	31759822	31759884	62	5	0.0833	0.5144	-0.4311	-21.7335	Hypo
NC_019478.2	48688302	48688448	146	14	0.0814	0.5118	-0.4305	-69.8289	Hypo
NC_019475.2	20681540	20681601	61	5	0.1149	0.545	-0.4301	-17.2956	Hypo
NC_019474.2	69737534	69737640	106	9	0.2016	0.6314	-0.4298	-29.9589	Hypo
NC_019462.2	49435369	49435468	99	6	0.221	0.6508	-0.4298	-19.9373	Hypo
NC_019460.2	174730032	174730160	128	10	0.1279	0.5572	-0.4293	-37.6375	Hypo
NC_019478.2	46237098	46237199	101	8	0.1104	0.5396	-0.4292	-46.8785	Hypo
NC_019468.2	55804191	55804274	83	8	0.132	0.5611	-0.4291	-30.2785	Hypo
NC_019470.2	16970477	16970563	86	4	0.3239	0.7525	-0.4286	-12.7978	Hypo
NC_019465.2	81592195	81592302	107	8	0.1853	0.6137	-0.4284	-27.2811	Hypo
NC_019483.2	30715200	30715265	65	5	0.1282	0.5566	-0.4284	-16.1221	Hypo
NC_019474.2	5347211	5347276	65	6	0.1804	0.6084	-0.428	-20.5443	Hypo
NC_019463.2	113690607	113690772	165	13	0.2762	0.7036	-0.4274	-49.062	Hypo
NC_019465.2	83623955	83624045	90	7	0.1022	0.5295	-0.4273	-23.6674	Hypo
NC_019460.2	168049445	168049503	58	9	0.1855	0.6127	-0.4272	-29.9634	Hypo
NC_019460.2	220668994	220669061	67	8	0.3835	0.8105	-0.427	-30.1191	Hypo
NC_019467.2	83567553	83567622	69	8	0.1741	0.6009	-0.4269	-27.4359	Hypo
NC_019468.2	52757792	52757941	149	9	0.2435	0.6704	-0.4268	-34.825	Hypo
NC_019470.2	37153736	37153823	87	10	0.1351	0.5617	-0.4267	-42.7653	Hypo
NC_019471.2	25076292	25076380	88	7	0.1718	0.5983	-0.4265	-23.4209	Hypo
NC_019475.2	18164882	18164974	92	5	0.1392	0.5656	-0.4264	-16.4699	Hypo
NC_019480.2	678362	678462	100	16	0.2017	0.6281	-0.4264	-72.6243	Hypo
NC_019461.2	117432630	117432709	79	6	0.4055	0.8313	-0.4258	-22.374	Hypo
NC_019459.2	247095952	247096124	172	11	0.1999	0.6254	-0.4255	-39.3596	Hypo
NC_019468.2	60850208	60850315	107	17	0.2119	0.6368	-0.4249	-72.8298	Hypo
NC_019466.2	17111054	17111174	120	5	0.1302	0.555	-0.4248	-16.5226	Hypo
NC_019477.2	5152	5696	544	20	0.0337	0.4581	-0.4244	-83.9784	Hypo
NC_019475.2	27941160	27941220	60	4	0.1654	0.5894	-0.424	-17.9	Hypo
NC_019460.2	1664060	1664278	218	12	0.1537	0.5778	-0.424	-47.618	Hypo
NC_019474.2	4439468	4439733	265	25	0.1471	0.5707	-0.4236	-173.875	Hypo
NC_019470.2	76460045	76460187	142	11	0.0779	0.5015	-0.4236	-44.4976	Hypo
NC_019481.2	3982044	3982129	85	17	0.2363	0.6598	-0.4236	-80.5909	Hypo
NC_019481.2	4784638	4784833	195	8	0.0944	0.5175	-0.4231	-31.6558	Hypo
NC_019478.2	40436641	40436873	232	9	0.1039	0.5266	-0.4226	-35.6423	Hypo
NC_019462.2	59151696	59151747	51	9	0.147	0.5693	-0.4223	-29.952	Hypo
NC_019481.2	7693069	7693157	88	14	0.0858	0.5079	-0.4221	-65.137	Hypo
NC_019460.2	223101904	223102001	97	8	0.1153	0.5374	-0.4221	-30.66	Hypo
NC_019472.2	14784798	14784896	98	8	0.1719	0.5937	-0.4218	-26.1617	Hypo
NC_019470.2	50659654	50659729	75	6	0.2354	0.657	-0.4216	-21.21	Hypo
NC_019476.2	52206300	52206375	75	5	0.2543	0.6759	-0.4216	-16.6684	Hypo
NC_019461.2	113682307	113682480	173	15	0.1933	0.6148	-0.4215	-69.9105	Hypo
NC_019471.2	9997006	9997084	78	8	0.1586	0.58	-0.4214	-25.9965	Hypo
NC_019474.2	63543879	63543972	93	9	0.1787	0.5998	-0.421	-29.7166	Hypo
NC_019470.2	56887018	56887174	156	12	0.2524	0.6728	-0.4204	-42.2327	Hypo
NC_019468.2	15242382	15242452	70	5	0.1069	0.5269	-0.42	-18.4355	Hypo
NC_019467.2	85605209	85605353	144	21	0.1999	0.6198	-0.4199	-100.086	Hypo
NC_019478.2	46980263	46980395	132	11	0.1662	0.5859	-0.4196	-56.7932	Hypo
NC_019468.2	16067933	16068000	67	8	0.1487	0.5681	-0.4194	-26.0371	Hypo
NC_019460.2	2657726	2658072	346	18	0.2423	0.661	-0.4187	-73.297	Hypo
NC_019460.2	214637596	214638012	416	13	0.1245	0.5432	-0.4186	-51.7631	Hypo
NC_019460.2	690225	690416	191	16	0.1338	0.5523	-0.4185	-76.1574	Hypo
NC_019458.2	86382553	86382649	96	10	0.2318	0.6502	-0.4184	-31.4539	Hypo
NC_019458.2	21510503	21510615	112	13	0.1681	0.586	-0.4179	-50.5022	Hypo
NC_019478.2	43737273	43737376	103	6	0.1311	0.5488	-0.4177	-18.7312	Hypo
NC_019484.2	54861519	54861830	311	44	0.0866	0.504	-0.4173	-342.554	Hypo
NC_019468.2	14848207	14848266	59	5	0.0912	0.5085	-0.4172	-25.5943	Hypo
NC_019458.2	261652812	261652915	103	9	0.2124	0.6288	-0.4165	-28.1913	Hypo
NC_019481.2	41218483	41218724	241	12	0.0961	0.5124	-0.4163	-53.5766	Hypo
NC_019468.2	55523915	55524017	102	13	0.3179	0.7341	-0.4163	-46.2898	Hypo
NC_019460.2	2780013	2780111	98	6	0.1616	0.5778	-0.4161	-20.0778	Hypo
NC_019476.2	32497	32907	410	17	0.2128	0.6287	-0.4159	-90.8222	Hypo
NC_019478.2	47086772	47087005	233	14	0.3169	0.732	-0.4151	-70.4961	Hypo
NC_019478.2	49552284	49552454	170	13	0.1046	0.5197	-0.4151	-59.7616	Hypo
NC_019460.2	218925159	218925296	137	8	0.108	0.5224	-0.4144	-29.7706	Hypo
NC_019478.2	44479983	44480120	137	13	0.0966	0.5108	-0.4143	-61.0695	Hypo
NC_019475.2	13022175	13022249	74	6	0.1744	0.5886	-0.4143	-19.1637	Hypo
NC_019479.2	48076949	48077066	117	12	0.2183	0.6324	-0.4141	-42.8452	Hypo
NC_019473.2	58649502	58649643	141	9	0.1295	0.5433	-0.4138	-33.1446	Hypo
NC_019468.2	49964744	49964878	134	9	0.1416	0.5552	-0.4136	-32.9518	Hypo
NC_019468.2	43850739	43850903	164	9	0.116	0.5294	-0.4134	-36.2374	Hypo
NC_019469.2	1612093	1612185	92	11	0.3007	0.714	-0.4133	-38.3993	Hypo
NC_019468.2	53840536	53840643	107	6	0.1137	0.5269	-0.4132	-20.252	Hypo
NC_019458.2	101301402	101301501	99	11	0.2075	0.6206	-0.4131	-35.2283	Hypo
NC_019481.2	24459057	24459158	101	7	0.2883	0.7014	-0.4131	-22.6992	Hypo
NC_019460.2	2722323	2722398	75	7	0.1769	0.5897	-0.4128	-23.0465	Hypo
NC_019462.2	40713555	40713662	107	11	0.155	0.5677	-0.4127	-43.4346	Hypo
NC_019476.2	17688534	17688725	191	17	0.1887	0.6011	-0.4124	-77.5896	Hypo
NC_019480.2	19950831	19950923	92	7	0.2049	0.6172	-0.4123	-23.4095	Hypo
NC_019460.2	222337707	222337786	79	6	0.1285	0.5408	-0.4123	-18.3465	Hypo
NC_019466.2	15509044	15509143	99	10	0.302	0.7138	-0.4118	-38.2518	Hypo
NC_019459.2	246052188	246052302	114	17	0.1846	0.5963	-0.4117	-66.049	Hypo
NC_019468.2	44006457	44006633	176	13	0.1217	0.5332	-0.4115	-47.7923	Hypo
NC_019468.2	61177014	61177075	61	4	0.2701	0.6815	-0.4114	-14.4969	Hypo
NC_019470.2	75192015	75192278	263	13	0.1629	0.5736	-0.4108	-50.9767	Hypo
NC_019473.2	71524416	71524467	51	5	0.1117	0.5217	-0.41	-16.2352	Hypo
NC_019462.2	12273505	12273696	191	11	0.0875	0.4973	-0.4097	-55.2199	Hypo
NC_019472.2	49543754	49543856	102	6	0.1677	0.5774	-0.4097	-19.5829	Hypo
NC_019471.2	11725879	11725975	96	10	0.1533	0.5625	-0.4092	-37.9825	Hypo
NC_019462.2	17865324	17865397	73	7	0.0879	0.4969	-0.4091	-30.3643	Hypo
NC_019475.2	65812950	65813002	52	6	0.2232	0.6322	-0.409	-20.4871	Hypo
NC_019475.2	1813752	1813835	83	11	0.3267	0.7356	-0.4089	-36.2843	Hypo
NC_019468.2	61547074	61547133	59	7	0.1579	0.5668	-0.4088	-22.6177	Hypo
NC_019468.2	61164053	61164125	72	14	0.2511	0.6598	-0.4087	-52.5116	Hypo
NC_019480.2	56713261	56713378	117	13	0.1026	0.5113	-0.4087	-59.3083	Hypo
NC_019469.2	48568572	48568663	91	16	0.2248	0.6329	-0.4081	-66.5626	Hypo
NC_019472.2	49109353	49109511	158	11	0.1784	0.5864	-0.408	-47.2417	Hypo
NC_019459.2	23867025	23867149	124	10	0.0796	0.4874	-0.4078	-40.3422	Hypo
NC_019473.2	95524	95652	128	17	0.1388	0.5463	-0.4074	-77.7117	Hypo
NC_019481.2	10081918	10082051	133	12	0.1786	0.5861	-0.4074	-43.8038	Hypo
NC_019470.2	58000597	58000651	54	5	0.077	0.4839	-0.4069	-27.8728	Hypo
NC_019468.2	56070625	56070763	138	12	0.1709	0.5779	-0.4069	-48.3171	Hypo
NC_019465.2	82503972	82504200	228	16	0.3037	0.7094	-0.4057	-72.0872	Hypo
NC_019460.2	1302071	1302133	62	11	0.2803	0.6851	-0.4048	-42.9806	Hypo
NC_019458.2	5405391	5405567	176	7	0.199	0.6037	-0.4047	-26.9599	Hypo
NC_019471.2	52701256	52701501	245	16	0.2407	0.645	-0.4044	-73.6112	Hypo
NC_019472.2	74661635	74661736	101	7	0.3046	0.7091	-0.4044	-25.402	Hypo
NC_019468.2	43074361	43074516	155	15	0.1722	0.5766	-0.4044	-60.0057	Hypo
NC_019478.2	46513943	46514035	92	11	0.1442	0.5486	-0.4043	-49.8459	Hypo
NC_019476.2	56530812	56530865	53	6	0.1797	0.5837	-0.404	-22.5198	Hypo
NC_019468.2	56485168	56485311	143	11	0.0994	0.5026	-0.4032	-47.3398	Hypo
NC_019478.2	48737960	48738058	98	8	0.0868	0.4895	-0.4027	-33.3262	Hypo
NC_019472.2	54650414	54650520	106	15	0.3236	0.7263	-0.4027	-61.4116	Hypo
NC_019480.2	84076	84811	735	33	0.1249	0.5273	-0.4024	-202.904	Hypo
NC_019472.2	40864801	40864978	177	8	0.2274	0.6297	-0.4022	-31.5099	Hypo
NC_019471.2	13899186	13899308	122	14	0.2618	0.6634	-0.4016	-51.4656	Hypo
NC_019471.2	48919895	48919966	71	10	0.1839	0.5852	-0.4013	-35.1599	Hypo
NC_019460.2	5183905	5184004	99	15	0.2772	0.6779	-0.4007	-55.7743	Hypo
NC_019476.2	43979	44162	183	15	0.2121	0.6129	-0.4007	-70.4438	Hypo
NC_019468.2	60114488	60114605	117	15	0.197	0.5974	-0.4004	-58.28	Hypo
NC_019478.2	45838453	45838670	217	10	0.1703	0.5696	-0.3993	-42.2012	Hypo
NC_019462.2	14810063	14810181	118	7	0.0793	0.4784	-0.3991	-38.4465	Hypo
NC_019468.2	18148493	18148571	78	9	0.1107	0.5096	-0.3989	-34.4847	Hypo
NC_019460.2	212295937	212296194	257	15	0.1938	0.5925	-0.3987	-72.0311	Hypo
NC_019474.2	72169428	72169587	159	13	0.2272	0.6257	-0.3986	-47.3098	Hypo
NC_019467.2	19491067	19491164	97	12	0.1953	0.593	-0.3976	-43.9128	Hypo
NC_019478.2	47264139	47264332	193	14	0.1604	0.5578	-0.3974	-53.6352	Hypo
NC_019477.2	26502961	26503146	185	17	0.0669	0.4642	-0.3973	-65.4668	Hypo
NC_019460.2	217690596	217690718	122	20	0.2075	0.6038	-0.3962	-88.6279	Hypo
NC_019460.2	220305742	220306001	259	19	0.1199	0.516	-0.3961	-86.6658	Hypo
NC_019465.2	89944354	89944427	73	10	0.2112	0.6071	-0.3959	-40.6255	Hypo
NC_019460.2	217032843	217032963	120	10	0.1571	0.5528	-0.3958	-34.2436	Hypo
NC_019476.2	55662884	55663072	188	8	0.1016	0.4973	-0.3957	-30.221	Hypo
NC_019459.2	761023	761252	229	24	0.1664	0.5618	-0.3954	-110.659	Hypo
NC_019481.2	41530586	41530653	67	12	0.2891	0.6843	-0.3952	-50.8456	Hypo
NC_019471.2	44873730	44874066	336	30	0.095	0.4896	-0.3947	-172.026	Hypo
NC_019468.2	30997803	30998045	242	22	0.2948	0.6885	-0.3937	-119.042	Hypo
NC_019468.2	54965905	54966105	200	14	0.112	0.505	-0.393	-66.6041	Hypo
NC_019462.2	5793404	5793571	167	13	0.1022	0.4951	-0.3929	-60.0425	Hypo
NC_019477.2	50617358	50617469	111	11	0.1519	0.5439	-0.3919	-39.3988	Hypo
NC_019461.2	118127401	118127475	74	6	0.1492	0.5411	-0.3918	-19.7896	Hypo
NC_019460.2	524371	524434	63	5	0.2269	0.6186	-0.3917	-16.8237	Hypo
NC_019478.2	45061013	45061173	160	5	0.1472	0.5385	-0.3913	-20.4074	Hypo
NC_019482.2	35190135	35190187	52	5	0.3245	0.7157	-0.3912	-16.1861	Hypo
NC_019465.2	88468665	88468718	53	6	0.1452	0.5364	-0.3912	-22.2889	Hypo
NC_019458.2	86507912	86507975	63	9	0.2172	0.6082	-0.391	-33.8615	Hypo
NC_019472.2	64655717	64655768	51	10	0.1988	0.5893	-0.3905	-34.0906	Hypo
NC_019459.2	243985184	243985409	225	21	0.1141	0.5044	-0.3904	-84.7417	Hypo
NC_019468.2	44781514	44781711	197	8	0.2112	0.6014	-0.3903	-27.5716	Hypo
NC_019481.2	277279	281164	3885	30	0.1451	0.5348	-0.3897	-160.919	Hypo
NC_019460.2	5678522	5678687	165	19	0.1529	0.5425	-0.3896	-80.5515	Hypo
NC_019466.2	2539	2636	97	5	0.1624	0.5517	-0.3893	-36.9019	Hypo
NC_019460.2	218113428	218113480	52	9	0.2429	0.6319	-0.3891	-43.2637	Hypo
NC_019467.2	86249578	86249699	121	14	0.1975	0.5864	-0.3889	-55.8967	Hypo
NC_019474.2	71601916	71602002	86	6	0.3215	0.7101	-0.3886	-22.2793	Hypo
NC_019484.2	1027009	1027257	248	14	0.2083	0.5969	-0.3886	-55.3718	Hypo
NC_019474.2	53772816	53772999	183	29	0.1705	0.5587	-0.3882	-158.843	Hypo
NC_019475.2	1060470	1060549	79	6	0.1391	0.5265	-0.3874	-20.0086	Hypo
NC_019474.2	69091276	69091523	247	18	0.101	0.488	-0.387	-91.8546	Hypo
NC_019460.2	20360251	20360376	125	11	0.253	0.6396	-0.3866	-38.8203	Hypo
NC_019484.2	5225154	5225233	79	6	0.1729	0.559	-0.386	-22.3154	Hypo
NC_019460.2	111243210	111243265	55	8	0.1131	0.4991	-0.386	-34.296	Hypo
NC_019469.2	39930825	39930896	71	8	0.1846	0.5704	-0.3858	-26.1787	Hypo
NC_019468.2	27415206	27415261	55	4	0.2709	0.6563	-0.3855	-13.7601	Hypo
NC_019458.2	267746491	267746586	95	4	0.176	0.5607	-0.3846	-17.9061	Hypo
NC_019466.2	1680	2483	803	28	0.1642	0.5487	-0.3845	-197.393	Hypo
NC_019458.2	110820233	110820972	739	87	0.2946	0.6788	-0.3842	-552.622	Hypo
NC_019475.2	20657554	20657640	86	9	0.0963	0.4801	-0.3838	-32.267	Hypo
NC_019460.2	6663538	6663644	106	11	0.1237	0.5064	-0.3827	-42.6591	Hypo
NC_019469.2	49432796	49432913	117	10	0.2551	0.6364	-0.3813	-40.4242	Hypo
NC_019459.2	110777900	110778207	307	28	0.1233	0.5046	-0.3813	-135.718	Hypo
NC_019481.2	38153366	38153470	104	15	0.3236	0.7047	-0.3811	-52.6628	Hypo
NC_019474.2	70543360	70543490	130	19	0.1994	0.58	-0.3806	-76.6385	Hypo
NC_019482.2	12991656	12991851	195	16	0.0826	0.463	-0.3804	-75.9845	Hypo
NC_019475.2	15813343	15813428	85	9	0.1469	0.5264	-0.3796	-32.7611	Hypo
NC_019468.2	55850053	55850153	100	15	0.1549	0.5343	-0.3794	-66.8936	Hypo
NC_019460.2	221595634	221595687	53	6	0.1467	0.525	-0.3783	-20.2689	Hypo
NC_019458.2	170302231	170302362	131	13	0.327	0.7038	-0.3768	-46.2669	Hypo
NC_019465.2	88728397	88728549	152	6	0.1837	0.5593	-0.3757	-31.7956	Hypo
NC_019460.2	1319076	1319332	256	15	0.135	0.5102	-0.3751	-61.8126	Hypo
NC_019482.2	1652375	1652583	208	28	0.2423	0.6163	-0.374	-139.859	Hypo
NC_019464.2	65004221	65004370	149	10	0.1431	0.5168	-0.3737	-37.9839	Hypo
NC_019481.2	1984965	1985032	67	10	0.0796	0.4531	-0.3735	-57.0766	Hypo
NC_019479.2	50735411	50735486	75	4	0.1945	0.5675	-0.373	-16.6421	Hypo
NC_019473.2	1012561	1012700	139	10	0.0677	0.4399	-0.3722	-42.8147	Hypo
NC_019465.2	89063064	89063132	68	9	0.1647	0.5366	-0.3718	-31.7717	Hypo
NC_019480.2	639452	639593	141	20	0.2578	0.6293	-0.3715	-77.6691	Hypo
NC_019482.2	34230500	34230587	87	7	0.1489	0.5195	-0.3706	-25.7111	Hypo
NC_019468.2	51646175	51646351	176	20	0.1259	0.4961	-0.3701	-94.988	Hypo
NC_019468.2	38853735	38853897	162	18	0.1372	0.5072	-0.37	-83.0242	Hypo
NC_019460.2	211977870	211978176	306	24	0.2019	0.5707	-0.3688	-103.924	Hypo
NC_019480.2	584042	584094	52	6	0.1427	0.5113	-0.3686	-24.9281	Hypo
NC_019478.2	46246472	46246771	299	22	0.2213	0.5897	-0.3684	-98.9867	Hypo
NC_019470.2	79022089	79022195	106	7	0.0771	0.4452	-0.3681	-31.3646	Hypo
NC_019461.2	86708161	86708300	139	25	0.1045	0.472	-0.3676	-132.956	Hypo
NC_019478.2	39341490	39341590	100	13	0.0608	0.428	-0.3672	-51.3092	Hypo
NC_019478.2	48852085	48852136	51	9	0.2433	0.6103	-0.367	-34.1591	Hypo
NC_019460.2	2350476	2350632	156	20	0.1788	0.5455	-0.3667	-101.22	Hypo
NC_019460.2	96119879	96120001	122	13	0.2208	0.5873	-0.3665	-46.5622	Hypo
NC_019480.2	60039425	60039497	72	5	0.0864	0.4524	-0.366	-18.5154	Hypo
NC_019482.2	3651	5497	1846	182	0.1099	0.475	-0.3651	-1865.98	Hypo
NC_019470.2	77511169	77511403	234	16	0.1224	0.4873	-0.3649	-65.7477	Hypo
NC_019477.2	48629892	48630053	161	17	0.133	0.4973	-0.3643	-64.5476	Hypo
NC_019478.2	46509610	46509670	60	7	0.1031	0.4674	-0.3643	-28.356	Hypo
NC_019466.2	14869477	14869694	217	25	0.2328	0.5971	-0.3643	-118.458	Hypo
NC_019460.2	17884697	17884868	171	16	0.2486	0.6125	-0.364	-70.5449	Hypo
NC_019468.2	56456066	56456149	83	6	0.0875	0.4505	-0.363	-20.6678	Hypo
NC_019479.2	50021419	50021838	419	26	0.1001	0.4627	-0.3626	-136.36	Hypo
NC_019479.2	43122510	43122577	67	13	0.1736	0.536	-0.3623	-53.7521	Hypo
NC_019473.2	4654731	4654823	92	7	0.4395	0.7997	-0.3602	-27.776	Hypo
NC_019468.2	61472892	61472948	56	6	0.4036	0.7633	-0.3597	-23.2791	Hypo
NC_019460.2	222644757	222648774	4017	7	0.1021	0.4615	-0.3594	-34.1178	Hypo
NC_019468.2	37297130	37297245	115	19	0.0774	0.4361	-0.3587	-87.1142	Hypo
NC_019476.2	40679	40760	81	7	0.2063	0.5644	-0.3581	-32.2927	Hypo
NC_019478.2	48705023	48705203	180	8	0.2719	0.6288	-0.3569	-29.2805	Hypo
NC_019475.2	24296458	24296640	182	24	0.2845	0.6414	-0.3568	-107.186	Hypo
NC_019477.2	7585	7725	140	4	0.0121	0.3689	-0.3567	-15.667	Hypo
NC_019481.2	9393075	9393387	312	35	0.1638	0.5203	-0.3565	-194.653	Hypo
NC_019466.2	256247	256850	603	49	0.2034	0.5594	-0.3559	-308.568	Hypo
NC_019459.2	142657166	142657386	220	18	0.0601	0.4136	-0.3535	-83.4309	Hypo
NC_019480.2	698892	698945	53	6	0.1107	0.4628	-0.3522	-20.1783	Hypo
NC_019470.2	52476089	52476166	77	5	0.2075	0.5585	-0.351	-19.2249	Hypo
NC_019475.2	66918539	66918790	251	31	0.3326	0.6835	-0.3509	-141.919	Hypo
NC_019463.2	112848051	112848222	171	21	0.2494	0.6	-0.3507	-80.6085	Hypo
NC_019482.2	2002	3344	1342	161	0.12	0.47	-0.35	-1737.27	Hypo
NC_019466.2	18949524	18949614	90	10	0.1364	0.4857	-0.3493	-45.7688	Hypo
NC_019470.2	80272070	80272213	143	11	0.0863	0.4356	-0.3492	-44.684	Hypo
NC_019460.2	223328621	223328672	51	4	0.1014	0.4501	-0.3487	-17.9177	Hypo
NC_019462.2	43041597	43041695	98	16	0.2584	0.607	-0.3486	-64.9507	Hypo
NC_019468.2	35894618	35895665	1047	11	0.2633	0.6117	-0.3483	-33.2464	Hypo
NC_019469.2	3599067	3599138	71	21	0.2804	0.626	-0.3457	-94.9498	Hypo
NC_019479.2	20763739	20763803	64	5	0.2297	0.5751	-0.3455	-18.8094	Hypo
NC_019480.2	53752641	53752803	162	10	0.2988	0.6438	-0.3449	-43.8794	Hypo
NC_019466.2	476155	476377	222	14	0.3196	0.6618	-0.3421	-75.5275	Hypo
NC_019475.2	56428672	56428741	69	11	0.0885	0.4305	-0.3419	-88.826	Hypo
NC_019477.2	17177458	17177582	124	11	0.1932	0.5331	-0.3399	-40.1493	Hypo
NC_019480.2	48755226	48755340	114	10	0.1026	0.4423	-0.3398	-49.6879	Hypo
NC_019479.2	50423564	50423752	188	21	0.2202	0.5591	-0.3389	-92.6936	Hypo
NC_019479.2	30256875	30257001	126	19	0.276	0.6141	-0.3381	-83.8825	Hypo
NC_019472.2	78095205	78095409	204	29	0.3689	0.7051	-0.3362	-130.315	Hypo
NC_019460.2	131951947	131952027	80	12	0.2417	0.5766	-0.3349	-52.507	Hypo
NC_019479.2	50734876	50734932	56	13	0.0604	0.3949	-0.3345	-57.8568	Hypo
NC_019466.2	17896	17990	94	7	0.2918	0.6262	-0.3344	-35.5636	Hypo
NC_019484.2	6887904	6887962	58	9	0.3875	0.7201	-0.3325	-37.1547	Hypo
NC_019470.2	52156741	52156861	120	13	0.0984	0.4306	-0.3321	-54.9312	Hypo
NC_019460.2	222648869	222648969	100	14	0.1713	0.503	-0.3317	-70.9828	Hypo
NC_019472.2	63006622	63006716	94	4	0.0679	0.3988	-0.3308	-17.3886	Hypo
NC_019466.2	476455	476619	164	13	0.3447	0.6738	-0.3291	-68.0112	Hypo
NC_019473.2	53056575	53056791	216	19	0.1191	0.4478	-0.3287	-87.6895	Hypo
NC_019473.2	1056085	1056193	108	11	0.3645	0.6921	-0.3276	-47.9785	Hypo
NC_019462.2	3911893	3911967	74	15	0.2164	0.5426	-0.3261	-61.8564	Hypo
NC_019461.2	116831002	116836037	5035	10	0.1946	0.5185	-0.3239	-29.8657	Hypo
NC_019472.2	17475534	17475813	279	29	0.0585	0.3788	-0.3203	-198.318	Hypo
NC_019466.2	15271692	15271768	76	8	0.1309	0.4507	-0.3197	-49.282	Hypo
NC_019482.2	43648061	43648116	55	5	0.2083	0.522	-0.3137	-22.9169	Hypo
NC_019462.2	41570740	41572018	1278	11	0.2451	0.5524	-0.3073	-34.343	Hypo
NC_019470.2	40897014	40897207	193	40	0.0727	0.3651	-0.2924	-199.454	Hypo
NC_019472.2	49105715	49107000	1285	19	0.2686	0.5435	-0.2749	-72.9703	Hypo
NC_019466.2	11309	11375	66	5	0.088	0.3515	-0.2635	-42.221	Hypo
NC_019472.2	62840641	62848311	7670	19	0.2792	0.5324	-0.2532	-39.6192	Hypo
NC_019468.2	34457089	34460890	3801	28	0.3961	0.5189	-0.1228	-53.7332	Hypo
NC_019470.2	66232135	66236637	4502	9	0.3922	0.4676	-0.0754	-6.2902	Hypo
